# Supplementary material
Source: PubMed Central journal article supplement (PMC2813984)

Supporting Information

**Uniting Anion Relay Chemistry with Pd-Mediated Cross Coupling: Design,  
Synthesis and Evaluation of Bifunctional Aryl and Vinyl Silane Linchpins.**

Amos B. Smith, III,\* Won-Suk Kim, and Rongbiao Tong

*Department of Chemistry, Laboratory for Research on the Structure of Matter, and Monell  
Chemical Senses Center, University of Pennsylvania, Philadelphia, PA 19104, U.S.A.*

Table of Contents:

|                                                  |          |
|--------------------------------------------------|----------|
| -General Methods and Experimental Procedures     | S2-S38   |
| - <sup>1</sup> H and <sup>13</sup> C NMR Spectra | S39-S172 |

## Experimental

### I. Materials and Methods

Except as otherwise indicated, reactions were run out under an argon atmosphere in flame- or oven-dried glassware. After aqueous work-up, all organic extracts were dried over sodium or magnesium sulfate, and filtered prior to concentration. Diethyl ether and THF were obtained from a Pure Solve™ PS-400. Hexamethylphosphoramide (HMPA) was freshly distilled from calcium hydride under vacuum. *n*-BuLi (2.5M in THF), Copper (I) iodide (99.999% metals basis) and Pd(PPh<sub>3</sub>)<sub>4</sub> (99%) were purchased from Aldrich, and used without purification. Reactions were monitored by thin layer chromatography (TLC) with 0.25-mm E. Merck pre-coated silica gel plates (Kieselgel 60F<sub>254</sub>, Merck). Spots were detected by viewing under a UV light, colorizing with charring after dipping in anisaldehyde solution composed of acetic acid, sulfuric acid, and MeOH or in KMnO<sub>4</sub> solution composed of potassium carbonate, sodium hydroxide, and water. Silica gel for flash chromatography (particle size 0.040-0.063 mm) was supplied by Silicycle and Sorbent technologies. Yields refer to chromatographically and spectroscopically pure compounds unless otherwise noted. <sup>1</sup>H and <sup>13</sup>C spectra were recorded on a Bruker AM-500 spectrometer. Chemical shifts are reported as δ values relative to internal chloroform (δ 7.26 for <sup>1</sup>H and δ 77.0 for <sup>13</sup>C) and benzene (δ 7.16 for <sup>1</sup>H and δ 128.0 for <sup>13</sup>C). IR spectra were measured as neat oils on a Perkin-Elmer Model 1600 FTIR. Optical rotations were measured on a Jasco polarimeter. High resolution mass spectra were obtained at the University of Pennsylvania Mass Spectrometry Service Center.

## II. Experiment Section:

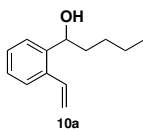

**Compound 10a.** To a solution of *o*-TMS benzaldehyde **10** (116.4 mg, 0.65 mmol, 1.0 equiv.) in Et<sub>2</sub>O (1 mL) at -78 °C was added *n*-BuLi (2.5M in hexane, 0.31 mL, 0.78 mmol, 1.2 equiv.) dropwise. After stirring for 30 min, the resulting solution was added to a mixture of CuI (148.5 mg, 0.78 mmol, 1.2 equiv.) in HMPA/THF (1 mL/1 mL) via cannula at 0 °C. The resulting solution was warmed to room temperature. After being stirred for 30 min, vinyl bromide (1.3 mL, 1.3 mmol, 2.0 equiv.) and Pd(PPh<sub>3</sub>)<sub>4</sub> (22.5 mg, 0.02 mmol, 0.03 equiv.) in THF (1 mL) were added. After being stirred for 6 h at room temperature, 3 mL of 1N HCl was added. After 10 min, a saturated aqueous NH<sub>4</sub>Cl (3 mL) solution was added, and the resulting mixture extracted with Et<sub>2</sub>O (10 mL x 3). The combined organic layers were washed with brine, dried over MgSO<sub>4</sub>, filtered and concentrated *in vacuo*. Flash chromatography (ethyl acetate/hexane = 1/15) afforded **10a** (83.2 mg, 0.44 mmol, 67% yield) as a pale yellow oil. R<sub>f</sub> 0.4 (hexane/diethyl ether = 5/1); IR (film) 3365 (m), 3063 (w), 2956 (s), 2860 (s), 1452 (m), 1043 (m), 760 (s) cm<sup>-1</sup>; <sup>1</sup>H NMR (500 MHz, CDCl<sub>3</sub>) δ 7.49-7.46 (m, 2H), 7.32-7.29 (m, 1H), 7.27-7.24 (m, 1H), 7.06 (dd, *J* = 17.0 and 11.0 Hz, 1H), 5.62 (dd, *J* = 17.0 and 1.0 Hz, 1H), 5.32 (dd, *J* = 11.0 and 1.5 Hz, 1H), 5.02-4.99 (m, 1H), 1.88 (br, 1H), 1.79-1.70 (m, 2H), 1.48-1.23 (m, 4H), 0.91 (t, *J* = 6.5 Hz, 3H); <sup>13</sup>C NMR (125 MHz, CDCl<sub>3</sub>) δ 142.0, 135.6, 134.2, 128.0, 127.3, 126.1, 125.4, 116.4, 70.8, 38.1, 28.1, 22.6, 14.0; high resolution mass spectrum (Cl<sup>+</sup>) *m/z* 190.1354 [(M)<sup>+</sup>; calcd for C<sub>13</sub>H<sub>18</sub>O: 190.1358].

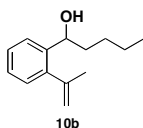

**Compound 10b.** Using conditions similar to those used for **10a**, *o*-TMS benzaldehyde **10** (116.3 mg, 0.65 mmol, 1.0 equiv.) afforded **10b** (73.4 mg, 0.36 mmol, 55% yield) as a colorless oil after flash chromatography (ethyl acetate/hexane = 1/10), and preparative thin layer chromatography (ethyl acetate/benzene = 1/30). R<sub>f</sub> 0.41 (hexane/diethyl ether = 5/1); IR (film) 3361 (m), 3073 (w),

3023 (w), 2957 (s), 2932 (s), 2860 (m), 1640 (w), 1451 (m), 1046 (m)  $\text{cm}^{-1}$ ;  $^1\text{H}$  NMR (500 MHz,  $\text{CDCl}_3$ )  $\delta$  7.51 (d,  $J = 8.0$  Hz, 1H), 7.30 (t,  $J = 8.0$  Hz, 1H), 7.23 (t,  $J = 7.5$  Hz, 1H), 7.11 (d,  $J = 7.5$  Hz, 1H), 5.22 (s, 1H), 4.91 (dd,  $J = 8.2$  and  $5.0$  Hz, 1H), 4.83 (s, 1H), 2.07 (s, 3H), 1.84-1.76 (m, 2H), 1.73-1.66 (m, 1H), 1.48-1.39 (m, 1H), 1.38-1.24 (m, 3H), 0.89 (t,  $J = 7.1$  Hz, 3H);  $^{13}\text{C}$  NMR (125 MHz,  $\text{CDCl}_3$ )  $\delta$  144.9, 142.5, 141.4, 128.0, 127.4, 127.1, 125.6, 115.5, 70.6, 38.6, 28.4, 25.7, 22.6, 14.0; high resolution mass spectrum ( $\text{ES}^+$ )  $m/z$  203.1437 [(M-H) $^+$ ]; calcd for  $\text{C}_{14}\text{H}_{19}\text{O}$ : 203.1436].

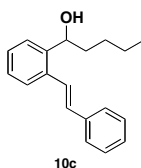

**Compound 10c.** Using conditions similar to those used for **10a**, *o*-TMS benzaldehyde **10** (77 mg, 0.43 mmol, 1.0 equiv.) afforded **10c** (74.6 mg, 0.28 mmol, 65% yield) as a colorless oil after flash chromatography (ethyl acetate/hexane = 1/10), and preparative thin layer chromatography (ethyl acetate/benzene = 1/20).  $R_f$  0.45 (hexane/ethyl acetate = 4/1); IR (film) 3365 (m), 3026 (m), 2954 (s), 2930 (s), 2858 (m), 1599 (w), 1494 (m), 1449 (m), 1032 (m), 960 (s)  $\text{cm}^{-1}$ ;  $^1\text{H}$  NMR (500 MHz,  $\text{CDCl}_3$ )  $\delta$  7.59 (dd,  $J = 7.0$  and  $1.5$  Hz, 1H), 7.52-7.49 (m, 3H), 7.47 (d,  $J = 16.0$  Hz, 1H), 7.39-7.36 (m, 2H), 7.34-7.27 (m, 3H), 6.97 (d,  $J = 16.0$  Hz, 1H), 5.13-5.10 (m, 1H), 1.82-1.75 (m, 3H), 1.44-1.42 (m, 1H), 1.41-1.30 (m, 3H), 0.88 (t,  $J = 7.0$  Hz, 3H);  $^{13}\text{C}$  NMR (125 MHz,  $\text{CDCl}_3$ )  $\delta$  142.4, 139.1, 137.6, 135.4, 131.3, 128.9, 128.0, 127.9, 127.7, 126.7, 126.4, 125.9, 71.3, 38.3, 28.3, 22.7, 14.2; high resolution mass spectrum ( $\text{ES}^+$ )  $m/z$  301.1373 [(M+Cl) $^+$ ]; calcd for  $\text{C}_{19}\text{H}_{22}\text{OCl}$ : 301.1359].

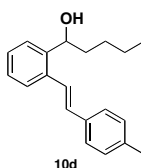

**Compound 10d.** Using conditions similar to those used for **10a**, *o*-TMS benzaldehyde **10** (78.3 mg, 0.44 mmol, 1.0 equiv.) afforded **10d** (70.1 mg, 0.25 mmol, 57% yield) as a colorless oil after flash chromatography (diethyl ether/hexane = 1/10), and preparative thin layer chromatography

(ethyl acetate/benzene = 1/25).  $R_f$  0.42 (hexane/ethyl acetate = 4/1); IR (film) 3359 (m), 3024 (m), 2929 (s), 2859 (m), 1513 (m), 1451 (m), 1038 (w), 962 (m)  $\text{cm}^{-1}$ ;  $^1\text{H}$  NMR (500 MHz,  $\text{CDCl}_3$ )  $\delta$  7.57 (d,  $J = 8.0$  Hz, 1H), 7.52 (d,  $J = 8.0$  Hz, 1H), 7.43-7.40 (m, 3H), 7.32-7.27 (m, 2H), 7.19 (d,  $J = 7.9$  Hz, 2H), 6.94 (d,  $J = 16.0$  Hz, 1H), 5.27-5.09 (m, 1H), 2.37 (s, 3H), 1.81-1.77 (m, 3H), 1.49-1.42 (m, 1H), 1.39-1.29 (m, 3H), 0.88 (t,  $J = 7.0$  Hz, 3H);  $^{13}\text{C}$  NMR (125 MHz,  $\text{CDCl}_3$ )  $\delta$  142.3, 137.8, 135.5, 134.9, 131.2, 129.6, 127.8, 127.6, 126.6, 126.3, 125.8, 124.8, 71.2, 38.3, 28.3, 22.7, 21.4, 14.2; high resolution mass spectrum ( $\text{ES}^+$ )  $m/z$  281.1909 [(M+H) $^+$ ]; calcd for  $\text{C}_{20}\text{H}_{25}\text{O}$ : 281.1905].

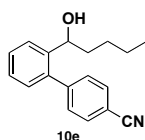

**Compound 10e.** Using conditions similar to those used for **10a**, *o*-TMS benzaldehyde **10** (86.1 mg, 0.48 mmol, 1.0 equiv.) afforded **10e** (76.9 mg, 0.29 mmol, 60% yield) as a pale yellow oil after flash chromatography (ethyl acetate/hexane = 1/15).  $R_f$  0.31 (hexane/ethyl acetate = 4/1); IR (film) 3435 (m), 3072 (m), 2957 (s), 2930 (s), 2859 (m), 2229 (s), 1607 (m), 1481 (m), 1399 (m), 1005 (m)  $\text{cm}^{-1}$ ;  $^1\text{H}$  NMR (500 MHz,  $\text{CDCl}_3$ )  $\delta$  7.71 (dd,  $J = 6.5$  and 1.5 Hz, 2H), 7.65 (d,  $J = 8.0$  Hz, 1H), 7.48-7.43 (m, 3H), 7.34 (t,  $J = 7.5$  Hz, 1H), 7.17 (d,  $J = 8.0$  Hz, 1H), 4.67-4.64 (m, 1H), 1.77-1.70 (m, 2H), 1.65-1.58 (m, 1H), 1.25-1.08 (m, 4H), 0.80 (t,  $J = 7.0$  Hz, 3H);  $^{13}\text{C}$  NMR (125 MHz,  $\text{CDCl}_3$ )  $\delta$  146.1, 142.0, 139.1, 132.1, 130.3, 129.7, 129.1, 127.6, 126.2, 118.9, 111.2, 70.4, 38.6, 28.2, 22.5, 14.0; high resolution mass spectrum ( $\text{ES}^+$ )  $m/z$  288.1375 [(M+Na) $^+$ ]; calcd for  $\text{C}_{18}\text{H}_{19}\text{NONa}$ : 288.1364].

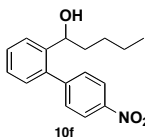

**Compound 10f.** Using conditions similar to those used for **10a**, *o*-TMS benzaldehyde **10** (124.1 mg, 0.69 mmol, 1.0 equiv.) afforded **10f** (115.7 mg, 0.40 mmol, 58% yield) as a pale yellow oil after flash chromatography (diethyl ether/hexane = 1/10).  $R_f$  0.23 (hexane/ethyl acetate = 5/1); IR (film) 3389 (m), 3063 (w), 2955 (s), 2929 (s), 2858 (s), 1596 (s), 1519 (s), 1347 (s), 1311 (m),

1006 (m)  $\text{cm}^{-1}$ ;  $^1\text{H}$  NMR (500 MHz,  $\text{CDCl}_3$ )  $\delta$  8.27 (d,  $J = 8.5$  Hz, 2H), 7.66 (d,  $J = 8.0$  Hz, 1H), 7.50-7.46 (m, 3H), 7.36 (t,  $J = 7.5$  Hz, 1H), 7.19 (d,  $J = 7.5$  Hz, 1H), 4.66 (dd,  $J = 8.0$  and 5.0 Hz, 1H), 1.89 (br, 1H), 1.75-1.71 (m, 1H), 1.66-1.60 (m, 1H), 1.27-1.09 (m, 4H), 0.80 (t,  $J = 7.0$  Hz, 3H);  $^{13}\text{C}$  NMR (125 MHz,  $\text{CDCl}_3$ )  $\delta$  148.0, 147.0, 141.8, 138.5, 130.3, 129.4, 129.0, 127.4, 126.1, 123.3, 70.2, 38.5, 28.0, 22.3, 13.8; high resolution mass spectrum ( $\text{ES}^-$ )  $m/z$  320.1049 [(M+Cl) $^-$ ]; calcd for  $\text{C}_{17}\text{H}_{19}\text{NO}_3\text{Cl}$ : 320.1053].

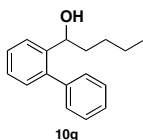

**Compound 10g.** Using conditions similar to those used for **10a**, *o*-TMS benzaldehyde **10** (123.1 mg, 0.69 mmol, 1.0 equiv.) afforded **10g** (96.1 mg, 0.40 mmol, 58% yield) as a colorless oil after flash chromatography (diethyl ether/hexane = 1/10), and preparative thin layer chromatography (ethyl acetate/benzene = 1/30).  $R_f$  0.32 (hexane/diethyl ether = 5/1); IR (film) 3360 (s), 3059 (m), 3024 (m), 2955 (s), 2931 (s), 2860 (m), 1953 (w), 1817 (w), 1598 (w), 1476 (s), 1463 (s), 1453 (s), 1190 (w), 1045 (s), 1006 (s)  $\text{cm}^{-1}$ ;  $^1\text{H}$  NMR (500 MHz,  $\text{CDCl}_3$ )  $\delta$  7.63 (d,  $J = 7.5$  Hz, 1H), 7.42 (t,  $J = 7.5$  Hz, 3H), 7.38-7.35 (m, 1H), 7.34-7.30 (m, 3H), 7.22 (dd,  $J = 7.5$  and 1.0 Hz, 1H), 4.87 (dd,  $J = 8.0$  and 5.0 Hz, 1H), 1.75-1.65 (m, 3H), 1.30-1.13 (m, 4H), 0.81 (t,  $J = 7.0$  Hz, 3H);  $^{13}\text{C}$  NMR (125 MHz,  $\text{CDCl}_3$ )  $\delta$  142.2, 141.0, 140.8, 129.9, 129.3, 128.1, 127.9, 127.03, 127.02, 125.7, 70.3, 38.4, 28.1, 22.3, 13.9; high resolution mass spectrum ( $\text{ES}^+$ )  $m/z$  263.1401 [(M+Na) $^+$ ]; calcd for  $\text{C}_{17}\text{H}_{20}\text{ONa}$ : 263.1412].

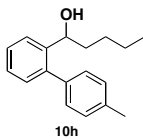

**Compound 10h.** Using conditions similar to those used for **10a**, *o*-TMS benzaldehyde **10** (115.5 mg, 0.65 mmol, 1.0 equiv.) afforded **10h** (83.9 mg, 0.33 mmol, 50% yield) as a colorless oil after flash chromatography (diethyl ether/hexane = 1/10), and preparative thin layer chromatography (ethyl acetate/benzene = 1/30).  $R_f$  0.3 (hexane/diethyl ether = 5/1); IR (film) 3361 (m), 3056 (w), 3023 (w), 2955 (s), 2929 (s), 2861 (m), 1515 (w), 1480 (m), 1448 (m), 1188 (w), 1004 (m)  $\text{cm}^{-1}$ ;

$^1\text{H}$  NMR (500 MHz,  $\text{CDCl}_3$ )  $\delta$  7.62 (dd,  $J = 8.0$  and  $1.5$  Hz, 1H), 7.40 (ddd,  $J = 7.5$ ,  $7.5$  and  $1.5$  Hz, 1H), 7.31 (ddd,  $J = 7.5$ ,  $7.5$  and  $1.5$  Hz, 1H), 7.24-7.19 (m, 5H), 4.80 (dd,  $J = 8.0$  and  $5.5$  Hz, 1H), 2.42 (s, 3H), 1.79 (br, 1H), 1.78-1.64 (m, 2H), 1.32-1.14 (m, 4H), 0.83 (t,  $J = 7.0$  Hz, 3H);  $^{13}\text{C}$  NMR (125 MHz,  $\text{CDCl}_3$ )  $\delta$  142.3, 140.7, 138.0, 136.6, 130.0, 129.2, 128.8, 127.7, 127.0, 125.7, 70.3, 38.4, 28.1, 22.4, 21.1, 13.9; high resolution mass spectrum ( $\text{ES}^+$ )  $m/z$  277.1571 [(M+Na) $^+$ ]; calcd for  $\text{C}_{18}\text{H}_{22}\text{ONa}$ : 277.1568].

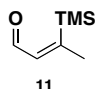

**Compound 11.** To a solution of (Z)-3-(trimethylsilyl)but-2-en-1-ol **17** (1.02 g, 7.07 mmol, 1.0 equiv.) in  $\text{Et}_2\text{O}$  (141 mL, 0.05 M) was added  $\text{MnO}_2$  (6.15 g, 70.7 mmol, 10 equiv.). After being stirred for 14 h at room temperature, the solids were filtered through celite, and rinsed with a small quantity of  $\text{Et}_2\text{O}$ . The filtrates were concentrated *in vacuo* at  $0^\circ\text{C}$  for 4 h to provide **11** (0.86 g, 6.08 mmol, 86% yield,  $Z:E = >97:<3$  by  $^1\text{H}$  NMR) as a pale yellow liquid. Without further purification, **11** was used in ARC reactions.  $R_f$  0.7 (hexane/diethyl ether = 5/1); IR (film) 2958 (s), 2856 (m), 2738 (w), 1728 (m), 1684 (s), 1582 (w), 1253 (s), 1075 (m)  $\text{cm}^{-1}$ ;  $^1\text{H}$  NMR (500 MHz,  $\text{CDCl}_3$ )  $\delta$  9.84 (d,  $J = 8.5$  Hz, 1H), 6.43 (ddd,  $J = 8.5$ ,  $3.0$  and  $1.5$  Hz, 1H), 2.04 (d,  $J = 1.5$  Hz, 3H), 0.25 (s, 9H);  $^{13}\text{C}$  NMR (125 MHz,  $\text{CDCl}_3$ )  $\delta$  192.5, 169.4, 142.1, 26.2, 0.2; high resolution mass spectrum ( $\text{CI}^+$ )  $m/z$  127.0581 [(M- $\text{CH}_3$ ) $^+$ ]; calcd for  $\text{C}_6\text{H}_{11}\text{OSi}$ : 127.0579].

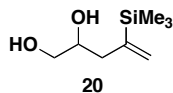

**Compound 20.** To a solution of Mg turnings (0.54 g, 22.4 mmol, 3.0 equiv.) in THF (100 mL) was added few drops of 1,2-dibromoethane as initiator. A solution of  $\alpha$ -bromovinylsilane (2.30 mL, 14.9 mmol, 2.0 equiv.) in THF (10 mL) was slowly added at room temperature over 30 min. After the addition was complete, the reaction mixture was vigorously stirred at room temperature for 1 h. The resulted solution was then cooled to  $-35^\circ\text{C}$ , and then  $\text{CuI}$  (0.142 g, 0.746 mmol, 0.1 equiv.) was added. After stirring for 30 min at  $-35^\circ\text{C}$ , a solution of epoxide **18** (2.36 g, 7.46 mmol, 1.0 equiv.) in THF (20 mL) was added over 10 min. The reaction mixture was then warmed to  $0^\circ\text{C}$ .

°C over 2 h. A saturated aqueous  $\text{NH}_4\text{Cl}$  solution was added, and the resulting mixture was extracted with ethyl acetate. The combined organic layers were washed with brine, dried over  $\text{MgSO}_4$ , filtered and concentrated *in vacuo*. The crude product was then dissolved in MeOH (10 mL) and treated with TsOH (0.142 g, 0.746 mmol, 0.1 equiv.) at room temperature. After being stirred for 5 h,  $\text{K}_2\text{CO}_3$  (0.103 g, 0.746 mmol, 0.1 equiv.) was added to neutralize the acid. After stirring for 30 min, the reaction mixture was filtered through celite and concentrated *in vacuo*. Flash chromatography (ethyl acetate/hexane = 1/2) afforded **20** (1.05 g, 6.04 mmol, 81% yield, 2 steps) as a pale yellow oil.  $R_f$  0.15 (hexane/ethyl acetate = 2/1); Data is consistent with that reported in the literature.<sup>1</sup>

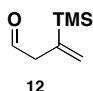

**Compound 12.** To a solution of 4-(trimethylsilyl)pent-4-ene-1,2-diol **20** (1.90 g, 10.9 mmol, 1.0 equiv.) in EtOH (13 mL) was added  $\text{NaIO}_4$  (4.66 g, 21.8 mmol, 2.0 equiv.) in  $\text{H}_2\text{O}$  (19 mL) at 0 °C. After being stirred for 1 h at room temperature,  $\text{H}_2\text{O}$  (20 mL) was added. The resulting mixture was then extracted with  $\text{Et}_2\text{O}$  (10 mL x 3), and the combined organic layers were washed with brine, dried over  $\text{MgSO}_4$ , filtered and concentrated *in vacuo* at 0 °C for 4 h to provide **12** (1.41 g, 9.91 mmol, 91% yield) as a pale yellow liquid. Without further purification, **12** was used in ARC reactions.  $R_f$  0.7 (hexane/diethyl ether = 5/1); IR (film) 3053 (w), 2956 (s), 2898 (w), 2814 (w), 2718 (w), 1724 (s), 1417 (m), 1251 (s), 841 (s)  $\text{cm}^{-1}$ ;  $^1\text{H}$  NMR (500 MHz,  $\text{CDCl}_3$ )  $\delta$  9.59 (t,  $J = 2.5$  Hz, 1H), 5.72 (d,  $J = 2.5$  Hz, 1H), 5.63 (d,  $J = 2.5$  Hz, 1H), 3.20-3.19 (m, 2H), 0.10 (s, 9H);  $^{13}\text{C}$  NMR (125 MHz,  $\text{CDCl}_3$ )  $\delta$  200.6, 143.0, 129.9, 50.7, -1.9; high resolution mass spectrum ( $\text{Cl}^+$ )  $m/z$  143.0885 [( $\text{M}+\text{H}$ ) $^+$ ; calcd for  $\text{C}_7\text{H}_{15}\text{OSi}$ : 143.0892].

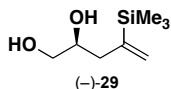

**Compound (-)-29.** To a solution of Mg turnings (1.3 g, 54.1 mmol, 4.0 equiv.) in THF (100 mL) was added few drops of 1,2-dibromoethane as initiator. A solution of  $\alpha$ -bromovinylsilane (4.16

<sup>1</sup> Landais, Y.; Planchenault. *Tetrahedron* **1995**, *51*, 12097.



mL, 27.0 mmol, 2.0 equiv.) in THF (10 mL) was slowly added at room temperature over 30 min. After the addition was complete, the reaction mixture was vigorously stirred at room temperature for 1 h. The resulted solution was then cooled to  $-40\text{ }^{\circ}\text{C}$ , and then CuI (0.257 g, 1.35 mmol, 0.1 equiv.) was added. After stirring for 30 min at  $-40\text{ }^{\circ}\text{C}$ , a solution of epoxide (+)-**28** (2.54 g, 13.5 mmol, 1.0 equiv.) in THF (20 mL) was added over 10 min. The reaction mixture was then warmed to  $0\text{ }^{\circ}\text{C}$  over 5 h, before being allowed to further warm to room temperature and stir overnight. A saturated aqueous  $\text{NH}_4\text{Cl}$  solution was added, and the resulting mixture was extracted with ethyl acetate. The combined organic layers were washed with brine, dried over  $\text{MgSO}_4$ , filtered and concentrated *in vacuo*. The crude product was then dissolved in MeOH (10 mL) and treated with TsOH (0.256 g, 0.135 mmol, 0.1 equiv.) at room temperature. After being stirred for 1 h,  $\text{K}_2\text{CO}_3$  (0.186 g, 0.135 mmol, 0.1 equiv.) was added to neutralize the acid. After stirring for 30 min, the reaction mixture was filtered through celite and concentrated *in vacuo*. Flash chromatography (ethyl acetate/hexane = 1/2) afforded (–)-**29** (1.96 g, 11.2 mmol, 83% yield, 2 steps) as a pale yellow oil.  $R_f$  0.15 (hexane/ethyl acetate = 2/1);  $[\alpha]_D^{18}$   $-2.02$  ( $c$  1.0,  $\text{CHCl}_3$ ); IR (film) 3375 (s), 3049 (w), 2954 (s), 1651 (w), 1409 (m), 1249 (s), 1031 (m)  $\text{cm}^{-1}$ ;  $^1\text{H}$  NMR (500 MHz,  $\text{CDCl}_3$ )  $\delta$  5.68 (d,  $J = 3.0$  Hz, 1H), 5.49 (d,  $J = 3.0$  Hz, 1H), 3.83-3.78 (m, 1H), 3.67 (dd,  $J = 11.0$  and 3.0 Hz, 1H), 3.46 (dd,  $J = 11.0$  and 7.0 Hz, 1H), 2.39 (br, 2H), 2.35 (dd,  $J = 14.5$  and 4.5 Hz, 1H), 2.27 (dd,  $J = 14.0$  and 8.5 Hz, 1H), 0.11 (s, 9H);  $^{13}\text{C}$  NMR (125 MHz,  $\text{CDCl}_3$ )  $\delta$  148.5, 127.8, 70.3, 66.4, 40.2, -1.4; high resolution mass spectrum ( $\text{ES}^+$ )  $m/z$  197.0973  $[(\text{M}+\text{Na})^+]$ ; calcd for  $\text{C}_8\text{H}_{18}\text{O}_2\text{NaSi}$ : 197.0974].

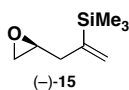

**Compound (–)-15.** To a stirred suspension of NaH (0.75 g, 31.4 mmol, 3.3 equiv.) in THF (20 mL) at  $0\text{ }^{\circ}\text{C}$  was added a solution of diol (–)-**29** (1.83 g, 10.5 mmol, 1.1 equiv.) in THF (10 mL) via cannula, followed by THF rinse (3 mL). After being stirred for 1 h at  $0\text{ }^{\circ}\text{C}$ , a solution of trisylimidazole (3.18 g, 9.5 mmol, 1.0 equiv.) in THF (20 mL) to the white suspension via syringe pump over 2 h. After an additional 1 h, the white slurry was carefully quenched with sat.  $\text{NH}_4\text{Cl}$

and then diluted with H<sub>2</sub>O. The aqueous phase was washed with Et<sub>2</sub>O (30 mL x 3), and the combined organic layers were washed with sat. NaHCO<sub>3</sub>, dried over MgSO<sub>4</sub>, and concentrated *in vacuo*. Flash chromatography (diethyl ether/hexane = 1/10) afforded (–)-**15** (1.44 g, 9.21 mmol, 97% yield) as a pale yellow liquid. R<sub>f</sub> 0.75 (hexane/diethyl ether = 5/1); [α]<sup>18</sup><sub>D</sub> –5.95 (*c* 1.0, CHCl<sub>3</sub>); IR (film) 3048 (w), 2955 (s), 2925 (s), 2855 (s), 1601 (w), 1461 (m), 1249 (s), 1180 (w) cm<sup>-1</sup>; <sup>1</sup>H NMR (500 MHz, CDCl<sub>3</sub>) δ 5.71 (d, *J* = 2.5 Hz, 1H), 5.43 (d, *J* = 2.5 Hz, 1H), 2.99-2.96 (m, 1H), 2.76 (t, *J* = 4.5 Hz, 1H), 2.47 (dd, *J* = 5.0 and 2.5 Hz, 1H), 2.40 (dd, *J* = 15.5 and 6.0 Hz, 1H), 2.28 (dd, *J* = 15.5 and 6.0 Hz, 1H), 0.09 (s, 9H); <sup>13</sup>C NMR (125 MHz, CDCl<sub>3</sub>) δ 147.9, 126.4, 51.6, 47.1, 38.8, -1.8; high resolution mass spectrum (Cl<sup>+</sup>) *m/z* 141.0732 [(M-CH<sub>3</sub>)<sup>+</sup>; calcd for C<sub>7</sub>H<sub>13</sub>OSi: 141.0736].

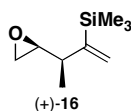

**Compound (+)-16.** Using conditions similar to those used for (–)-**15**, trisylimidazole (0.43 g, 1.28 mmol, 1.0 equiv.) afforded (+)-**16** (200.9 mg, 1.18 mmol, 92% yield) as a pale yellow liquid after flash chromatography (diethyl ether/pentane = 1/10). R<sub>f</sub> 0.45 (pentane/diethyl ether = 10/1); [α]<sup>18</sup><sub>D</sub> +16.6 (*c* 1.2, CDCl<sub>3</sub>); IR (film) 3050 (w), 2959 (s), 2926 (m), 2900 (m), 1599 (w), 1456 (m), 1408 (s), 1249 (s) cm<sup>-1</sup>; <sup>1</sup>H NMR (500 MHz, CDCl<sub>3</sub>) δ 5.74 (d, *J* = 2.0 Hz, 1H), 5.48 (d, *J* = 2.5 Hz, 1H), 2.87 (ddd, *J* = 7.5, 3.5 and 3.0 Hz, 1H), 2.75 (dd, *J* = 5.0 and 4.0 Hz, 1H), 2.50 (dd, *J* = 5.0 and 2.0 Hz, 1H), 2.06 (m, 1H), 1.19 (d, *J* = 7.0 Hz, 3H), 0.11 (s, 9H); <sup>13</sup>C NMR (125 MHz, CDCl<sub>3</sub>) δ 154.0, 125.3, 56.8, 47.4, 41.7, 18.4, -1.0; high resolution mass spectrum (ES<sup>+</sup>) *m/z* 171.1206 [(M+H)<sup>+</sup>; calcd for C<sub>9</sub>H<sub>19</sub>OSi: 171.1206].

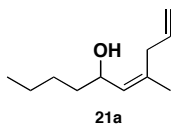

**Compound 21a.** To a solution of linchpin **11** (65.9 mg, 0.46 mmol, 1.0 equiv.) in Et<sub>2</sub>O (1 mL) at –78 °C was added *n*-BuLi (2.2M in hexane, 0.25 mL, 0.55 mmol, 1.2 equiv.) dropwise. After being stirred for 30 min, the resulting solution was added to a mixture of CuI (105.8 mg, 0.55 mmol, 1.2 equiv.) in HMPA/THF (1 mL/1 mL) via cannula at 0 °C. The resulting solution was warmed to

room temperature. After stirring for 30 min at room temperature, allyl bromide (0.08 mL, 0.93 mmol, 2.0 equiv.) was added. After 2 h at room temperature, 3 mL of 1N HCl was added. After 10 min, a saturated aqueous NH<sub>4</sub>Cl (3 mL) solution was added, and the resulting mixture was extracted with Et<sub>2</sub>O (10 mL x 2) and CH<sub>2</sub>Cl<sub>2</sub> (10 mL x 2). The combined organic layers were washed with brine, dried over MgSO<sub>4</sub>, filtered and concentrated *in vacuo*. Flash chromatography (diethyl ether/hexane = 1/15) afforded **21a** (50.3 mg, 0.30 mmol, 65% yield) as a colorless oil. R<sub>f</sub> 0.2 (hexane/diethyl ether = 5/1); IR (film) 3346 (m), 3063 (w), 2957 (s), 2929 (s), 2858 (s), 1670 (w), 1636 (m), 1029 (m) cm<sup>-1</sup>; <sup>1</sup>H NMR (500 MHz, CDCl<sub>3</sub>) δ 5.80-5.72 (m, 1H), 5.24 (d, *J* = 9.0 Hz, 1H), 5.07-5.00 (m, 2H), 4.33 (ddd, *J* = 8.5, 6.5 and 6.5 Hz, 1H), 2.83 (ddd, *J* = 25.5, 15.0 and 6.5 Hz, 2H), 1.71 (d, *J* = 1.5 Hz, 3H), 1.61-1.54 (m, 1H), 1.47 (br, 1H), 1.45-1.38 (m, 1H), 1.35-1.25 (m, 4H), 0.89 (t, *J* = 7.0 Hz, 3H); <sup>13</sup>C NMR (125 MHz, CDCl<sub>3</sub>) δ 136.5, 135.9, 129.6, 115.6, 68.3, 37.3, 36.7, 27.6, 23.4, 22.6, 14.0; high resolution mass spectrum (Cl<sup>+</sup>) *m/z* 151.1491 [(M-OH)<sup>+</sup>; calcd for C<sub>11</sub>H<sub>19</sub>: 151.1487].

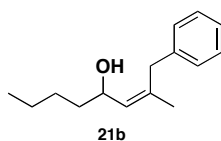

**Compound 21b.** Using conditions similar to those used for **21a**, linchpin **11** (68.2 mg, 0.48 mmol, 1.0 equiv.) afforded **21b** (68.8 mg, 0.32 mmol, 66% yield) as a colorless oil after flash chromatography (diethyl ether/hexane = 1/10). R<sub>f</sub> 0.22 (hexane/diethyl ether = 5/1); IR (film) 3437 (m), 3027 (w), 2956 (s), 2928 (s), 1666 (w), 1601 (w), 1495 (m), 1452 (m), 1031 (m), 1003 (m) cm<sup>-1</sup>; <sup>1</sup>H NMR (500 MHz, CDCl<sub>3</sub>) δ 7.31-7.28 (m, 2H), 7.22-7.18 (m, 3H), 5.36 (d, *J* = 9.0 Hz, 1H), 4.51 (ddd, *J* = 8.5, 6.5 and 6.5 Hz, 1H), 3.45 (s, 2H), 1.67 (d, *J* = 1.0 Hz, 3H), 1.66-1.61 (m, 1H), 1.59-1.48 (m, 2H), 1.41-1.30 (m, 4H), 0.92 (t, *J* = 7.0 Hz, 3H); <sup>13</sup>C NMR (125 MHz, CDCl<sub>3</sub>) δ 139.4, 137.2, 130.0, 128.5, 128.4, 126.0, 68.4, 38.2, 37.6, 27.7, 23.4, 22.6, 14.0; high resolution mass spectrum (ES<sup>+</sup>) *m/z* 241.1558 [(M+Na)<sup>+</sup>; calcd for C<sub>15</sub>H<sub>22</sub>ONa: 241.1568].

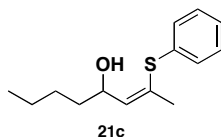

**Compound 21c.** Using conditions similar to those used for **21a**, linchpin **11** (65.9 mg, 0.46 mmol, 1.0 equiv.) afforded **21c** (74.7 mg, 0.31 mmol, 68% yield) as a colorless oil after flash chromatography (diethyl ether/hexane = 1/10).  $R_f$  0.18 (hexane/diethyl ether = 5/1); IR (film) 3347 (m), 3026 (w), 2956 (s), 2927 (s), 2858 (s), 1633 (w), 1584 (m), 1478 (m), 1439 (m), 1080 (m), 1024 (m)  $\text{cm}^{-1}$ ;  $^1\text{H}$  NMR (500 MHz,  $\text{CDCl}_3$ )  $\delta$  7.35-7.33 (m, 2H), 7.31-7.28 (m, 2H), 7.25-7.22 (m, 1H), 5.78 (dd,  $J = 4.0$  and  $1.0$  Hz, 1H), 4.76 (app dd,  $J = 14.5$  and  $7.0$  Hz, 1H), 1.90 (d,  $J = 1.2$  Hz, 3H), 1.85 (br, 1H), 1.69-1.62 (m, 1H), 1.56-1.49 (m, 1H), 1.41-1.29 (m, 4H), 0.92 (t,  $J = 6.9$  Hz, 3H);  $^{13}\text{C}$  NMR (125 MHz,  $\text{CDCl}_3$ )  $\delta$  136.9, 133.6, 131.8, 131.1, 128.9, 126.9, 69.7, 36.8, 27.5, 24.1, 22.6, 14.0; high resolution mass spectrum ( $\text{ES}^-$ )  $m/z$  235.1154 [(M-H) $^-$ ]; calcd for  $\text{C}_{14}\text{H}_{19}\text{OS}$ : 235.1157].

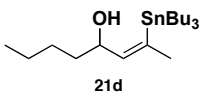

**Compound 21d.** Using conditions similar to those used for **21a**, linchpin **11** (66.9 mg, 0.47 mmol, 1.0 equiv.) afforded **21d** (124.2 mg, 0.30 mmol, 63% yield) as a colorless oil after flash chromatography (diethyl ether/hexane = 1/40).  $R_f$  0.7 (hexane/diethyl ether = 5/1); IR (film) 3389 (m), 2956 (s), 2927 (s), 2855 (s), 1461 (m), 1377 (m), 1073 (m)  $\text{cm}^{-1}$ ;  $^1\text{H}$  NMR (500 MHz,  $\text{CDCl}_3$ )  $\delta$  6.05 (dd,  $J_{\text{H-H}} = 8.5$  and  $1.5$  Hz,  $J_{\text{H-Sn}} = 126.6$  Hz, 1H), 3.87-3.82 (m, 1H), 1.92 (d,  $J_{\text{H-H}} = 1.5$  Hz,  $J_{\text{H-Sn}} = 19.8$  Hz, 3H), 1.61-1.43 (m, 8H), 1.38-1.26 (m, 11H), 0.95-0.91 (m, 3H), 0.89 (t,  $J = 7.0$  Hz, 15H);  $^{13}\text{C}$  NMR (125 MHz,  $\text{CDCl}_3$ )  $\delta$  143.6, 143.1, 74.9, 37.3, 29.3 (t,  $J = 9.8$  Hz), 28.0, 27.6 (t,  $J = 29.0$  Hz), 27.1, 22.9, 14.2, 13.8, 10.5 (t,  $J = 157.7$  Hz); high resolution mass spectrum ( $\text{ES}^+$ )  $m/z$  441.2156 [(M+Na) $^+$ ]; calcd for  $\text{C}_{20}\text{H}_{42}\text{OSnNa}$ : 441.2155].

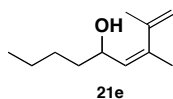

**Compound 21e.** Using conditions similar to those used for **10a**, linchpin **11** (69.3 mg, 0.49 mmol, 1.0 equiv.) afforded **21e** (43.3 mg, 0.26 mmol, 53% yield) as a pale yellow oil after flash chromatography (diethyl ether/hexane = 1/10).  $R_f$  0.24 (hexane/diethyl ether = 5/1); IR (film) 3347 (m), 3080 (w), 2958 (s), 2930 (s), 2859 (s), 1634 (m), 1445 (m), 1028 (m)  $\text{cm}^{-1}$ ;  $^1\text{H}$  NMR (500

MHz, CDCl<sub>3</sub>) δ 5.16 (dd, *J* = 9.0 and 1.5 Hz, 1H), 4.90 (dd, *J* = 2.5 and 1.5 Hz, 1H), 4.70 (dd, *J* = 2.5 and 1.0 Hz, 1H), 4.30 (ddd, *J* = 8.5, 6.5 and 6.5 Hz, 1H), 1.80 (t, *J* = 1.5 Hz, 3H), 1.79 (d, *J* = 1.5 Hz, 3H), 1.59-1.52 (m, 1H), 1.48 (br, 1H), 1.45-1.39 (m, 1H), 1.33-1.24 (m, 4H), 0.88 (t, *J* = 7.0 Hz, 3H); <sup>13</sup>C NMR (125 MHz, CDCl<sub>3</sub>) δ 144.9, 141.5, 128.7, 112.8, 69.1, 37.3, 27.7, 23.0, 22.6, 22.2, 14.0; high resolution mass spectrum (Cl<sup>+</sup>) *m/z* 168.1514 [(M)<sup>+</sup>; calcd for C<sub>11</sub>H<sub>20</sub>O: 168.1514].

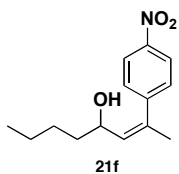

**Compound 21f.** Using conditions similar to those used for **10a**, linchpin **11** (69.7 mg, 0.49 mmol, 1.0 equiv.) afforded **21f** (63.9 mg, 0.26 mmol, 52% yield) as a pale yellow oil after flash chromatography (ethyl acetate/hexane = 1/9). *R<sub>f</sub>* 0.15 (hexane/ethyl acetate = 5/1); IR (film) 3365 (m), 2956 (s), 2930 (s), 2858 (m), 1597 (m), 1520 (s), 1346 (s), 1031 (w), 1013 (w) cm<sup>-1</sup>; <sup>1</sup>H NMR (500 MHz, CDCl<sub>3</sub>) δ 8.22-8.19 (m, 2H), 7.40-7.37 (m, 2H), 5.58 (dd, *J* = 9.5 and 1.5 Hz, 1H), 3.96 (ddd, *J* = 8.5, 6.5 and 6.5 Hz, 1H), 2.08 (d, *J* = 1.5 Hz, 3H), 1.63 (br, 1H), 1.60-1.54 (m, 1H), 1.50-1.43 (m, 1H), 1.28-1.20 (m, 4H), 0.86 (t, *J* = 7.0 Hz, 3H); <sup>13</sup>C NMR (125 MHz, CDCl<sub>3</sub>) δ 148.2, 146.9, 137.6, 132.1, 128.7, 123.5, 69.1, 37.5, 27.5, 25.2, 22.5, 14.0; high resolution mass spectrum (ES<sup>-</sup>) *m/z* 248.1298 [(M-H)<sup>-</sup>; calcd for C<sub>14</sub>H<sub>18</sub>NO<sub>3</sub>: 248.1287].

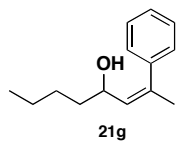

**Compound 21g.** Using conditions similar to those used for **10a**, linchpin **11** (67.8 mg, 0.48 mmol, 1.0 equiv.) afforded **21g** (52.5 mg, 0.26 mmol, 54% yield) as a pale yellow oil after flash chromatography (ethyl acetate/hexane = 1/9). *R<sub>f</sub>* 0.28 (hexane/ethyl acetate = 5/1); IR (film) 3347 (m), 3023 (w), 2959 (s), 2929 (s), 2858 (s), 1658 (w), 1600 (w), 1464 (m), 1442 (m), 1261 (s), 1026 (s) cm<sup>-1</sup>; <sup>1</sup>H NMR (500 MHz, CDCl<sub>3</sub>) δ 7.37-7.34 (m, 2H), 7.30-7.26 (m, 1H), 7.22-7.21 (m, 2H), 5.49 (dd, *J* = 9.0 and 1.0 Hz, 1H), 4.08 (ddd, *J* = 8.5, 6.5 and 6.5 Hz, 1H), 2.07 (d, *J* = 1.0

Hz, 3H), 1.61-1.54 (m, 2H), 1.51-1.45 (m, 1H), 1.34-1.21 (m, 4H), 0.88 (t,  $J = 7.0$  Hz, 3H);  $^{13}\text{C}$  NMR (125 MHz,  $\text{CDCl}_3$ )  $\delta$  141.3, 139.5, 130.2, 128.1, 127.7, 126.9, 69.1, 37.3, 27.5, 25.7, 22.6, 14.0; high resolution mass spectrum ( $\text{Cl}^+$ )  $m/z$  204.1513 [ $(\text{M})^+$ ; calcd for  $\text{C}_{14}\text{H}_{20}\text{O}$ : 204.1514].

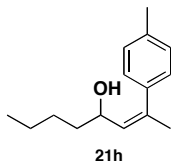

**Compound 21h.** Using conditions similar to those used for **10a**, linchpin **11** (63.3 mg, 0.44 mmol, 1.0 equiv.) afforded **21h** (59.5 mg, 0.27 mmol, 61% yield) as a pale yellow oil after flash chromatography (diethyl ether/hexane = 1/10).  $R_f$  0.28 (hexane/diethyl ether = 5/1); IR (film) 3345 (m), 3023 (w), 2957 (s), 2928 (s), 2858 (s), 1657 (w), 1568 (w), 1511 (m), 1444 (m), 1031 (m)  $\text{cm}^{-1}$ ;  $^1\text{H}$  NMR (500 MHz,  $\text{CDCl}_3$ )  $\delta$  7.15 (d,  $J = 8.0$  Hz, 2H), 7.10 (d,  $J = 8.0$  Hz, 2H), 5.45 (dd,  $J = 9.5$  and 1.5 Hz, 1H), 4.09 (ddd,  $J = 9.0, 6.5$  and 6.5 Hz, 1H), 2.36 (s, 3H), 2.04 (d,  $J = 1.5$  Hz, 3H), 1.59-1.52 (m, 1H), 1.49-1.46 (m, 1H), 1.41 (br, 1H), 1.31-1.22 (m, 4H), 0.87 (t,  $J = 7.0$  Hz, 3H);  $^{13}\text{C}$  NMR (125 MHz,  $\text{CDCl}_3$ )  $\delta$  139.5, 138.3, 136.6, 129.9, 128.8, 127.5, 69.2, 37.4, 27.6, 25.8, 22.6, 21.1, 14.0; high resolution mass spectrum ( $\text{Cl}^+$ )  $m/z$  218.1663 [ $(\text{M})^+$ ; calcd for  $\text{C}_{15}\text{H}_{22}\text{O}$ : 218.1670].

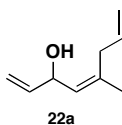

**Compound 22a.** To a solution of linchpin **11** (67.9 mg, 0.48 mmol, 1.0 equiv.) in  $\text{Et}_2\text{O}$  (1 mL) at  $-78$   $^\circ\text{C}$  was added vinyl lithium<sup>2</sup> (1.12 M in THF, 0.51 mL, 0.57 mmol, 1.2 equiv.) dropwise. After stirring for 30 min, the resulting solution was added to a mixture of  $\text{CuI}$  (108.5 mg, 0.57 mmol, 1.2 equiv.) in  $\text{HMPA/THF}$  (1 mL/1 mL) via cannula at  $0$   $^\circ\text{C}$ . The resulting solution was warmed to room temperature. After being stirred for 30 min at room temperature, allyl bromide (0.08 mL, 0.96 mmol, 2.0 equiv.) was added. After being stirred for 2 h at room temperature, TBAF (1.92 mL, 1.92 mmol, 4.0 equiv.) was added. After 1 h, the resulting mixture was filtered through

<sup>2</sup> Uozumi, Y.; Tsuji, H.; Hayashi, T. *J. Org. Chem.* **1998**, *63*, 6137.

triethylamine-buffered silica gel (2.5 v/v). Flash chromatography on triethylamine-buffered silica gel (diethyl ether/hexane = 1/10), afforded **22a** (41.2 mg, 0.30 mmol, 62% yield) as a pale yellow oil.  $R_f$  0.24 (hexane/diethyl ether = 5/1); IR (film) 3362 (s), 3080 (m), 2925 (s), 1638 (m), 1442 (m), 1250 (m), 1110 (m)  $\text{cm}^{-1}$ ;  $^1\text{H}$  NMR (500 MHz,  $\text{C}_6\text{D}_6$ )  $\delta$  5.89-5.82 (m, 1H), 5.68-5.60 (m, 1H), 5.25-5.20 (m, 2H), 4.99-4.93 (m, 3H), 4.74 (dd,  $J$  = 8.5 and 5.5 Hz, 1H), 2.65 (ddd,  $J$  = 36.5, 14.5 and 6.5 Hz, 2H), 1.56 (d,  $J$  = 1.5 Hz, 3H), 1.30 (br, 1H);  $^{13}\text{C}$  NMR (125 MHz,  $\text{C}_6\text{D}_6$ )  $\delta$  140.9, 135.9, 128.6, 127.8, 115.8, 113.5, 69.5, 36.9, 23.4; high resolution mass spectrum ( $\text{CI}^+$ )  $m/z$  120.1020 [(M-OH) $^+$ ; calcd for  $\text{C}_9\text{H}_{13}$ : 121.1017].

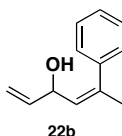

**Compound 22b.** To a solution of linchpin **11** (68.4 mg, 0.48 mmol, 1.0 equiv.) in  $\text{Et}_2\text{O}$  (1 mL) at  $-78$   $^\circ\text{C}$  was added vinyl lithium $^1$  (1.12 M in THF, 0.52 mL, 0.58 mmol, 1.2 equiv.) dropwise. After stirring for 30 min, the resulting solution was added to a mixture of  $\text{CuI}$  (109.8 mg, 0.58 mmol, 1.2 equiv.) in HMPA/THF (1 mL/1 mL) via cannula at  $0$   $^\circ\text{C}$ . The resulting solution was warmed to room temperature. After being stirred for 30 min at room temperature, phenyl iodide (0.11 mL, 0.96 mmol, 2.0 equiv.) and  $\text{Pd}(\text{PPh}_3)_4$  (16.7 mg, 0.014 mmol, 0.03 equiv.) in THF (1 mL) were added. After being stirred for 6 h at room temperature, TBAF (1.92 mL, 1.92 mmol, 4.0 equiv.) was added. After 1 h, the resulting mixture was filtered through triethylamine-buffered silica gel (2.5 v/v). Flash chromatography on triethylamine-buffered silica gel (diethyl ether/hexane = 1/10) afforded **22b** (37.8 mg, 0.22 mmol, 45% yield) as a pale yellow oil.  $R_f$  0.28 (hexane/diethyl ether = 5/1); IR (film) 3340 (s), 3079 (w), 3057 (w), 3023 (w), 2970 (s), 2916 (s), 1643 (w), 1493 (w), 1438 (m), 1115 (w), 987 (s)  $\text{cm}^{-1}$ ;  $^1\text{H}$  NMR (500 MHz,  $\text{C}_6\text{D}_6$ )  $\delta$  7.29-7.22 (m, 4H), 7.18-7.15 (m, 1H), 6.01-5.94 (m, 1H), 5.55 (dd,  $J$  = 9.5 and 1.5 Hz, 1H), 5.25 (ddd,  $J$  = 3.0, 1.5 and 1.5 Hz, 1H), 5.05 (ddd,  $J$  = 3.0, 1.5 and 1.5 Hz, 1H), 4.75 (dd,  $J$  = 9.0 and 5.5 Hz, 1H), 1.98 (d,  $J$  = 1.5 Hz, 3H), 1.53 (br, 1H);  $^{13}\text{C}$  NMR (125 MHz,  $\text{C}_6\text{D}_6$ )  $\delta$  141.5, 140.9, 139.1, 129.1, 128.4, 127.8, 127.3, 113.9,

70.3, 25.5; high resolution mass spectrum (ES<sup>+</sup>)  $m/z$  197.0941 [(M+Na)<sup>+</sup>; calcd for C<sub>12</sub>H<sub>14</sub>ONa: 197.0942].

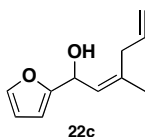

**Compound 22c.** Using conditions similar to those used for **22a**, linchpin **11** (68.2 mg, 0.47 mmol, 1.0 equiv.) afforded **22c** (55.9 mg, 0.31 mmol, 65% yield) as a pale yellow oil after flash chromatography (diethyl ether/hexane = 1/10).  $R_f$  0.23 (hexane/diethyl ether = 5/1); IR (film) 3362 (s), 3078 (w), 2973 (s), 2917 (s), 2854 (m), 1721 (w), 1669 (w), 1636 (m), 1442 (m), 1146 (m), 1005 (s) cm<sup>-1</sup>; <sup>1</sup>H NMR (500 MHz, C<sub>6</sub>D<sub>6</sub>)  $\delta$  7.09 (dd,  $J$  = 1.5 and 1.0 Hz, 1H), 6.13 (d,  $J$  = 3.0 Hz, 1H), 6.07 (dd,  $J$  = 3.0 and 2.0 Hz, 1H), 5.68-5.59 (m, 2H), 5.37 (d,  $J$  = 8.5 Hz, 1H), 4.98-4.91 (m, 2H), 2.69 (ddd,  $J$  = 26.0, 14.5 and 6.5 Hz, 2H), 2.08 (br, 1H), 1.57 (d,  $J$  = 1.5 Hz, 3H); <sup>13</sup>C NMR (125 MHz, C<sub>6</sub>D<sub>6</sub>)  $\delta$  157.3, 142.0, 137.2, 135.8, 126.6, 115.9, 110.4, 105.9, 64.7, 36.9, 23.3; high resolution mass spectrum (Cl<sup>+</sup>)  $m/z$  161.0962 [(M-OH)<sup>+</sup>; calcd for C<sub>11</sub>H<sub>13</sub>O: 161.0966].

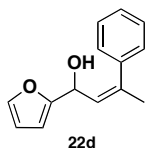

**Compound 22d.** Using conditions similar to those used for **22b**, linchpin **11** (67 mg, 0.47 mmol, 1.0 equiv.) afforded **22d** (50.4 mg, 0.24 mmol, 50% yield) as a pale yellow oil after flash chromatography (diethyl ether/hexane = 1/10).  $R_f$  0.23 (hexane/diethyl ether = 5/1); IR (film) 3393 (s), 3146 (w), 3056 (w), 3025 (w), 2916 (s), 1956 (w), 1892 (w), 1723 (w), 1656 (m), 1438 (s), 1146 (s), 999 (s) cm<sup>-1</sup>; <sup>1</sup>H NMR (500 MHz, C<sub>6</sub>D<sub>6</sub>)  $\delta$  7.22 (d,  $J$  = 7.0 Hz, 2H), 7.12 (t,  $J$  = 7.0 Hz, 2H), 7.07-7.05 (m, 2H), 6.05 (dd,  $J$  = 11.0 and 3.0 Hz, 2H), 5.83 (d,  $J$  = 9.5 Hz, 1H), 5.25 (d,  $J$  = 9.5 Hz, 1H), 1.88 (d,  $J$  = 1.5 Hz, 3H), 1.71 (br, 1H); <sup>13</sup>C NMR (125 MHz, C<sub>6</sub>D<sub>6</sub>)  $\delta$  157.2, 142.0, 141.1, 140.2, 128.5, 128.2, 127.5, 127.1, 110.4, 106.1, 65.6, 25.4; high resolution mass spectrum (ES<sup>+</sup>)  $m/z$  237.0893 [(M+Na)<sup>+</sup>; calcd for C<sub>14</sub>H<sub>14</sub>O<sub>2</sub>Na: 237.0891].



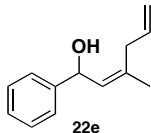

**Compound 22e.** Using conditions similar to those used for **22a**, linchpin **11** (68.5 mg, 0.48 mmol, 1.0 equiv.) afforded **22e** (60.1 mg, 0.32 mmol, 66% yield) as a pale yellow oil after flash chromatography (diethyl ether/hexane = 1/10).  $R_f$  0.24 (hexane/diethyl ether = 5/1); IR (film) 3341 (s), 3062 (m), 3029 (m), 2972 (s), 2914 (s), 1667 (w), 1636 (m), 1447 (s), 1068 (m), 997 (s)  $\text{cm}^{-1}$ ;  $^1\text{H}$  NMR (500 MHz,  $\text{C}_6\text{D}_6$ )  $\delta$  7.39 (d,  $J = 7.5$  Hz, 2H), 7.21-7.18 (m, 2H), 7.09 (t,  $J = 7.0$  Hz, 1H), 5.70-5.62 (m, 1H), 5.44 (d,  $J = 8.0$  Hz, 1H), 5.32 (d,  $J = 8.5$  Hz, 1H), 4.99-4.94 (m, 2H), 2.73 (ddd,  $J = 32.0, 15.0$  and  $6.5$  Hz, 2H), 1.78 (br, 1H), 1.55 (d,  $J = 1.5$  Hz, 3H);  $^{13}\text{C}$  NMR (125 MHz,  $\text{C}_6\text{D}_6$ )  $\delta$  145.4, 136.3, 136.0, 130.6, 128.9, 127.7, 126.7, 116.3, 70.8, 37.3, 23.7; high resolution mass spectrum ( $\text{ES}^+$ )  $m/z$  211.1100 [( $\text{M}+\text{Na}$ ) $^+$ ; calcd for  $\text{C}_{13}\text{H}_{16}\text{ONa}$ : 211.1099].

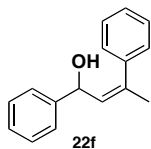

**Compound 22f.** Using conditions similar to those used for **22b**, linchpin **11** (68.5 mg, 0.48 mmol, 1.0 equiv.) afforded **22f** (54.9 mg, 0.25 mmol, 51% yield) as a pale yellow oil after flash chromatography (diethyl ether/hexane = 1/10).  $R_f$  0.28 (hexane/diethyl ether = 5/1); IR (film) 3328 (s), 3058 (s), 3027 (s), 2970 (s), 2912 (s), 1952 (w), 1884 (w), 1810 (w), 1653 (m), 1492 (s), 1447 (s), 998 (s)  $\text{cm}^{-1}$ ;  $^1\text{H}$  NMR (500 MHz,  $\text{C}_6\text{D}_6$ )  $\delta$  7.34 (d,  $J = 7.5$  Hz, 2H), 7.22-7.20 (m, 2H), 7.19-7.14 (m, 4H), 7.11-7.06 (m, 2H), 5.68 (dd,  $J = 9.0$  and  $1.0$  Hz, 1H), 5.22 (d,  $J = 9.5$  Hz, 1H), 1.87 (d,  $J = 1.0$  Hz, 3H), 1.76 (br, 1H);  $^{13}\text{C}$  NMR (125 MHz,  $\text{CDCl}_3$ )  $\delta$  143.8, 141.0, 139.7, 129.1, 128.5, 128.2, 127.8, 127.4, 127.2, 126.0, 71.3, 25.7; high resolution mass spectrum ( $\text{ES}^+$ )  $m/z$  247.1107 [( $\text{M}+\text{Na}$ ) $^+$ ; calcd for  $\text{C}_{16}\text{H}_{16}\text{ONa}$ : 247.1099].

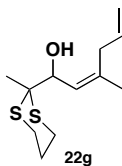

**Compound 22g.** Using conditions similar to those used for **21a**, linchpin **11** (66.5 mg, 0.46 mmol, 1.0 equiv.) afforded **22g** (66.1 mg, 0.27 mmol, 58% yield) as a pale yellow oil after flash chromatography (ethyl acetate/hexane = 1/15).  $R_f$  0.25 (hexane/diethyl ether = 5/1); IR (film) 3447 (s), 3051 (w), 2956 (s), 2915 (s), 1636 (m), 1442 (s), 1376 (s), 1276 (m), 1066 (s), 1013 (s)  $\text{cm}^{-1}$ ;  $^1\text{H}$  NMR (500 MHz,  $\text{CDCl}_3$ )  $\delta$  5.86-5.78 (m, 1H), 5.14 (dd,  $J = 3.5$  and  $1.5$  Hz, 1H), 5.10 (dd,  $J = 3.0$  and  $1.5$  Hz, 1H), 5.06 (dd,  $J = 3.0$  and  $1.5$  Hz, 1H), 4.68 (dd,  $J = 3.5$  and  $1.5$  Hz, 1H), 3.03-2.90 (m, 4H), 2.71-2.65 (m, 2H), 2.58 (d,  $J = 2.0$  Hz, 1H), 2.10-2.04 (m, 1H), 1.94-1.86 (m, 1H), 1.78 (d,  $J = 1.0$  Hz, 3H), 1.49 (s, 3H);  $^{13}\text{C}$  NMR (125 MHz,  $\text{CDCl}_3$ )  $\delta$  140.5, 135.7, 122.5, 116.2, 69.7, 53.6, 37.2, 26.8, 25.9, 24.5, 23.8, 22.7; high resolution mass spectrum ( $\text{ES}^+$ )  $m/z$  267.0848 [(M+Na) $^+$ ; calcd for  $\text{C}_{17}\text{H}_{15}\text{OS}$ : 267.0848].

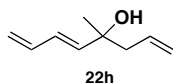

**Compound 22h.** Using conditions similar to those used for **21a**, linchpin **11** (69.9 mg, 0.49 mmol, 1.0 equiv.) afforded **22h** (43.3 mg, 0.31 mmol, 64% yield) as a pale yellow oil after flash chromatography (diethyl ether/hexane = 1/10).  $R_f$  0.24 (hexane/diethyl ether = 5/1); IR (film) 3405 (m), 3079 (w), 2925 (s), 2854 (s), 1734 (m), 1641 (m), 1461 (m), 1378 (m), 1255 (m), 1078 (m)  $\text{cm}^{-1}$ ;  $^1\text{H}$  NMR (500 MHz,  $\text{CDCl}_3$ )  $\delta$  6.37-6.29 (m, 1H), 6.26-6.21 (m, 1H), 5.82-5.74 (m, 2H), 5.20 (dd,  $J = 16.5$  and  $1.0$  Hz, 1H), 5.16-5.10 (m, 2H), 5.07 (dd,  $J = 10.0$  and  $1.5$  Hz, 1H), 2.31 (ddd,  $J = 37.0$ ,  $13.5$  and  $6.5$  Hz, 2H), 1.76 (br, 1H), 1.30 (s, 3H);  $^{13}\text{C}$  NMR (125 MHz,  $\text{CDCl}_3$ )  $\delta$  140.3, 136.4, 133.5, 128.3, 119.2, 117.0, 72.0, 47.1, 27.7; high resolution mass spectrum ( $\text{CI}^+$ )  $m/z$  121.1012 [(M-OH) $^+$ ; calcd for  $\text{C}_9\text{H}_{13}$ : 121.1017].

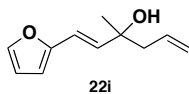

**Compound 22i.** Using conditions similar to those used for **21a**, linchpin **11** (67.2 mg, 0.47 mmol, 1.0 equiv.) afforded **22i** (47.0 mg, 0.26 mmol, 56% yield) as a pale yellow oil after flash chromatography (diethyl ether/hexane = 1/10).  $R_f$  0.23 (hexane/diethyl ether = 5/1); IR (film) 3404 (s), 3076 (w), 2974 (s), 2925 (s), 1640 (m), 1489 (m), 1373 (m), 1275 (m), 1149 (s), 1013 (s)  $\text{cm}^{-1}$ ;

$^1\text{H}$  NMR (500 MHz,  $\text{CDCl}_3$ )  $\delta$  7.33 (d,  $J = 1.5$  Hz, 1H), 6.43 (d,  $J = 16.0$  Hz, 1H), 6.36 (dd,  $J = 3.5$  and 2.0 Hz, 1H), 6.25 (d,  $J = 16.0$  Hz, 1H), 6.21 (d,  $J = 3.5$  Hz, 1H), 5.87-5.79 (m, 1H), 5.19-5.13 (m, 2H), 2.38 (ddd,  $J = 43.5$ , 13.5 and 6.5 Hz, 2H), 1.76 (br, 1H), 1.36 (s, 3H);  $^{13}\text{C}$  NMR (125 MHz,  $\text{CDCl}_3$ )  $\delta$  152.6, 141.7, 134.9, 133.5, 119.4, 116.2, 111.3, 107.7, 72.1, 47.3, 28.0; high resolution mass spectrum ( $\text{Cl}^+$ )  $m/z$  161.0973 [(M-OH) $^+$ ]; calcd for  $\text{C}_{11}\text{H}_{13}\text{O}$ : 161.0966].

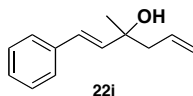

**Compound 22j.** Using conditions similar to those used for **21a**, linchpin **11** (67.5 mg, 0.47 mmol, 1.0 equiv.) afforded **22j** (54.5 mg, 0.29 mmol, 61% yield) as a pale yellow oil after flash chromatography (diethyl ether/hexane = 1/10).  $R_f$  0.24 (hexane/diethyl ether = 5/1); IR (film) 3397 (s), 3077 (m), 3026 (m), 2976 (s), 2928 (m), 1947 (w), 1813 (w), 1640 (m), 1493 (m), 1448 (m), 1053 (m)  $\text{cm}^{-1}$ ;  $^1\text{H}$  NMR (500 MHz,  $\text{CDCl}_3$ )  $\delta$  7.40-7.38 (m, 2H), 7.34-7.31 (m, 2H), 7.25-7.22 (m, 1H), 6.61 (d,  $J = 16.0$  Hz, 1H), 6.31 (d,  $J = 16.0$  Hz, 1H), 5.89-5.81 (m, 1H), 5.19-5.15 (m, 2H), 2.42 (ddd,  $J = 40.5$ , 13.5 and 6.5 Hz, 2H), 1.86 (br, 1H), 1.40 (s, 3H);  $^{13}\text{C}$  NMR (125 MHz,  $\text{CDCl}_3$ )  $\delta$  136.9, 136.2, 133.5, 128.5, 127.39, 127.38, 126.4, 119.3, 72.3, 47.3, 27.9; high resolution mass spectrum ( $\text{ES}^+$ )  $m/z$  211.1093 [(M+Na) $^+$ ]; calcd for  $\text{C}_{13}\text{H}_{16}\text{ONa}$ : 211.1099].

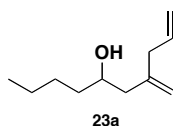

**Compound 23a.** To a solution of *n*-BuLi (2.2 M in hexane, 0.41 mL, 0.89 mmol, 2.0 equiv.) in  $\text{Et}_2\text{O}$  (0.5 mL) at  $-78$   $^\circ\text{C}$  was added linchpin **12** (63.5 mg, 0.446 mmol, 1.0 equiv.) in  $\text{Et}_2\text{O}$  (0.5 mL) dropwise. After being stirred for 30 min, the resulting solution was added to a mixture of CuI (169.9 mg, 0.89 mmol, 2.0 equiv.) in HMPA/THF (1 mL/1 mL) via cannula at  $0$   $^\circ\text{C}$ . The resulting solution was warmed to room temperature. After stirring for 2 h at room temperature, allyl bromide (0.08 mL, 0.89 mmol, 2.0 equiv.) was added. After being stirred for 12 h at room temperature, 3 mL of 1N HCl was added. After 10 min, a saturated aqueous  $\text{NH}_4\text{Cl}$  (3 mL) solution was added, and the resulting mixture extracted with  $\text{Et}_2\text{O}$  (10 mL x 2) and  $\text{CH}_2\text{Cl}_2$  (10 mL x 2). The combined

organic layers were washed with brine, dried over  $\text{MgSO}_4$ , filtered and concentrated *in vacuo*. Flash chromatography (diethyl ether/hexane = 1/20), afforded **23a** (36.9 mg, 0.22 mmol, 49% yield) as a colorless oil.  $R_f$  0.3 (hexane/diethyl ether = 5/1); IR (film) 3402 (m), 3078 (m), 2957 (s), 2929 (s), 2860 (s), 1641 (m), 1434 (m), 1035 (m)  $\text{cm}^{-1}$ ;  $^1\text{H}$  NMR (500 MHz,  $\text{CDCl}_3$ )  $\delta$  5.83-5.78 (m, 1H), 5.09-5.05 (m, 2H), 4.92 (d,  $J = 1.0$  Hz, 1H), 4.88 (d,  $J = 1.0$  Hz, 1H), 3.73-3.69 (m, 1H), 2.79 (ddd,  $J = 23.0, 16.0$  and  $7.2$  Hz, 2H), 2.26 (dd,  $J = 17.0$  and  $3.5$  Hz, 1H), 2.07 (dd,  $J = 14.0$  and  $9.5$  Hz, 1H), 1.71 (br, 1H), 1.49-1.41 (m, 3H), 1.38-1.31 (m, 3H), 0.91 (t,  $J = 7.0$  Hz, 3H);  $^{13}\text{C}$  NMR (125 MHz,  $\text{CDCl}_3$ )  $\delta$  145.1, 135.9, 116.6, 113.5, 68.8, 44.3, 40.5, 36.8, 27.9, 22.7, 14.0; high resolution mass spectrum ( $\text{Cl}^+$ )  $m/z$  151.1490 [(M-OH) $^+$ ]; calcd for  $\text{C}_{11}\text{H}_{19}$ : 151.1487].

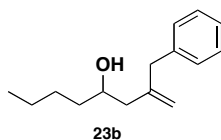

**Compound 23b.** Using conditions similar to those used for **23a**, linchpin **12** (64.1 mg, 0.45 mmol, 1.0 equiv.) afforded **23b** (41.5 mg, 0.19 mmol, 42% yield) as a colorless oil after flash chromatography (diethyl ether/hexane = 1/10).  $R_f$  0.24 (hexane/diethyl ether = 5/1); IR (film) 3422 (m), 3065 (m), 2955 (s), 2930 (s), 2860 (s), 1715 (w), 1643 (m), 1602 (w), 1494 (m), 1453 (m), 1032 (m)  $\text{cm}^{-1}$ ;  $^1\text{H}$  NMR (500 MHz,  $\text{CDCl}_3$ )  $\delta$  7.33-7.30 (m, 2H), 7.25-7.20 (m, 3H), 4.97 (s, 1H), 4.93 (s, 1H), 3.74-3.72 (m, 1H), 3.39 (dd,  $J = 26.5$  and  $15$  Hz, 2H), 2.21 (dd,  $J = 14.0$  and  $3.5$  Hz, 1H), 2.05 (dd,  $J = 14.0$  and  $9.5$  Hz, 1H), 1.69 (br, 1H), 1.48-1.39 (m, 3H), 1.37-1.26 (m, 3H), 0.90 (t,  $J = 7.0$  Hz, 3H);  $^{13}\text{C}$  NMR (125 MHz,  $\text{CDCl}_3$ )  $\delta$  146.0, 139.2, 129.0, 128.4, 126.2, 114.5, 68.9, 43.8, 42.8, 36.8, 27.8, 22.7, 14.0; high resolution mass spectrum ( $\text{ES}^+$ )  $m/z$  219.1745 [(M+H) $^+$ ]; calcd for  $\text{C}_{15}\text{H}_{23}\text{O}$ : 219.1749].

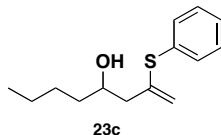

**Compound 23c.** Using conditions similar to those used for **23a**, linchpin **12** (62.1 mg, 0.44 mmol, 1.0 equiv.) afforded **23c** (53.6 mg, 0.23 mmol, 52% yield) as a colorless oil after flash chromatography (diethyl ether/hexane = 1/10).  $R_f$  0.24 (hexane/diethyl ether = 5/1); IR (film) 3403

(m), 3060 (w), 2955 (s), 2930 (s), 2860 (m), 1608 (m), 1583 (w), 1473 (m), 1438 (m), 1148 (w), 1027 (m)  $\text{cm}^{-1}$ ;  $^1\text{H}$  NMR (500 MHz,  $\text{CDCl}_3$ )  $\delta$  7.45 (d,  $J = 8.0$  Hz, 2H), 7.44-7.32 (m, 3H), 5.22 (s, 1H), 4.95 (s, 1H), 3.89-3.86 (m, 1H), 2.42 (dd,  $J = 14.0$  and 3.5 Hz, 1H), 2.31 (dd,  $J = 14.0$  and 3.5 Hz, 1H), 1.88 (br, 1H). 1.49- 1.41 (m, 2H), 1.40-1.26 (m, 4H), 0.89 (t,  $J = 7.0$  Hz, 3H);  $^{13}\text{C}$  NMR (125 MHz,  $\text{CDCl}_3$ )  $\delta$  143.0, 133.6, 132.3, 129.2, 128.2, 114.6, 69.7, 44.7, 36.3, 27.8, 22.6, 14.0; high resolution mass spectrum ( $\text{ES}^+$ )  $m/z$  259.1127  $[(\text{M}+\text{Na})^+]$ ; calcd for  $\text{C}_{14}\text{H}_{20}\text{OSNa}$ : 259.1133].

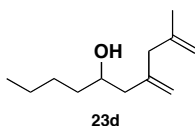

**Compound 23d.** Using conditions similar to those used for **23a**, linchpin **12** (60.3 mg, 0.42 mmol, 1.0 equiv.) afforded **23d** (39.2 mg, 0.22 mmol, 51% yield) as a colorless oil after flash chromatography (diethyl ether/hexane = 1/20).  $R_f$  0.35 (hexane/diethyl ether = 5/1); IR (film) 3405 (m), 3075 (m), 2957 (s), 2930 (s), 2860 (s), 1640 (m), 1439 (m), 1035 (m)  $\text{cm}^{-1}$ ;  $^1\text{H}$  NMR (500 MHz,  $\text{CDCl}_3$ )  $\delta$  4.93 (d,  $J = 6.0$  Hz, 2H), 4.82 (d,  $J = 1.0$  Hz, 1H), 4.74 (d,  $J = 1.0$  Hz, 1H), 3.71-3.69 (m, 1H), 2.76 (dd,  $J = 22.0$  and 14.5 Hz, 2H), 2.23 (dd,  $J = 14.0$  and 3.0 Hz, 1H), 2.01 (dd,  $J = 14.0$  and 9.5 Hz, 1H), 1.72 (br, 1H), 1.68 (s, 3H), 1.49-1.42 (m, 3H), 1.35-1.29 (m, 3H), 0.90 (t,  $J = 7.0$  Hz, 3H);  $^{13}\text{C}$  NMR (125 MHz,  $\text{CDCl}_3$ )  $\delta$  144.2, 143.1, 114.5, 112.6, 68.8, 45.2, 43.5, 36.8, 27.9, 22.7, 21.8, 14.0; high resolution mass spectrum ( $\text{CI}^+$ )  $m/z$  165.1637  $[(\text{M}-\text{OH})^+]$ ; calcd for  $\text{C}_{12}\text{H}_{21}$ : 165.1643].

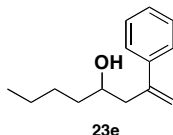

**Compound 23e.** To a solution of *n*-BuLi (2.2 M in hexane, 0.41 mL, 0.89 mmol, 2.0 equiv.) in  $\text{Et}_2\text{O}$  (0.5 mL) at  $-78$   $^\circ\text{C}$  was added linchpin **12** (63.4 mg, 0.45 mmol, 1.0 equiv.) in  $\text{Et}_2\text{O}$  (0.5 mL) dropwise. After being stirred for 30 min, the resulting solution was added to a mixture of CuI (169.6 mg, 0.89 mmol, 2.0 equiv.) in HMPA/THF (1 mL/1 mL) via cannula at  $0$   $^\circ\text{C}$ . The resulting solution was warmed to room temperature. After stirring for 2 h at room temperature, phenyl

iodide (0.1 mL, 0.89 mmol, 2.0 equiv.) and Pd(PPh<sub>3</sub>)<sub>4</sub> (15.5 mg, 0.013 mmol, 0.03 equiv.) in THF (1 mL) were added. After being stirred for 12 h at room temperature, 3 mL of 1N HCl was added. After 10 min, a saturated aqueous NH<sub>4</sub>Cl (3 mL) solution was added, and the resulting mixture extracted with Et<sub>2</sub>O (10 mL x 2) and CH<sub>2</sub>Cl<sub>2</sub> (10 mL x 2). The combined organic layers were washed with brine, dried over MgSO<sub>4</sub>, filtered and concentrated *in vacuo*. Flash chromatography (diethyl ether/hexane = 1/10), afforded **23e** (40.7 mg, 0.20 mmol, 45% yield) as a pale yellow oil. R<sub>f</sub> 0.21 (hexane/diethyl ether = 5/1); IR (film) 3386 (m), 3082 (w), 2955 (s), 2930 (s), 2861 (s), 1626 (w), 1494 (w), 1448 (m), 1030 (m) cm<sup>-1</sup>; <sup>1</sup>H NMR (500 MHz, CDCl<sub>3</sub>) δ 7.42-7.40 (m, 2H), 7.36-7.33 (m, 2H), 7.30-7.29 (m, 1H), 5.41 (d, *J* = 1.5 Hz, 1H), 5.17 (d, *J* = 1.0 Hz, 1H), 3.67-3.62 (m, 1H), 2.81 (dd, *J* = 14.5 and 4.0 Hz, 1H), 2.51 (dd, *J* = 14.0 and 9.0 Hz, 1H), 1.67 (br, 1H), 1.51-1.48 (m, 2H), 1.46-1.40 (m, 1H), 1.35-1.27 (m, 3H), 0.89 (t, *J* = 7.0 Hz, 3H); <sup>13</sup>C NMR (125 MHz, CDCl<sub>3</sub>) δ 145.5, 140.5, 128.4, 127.7, 126.2, 115.2, 69.4, 43.8, 36.7, 27.8, 22.7, 14.0; high resolution mass spectrum (Cl<sup>+</sup>) *m/z* 204.1514 [(M)<sup>+</sup>; calcd for C<sub>14</sub>H<sub>20</sub>O: 204.1514].

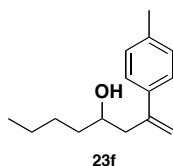

**Compound 23f.** Using conditions similar to those used for **23e**, linchpin **12** (69.2 mg, 0.48 mmol, 1.0 equiv.) afforded **23f** (46.3 mg, 0.21 mmol, 44% yield) as a pale yellow oil after flash chromatography (diethyl ether/hexane = 1/10). R<sub>f</sub> 0.21 (hexane/diethyl ether = 5/1); IR (film) 3389 (m), 3083 (w), 3024 (w), 2955 (s), 2930 (s), 2862 (s), 1902 (w), 1703 (w), 1624 (m), 1512 (m), 1455 (m), 1032 (m) cm<sup>-1</sup>; <sup>1</sup>H NMR (500 MHz, CDCl<sub>3</sub>) δ 7.31 (d, *J* = 8.5 Hz, 2H), 7.15 (d, *J* = 8.0 Hz, 2H), 5.39 (d, *J* = 1.5 Hz, 1H), 5.13 (d, *J* = 1.5 Hz, 1H), 3.68-3.63 (m, 1H), 2.80 (dd, *J* = 14.0 and 3.5 Hz, 1H), 2.49 (dd, *J* = 14.0 and 9.0 Hz, 1H), 2.36 (s, 3H), 1.52-1.48 (m, 2H), 1.45-1.43 (m, 1H), 1.35-1.27 (m, 4H), 0.90 (t, *J* = 7.0 Hz, 3H); <sup>13</sup>C NMR (125 MHz, CDCl<sub>3</sub>) δ 145.3, 137.6, 137.4, 129.0, 126.0, 114.4, 69.4, 43.8, 36.6, 27.8, 22.7, 21.0, 14.0; high resolution mass spectrum (Cl<sup>+</sup>) *m/z* 219.1739 [(M+H)<sup>+</sup>; calcd for C<sub>15</sub>H<sub>23</sub>O: 219.1749].

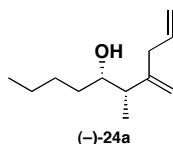

**Compound (-)-24a.** Using conditions similar to those used for **23b**, linchpin (+)-**13** (63.0 mg, 0.40 mmol, 1.0 equiv.) afforded (-)-**24a** (47.3 mg, 0.26 mmol, 65% yield) as a colorless oil after flash chromatography (ethyl acetate/hexane = 1/15).  $R_f$  0.55 (hexane/ethyl acetate = 10/1);  $[\alpha]_D^{25}$  -73.4 ( $c$  0.64,  $\text{CHCl}_3$ ); IR (film) 3367 (m), 3079 (w), 2958 (s), 2932 (s), 2873 (m), 1641 (m), 1459 (m), 997 (w)  $\text{cm}^{-1}$ ;  $^1\text{H}$  NMR (500 MHz,  $\text{CDCl}_3$ )  $\delta$  5.81 (m, 1H), 5.08 (d,  $J$  = 1.5 Hz, 1H), 5.05 (m, 1H), 4.94 (dd,  $J$  = 3.0 and 1.5 Hz, 1H), 4.89 (s, 1H), 3.59 (m, 1H), 2.84 (dd,  $J$  = 16.0 and 6.5 Hz, 1H), 2.76 (dd,  $J$  = 16.0 and 7.5 Hz, 1H), 2.21 (m, 1H), 1.62 (br, 1H), 1.50-1.20 (m, 6H), 1.03 (d,  $J$  = 7.0 Hz, 3H), 0.92 (t,  $J$  = 7.0 Hz, 3H);  $^{13}\text{C}$  NMR (125 MHz,  $\text{CDCl}_3$ )  $\delta$  151.1, 136.5, 116.7, 111.6, 72.2, 44.3, 40.4, 34.4, 28.7, 22.9, 14.3, 12.8; high resolution mass spectrum ( $\text{ES}^+$ )  $m/z$  205.1574  $[(\text{M}+\text{Na})^+]$ ; calcd for  $\text{C}_{12}\text{H}_{22}\text{ONa}$ : 205.1568].

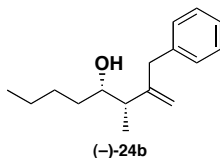

**Compound (-)-24b.** Using conditions similar to those used for **23b**, linchpin (+)-**13** (63.0 mg, 0.40 mmol, 1.0 equiv.) afforded (-)-**24b** (61.2 mg, 0.26 mmol, 66% yield) as a colorless oil after flash chromatography (ethyl acetate/hexane = 1/10).  $R_f$  0.46 (hexane/ethyl acetate = 10/1);  $[\alpha]_D^{25}$  -59.4 ( $c$  0.72,  $\text{CHCl}_3$ ); IR (film) 3376 (m), 3084 (w), 3027 (w), 2953 (s), 2931 (s), 2872 (m), 1639 (w), 1495 (w), 1454 (m), 1109 (s)  $\text{cm}^{-1}$ ;  $^1\text{H}$  NMR (500 MHz,  $\text{CDCl}_3$ )  $\delta$  7.30 (m, 2H), 7.23 (m, 1H), 7.20 (m, 2H), 4.96 (s, 1H), 4.88 (s, 1H), 3.61 (m, 1H), 3.44 (d,  $J$  = 15.0 Hz, 1H), 3.35 (d,  $J$  = 15.5 Hz, 1H), 2.18 (m, 1H), 1.55 (br, 1H), 1.50-1.20 (m, 6H), 1.02 (d,  $J$  = 7.0 Hz, 3H), 0.91 (t,  $J$  = 7.0 Hz, 3H);  $^{13}\text{C}$  NMR (125 MHz,  $\text{CDCl}_3$ )  $\delta$  152.1, 139.5, 129.3, 128.6, 126.4, 112.7, 72.2, 43.6, 42.9, 34.3, 28.7, 22.9, 14.3, 13.0; high resolution mass spectrum ( $\text{CI}^+$ )  $m/z$  232.1827  $[(\text{M})^+]$ ; calcd for  $\text{C}_{16}\text{H}_{24}\text{O}$ : 232.1827].

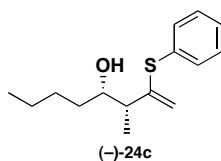

**Compound (-)-24c.** Using conditions similar to those used for **23b**, linchpin (+)-**13** (63.0 mg, 0.40 mmol, 1.0 equiv.) afforded (-)-**24c** (56.0 mg, 0.22 mmol, 56% yield) as a pale yellow oil after flash chromatography (ethyl acetate/hexane = 1/15).  $R_f$  0.41 (hexane/ethyl acetate = 10/1);  $[\alpha]_D^{25} -92.0$  ( $c$  0.68,  $\text{CHCl}_3$ ); IR (film) 3390 (m), 3074 (w), 2956 (s), 2932 (s), 2872 (m), 1605 (w), 1583 (m), 1476 (m), 1457 (m), 1440 (m), 748 (m)  $\text{cm}^{-1}$ ;  $^1\text{H}$  NMR (500 MHz,  $\text{CDCl}_3$ )  $\delta$  7.46 (m, 2H), 7.34 (m, 3H), 5.20 (s, 1H), 4.87 (s, 1H), 3.85 (m, 1H), 2.38 (m, 1H), 1.65 (d,  $J = 2.5$  Hz, 1H), 1.51-1.30 (m, 6H), 1.16 (d,  $J = 7.0$  Hz, 3H), 0.91 (t,  $J = 7.0$  Hz, 3H);  $^{13}\text{C}$  NMR (125 MHz,  $\text{CDCl}_3$ )  $\delta$  149.8, 134.0, 132.7, 129.5, 128.4, 111.9, 73.0, 45.6, 34.3, 28.6, 22.9, 14.3, 13.4; high resolution mass spectrum ( $\text{ES}^+$ )  $m/z$  233.1365  $[(\text{M}-\text{OH})^+]$ ; calcd for  $\text{C}_{15}\text{H}_{21}\text{S}$ : 233.1364].

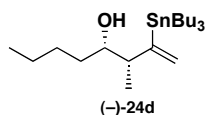

**Compound (-)-24d.** Using conditions similar to those used for **23b**, linchpin (+)-**13** (63.0 mg, 0.40 mmol, 1.0 equiv.) afforded (-)-**24d** (114.0 mg, 0.26 mmol, 66% yield) as a colorless oil after flash chromatography (ethyl acetate/hexane = 1/20).  $R_f$  0.53 (hexane/ethyl acetate = 20/1);  $[\alpha]_D^{25} -7.2$  ( $c$  1.05,  $\text{CHCl}_3$ ); IR (film) 3566 (m), 2957 (s), 2927 (s), 2872 (m), 2855 (m), 1463 (w), 1417 (w), 1377 (w), 916 (w)  $\text{cm}^{-1}$ ;  $^1\text{H}$  NMR (500 MHz,  $\text{CDCl}_3$ )  $\delta$  5.77 (s,  $J_{\text{H-Sn}} = 69.5$  Hz, 1H), 5.25 (d,  $J_{\text{H-H}} = 2.5$  Hz,  $J_{\text{H-Sn}} = 33.0$  Hz, 1H), 3.45 (m, 1H), 2.43 (m, 1H), 1.70-1.20 (m, 25H), 1.04 (d,  $J = 7.0$  Hz, 3H), 0.89 (m, 12H);  $^{13}\text{C}$  NMR (125 MHz,  $\text{CDCl}_3$ )  $\delta$  159.1, 125.7, 73.8, 49.4, 34.8, 29.3 (t,  $J = 9.8$  Hz), 28.5, 28.1 (t,  $J = 11.0$  Hz), 27.6 (t,  $J = 28.3$  Hz), 27.1 (t,  $J = 61.9$  Hz), 23.0, 17.7 (t,  $J = 167.0$  Hz), 14.3, 14.1, 13.9, 13.8, 10.4 (t,  $J = 157.6$  Hz); high resolution mass spectrum ( $\text{ES}^+$ )  $m/z$  455.2309  $[(\text{M}+\text{Na})^+]$ ; calcd for  $\text{C}_{21}\text{H}_{44}\text{OSnNa}$ : 455.2312].

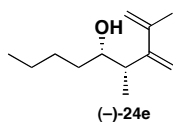



**Compound (-)-24e.** Using conditions similar to those used for **23f**, linchpin (+)-**13** (63.0 mg, 0.40 mmol, 1.0 equiv.) afforded (-)-**24e** (51.0 mg, 0.28 mmol, 70% yield) as a colorless oil after flash chromatography (ethyl acetate/hexane = 1/15).  $R_f$  0.55 (hexane/ethyl acetate = 10/1);  $[\alpha]_D^{25}$  -53.0 ( $c$  0.91,  $\text{CHCl}_3$ ); IR (film) 3353 (m), 3096 (w), 2957 (s), 2932 (s), 2870 (m), 2857 (m), 1701 (w), 1597 (w), 1458 (w), 1100 (m), 890 (s)  $\text{cm}^{-1}$ ;  $^1\text{H}$  NMR (500 MHz,  $\text{CDCl}_3$ )  $\delta$  5.28 (s, 1H), 5.08 (s, 1H), 5.01 (s, 1H), 4.99 (d,  $J = 1.0$  Hz, 1H), 3.57 (m, 1H), 2.73 (m, 1H), 1.92 (d,  $J = 1.0$  Hz, 3H), 1.52-1.45 (m, 7H), 1.08 (d,  $J = 7.0$  Hz, 3H), 0.89 (t,  $J = 7.0$  Hz, 3H);  $^{13}\text{C}$  NMR (125 MHz,  $\text{CDCl}_3$ )  $\delta$  151.6, 143.4, 112.8, 112.2, 72.9, 39.7, 34.4, 28.8, 22.9, 21.9, 14.3, 12.9; high resolution mass spectrum ( $\text{ES}^+$ )  $m/z$  205.1582  $[(\text{M}+\text{Na})^+]$ ; calcd for  $\text{C}_{12}\text{H}_{22}\text{ONa}$ : 205.1568].

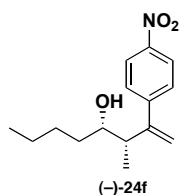

**Compound (-)-24f.** Using conditions similar to those used for **23f**, linchpin (+)-**13** (63.0 mg, 0.40 mmol, 1.0 equiv.) afforded (-)-**24f** (65.1 mg, 0.25 mmol, 62% yield) as a pale yellow oil after flash chromatography (ethyl acetate/hexane = 1/10).  $R_f$  0.32 (hexane/ethyl acetate = 10/1);  $[\alpha]_D^{26}$  -92.4 ( $c$  1.58,  $\text{CHCl}_3$ ); IR (film) 3435 (m), 3080 (w), 2956 (s), 2931 (s), 2860 (m), 1596 (m), 1518 (s), 1345 (s), 1111 (w), 859 (m)  $\text{cm}^{-1}$ ;  $^1\text{H}$  NMR (500 MHz,  $\text{CDCl}_3$ )  $\delta$  8.20 (ddd,  $J = 9.5, 2.5$  and  $1.0$  Hz, 2H), 7.50 (ddd,  $J = 9.0, 2.5$  and  $1.5$  Hz, 2H), 5.47 (s, 1H), 5.31 (s, 1H), 3.48 (m, 1H), 2.82 (m, 1H), 1.59 (br, 1H), 1.85 (m, 2H), 1.40-1.20 (m, 4H), 1.20 (d,  $J = 7.0$  Hz, 3H), 0.89 (t,  $J = 7.0$  Hz, 3H);  $^{13}\text{C}$  NMR (125 MHz,  $\text{CDCl}_3$ )  $\delta$  151.0, 149.4, 147.3, 127.7, 123.9, 116.7, 72.8, 43.1, 34.7, 28.6, 22.9, 14.2, 13.1; high resolution mass spectrum ( $\text{ES}^-$ )  $m/z$  298.1221  $[(\text{M}+\text{Cl})^-]$ ; calcd for  $\text{C}_{15}\text{H}_{21}\text{NO}_3\text{Cl}$ : 298.1210].

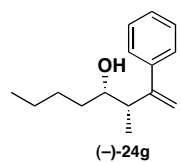

**Compound (–)-24g.** Using conditions similar to those used for **23f**, linchpin (+)-**13** (63.0 mg, 0.40 mmol, 1.0 equiv.) afforded (–)-**24g** (54.1 mg, 0.28 mmol, 71% yield) as a pale yellow oil after flash chromatography (ethyl acetate/hexane = 1/10).  $R_f$  0.44 (hexane/ethyl acetate = 10/1);  $[\alpha]_D^{26} -70.6$  ( $c$  1.99,  $\text{CHCl}_3$ ); IR (film) 3403 (m), 3080 (w), 3055 (w), 2957 (s), 2930 (s), 2873 (m), 2857 (m), 1626 (w), 1491 (m), 1464 (w), 1096 (m), 1027 (m), 899 (m)  $\text{cm}^{-1}$ ;  $^1\text{H NMR}$  (500 MHz,  $\text{CDCl}_3$ )  $\delta$  7.37-7.28 (m, 5H), 5.37 (d,  $J = 1.0$  Hz, 1H), 5.14 (d,  $J = 1.0$  Hz, 1H), 3.50 (m, 1H), 2.85 (m, 1H), 1.86 (br, 1H), 1.51-1.20 (m, 6H), 1.04 (d,  $J = 6.5$  Hz, 3H), 0.89 (t,  $J = 7.0$  Hz, 3H);  $^{13}\text{C NMR}$  (125 MHz,  $\text{CDCl}_3$ )  $\delta$  152.6, 142.5, 128.6, 127.7, 126.8, 113.7, 72.4, 43.0, 34.5, 28.7, 22.9, 14.2, 12.7; high resolution mass spectrum ( $\text{ES}^+$ )  $m/z$  241.1569  $[(\text{M}+\text{Na})^+]$ ; calcd for  $\text{C}_{15}\text{H}_{22}\text{ONa}$ : 241.1568].

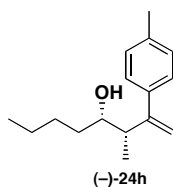

**Compound (–)-24h.** Using conditions similar to those used for **23f**, linchpin (+)-**13** (63.0 mg, 0.40 mmol, 1.0 equiv.) afforded (–)-**24h** (69.6 mg, 0.30 mmol, 75% yield) as a pale yellow oil after flash chromatography (ethyl acetate/hexane = 1/10).  $R_f$  0.45 (hexane/ethyl acetate = 10/1);  $[\alpha]_D^{25} -81.5$  ( $c$  1.38,  $\text{CHCl}_3$ ); IR (film) 3408 (m), 3084 (w), 3024 (w), 2957 (s), 2931 (s), 2872 (m), 1623 (w), 1511 (m), 1457 (m), 1119 (m), 898 (m)  $\text{cm}^{-1}$ ;  $^1\text{H NMR}$  (500 MHz,  $\text{CDCl}_3$ )  $\delta$  7.28 (d,  $J = 8.5$  Hz, 2H), 7.17 (d,  $J = 8.5$  Hz, 2H), 5.38 (s, 1H), 5.12 (s, 1H), 3.52 (m, 1H), 2.87 (m, 1H), 2.38 (s, 3H), 1.52-1.33 (m, 7H), 1.20 (d,  $J = 7.0$  Hz, 3H), 0.89 (t,  $J = 7.0$  Hz, 3H);  $^{13}\text{C NMR}$  (125 MHz,  $\text{CDCl}_3$ )  $\delta$  152.4, 139.5, 137.4, 129.3, 126.7, 112.9, 72.4, 42.9, 34.4, 28.7, 22.9, 21.3, 14.2, 12.6; high resolution mass spectrum ( $\text{ES}^+$ )  $m/z$  255.1761  $[(\text{M}+\text{Na})^+]$ ; calcd for  $\text{C}_{16}\text{H}_{24}\text{ONa}$ : 255.1725].

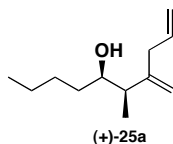

**Compound (+)-25a.** Using conditions similar to those used for **23b**, linchpin (–)-**14** (63.0 mg, 0.40 mmol, 1.0 equiv.) afforded (+)-**25a** (49.5 mg, 0.27 mmol, 68% yield) as a colorless oil after flash chromatography (ethyl acetate/hexane = 1/15).  $R_f$  0.55 (hexane/ethyl acetate = 10/1);  $[\alpha]_D^{25} +72.0$

(*c* 0.19, CHCl<sub>3</sub>); IR (film) 3343 (m), 3079 (w), 2958 (s), 2932 (s), 2873 (m), 1641 (m), 1459 (m), 997 (w) cm<sup>-1</sup>; <sup>1</sup>H NMR (500 MHz, CDCl<sub>3</sub>) δ 5.81 (m, 1H), 5.08 (d, *J* = 1.5 Hz, 1H), 5.05 (m, 1H), 4.94 (dd, *J* = 3.0 and 1.5 Hz, 1H), 4.89 (s, 1H), 3.59 (m, 1H), 2.84 (dd, *J* = 16.0 and 6.5 Hz, 1H), 2.76 (dd, *J* = 16.0 and 7.5 Hz, 1H), 2.21 (m, 1H), 1.62 (br, 1H), 1.50-1.20 (m, 6H), 1.03 (d, *J* = 7.0 Hz, 3H), 0.92 (t, *J* = 7.0 Hz, 3H); <sup>13</sup>C NMR (125 MHz, CDCl<sub>3</sub>) δ 151.1, 136.5, 116.7, 111.6, 72.2, 44.3, 40.4, 34.4, 28.7, 22.9, 14.3, 12.8; high resolution mass spectrum (ES<sup>+</sup>) *m/z* 205.1579 [(M+Na)<sup>+</sup>; calcd for C<sub>12</sub>H<sub>22</sub>ONa: 205.1568].

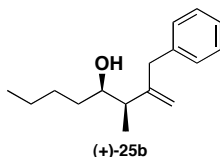

**Compound (+)-25b.** Using conditions similar to those used for **23b**, linchpin (–)-**14** (63.0 mg, 0.40 mmol, 1.0 equiv.) afforded (+)-**25b** (63.1 mg, 0.27 mmol, 68% yield) as a colorless oil after flash chromatography (ethyl acetate/hexane = 1/10). *R*<sub>f</sub> 0.46 (hexane/ethyl acetate = 10/1); [*α*]<sub>D</sub><sup>23</sup> +54.8 (*c* 0.88, CHCl<sub>3</sub>); IR (film) 3364 (m), 3084 (w), 3027 (w), 2956 (s), 2931 (s), 2872 (m), 1639 (w), 1495 (w), 1454 (m), 1109 (s) cm<sup>-1</sup>; <sup>1</sup>H NMR (500 MHz, CDCl<sub>3</sub>) δ 7.30 (m, 2H), 7.23 (m, 1H), 7.20 (m, 2H), 4.96 (s, 1H), 4.88 (s, 1H), 3.61 (m, 1H), 3.44 (d, *J* = 15.0 Hz, 1H), 3.35 (d, *J* = 15.5 Hz, 1H), 2.18 (m, 1H), 1.55 (br, 1H), 1.50-1.20 (m, 6H), 1.02 (d, *J* = 7.0 Hz, 3H), 0.91 (t, *J* = 7.0 Hz, 3H); <sup>13</sup>C NMR (125 MHz, CDCl<sub>3</sub>) δ 152.1, 139.5, 129.3, 128.6, 126.4, 112.7, 72.2, 43.6, 42.9, 34.3, 28.7, 22.9, 14.3, 13.0; high resolution mass spectrum (CI<sup>+</sup>) *m/z* 232.1827 [(M)<sup>+</sup>; calcd for C<sub>16</sub>H<sub>24</sub>O: 232.1827].

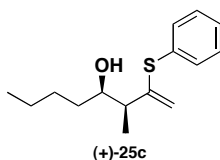

**Compound (+)-25c.** Using conditions similar to those used for **23b**, linchpin (–)-**14** (63.0 mg, 0.40 mmol, 1.0 equiv.) afforded (+)-**25c** (57.0 mg, 0.23 mmol, 57% yield) as a pale yellow oil after flash chromatography (ethyl acetate/hexane = 1/15). *R*<sub>f</sub> 0.41 (hexane/ethyl acetate = 10/1); [*α*]<sub>D</sub><sup>25</sup> +96.0 (*c* 0.57, CHCl<sub>3</sub>); IR (film) 3390 (m), 3074 (w), 2956 (s), 2932 (s), 2872 (m), 1605 (w), 1583 (m),

1476 (m), 1457 (m), 1440 (m), 748 (m)  $\text{cm}^{-1}$ ;  $^1\text{H}$  NMR (500 MHz,  $\text{CDCl}_3$ )  $\delta$  7.46 (m, 2H), 7.34 (m, 3H), 5.20 (s, 1H), 4.87 (s, 1H), 3.85 (m, 1H), 2.38 (m, 1H), 1.65 (d,  $J = 2.5$  Hz, 1H), 1.51-1.30 (m, 6H), 1.16 (d,  $J = 7.0$  Hz, 3H), 0.91 (t,  $J = 7.0$  Hz, 3H);  $^{13}\text{C}$  NMR (125 MHz,  $\text{CDCl}_3$ )  $\delta$  149.8, 134.0, 132.7, 129.5, 128.4, 111.9, 73.0, 45.6, 34.3, 28.6, 22.9, 14.3, 13.4; high resolution mass spectrum ( $\text{ES}^+$ )  $m/z$  233.1354 [(M-OH) $^+$ ]; calcd for  $\text{C}_{15}\text{H}_{21}\text{S}$ : 233.1364].

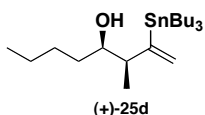

**Compound (+)-25d.** Using conditions similar to those used for **23b**, linchpin (–)-**14** (63.0 mg, 0.40 mmol, 1.0 equiv) afforded (+)-**25d** (116.0 mg, 0.27 mmol, 67% yield) as a colorless oil after flash chromatography (ethyl acetate/hexane = 1/20).  $R_f$  0.53 (hexane/ethyl acetate = 20/1);  $[\alpha]_D^{26} +8.9$  ( $c$  1.23,  $\text{CHCl}_3$ ); IR (film) 3358 (m), 2956 (s), 2928 (s), 2872 (m), 2855 (m), 1463 (w), 1417 (w), 1377 (w), 916 (w)  $\text{cm}^{-1}$ ;  $^1\text{H}$  NMR (500 MHz,  $\text{CDCl}_3$ )  $\delta$  5.77 (s,  $J_{\text{H-Sn}} = 69.5$  Hz, 1H), 5.25 (d,  $J_{\text{H-H}} = 2.5$  Hz,  $J_{\text{H-Sn}} = 33.0$  Hz, 1H), 3.45 (m, 1H), 2.43 (m, 1H), 1.70-1.20 (m, 25H), 1.04 (d,  $J = 7.0$  Hz, 3H), 0.89 (m, 12H);  $^{13}\text{C}$  NMR (125 MHz,  $\text{CDCl}_3$ )  $\delta$  159.1, 125.7, 73.8, 49.4, 34.8, 29.3 (t,  $J = 9.8$  Hz), 28.5, 28.1 (t,  $J = 11.0$  Hz), 27.6 (t,  $J = 28.3$  Hz), 27.1 (t,  $J = 61.9$  Hz), 23.0, 17.7 (t,  $J = 167.0$  Hz), 14.3, 14.1, 13.9, 13.8, 10.4 (t,  $J = 157.6$  Hz); high resolution mass spectrum ( $\text{ES}^+$ )  $m/z$  455.2314 [(M+Na) $^+$ ]; calcd for  $\text{C}_{21}\text{H}_{44}\text{OSnNa}$ : 455.2312].

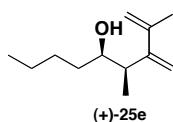

**Compound (+)-25e.** Using conditions similar to those used for **23f**, linchpin (–)-**14** (63.0 mg, 0.40 mmol, 1.0 equiv.) afforded (+)-**25e** (50.0 mg, 0.28 mmol, 69% yield) as a colorless oil after flash chromatography (ethyl acetate/hexane = 1/15).  $R_f$  0.55 (hexane/ethyl acetate = 10/1);  $[\alpha]_D^{25} +57.0$  ( $c$  0.97,  $\text{CHCl}_3$ ); IR (film) 3361 (m), 3096 (w), 2957 (s), 2932 (s), 2870 (m), 2857 (m), 1701 (w), 1597 (w), 1458 (w), 1100 (m), 890 (s)  $\text{cm}^{-1}$ ;  $^1\text{H}$  NMR (500 MHz,  $\text{CDCl}_3$ )  $\delta$  5.28 (s, 1H), 5.08 (s, 1H), 5.01 (s, 1H), 4.99 (d,  $J = 1.0$  Hz, 1H), 3.57 (m, 1H), 2.73 (m, 1H), 1.92 (d,  $J = 1.0$  Hz, 3H), 1.52-1.45 (m, 7H), 1.08 (d,  $J = 7.0$  Hz, 3H), 0.89 (t,  $J = 7.0$  Hz, 3H);  $^{13}\text{C}$  NMR (125 MHz,  $\text{CDCl}_3$ )

$\delta$  151.6, 143.4, 112.8, 112.2, 72.9, 39.7, 34.4, 28.8, 22.9, 21.9, 14.3, 12.9; high resolution mass spectrum (ES<sup>+</sup>)  $m/z$  205.1579 [(M+Na)<sup>+</sup>; calcd for C<sub>12</sub>H<sub>22</sub>ONa: 205.1568].

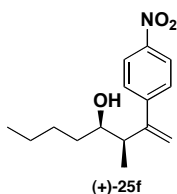

**Compound (+)-25f.** Using conditions similar to those used for **23f**, linchpin (–)-**14** (63.0 mg, 0.40 mmol, 1.0 equiv.) afforded (+)-**25f** (63.0 mg, 0.24 mmol, 60% yield) as a pale yellow oil after flash chromatography (ethyl acetate/hexane = 1/10).  $R_f$  0.32 (hexane/ethyl acetate = 10/1);  $[\alpha]_D^{26} +96.3$  ( $c$  1.2, CHCl<sub>3</sub>); IR (film) 3434 (m), 3080 (w), 2956 (s), 2931 (s), 2859 (m), 1596 (m), 1518 (s), 1345 (s), 1111 (w), 859 (m) cm<sup>-1</sup>; <sup>1</sup>H NMR (500 MHz, CDCl<sub>3</sub>)  $\delta$  8.20 (ddd,  $J$  = 9.5, 2.5 and 1.0 Hz, 2H), 7.50 (ddd,  $J$  = 9.0, 2.5 and 1.5 Hz, 2H), 5.47 (s, 1H), 5.31 (s, 1H), 3.48 (m, 1H), 2.82 (m, 1H), 1.59 (br, 1H), 1.85 (m, 2H), 1.40-1.20 (m, 4H), 1.20 (d,  $J$  = 7.0 Hz, 3H), 0.89 (t,  $J$  = 7.0 Hz, 3H); <sup>13</sup>C NMR (125 MHz, CDCl<sub>3</sub>)  $\delta$  151.0, 149.4, 147.3, 127.7, 123.9, 116.7, 72.8, 43.1, 34.7, 28.6, 22.9, 14.2, 13.1; high resolution mass spectrum (ES<sup>-</sup>)  $m/z$  298.0811 [(M+Cl)<sup>-</sup>; calcd for C<sub>15</sub>H<sub>21</sub>NO<sub>3</sub>Cl: 298.1210].

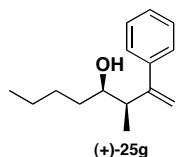

**Compound (+)-25g.** Using conditions similar to those used for **23f**, linchpin (–)-**14** (63.0 mg, 0.40 mmol, 1.0 equiv.) afforded (+)-**25g** (62.8 mg, 0.29 mmol, 72% yield) as a pale yellow oil after flash chromatography (ethyl acetate/hexane = 1/10).  $R_f$  0.44 (hexane/ethyl acetate = 10/1);  $[\alpha]_D^{25} +65.6$  ( $c$  1.09, CHCl<sub>3</sub>); IR (film) 3420 (m), 3084 (w), 3059 (w), 3030 (w), 2957 (s), 2930 (s), 2873 (m), 2857 (m), 1626 (w), 1491 (m), 1464 (w), 1096 (m), 1027 (m), 899 (m) cm<sup>-1</sup>; <sup>1</sup>H NMR (500 MHz, CDCl<sub>3</sub>)  $\delta$  7.37-7.28 (m, 5H), 5.37 (d,  $J$  = 1.0 Hz, 1H), 5.14 (d,  $J$  = 1.0 Hz, 1H), 3.50 (m, 1H), 2.85 (m, 1H), 1.86 (br, 1H), 1.51-1.20 (m, 6H), 1.04 (d,  $J$  = 6.5 Hz, 3H), 0.89 (t,  $J$  = 7.0 Hz, 3H); <sup>13</sup>C NMR (125 MHz, CDCl<sub>3</sub>)  $\delta$  152.6, 142.5, 128.6, 127.7, 126.8, 113.7, 72.4, 43.0, 34.5, 28.7, 22.9,

14.2, 12.7; high resolution mass spectrum (ES<sup>+</sup>)  $m/z$  241.1556 [(M+Na)<sup>+</sup>; calcd for C<sub>15</sub>H<sub>22</sub>ONa: 241.1568].

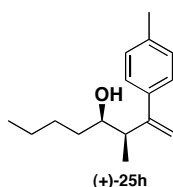

**Compound (+)-25h.** Using conditions similar to those used for **23f**, linchpin (–)-**14** (63.0 mg, 0.40 mmol, 1.0 equiv.) afforded (+)-**25h** (68.7 mg, 0.30 mmol, 74% yield) as a pale yellow oil after flash chromatography (ethyl acetate/hexane = 1/10).  $R_f$  0.45 (hexane/ethyl acetate = 10/1);  $[\alpha]_D^{25} +79.8$  ( $c$  1.30, CHCl<sub>3</sub>); IR (film) 3406 (m), 3084 (w), 3024 (w), 2957 (s), 2931 (s), 2872 (m), 1623 (w), 1511 (m), 1457 (m), 1119 (m), 898 (m) cm<sup>-1</sup>; <sup>1</sup>H NMR (500 MHz, CDCl<sub>3</sub>)  $\delta$  7.28 (d,  $J$  = 8.5 Hz, 2H), 7.17 (d,  $J$  = 8.5 Hz, 2H), 5.38 (s, 1H), 5.12 (s, 1H), 3.52 (m, 1H), 2.87 (m, 1H), 2.38 (s, 3H), 1.52-1.33 (m, 7H), 1.20 (d,  $J$  = 7.0 Hz, 3H), 0.89 (t,  $J$  = 7.0 Hz, 3H); <sup>13</sup>C NMR (125 MHz, CDCl<sub>3</sub>)  $\delta$  152.4, 139.5, 137.4, 129.3, 126.7, 112.9, 72.4, 42.9, 34.4, 28.7, 22.9, 21.3, 14.2, 12.6; high resolution mass spectrum (ES<sup>+</sup>)  $m/z$  255.1768 [(M+Na)<sup>+</sup>; calcd for C<sub>16</sub>H<sub>24</sub>ONa: 255.1725].

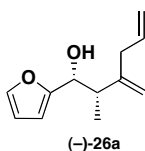

**Compound (–)-26a.** To a solution of furan (58.2  $\mu$ L, 0.81 mmol, 2.0 equiv.) in THF (0.5 mL) was added *n*-BuLi (2.2 M in hexane, 0.36 mL, 0.81 mmol, 2.0 equiv.) at –15 °C. After the addition was complete, the reaction mixture was stirred for an additional 30 min. The resulting solution was warmed to 0 °C, and stirred for 1.5 h. After cooling to –78 °C, linchpin (+)-**13** (63 mg, 0.40 mmol, 1.0 equiv.) dissolved in Et<sub>2</sub>O (0.5 mL) was added dropwise to the reaction mixture. After being stirred for 30 min, the resulting solution was added to a mixture of CuI (152.3 mg, 0.81 mmol, 2.0 equiv.) in HMPA/THF (1 mL/1 mL) via cannula at 0 °C, and allowed to warm to room temperature. After stirring for 2 h at room temperature, allyl bromide (0.07 mL, 0.81 mmol, 2.0 equiv.) was added. After 12 h, TBAF (1.62 mL, 1.62 mmol, 4.0 equiv.) was added. After 1 h, a saturated aqueous NH<sub>4</sub>Cl (3 mL) solution was added, and the resulting mixture was extracted with Et<sub>2</sub>O (10

mL x 2) and CH<sub>2</sub>Cl<sub>2</sub> (10 mL x 2). The combined organic layers were washed with brine, dried over MgSO<sub>4</sub>, filtered and concentrated *in vacuo*. Flash chromatography (ethyl acetate/hexane = 1/10), afforded (–)-**26a** (44.5 mg, 0.23 mmol, 58% yield) as a colorless oil. R<sub>f</sub> 0.41 (hexane/ethyl acetate = 10/1); [α]<sup>18</sup><sub>D</sub> –14.1 (c 1.5, CHCl<sub>3</sub>); IR (film) 3420 (s), 3078 (w), 2978 (s), 2917 (s), 1642 (w), 1505 (m), 1149 (m), 1009 (s), 914 (m) cm<sup>-1</sup>; <sup>1</sup>H NMR (500 MHz, CDCl<sub>3</sub>) δ 7.36 (dd, *J* = 1.0 and 0.5 Hz, 1H), 6.33 (dd, *J* = 3.0 and 2.0 Hz, 1H), 6.23 (dd, *J* = 3.0 and 0.5 Hz, 1H), 5.77 (m, 1H), 5.07 (s, 1H), 5.04 (d, *J* = 8.0 Hz, 1H), 4.92 (d, *J* = 6.0 Hz, 2H), 4.71 (d, *J* = 6.0 Hz, 1H), 3.27 (m, 3H), 1.80 (br, 1H), 1.12 (d, *J* = 7.0 Hz, 3H); <sup>13</sup>C NMR (125 MHz, CDCl<sub>3</sub>) δ 155.8, 149.8, 141.7, 136.4, 116.7, 112.3, 110.4, 106.5, 70.5, 44.4, 40.1, 14.6; high resolution mass spectrum (ES<sup>+</sup>) *m/z* 215.1046 [(M+Na)<sup>+</sup>; calcd for C<sub>12</sub>H<sub>16</sub>ONa: 215.1048].

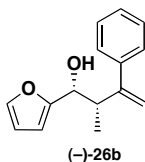

**Compound (–)-26b.** To a solution of furan (58.2 μL, 0.81 mmol, 2.0 equiv.) in THF (0.5 mL) was added *n*-BuLi (2.2 M in hexane, 0.36 mL, 0.81 mmol, 2.0 equiv.) at –15 °C. After the addition was complete, the reaction mixture was stirred for an additional 30 min. The resulting solution was warmed to 0 °C, and stirred for 1.5 h. After cooling to –78 °C, linchpin (+)-**13** (63 mg, 0.40 mmol, 1.0 equiv.) dissolved in Et<sub>2</sub>O (0.5 mL) was added dropwise to the reaction mixture. After being stirred for 30 min, the resulting solution was added to a mixture of CuI (152.3 mg, 0.81 mmol, 2.0 equiv.) in HMPA/THF (1 mL/1 mL) via cannula at 0 °C, and allowed to warm to room temperature. After stirring for 2 h at room temperature, phenyl iodide (0.09 mL, 0.81 mmol, 2.0 equiv.) and Pd(PPh<sub>3</sub>)<sub>4</sub> (13.9 mg, 0.012 mmol, 0.03 equiv.) in THF (1 mL) were added. After 12 h, TBAF (1.62 mL, 1.62 mmol, 4.0 equiv.) was added. After 1 h, a saturated aqueous NH<sub>4</sub>Cl (3 mL) solution was added, and the resulting mixture was extracted with Et<sub>2</sub>O (10 mL x 2) and CH<sub>2</sub>Cl<sub>2</sub> (10 mL x 2). The combined organic layers were washed with brine, dried over MgSO<sub>4</sub>, filtered and concentrated *in vacuo*. Flash chromatography (ethyl acetate/hexane = 1/10), afforded (–)-**26b** (52.9 mg, 0.23 mmol, 58% yield) as a colorless oil. R<sub>f</sub> 0.22 (hexane/ethyl acetate = 10/1); [α]<sup>18</sup><sub>D</sub> –

12.3 (*c* 0.81, C<sub>6</sub>D<sub>6</sub>); IR (film) 3412 (m), 3081 (w), 3054 (w), 3025 (w), 2974 (s), 2927 (s), 1627 (w), 1403 (s), 1147 (w), 1010 (s), 903 (m) cm<sup>-1</sup>; <sup>1</sup>H NMR (500 MHz, C<sub>6</sub>D<sub>6</sub>) δ 7.33 (m, 2H), 7.25-7.10 (m, 4H), 6.20 (dd, *J* = 3.0 and 0.5 Hz, 1H), 6.12 (dd, *J* = 3.0 and 2.0 Hz, 1H), 5.32 (d, *J* = 1.0 Hz, 1H), 5.12 (d, *J* = 1.0 Hz, 1H), 4.70 (d, *J* = 4.0 Hz, 1H), 3.38 (m, 1H), 1.43 (br, 1H), 1.30 (d, *J* = 7.0 Hz, 3H); <sup>13</sup>C NMR (125 MHz, C<sub>6</sub>D<sub>6</sub>) δ 156.8, 151.6, 142.6, 141.3, 128.5, 127.6, 127.0, 113.9, 110.4, 106.4, 70.3, 43.2, 14.2; high resolution mass spectrum (ES<sup>+</sup>) *m/z* 251.1040 [(M+Na)<sup>+</sup>; calcd for C<sub>15</sub>H<sub>16</sub>ONa: 251.1048].

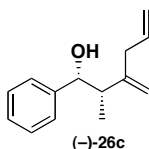

**Compound (-)-26c.** Using conditions similar to those used for (-)-26a, linchpin (+)-13 (63.0 mg, 0.40 mmol, 1.0 equiv.) afforded (-)-26c (50.9 mg, 0.25 mmol, 63% yield) as a colorless oil after flash chromatography (ethyl acetate/hexane = 1/10). R<sub>f</sub> 0.25 (hexane/ethyl acetate = 10/1); [α]<sup>18</sup><sub>D</sub> -34.1 (*c* 0.7, CHCl<sub>3</sub>); IR (film) 3426 (s), 3077 (w), 3030 (w), 2977 (s), 2916 (s), 1642 (m), 1452 (m), 1017 (m), 998 (m) cm<sup>-1</sup>; <sup>1</sup>H NMR (500 MHz, CDCl<sub>3</sub>) δ 7.40-7.20 (m, 5H), 5.78 (m, 1H), 5.09 (d, *J* = 1.0 Hz, 1H), 5.06 (d, *J* = 6.0 Hz, 1H), 4.97 (d, *J* = 8.5 Hz, 2H), 4.77 (d, *J* = 5.0 Hz, 1H), 2.80 (dd, *J* = 15.5 and 7.0 Hz, 1H), 2.74 (dd, *J* = 15.5 and 7.0 Hz, 1H), 2.53 (q, *J* = 7.0 Hz, 1H), 1.95 (br, 1H), 1.01 (d, *J* = 7.0 Hz, 3H); <sup>13</sup>C NMR (125 MHz, CDCl<sub>3</sub>) δ 150.3, 143.1, 136.4, 128.3, 127.3, 126.8, 116.8, 112.3, 74.9, 46.4, 40.9, 13.2; high resolution mass spectrum (ES<sup>+</sup>) *m/z* 225.1250 [(M+Na)<sup>+</sup>; calcd for C<sub>14</sub>H<sub>18</sub>ONa: 225.1255].

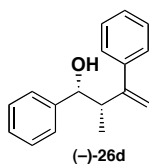

**Compound (-)-26d.** Using conditions similar to those used for (-)-26b, linchpin (+)-13 (63.0 mg, 0.40 mmol, 1.0 equiv.) afforded (-)-26d (56.2 mg, 0.24 mmol, 59% yield) as a pale yellow oil after flash chromatography (ethyl acetate/hexane = 1/10). R<sub>f</sub> 0.24 (hexane/ethyl acetate = 10/1); [α]<sup>18</sup><sub>D</sub> -39.9 (*c* 1.5, C<sub>6</sub>D<sub>6</sub>); IR (film) 3427 (m), 3083 (w), 3028 (w), 2975 (s), 2929 (s), 1623 (w), 1494



(m), 1451 (m), 1059 (m), 1028 (m)  $\text{cm}^{-1}$ ;  $^1\text{H}$  NMR (500 MHz,  $\text{C}_6\text{D}_6$ )  $\delta$  7.38 (d,  $J = 8.5$  Hz, 2H), 7.30-7.10 (m, 8H), 5.33 (d,  $J = 1.0$  Hz, 1H), 5.15 (d,  $J = 1.0$  Hz, 1H), 4.69 (d,  $J = 3.5$  Hz, 1H), 3.12 (m, 1H), 1.50 (br, 1H), 1.20 (d,  $J = 7.0$  Hz, 3H);  $^{13}\text{C}$  NMR (125 MHz,  $\text{CDCl}_3$ )  $\delta$  152.0, 143.0, 142.4, 128.7, 128.3, 127.8, 127.2, 126.9, 126.1, 114.4, 74.2, 45.6, 12.3; high resolution mass spectrum ( $\text{ES}^+$ )  $m/z$  261.1247 [(M+Na) $^+$ ; calcd for  $\text{C}_{17}\text{H}_{18}\text{ONa}$ : 261.1255].

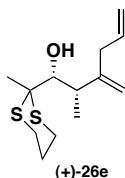

**Compound (+)-26e.** Using conditions similar to those used for (–)-26a, linchpin (+)-13 (63.0 mg, 0.40 mmol, 1.0 equiv.) afforded (+)-26e (54.7 mg, 0.21 mmol, 53% yield) as a pale yellow oil after flash chromatography (ethyl acetate/hexane = 1/10).  $R_f$  0.43 (hexane/ethyl acetate = 10/1);  $[\alpha]_D^{18}$  +7.6 ( $c$  0.4,  $\text{CHCl}_3$ ); IR (film) 3481 (m), 3075 (w), 2975 (s), 2931 (s), 2911 (s), 1640 (m), 1424 (m), 1240 (m), 1031 (m), 908 (s)  $\text{cm}^{-1}$ ;  $^1\text{H}$  NMR (500 MHz,  $\text{CDCl}_3$ )  $\delta$  5.88 (m, 1H), 5.10 (dd,  $J = 19.0$  and 2.0 Hz, 1H), 5.07 (dd,  $J = 10.0$  and 1.0 Hz, 1H), 5.00 (s, 1H), 4.82 (s, 1H), 4.00 (s, 1H), 3.00-2.85 (m, 5H), 2.67-2.59 (m, 3H), 2.08 (m, 1H), 1.85 (m, 1H), 1.47 (s, 3H), 1.20 (d,  $J = 7.0$  Hz, 3H);  $^{13}\text{C}$  NMR (125 MHz,  $\text{CDCl}_3$ )  $\delta$  153.9, 136.9, 116.4, 110.5, 72.6, 55.2, 39.6, 39.2, 26.7, 26.1, 24.5, 22.8, 15.2; high resolution mass spectrum ( $\text{ES}^+$ )  $m/z$  281.1002 [(M+Na) $^+$ ; calcd for  $\text{C}_{13}\text{H}_{22}\text{ONaS}_2$ : 281.1010].

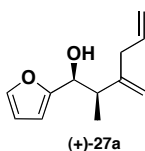

**Compound (+)-27a.** Using conditions similar to those used for (–)-26a, linchpin (–)-14 (63.0 mg, 0.40 mmol, 1.0 equiv.) afforded (+)-27a (45.3 mg, 0.24 mmol, 59% yield) as a colorless oil after flash chromatography (ethyl acetate/hexane = 1/10).  $R_f$  0.41 (hexane/ethyl acetate = 10/1);  $[\alpha]_D^{18}$  +15.6 ( $c$  1.6,  $\text{CHCl}_3$ ); IR (film) 3420 (m), 3078 (w), 2978 (s), 2915 (s), 1642 (w), 1506 (m), 1149 (m), 1010 (s), 914 (m)  $\text{cm}^{-1}$ ;  $^1\text{H}$  NMR (500 MHz,  $\text{CDCl}_3$ )  $\delta$  7.36 (dd,  $J = 1.0$  and 0.5 Hz, 1H), 6.33 (dd,  $J = 3.0$  and 2.0 Hz, 1H), 6.23 (dd,  $J = 3.0$  and 0.5 Hz, 1H), 5.77 (m, 1H), 5.07 (s, 1H), 5.04

(d,  $J = 8.0$  Hz, 1H), 4.92 (d,  $J = 6.0$  Hz, 2H), 4.71 (d,  $J = 6.0$  Hz, 1H), 3.27 (m, 3H), 1.95 (br, 1H), 1.12 (d,  $J = 7.0$  Hz, 3H);  $^{13}\text{C}$  NMR (125 MHz,  $\text{CDCl}_3$ )  $\delta$  155.8, 149.8, 141.7, 136.4, 116.7, 112.3, 110.4, 106.5, 70.5, 44.4, 40.1, 14.6; high resolution mass spectrum ( $\text{ES}^+$ )  $m/z$  215.1042 [(M+Na) $^+$ ; calcd for  $\text{C}_{12}\text{H}_{16}\text{ONa}$ : 215.1048].

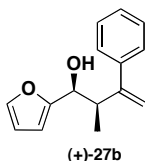

**Compound (+)-27b.** Using conditions similar to those used for (–)-26b, linchpin (–)-14 (63.0 mg, 0.40 mmol, 1.0 equiv.) afforded (+)-27b (50.2 mg, 0.22 mmol, 55% yield) as a pale yellow oil after flash chromatography (ethyl acetate/hexane = 1/10).  $R_f$  0.22 (hexane/ethyl acetate = 10/1);  $[\alpha]_D^{18} +12.1$  ( $c$  0.82,  $\text{C}_6\text{D}_6$ ); IR (film) 3420 (m), 3054 (w), 3025 (w), 2974 (s), 2928 (s), 1623 (w), 1404 (s), 1147 (w), 1009 (s), 903 (m)  $\text{cm}^{-1}$ ;  $^1\text{H}$  NMR (500 MHz,  $\text{C}_6\text{D}_6$ )  $\delta$  7.33 (m, 2H), 7.25–7.10 (m, 4H), 6.20 (dd,  $J = 3.0$  and 0.5 Hz, 1H), 6.12 (dd,  $J = 3.0$  and 2.0 Hz, 1H), 5.32 (d,  $J = 1.0$  Hz, 1H), 5.12 (d,  $J = 1.0$  Hz, 1H), 4.70 (d,  $J = 4.0$  Hz, 1H), 3.38 (m, 1H), 1.47 (br, 1H), 1.30 (d,  $J = 7.0$  Hz, 3H);  $^{13}\text{C}$  NMR (125 MHz,  $\text{C}_6\text{D}_6$ )  $\delta$  156.8, 151.6, 142.6, 141.3, 128.5, 127.6, 127.0, 113.9, 110.4, 106.4, 70.3, 43.2, 14.2; high resolution mass spectrum ( $\text{ES}^+$ )  $m/z$  251.1046 [(M+Na) $^+$ ; calcd for  $\text{C}_{15}\text{H}_{16}\text{ONa}$ : 251.1048].

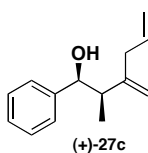

**Compound (+)-27c.** Using conditions similar to those used for (–)-26a, linchpin (–)-14 (63.0 mg, 0.40 mmol, 1.0 equiv.) afforded (+)-27c (49.3 mg, 0.24 mmol, 61% yield) as a colorless oil after flash chromatography (ethyl acetate/hexane = 1/10).  $R_f$  0.25 (hexane/ethyl acetate = 10/1);  $[\alpha]_D^{18} +30.0$  ( $c$  0.9,  $\text{CHCl}_3$ ); IR (film) 3422 (s), 3077 (w), 3030 (w), 2977 (s), 2915 (s), 1641 (m), 1452 (m), 1015 (m), 998 (m)  $\text{cm}^{-1}$ ;  $^1\text{H}$  NMR (500 MHz,  $\text{CDCl}_3$ )  $\delta$  7.40–7.20 (m, 5H), 5.78 (m, 1H), 5.09 (d,  $J = 1.0$  Hz, 1H), 5.06 (d,  $J = 6.0$  Hz, 1H), 4.97 (d,  $J = 8.5$  Hz, 2H), 4.77 (d,  $J = 5.0$  Hz, 1H), 2.80 (dd,  $J = 15.5$  and 7.0 Hz, 1H), 2.74 (dd,  $J = 15.5$  and 7.0 Hz, 1H), 2.53 (q,  $J = 7.0$  Hz, 1H),

1.95 (br, 1H), 1.01 (d,  $J = 7.0$  Hz, 3H);  $^{13}\text{C}$  NMR (125 MHz,  $\text{CDCl}_3$ )  $\delta$  150.3, 143.1, 136.4, 128.3, 127.3, 126.8, 116.8, 112.3, 74.9, 46.4, 40.9, 13.2; high resolution mass spectrum ( $\text{ES}^+$ )  $m/z$  225.1262 [( $\text{M}+\text{Na}$ ) $^+$ ; calcd for  $\text{C}_{14}\text{H}_{18}\text{ONa}$ : 225.1255].

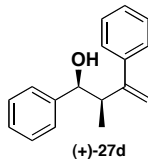

**Compound (+)-27d.** Using conditions similar to those used for (–)-26b, linchpin (–)-14 (63.0 mg, 0.40 mmol, 1.0 equiv.) afforded (+)-27d (54.3 mg, 0.23 mmol, 57% yield) as a pale yellow oil after flash chromatography (ethyl acetate/hexane = 1/10).  $R_f$  0.24 (hexane/ethyl acetate = 10/1);  $[\alpha]_D^{18}$  +45.0 ( $c$  2.0,  $\text{C}_6\text{D}_6$ ); IR (film) 3437 (m), 3080 (w), 3028 (w), 2975 (s), 2929 (s), 1624 (w), 1494 (m), 1451 (m), 1059 (m), 1028 (m)  $\text{cm}^{-1}$ ;  $^1\text{H}$  NMR (500 MHz,  $\text{C}_6\text{D}_6$ )  $\delta$  7.38 (d,  $J = 8.5$  Hz, 2H), 7.30-7.10 (m, 8H), 5.33 (d,  $J = 1.0$  Hz, 1H), 5.15 (d,  $J = 1.0$  Hz, 1H), 4.69 (d,  $J = 3.5$  Hz, 1H), 3.12 (m, 1H), 1.51 (br, 1H), 1.20 (d,  $J = 7.0$  Hz, 3H);  $^{13}\text{C}$  NMR (125 MHz,  $\text{CDCl}_3$ )  $\delta$  152.0, 143.0, 142.4, 128.7, 128.3, 127.8, 127.2, 126.9, 126.1, 114.4, 74.2, 45.6, 12.3; high resolution mass spectrum ( $\text{ES}^+$ )  $m/z$  261.1245 [( $\text{M}+\text{Na}$ ) $^+$ ; calcd for  $\text{C}_{17}\text{H}_{18}\text{ONa}$ : 261.1255].

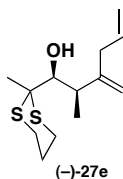

**Compound (–)-27e.** Using conditions similar to those used for (–)-26a, linchpin (–)-14 (63.0 mg, 0.40 mmol, 1.0 equiv.) afforded (–)-27e (51.6 mg, 0.20 mmol, 50% yield) as a pale yellow oil after flash chromatography (ethyl acetate/hexane = 1/10).  $R_f$  0.43 (hexane/ethyl acetate = 10/1);  $[\alpha]_D^{18}$  –14.6 ( $c$  0.48,  $\text{CHCl}_3$ ); IR (film) 3479 (m), 3075 (w), 2975 (s), 2931 (s), 2912 (s), 1640 (m), 1425 (m), 1240 (m), 1031 (m), 908 (s)  $\text{cm}^{-1}$ ;  $^1\text{H}$  NMR (500 MHz,  $\text{CDCl}_3$ )  $\delta$  5.88 (m, 1H), 5.10 (dd,  $J = 19.0$  and  $2.0$  Hz, 1H), 5.07 (dd,  $J = 10.0$  and  $1.0$  Hz, 1H), 5.00 (s, 1H), 4.82 (s, 1H), 3.99 (d,  $J = 2.0$  Hz, 1H), 3.00-2.85 (m, 5H), 2.67-2.59 (m, 3H), 2.08 (m, 1H), 1.85 (m, 1H), 1.47 (s, 3H), 1.20 (d,  $J = 7.0$  Hz, 3H);  $^{13}\text{C}$  NMR (125 MHz,  $\text{CDCl}_3$ )  $\delta$  153.9, 136.9, 116.4, 110.5, 72.6, 55.1, 39.6,

39.2, 26.7, 26.1, 24.5, 22.8, 15.2; high resolution mass spectrum (ES<sup>+</sup>)  $m/z$  281.0999 [(M+Na)<sup>+</sup>; calcd for C<sub>13</sub>H<sub>22</sub>ONaS<sub>2</sub>: 281.1010].

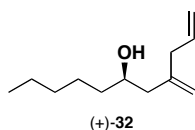

**Compound (+)-32.** To a suspension of CuI (0.1 g, 0.52 mmol, 1.2 equiv.) in Et<sub>2</sub>O (1.5 mL) at -40 °C was added *n*-BuLi (2.5 in hexane, 0.42 mL, 1.05 mmol, 2.4 equiv.) dropwise. The reaction mixture was then allowed to warm to 0 °C over 1 h. The resulting solution was cooled to -70 °C and a solution of epoxide (-)-15 (68.5 mg, 0.44 mmol, 1.0 equiv.) in THF (1 mL) was added. The reaction mixture was allowed to warm to 0 °C over 1 h. After being stirred for 1 h, the resulting solution was added to a mixture of CuI (0.1 g, 0.52 mmol, 1.2 equiv.) in HMPA/THF (1 mL/1 mL) via cannula at 0 °C. The resulting solution was then warmed to room temperature. After stirring for 2 h at room temperature, allyl bromide (0.08 mL, 0.88 mmol, 2.0 equiv.) was added. After being stirred for 12 h at room temperature, 3 mL of 1N HCl was added. After 10 min, a saturated aqueous NH<sub>4</sub>Cl (3 mL) solution was added, and the resulting mixture was extracted with Et<sub>2</sub>O (10 mL x 2) and CH<sub>2</sub>Cl<sub>2</sub> (10 mL x 2). The combined organic layers were washed with brine, dried over MgSO<sub>4</sub>, filtered and concentrated *in vacuo*. Flash chromatography (diethyl ether/hexane = 1/10) afforded (+)-32 (38.4 mg, 0.21 mmol, 48% yield) as a pale yellow oil. R<sub>f</sub> 0.3 (hexane/diethyl ether = 5/1); [α]<sub>D</sub><sup>20</sup> +4.61 (*c* 0.42, CHCl<sub>3</sub>); IR (film) 3387 (m), 3078 (m), 2956 (s), 2930 (s), 2858 (s), 1642 (m), 1434 (m), 1125 (m), 1041 (m) cm<sup>-1</sup>; <sup>1</sup>H NMR (500 MHz, CDCl<sub>3</sub>) δ 5.85-5.77 (m, 1H), 5.09-5.07 (m, 1H), 5.05 (d, *J* = 1.0 Hz, 1H), 4.92 (d, *J* = 1.5 Hz, 1H), 4.89 (s, 1H), 3.74-3.69 (m, 1H), 2.79 (ddd, *J* = 22.0, 15.5 and 6.5 Hz, 2H), 2.26 (dd, *J* = 14.0 and 3.5 Hz, 1H), 2.07 (dd, *J* = 14.0 and 9.5 Hz, 1H), 1.68 (br, 1H), 1.49-1.43 (m, 3H), 1.36-1.27 (m, 5H), 0.89 (t, *J* = 7.0 Hz, 3H); <sup>13</sup>C NMR (125 MHz, CDCl<sub>3</sub>) δ 145.1, 135.9, 116.6, 113.5, 68.8, 44.4, 40.6, 37.1, 31.9, 25.4, 22.6, 14.0; high resolution mass spectrum (ES<sup>+</sup>)  $m/z$  205.1577 [(M+Na)<sup>+</sup>; calcd for C<sub>12</sub>H<sub>22</sub>ONa: 205.1568].

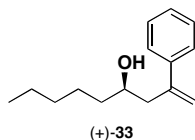

**Compound (+)-33.** To a suspension of CuI (98.2 mg, 0.51 mmol, 1.2 equiv.) in Et<sub>2</sub>O (1.5 mL) at –40 °C was added *n*-BuLi (2.5 in hexane, 0.41 mL, 1.02 mmol, 2.4 equiv.) dropwise. The reaction mixture was then allowed to warm to 0 °C over 1 h. The resulting solution was cooled to –70 °C and a solution of epoxide (–)-15 (67.2 mg, 0.43 mmol, 1.0 equiv.) in THF (1 mL) was added. The reaction mixture was then warmed to 0 °C over 1 h. After stirring for 1 h, the resulting solution was added to a mixture of CuI (98.2 g, 0.51 mmol, 1.2 equiv.) in HMPA/THF (1 mL/1 mL) via cannula at 0 °C. The resulting solution was warmed to room temperature. After stirring for 2 h at room temperature, phenyl iodide (0.98 mL, 0.86 mmol, 2.0 equiv.) and Pd(PPh<sub>3</sub>)<sub>4</sub> (15.0 mg, 0.013 mmol, 0.03 equiv.) in THF (1 mL) were added. After being stirred for 12 h at room temperature, 3 mL of 1N HCl was added. After 10 min, a saturated aqueous NH<sub>4</sub>Cl (3 mL) solution was added, and the resulting mixture extracted with Et<sub>2</sub>O (10 mL x 2) and CH<sub>2</sub>Cl<sub>2</sub> (10 mL x 2). The combined organic layers were washed with brine, dried over MgSO<sub>4</sub>, filtered and concentrated *in vacuo*. Flash chromatography (diethyl ether/hexane = 1/10) afforded (+)-33 (39.5 mg, 0.19 mmol, 45% yield) as a pale yellow oil. R<sub>f</sub> 0.23 (hexane/diethyl ether = 5/1); [α]<sub>D</sub><sup>18</sup> +23.1 (*c* 1.0, CHCl<sub>3</sub>); IR (film) 3392 (m), 3082 (w), 3057 (w), 3026 (w), 2930 (s), 2858 (s), 1705 (w), 1626 (m), 1448 (m), 1031 (m) cm<sup>-1</sup>; <sup>1</sup>H NMR (500 MHz, CDCl<sub>3</sub>) δ 7.42-7.40 (m, 2H), 7.36-7.33 (m, 2H), 7.30-7.29 (m, 1H), 5.41 (d, *J* = 1.5 Hz, 1H), 5.17 (d, *J* = 1.0 Hz, 1H), 3.67-3.62 (m, 1H), 2.81 (dd, *J* = 14.0 and 4.0 Hz, 1H), 2.51 (dd, *J* = 14.0 and 9.0 Hz, 1H), 1.64 (br, 1H), 1.51-1.42 (m, 3H), 1.35-1.24 (m, 5H), 0.88 (t, *J* = 7.0 Hz, 3H); <sup>13</sup>C NMR (125 MHz, CDCl<sub>3</sub>) δ 145.5, 140.5, 128.4, 127.7, 126.2, 115.2, 69.4, 43.8, 36.9, 31.8, 25.3, 22.6, 14.0; high resolution mass spectrum (ES<sup>+</sup>) *m/z* 241.1559 [(M+Na)<sup>+</sup>; calcd for C<sub>15</sub>H<sub>22</sub>ONa: 241.1568].

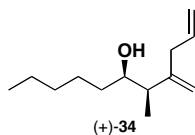

**Compound (+)-34.** Using conditions similar to those used for (+)-32, linchpin (+)-16 (68.0 mg, 0.40 mmol, 1.0 equiv.) afforded (+)-34 (53.3 mg, 0.27 mmol, 68% yield) as a colorless oil after flash chromatography (ethyl acetate/hexane = 1/10).  $R_f$  0.32 (hexane/ethyl acetate = 10/1);  $[\alpha]_D^{18}$  +40.5 ( $c$  3.2,  $C_6D_6$ ); IR (film) 3391 (m), 3082 (w), 2962 (s), 2930 (s), 2851 (m), 1640 (m), 1463 (m), 1403 (s), 1022 (w), 912 (w)  $cm^{-1}$ ;  $^1H$  NMR (500 MHz,  $C_6D_6$ )  $\delta$  5.79-5.71 (m, 1H), 5.02 (d,  $J$  = 1.0 Hz, 1H), 4.99 (ddd,  $J$  = 7.0, 2.0 and 1.0 Hz, 1H), 4.86 (dd,  $J$  = 2.5 and 1.0 Hz, 1H), 4.84 (s, 1H), 3.46-3.42 (m, 1H), 2.66 (ddd,  $J$  = 37.2, 15.9 and 6.5 Hz, 2H), 2.62 (dd,  $J$  = 16.0 and 7.5 Hz, 1H), 1.52-1.37 (m, 3H), 1.32-1.22 (m, 5H), 1.15 (br, 1H), 1.05 (d,  $J$  = 7.0 Hz, 3H), 0.90 (t,  $J$  = 7.0 Hz, 3H);  $^{13}C$  NMR (125 MHz,  $C_6D_6$ )  $\delta$  151.6, 137.0, 116.8, 111.7, 72.9, 45.6, 40.7, 35.6, 32.6, 26.7, 23.5, 14.7, 14.1; high resolution mass spectrum (ES<sup>+</sup>)  $m/z$  219.1719 [(M+Na)<sup>+</sup>; calcd for  $C_{13}H_{24}ONa$ : 219.1725].

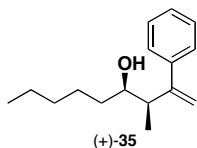

**Compound (+)-35.** Using conditions similar to those used for (+)-33, linchpin (+)-16 (68.0 mg, 0.40 mmol, 1.0 equiv.) afforded (+)-35 (58.5 mg, 0.25 mmol, 63% yield) as a pale yellow oil after flash chromatography (ethyl acetate/hexane = 1/10).  $R_f$  0.30 (hexane/ethyl acetate = 10/1);  $[\alpha]_D^{18}$  +24.7 ( $c$  0.6,  $C_6D_6$ ); IR (film) 3391 (m), 3082 (w), 3059 (w), 3025 (w), 2958 (s), 2930 (s), 1624 (w), 1460 (m), 1403 (s), 1024 (m), 900 (m)  $cm^{-1}$ ;  $^1H$  NMR (500 MHz,  $C_6D_6$ )  $\delta$  7.22 (d,  $J$  = 6.0 Hz, 2H), 7.20-7.05 (m, 3H), 5.25 (d,  $J$  = 1.0 Hz, 1H), 5.02 (d,  $J$  = 1.0 Hz, 1H), 3.47 (m, 1H), 2.69 (m, 1H), 1.50-1.32 (m, 3H), 1.30-1.02 (m, 5H), 1.18 (d,  $J$  = 7.0 Hz, 3H), 0.85 (t,  $J$  = 7.0 Hz, 3H), 0.42 (br, 1H);  $^{13}C$  NMR (125 MHz,  $C_6D_6$ )  $\delta$  153.5, 143.4, 129.0, 128.7, 128.3, 128.0, 127.4, 113.6, 73.0, 44.1, 35.7, 32.6, 26.7, 23.4, 14.6, 13.8; high resolution mass spectrum (ES<sup>+</sup>)  $m/z$  255.1720 [(M+Na)<sup>+</sup>; calcd for  $C_{16}H_{24}ONa$ : 255.1725].

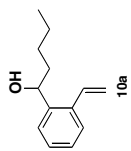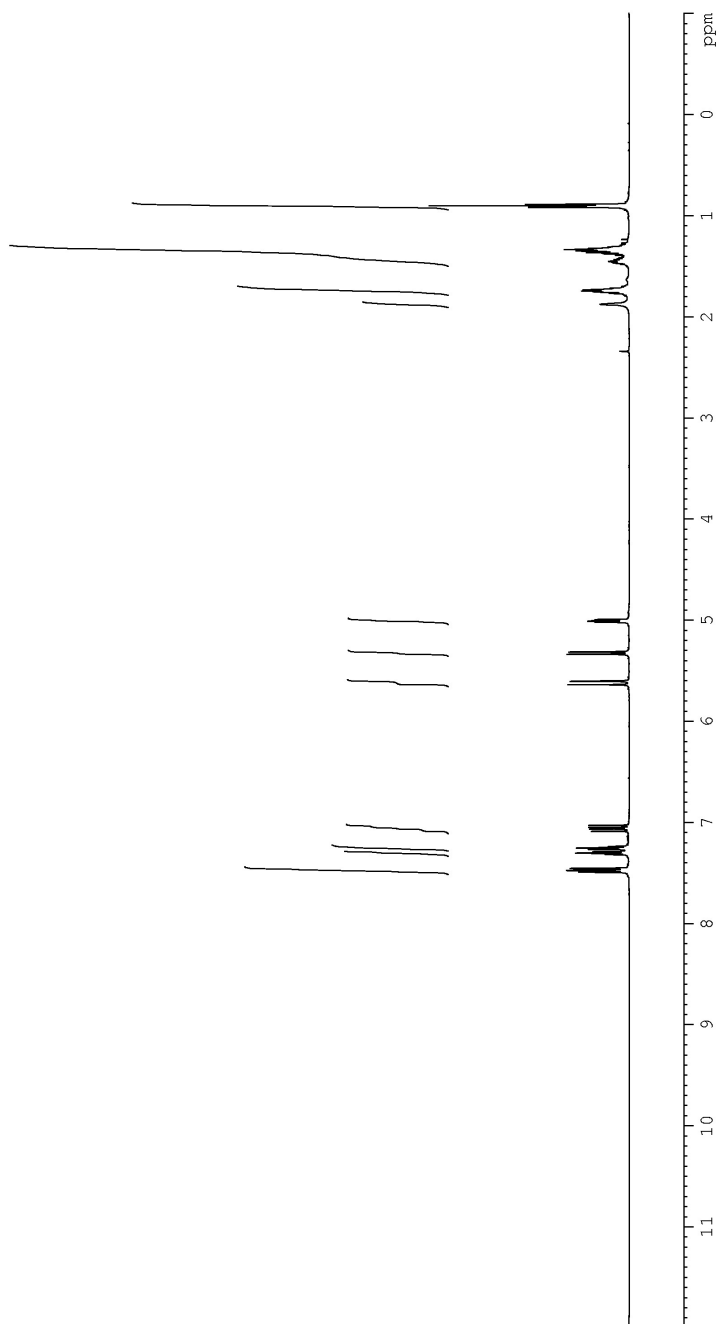





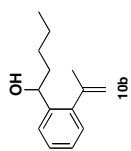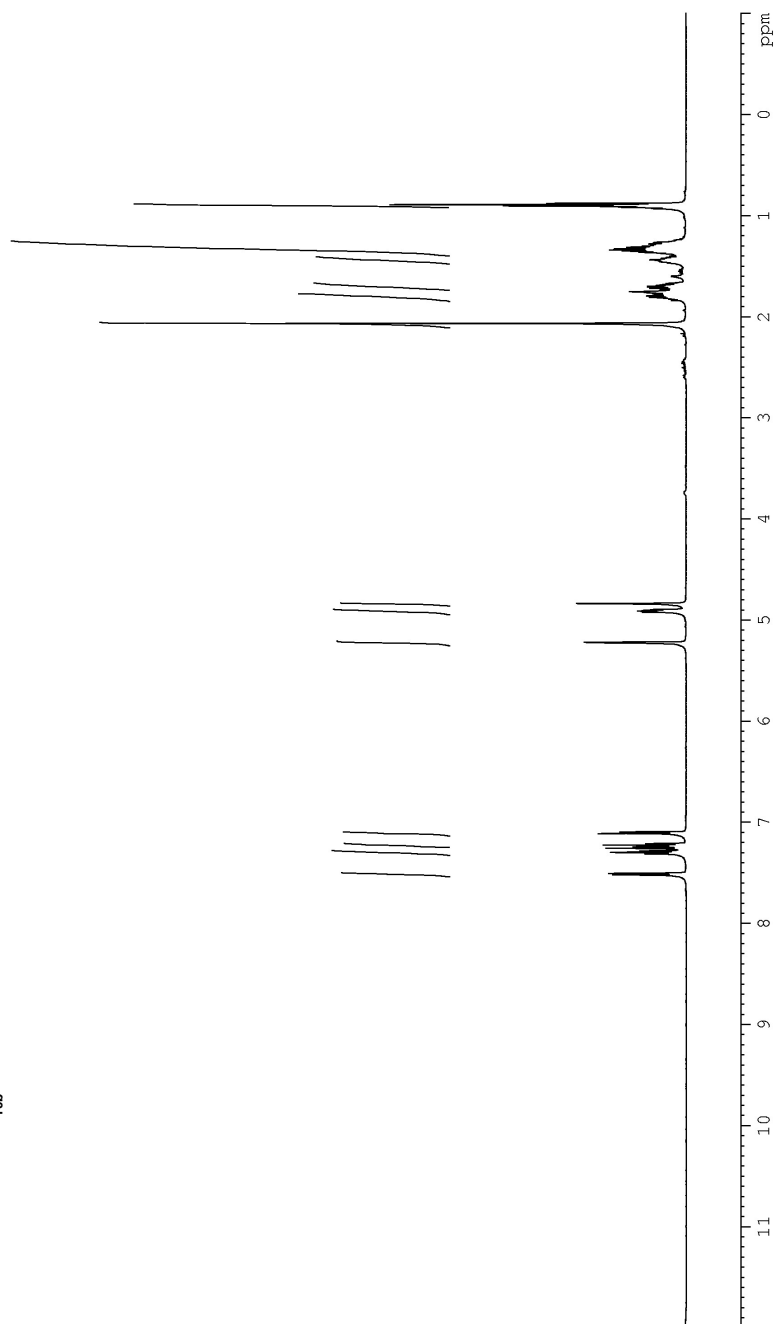

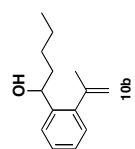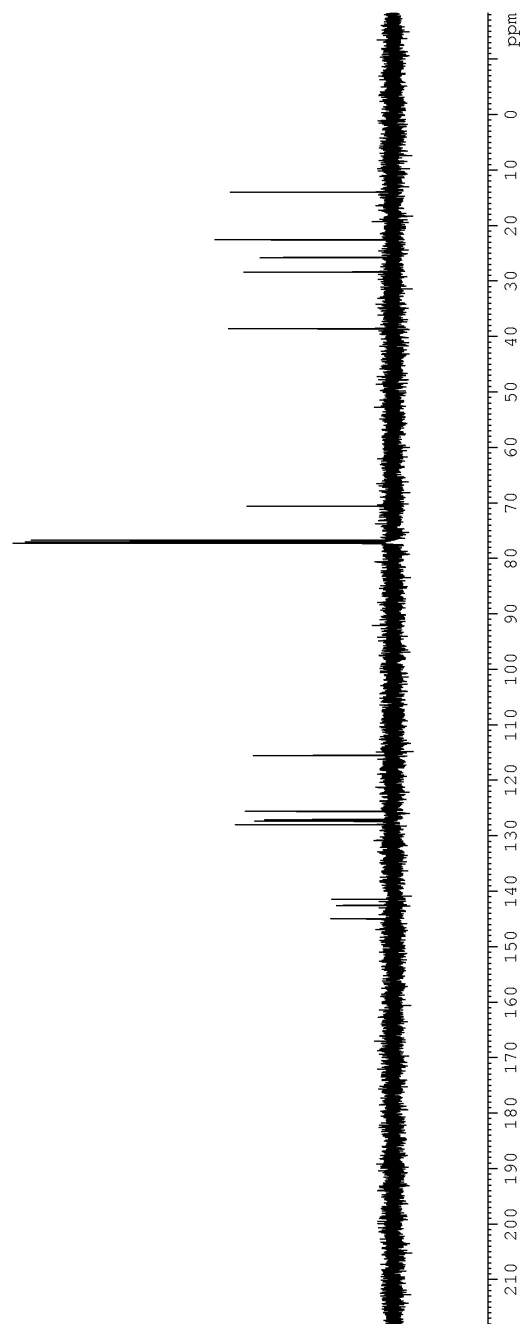

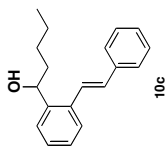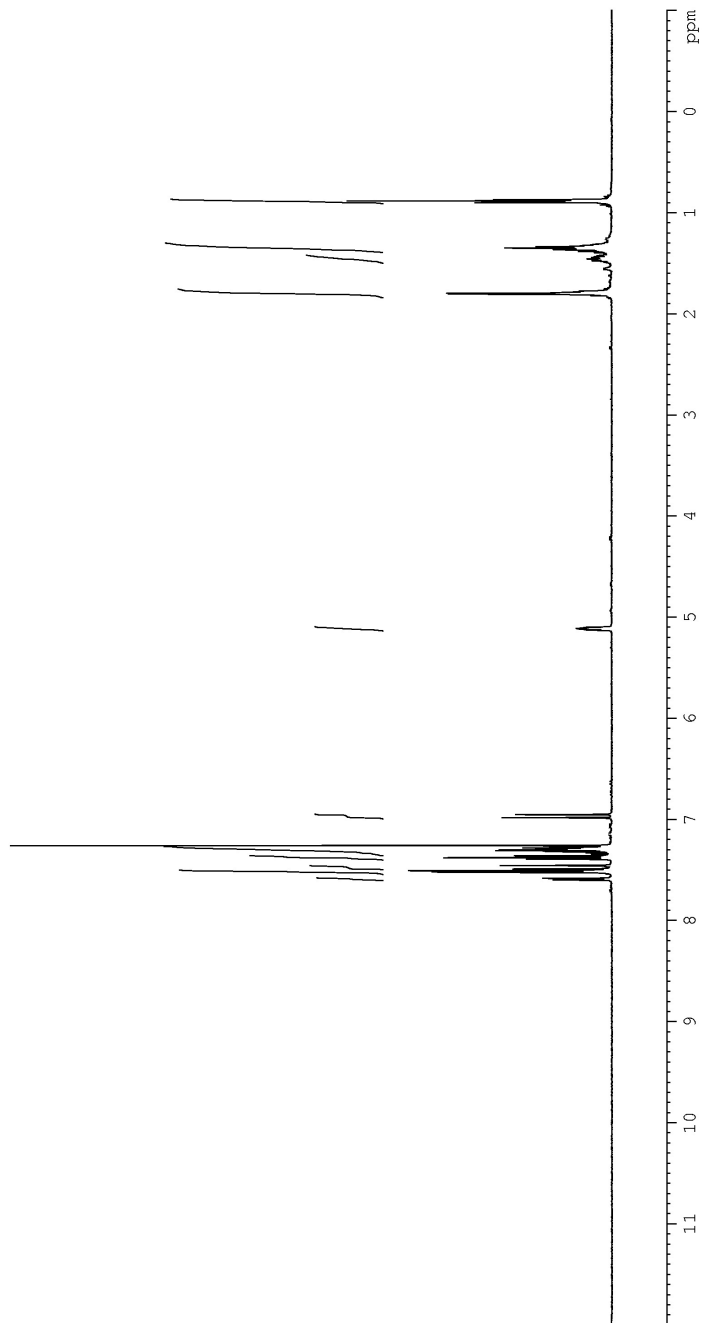

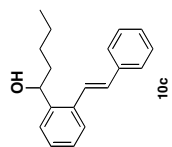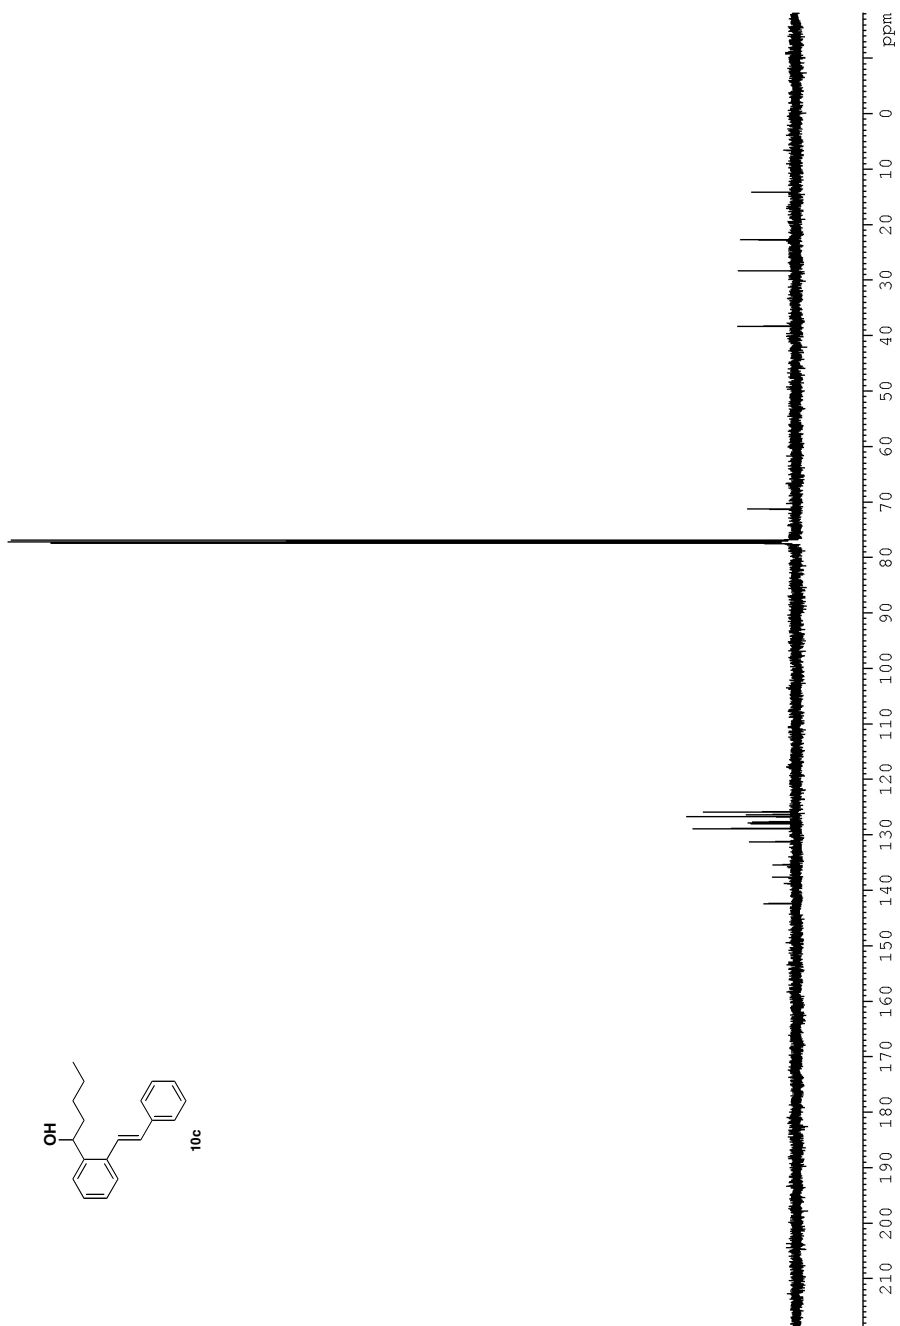

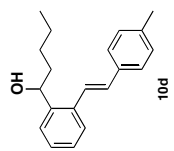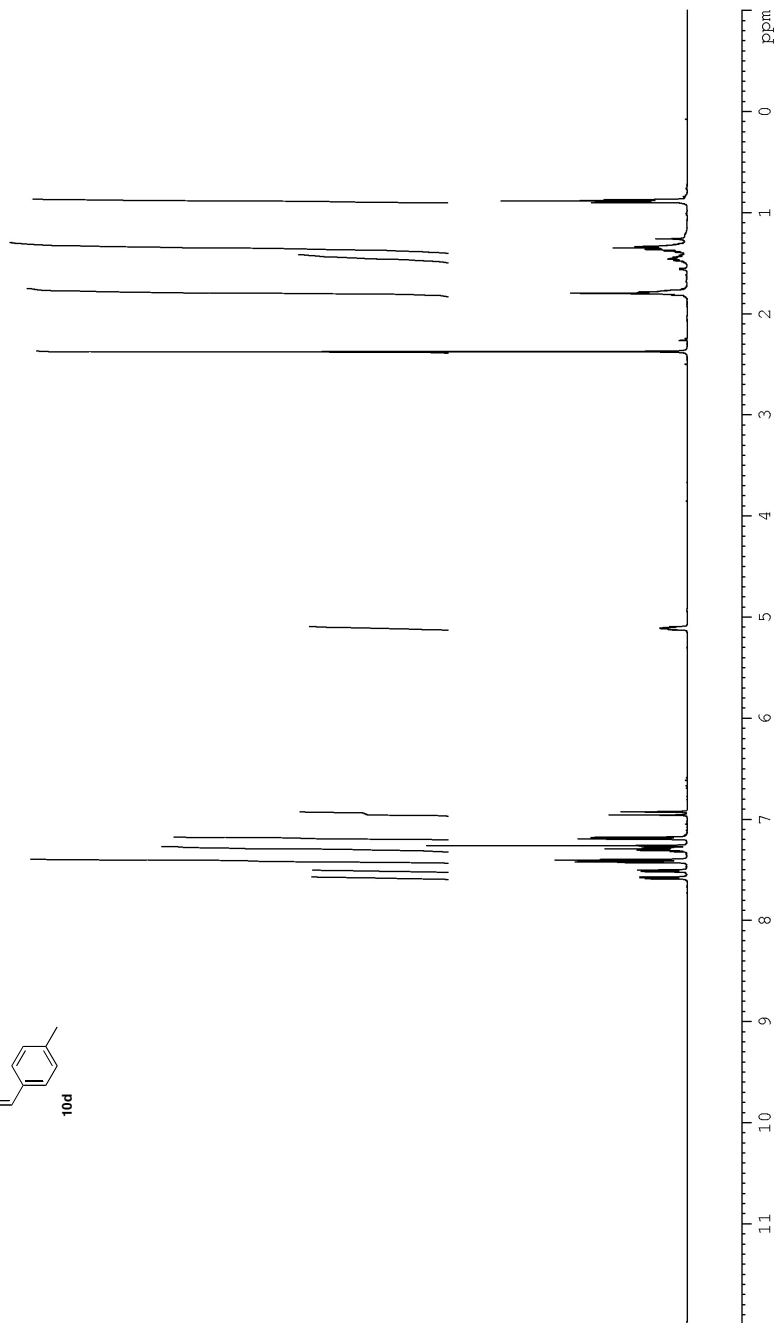

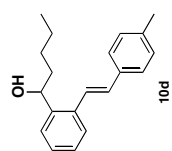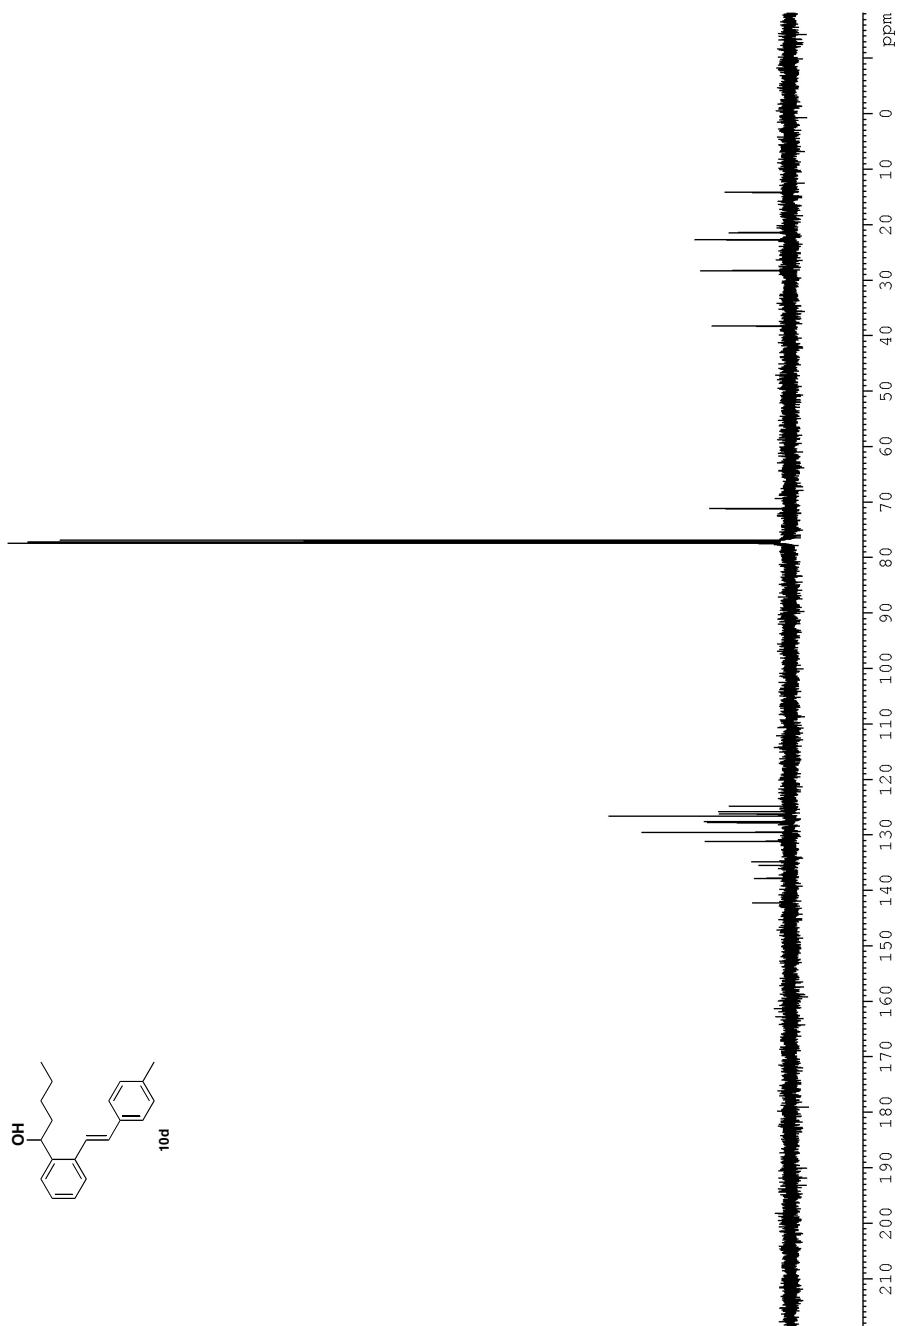

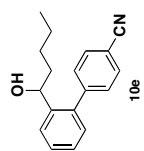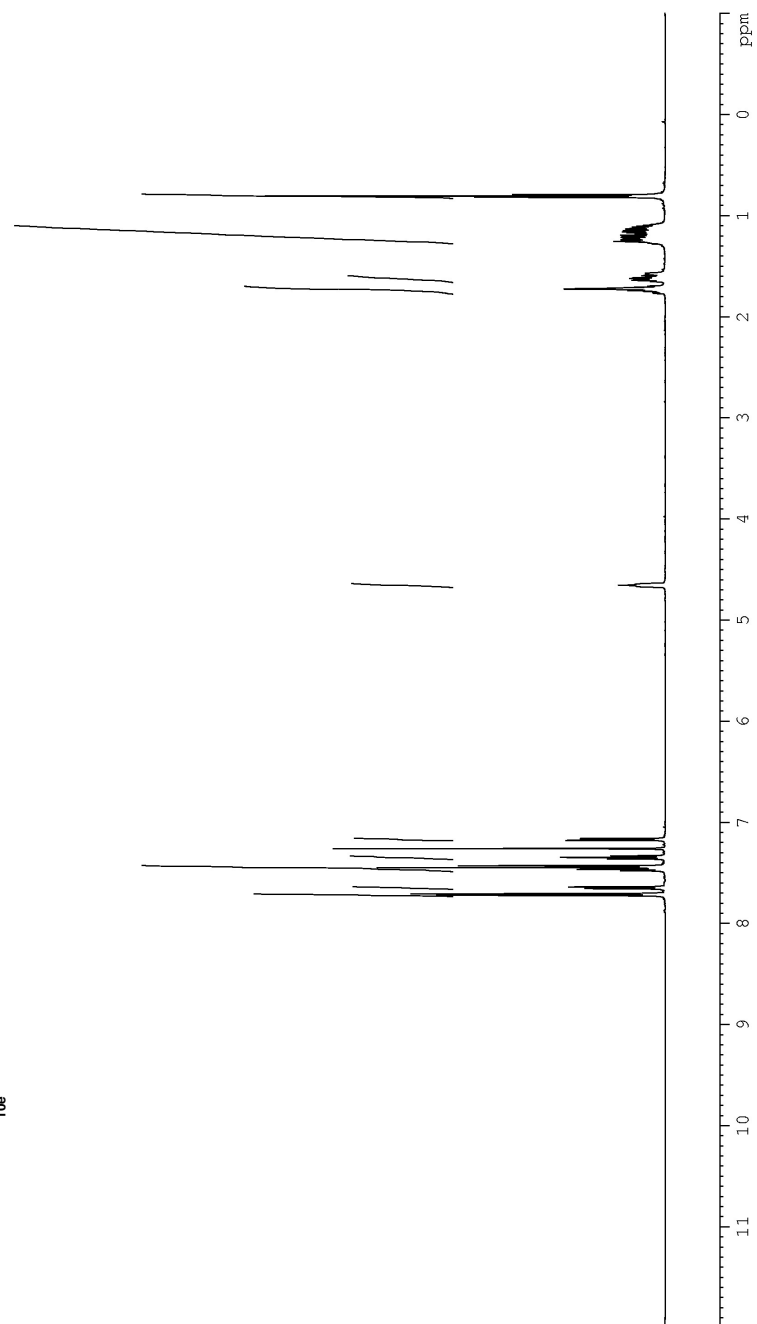

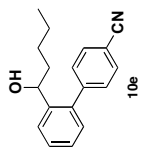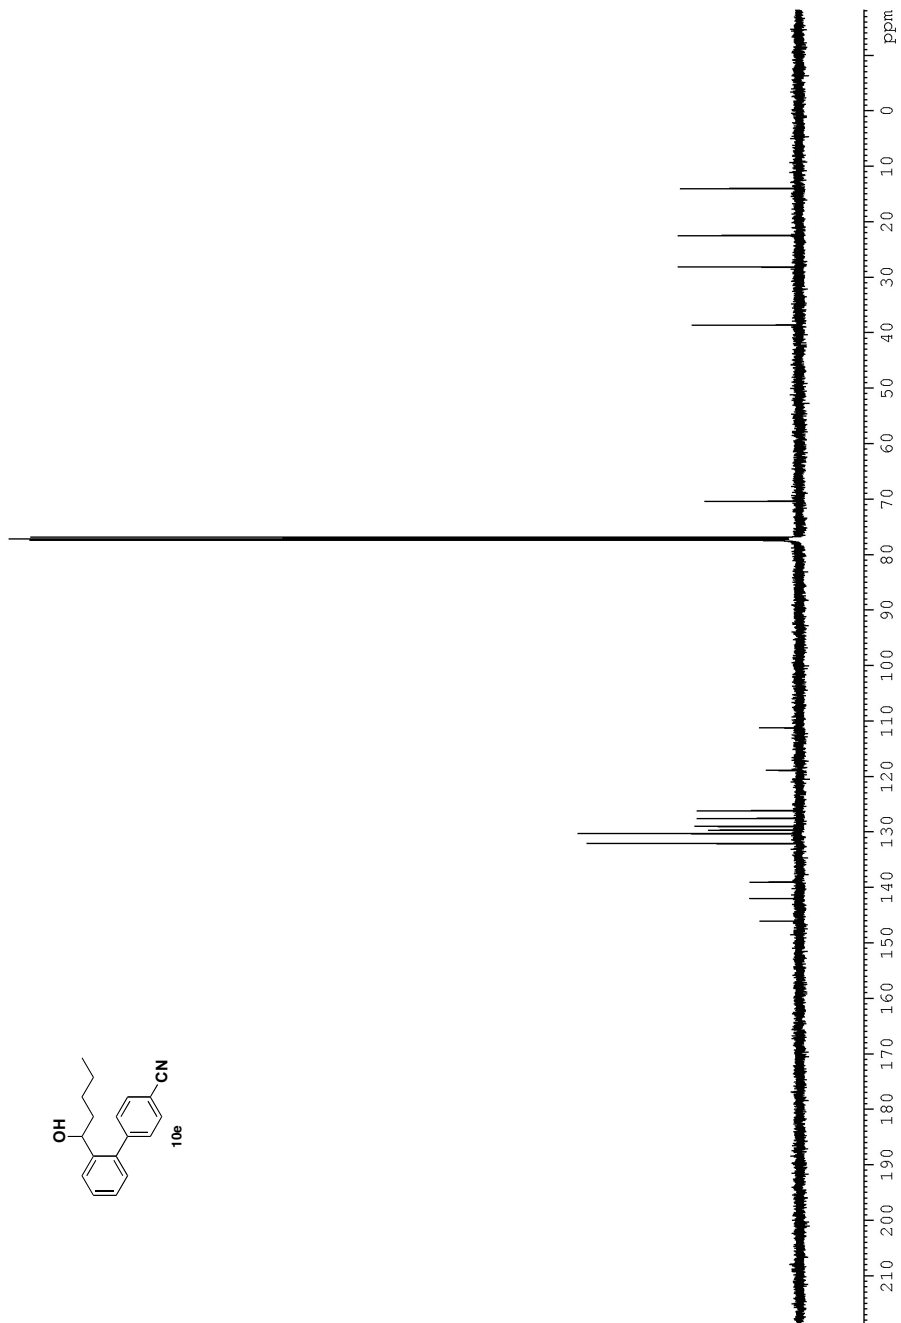





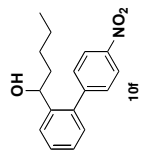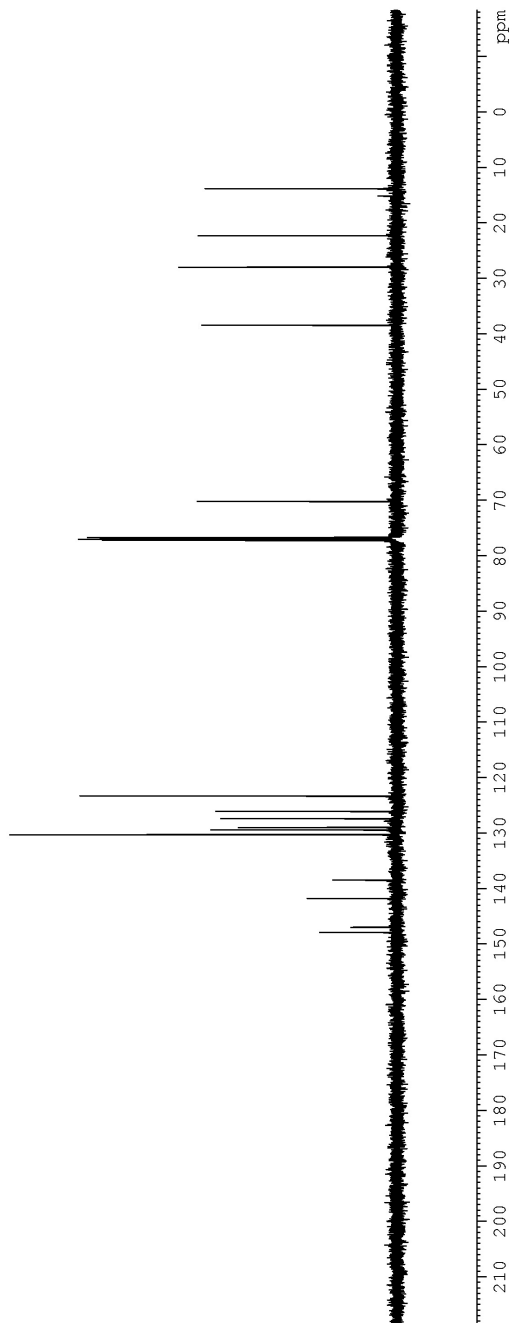

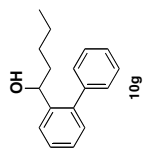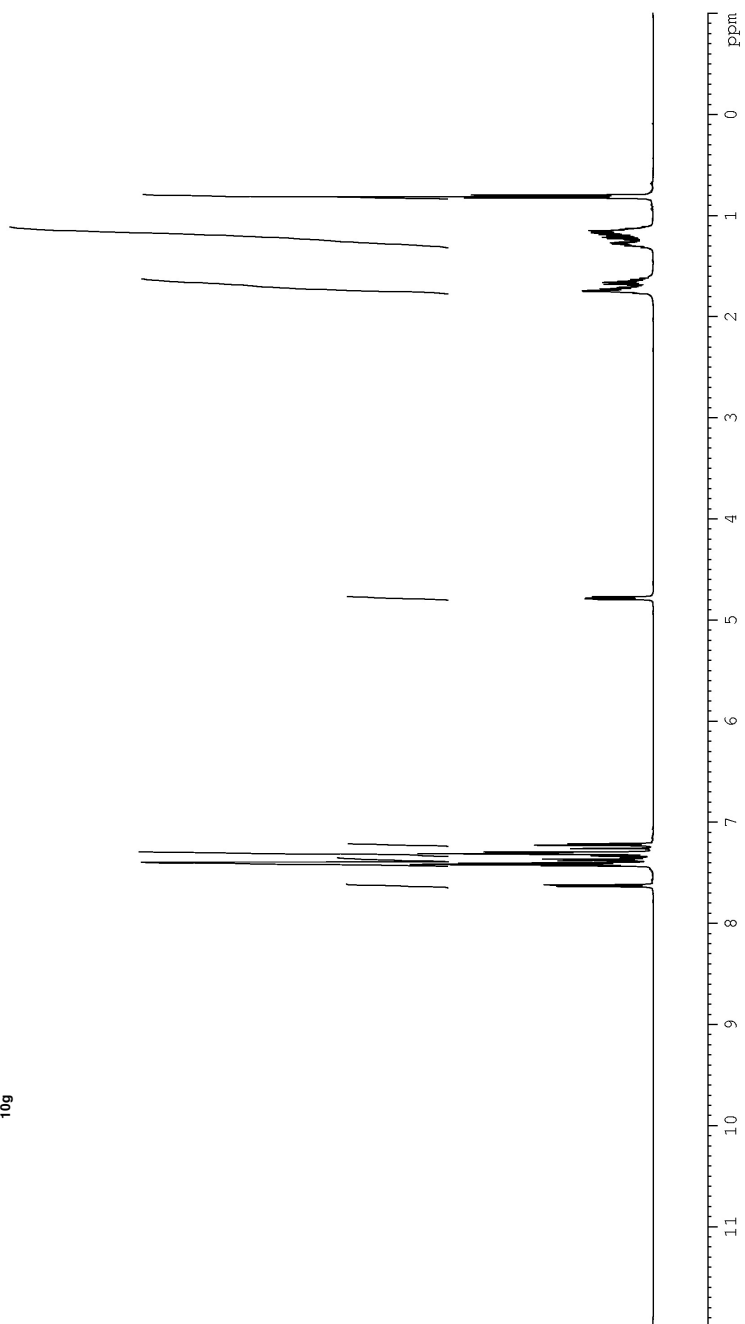

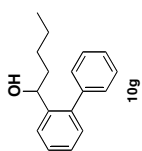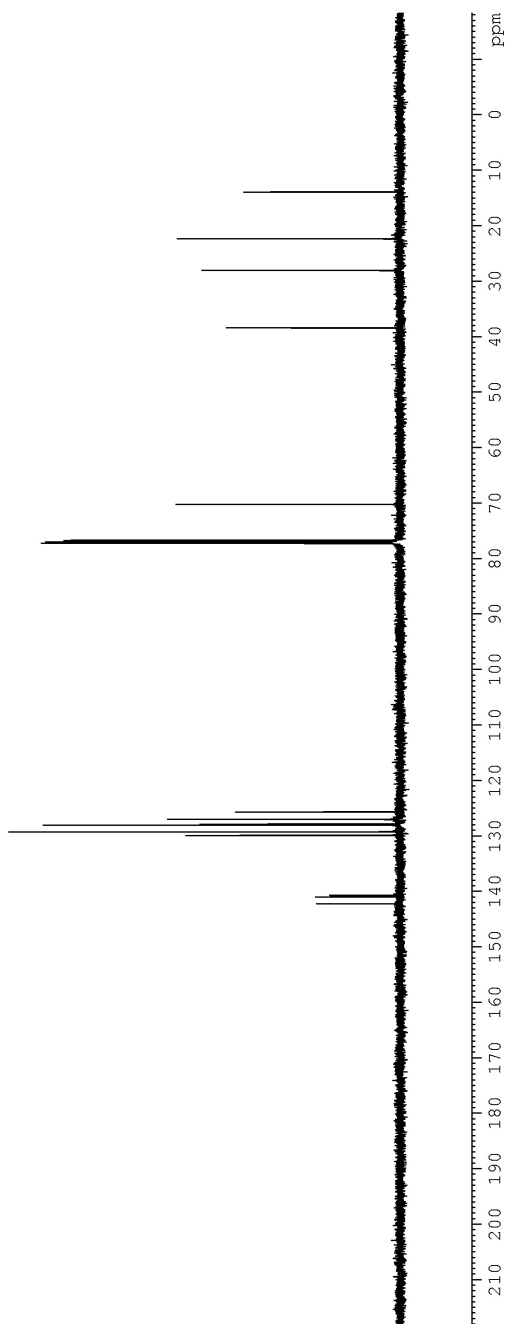

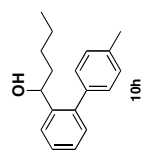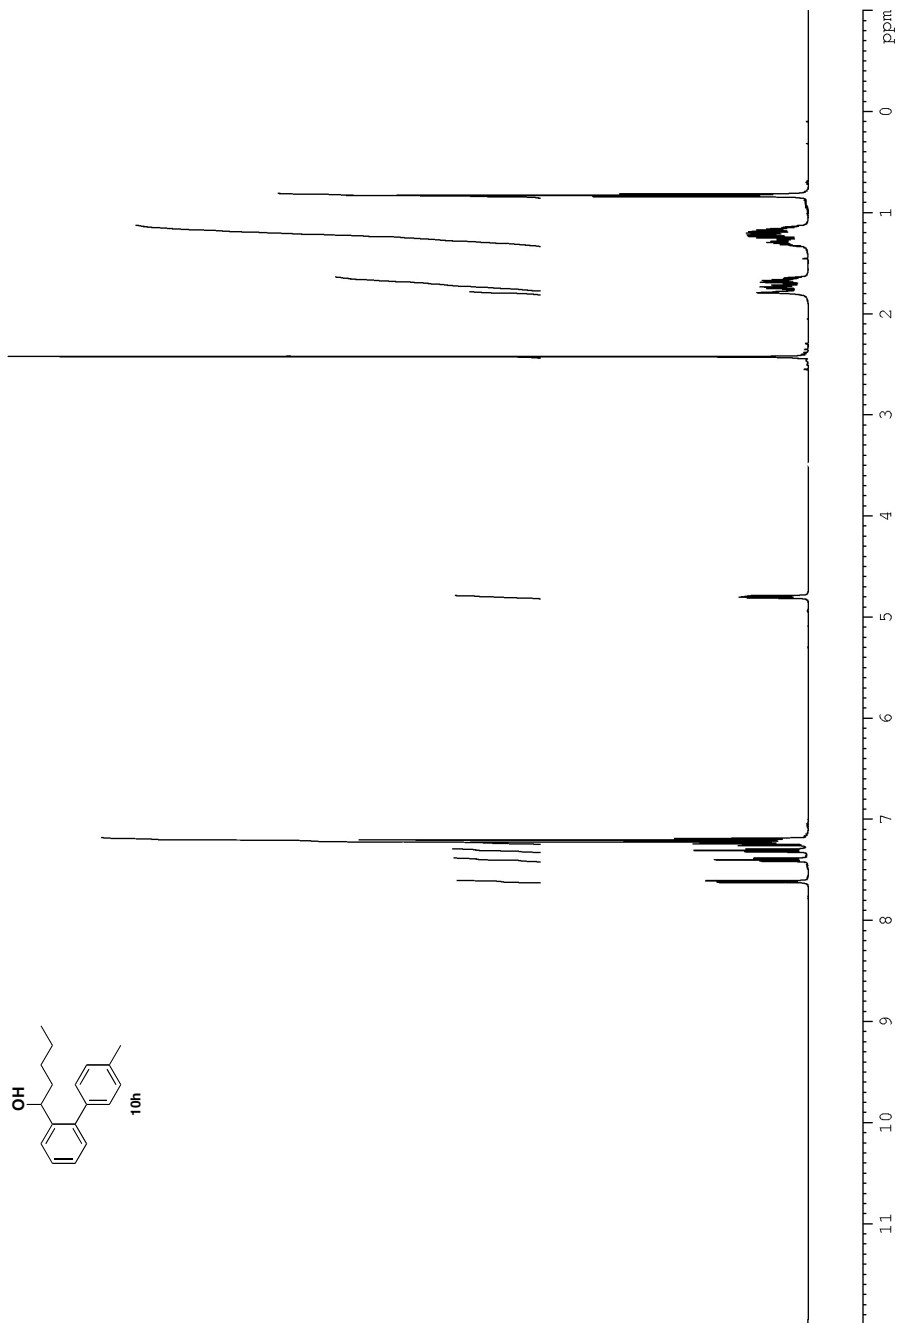

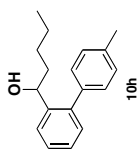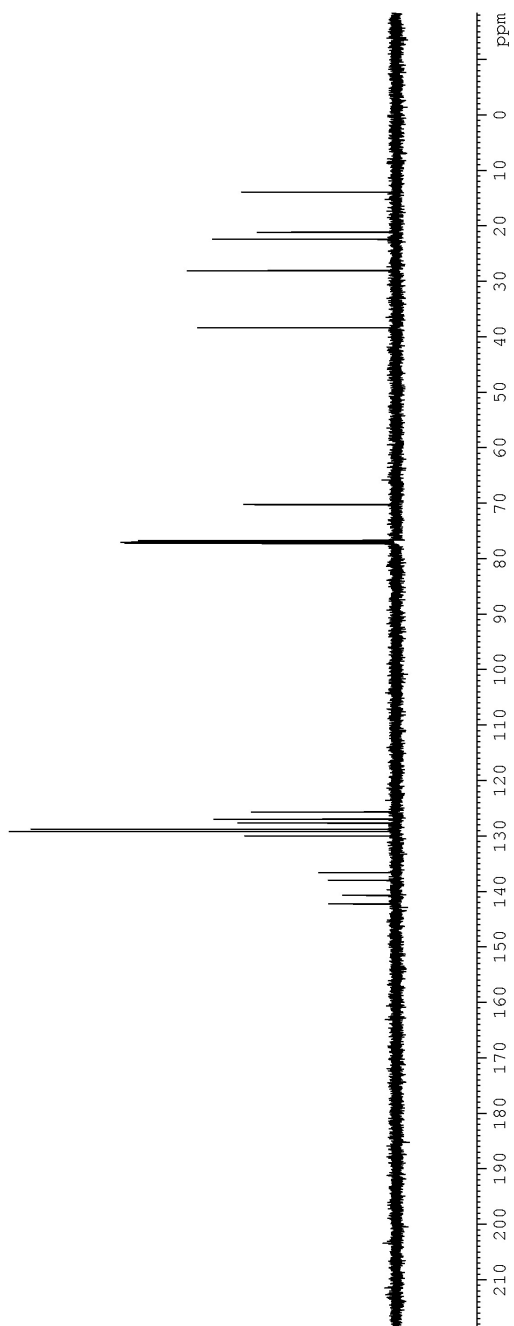

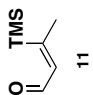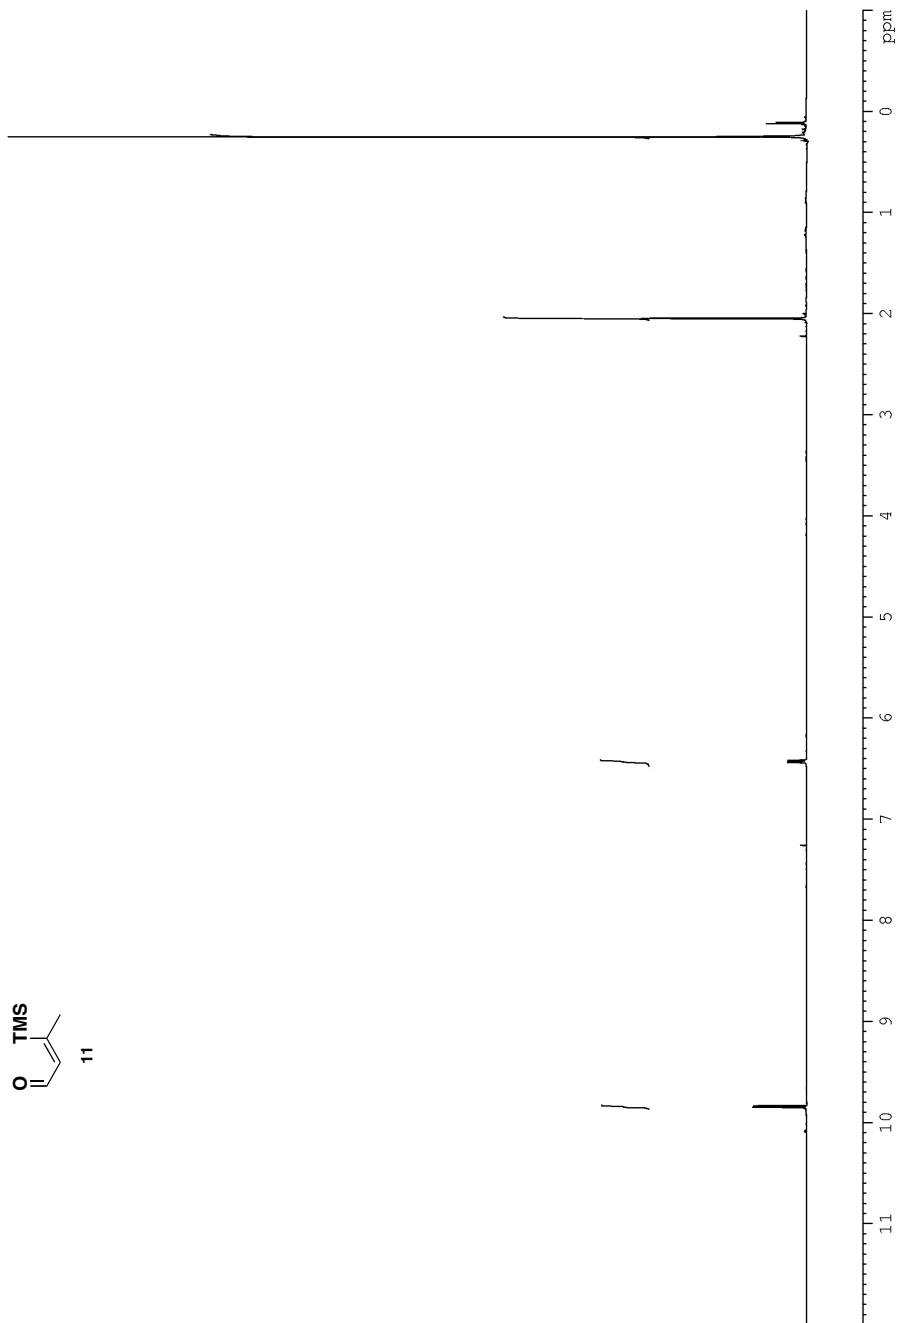

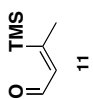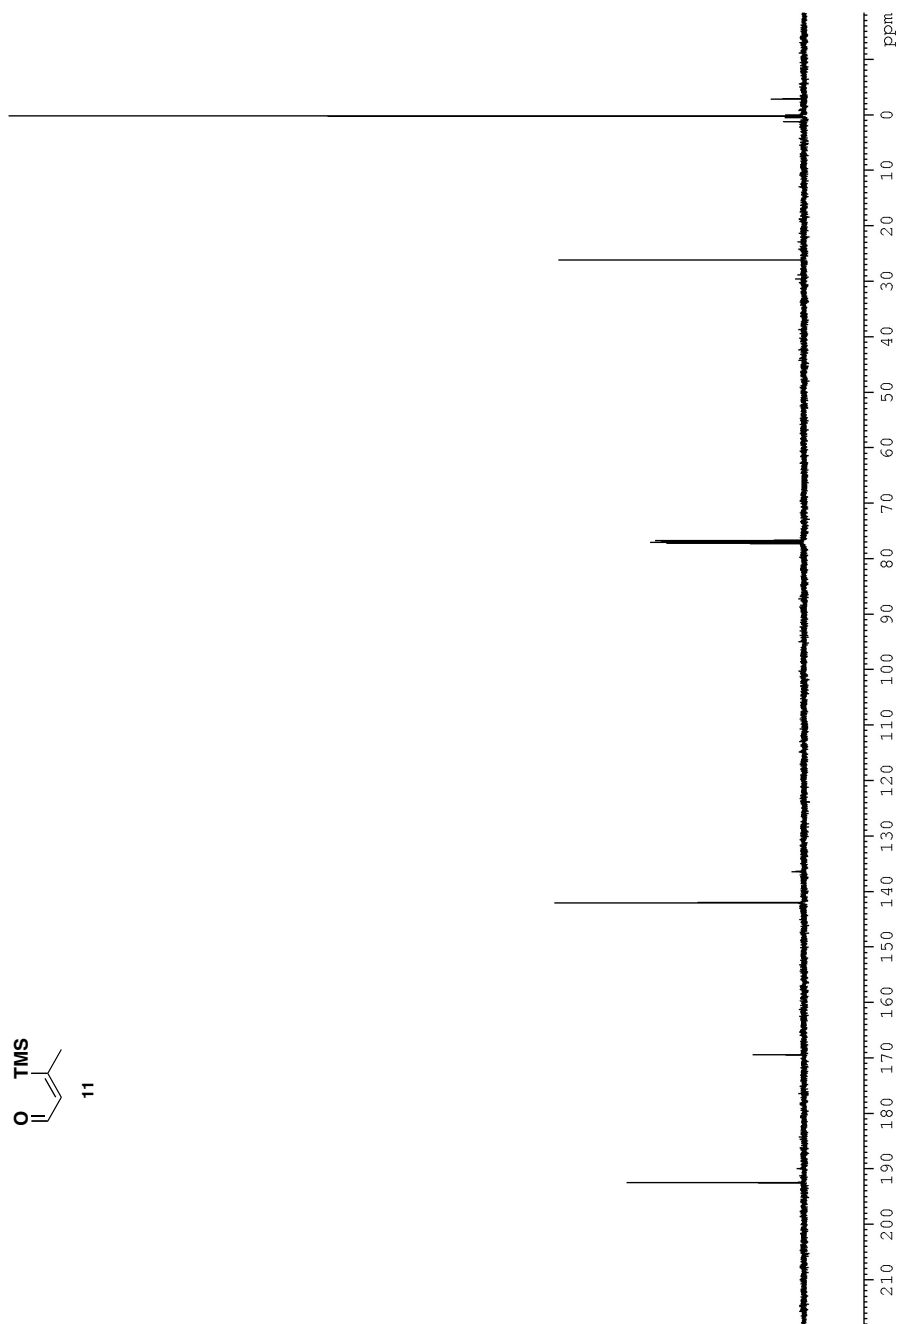



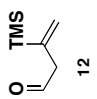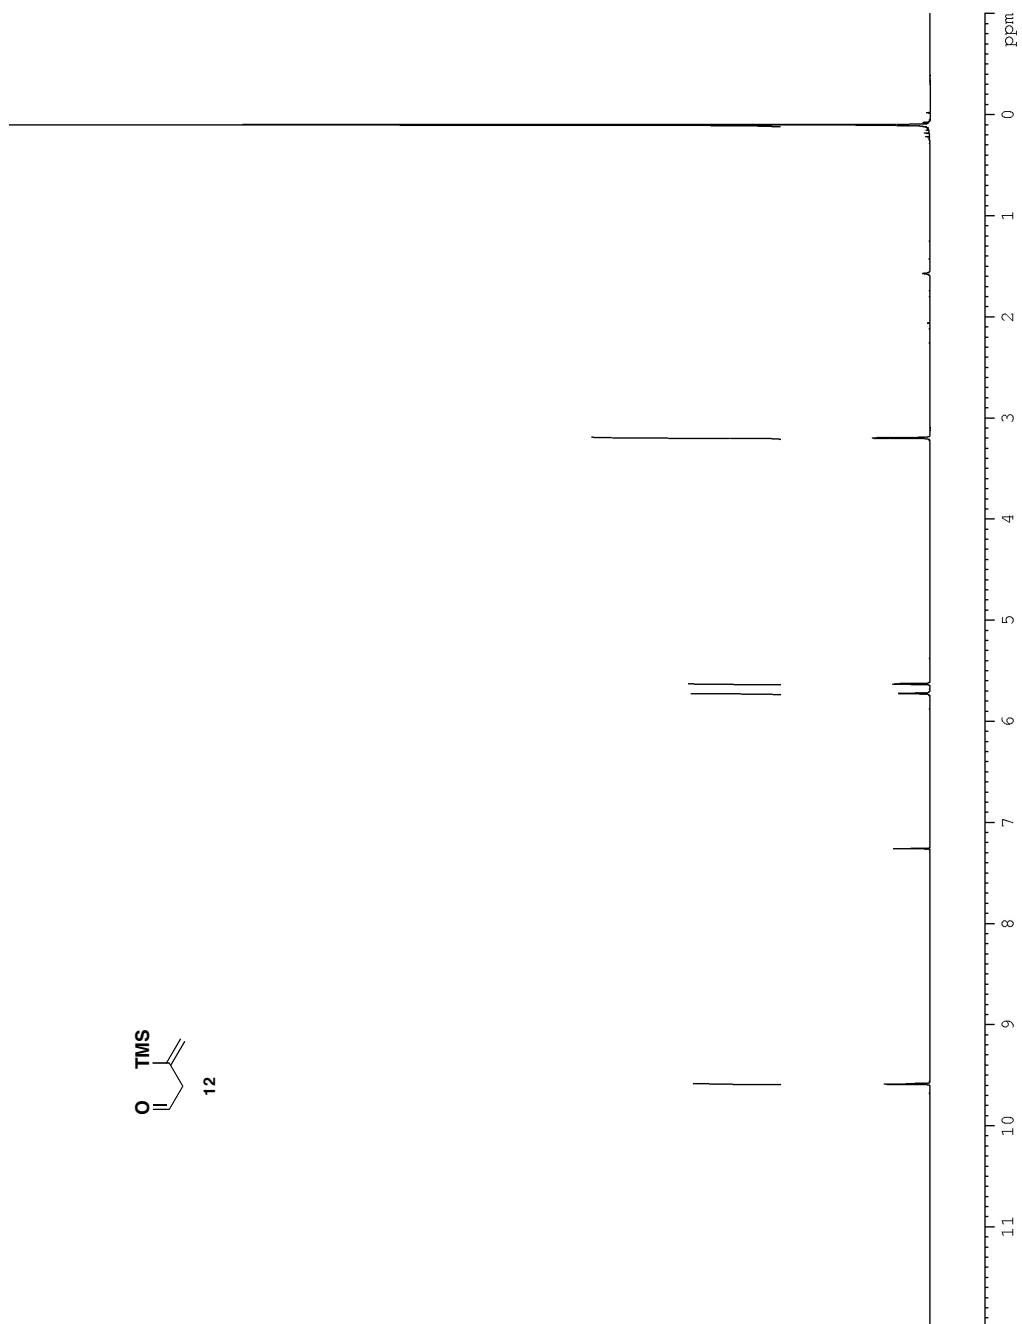

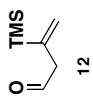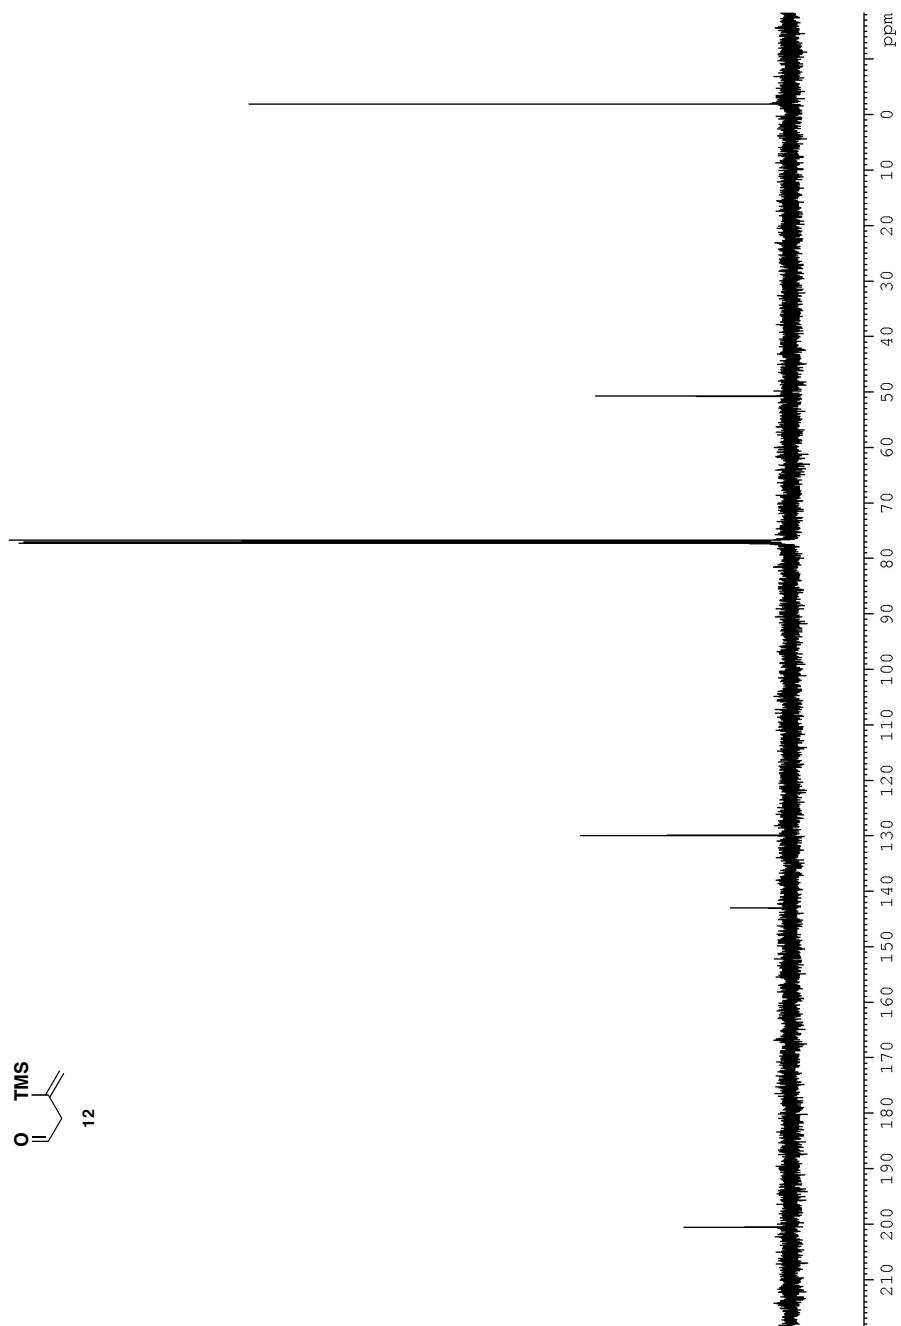

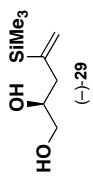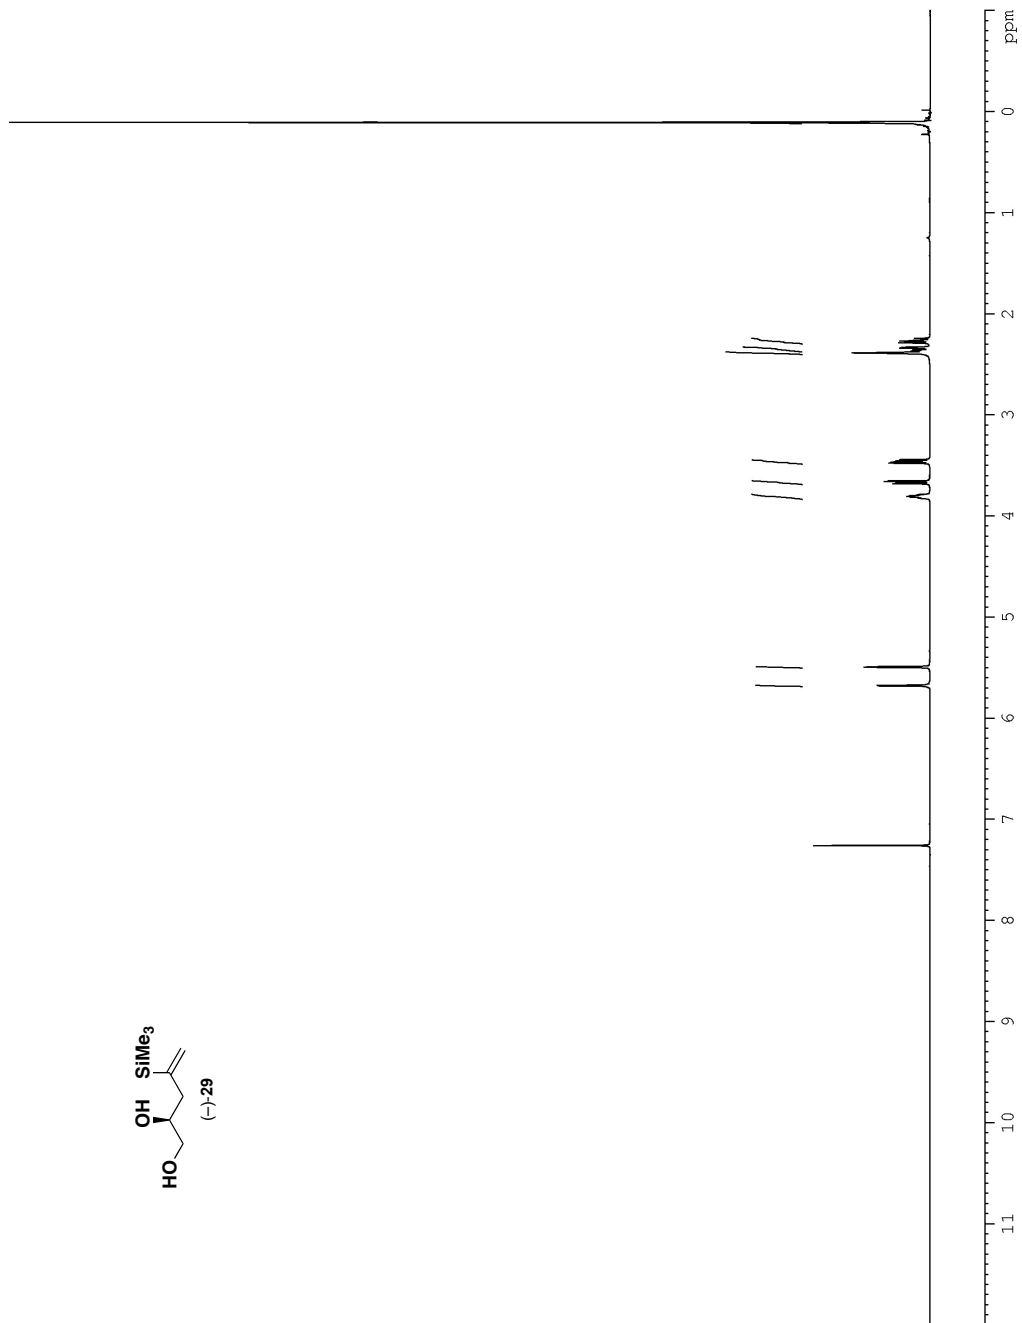

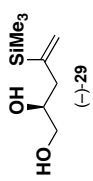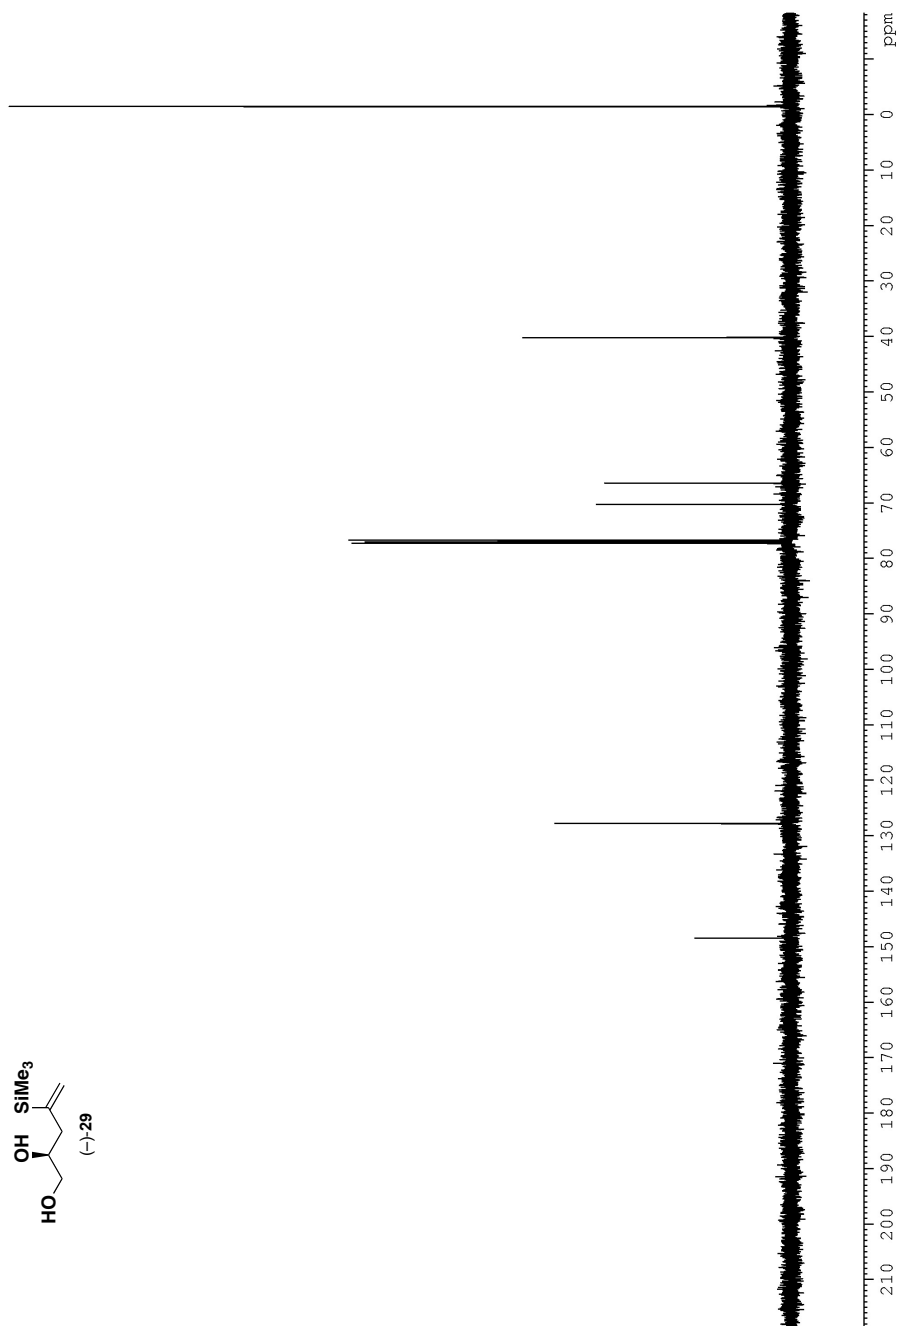

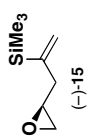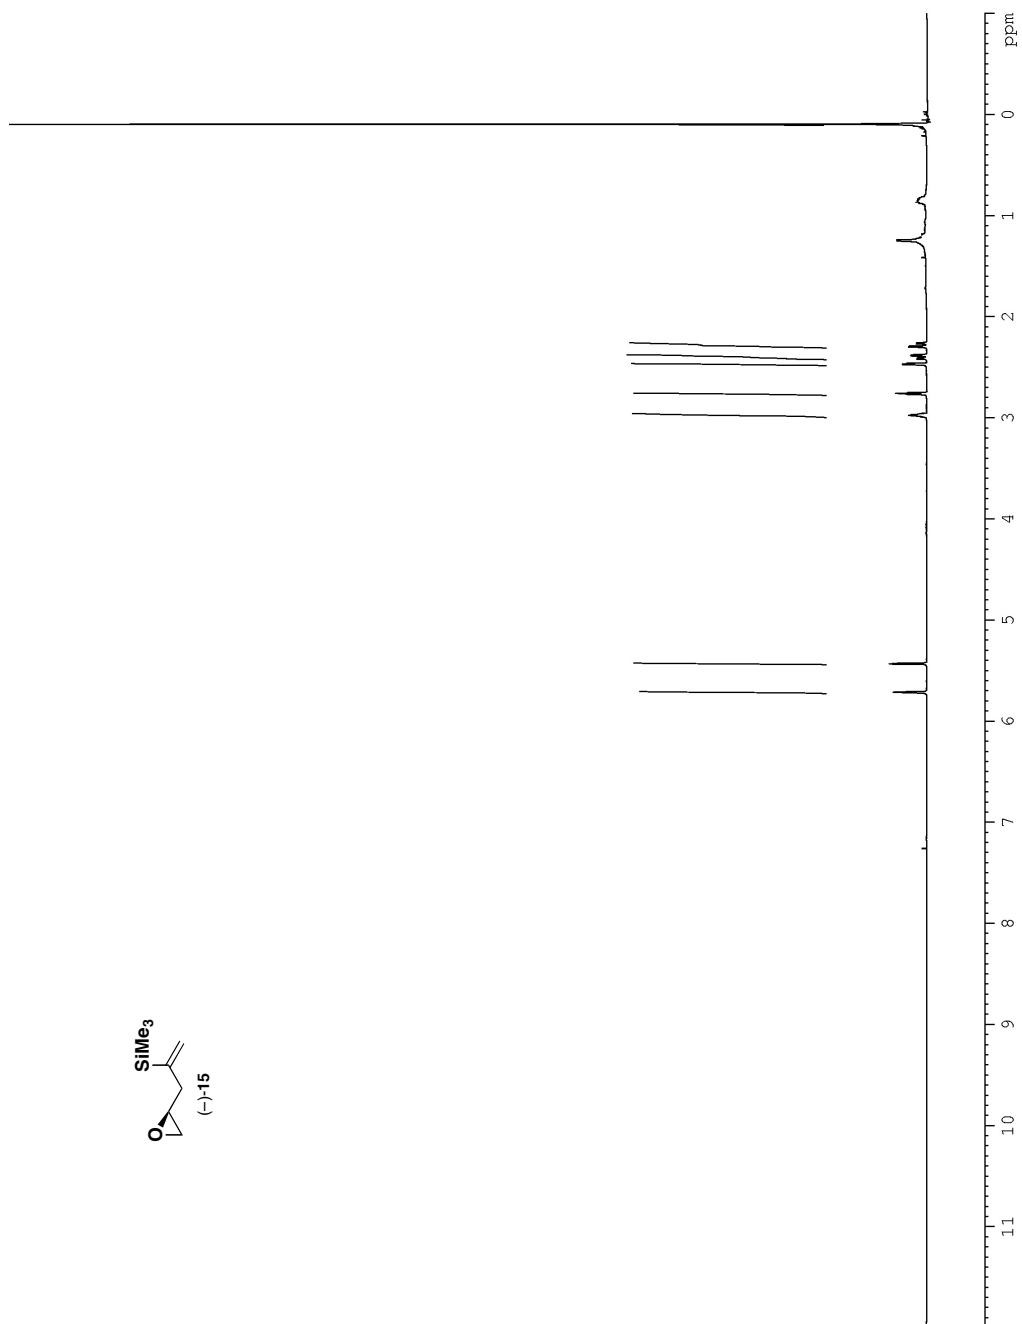

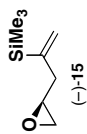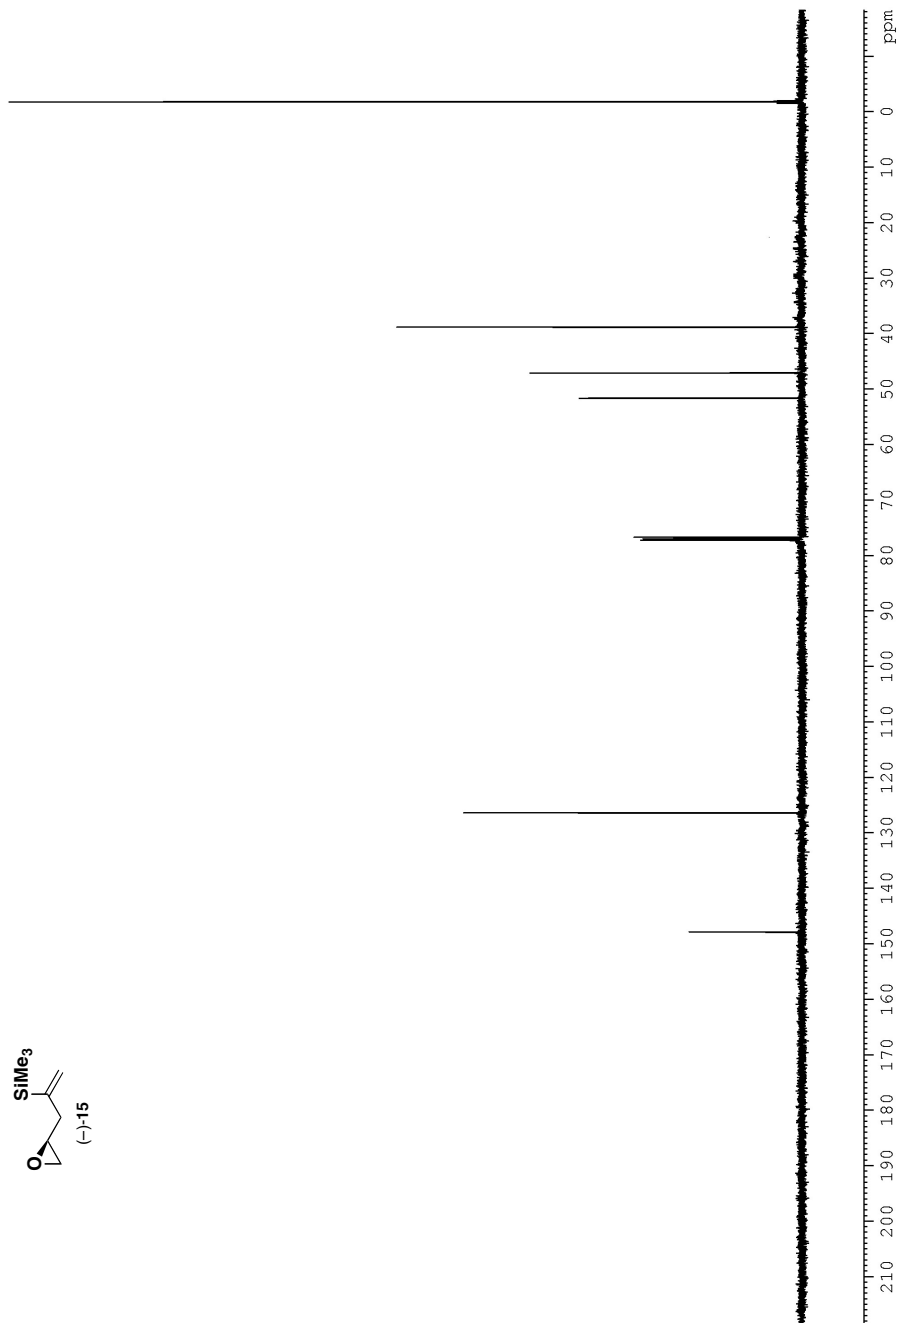

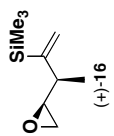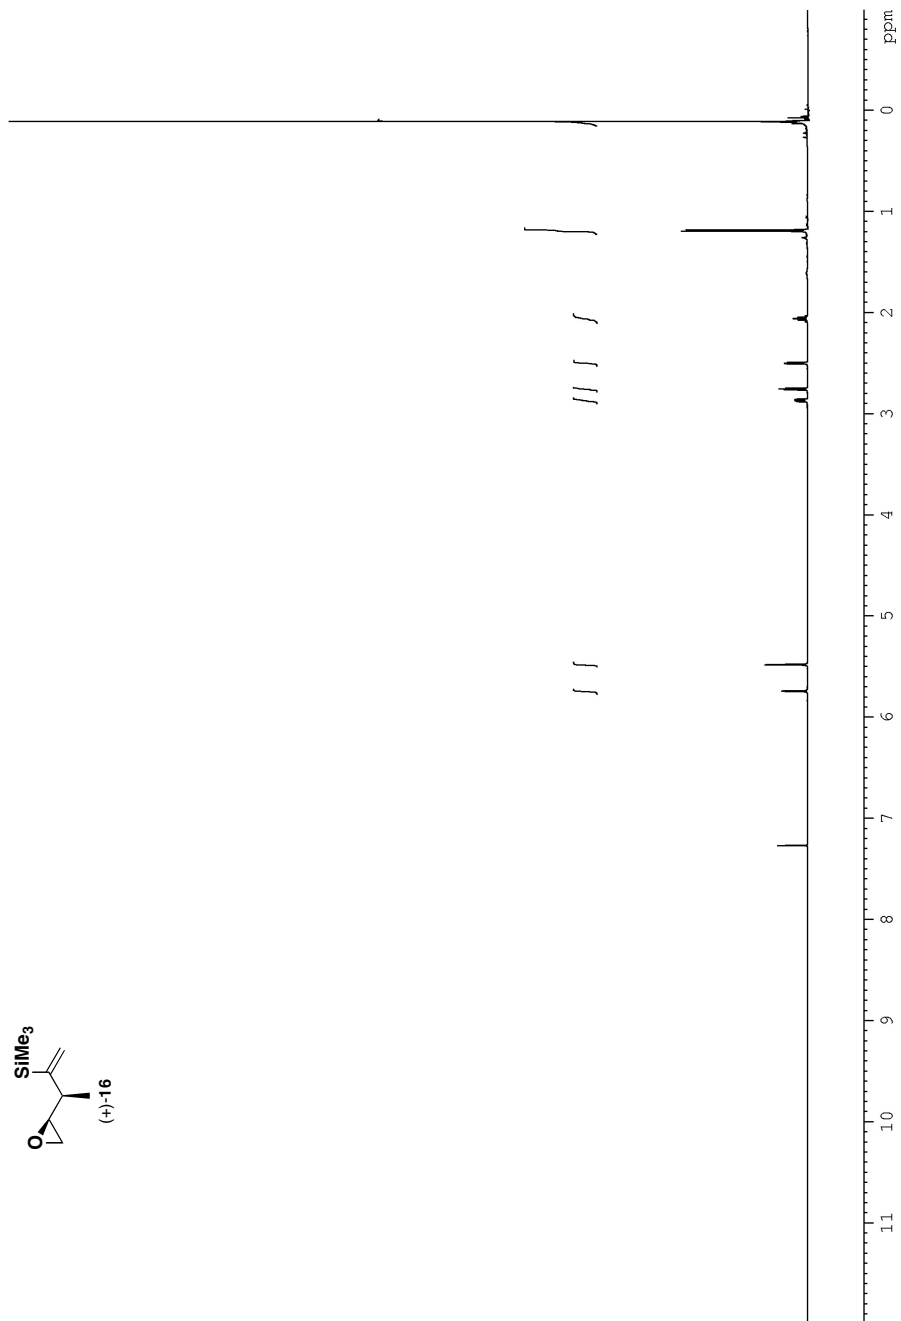

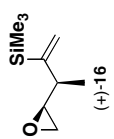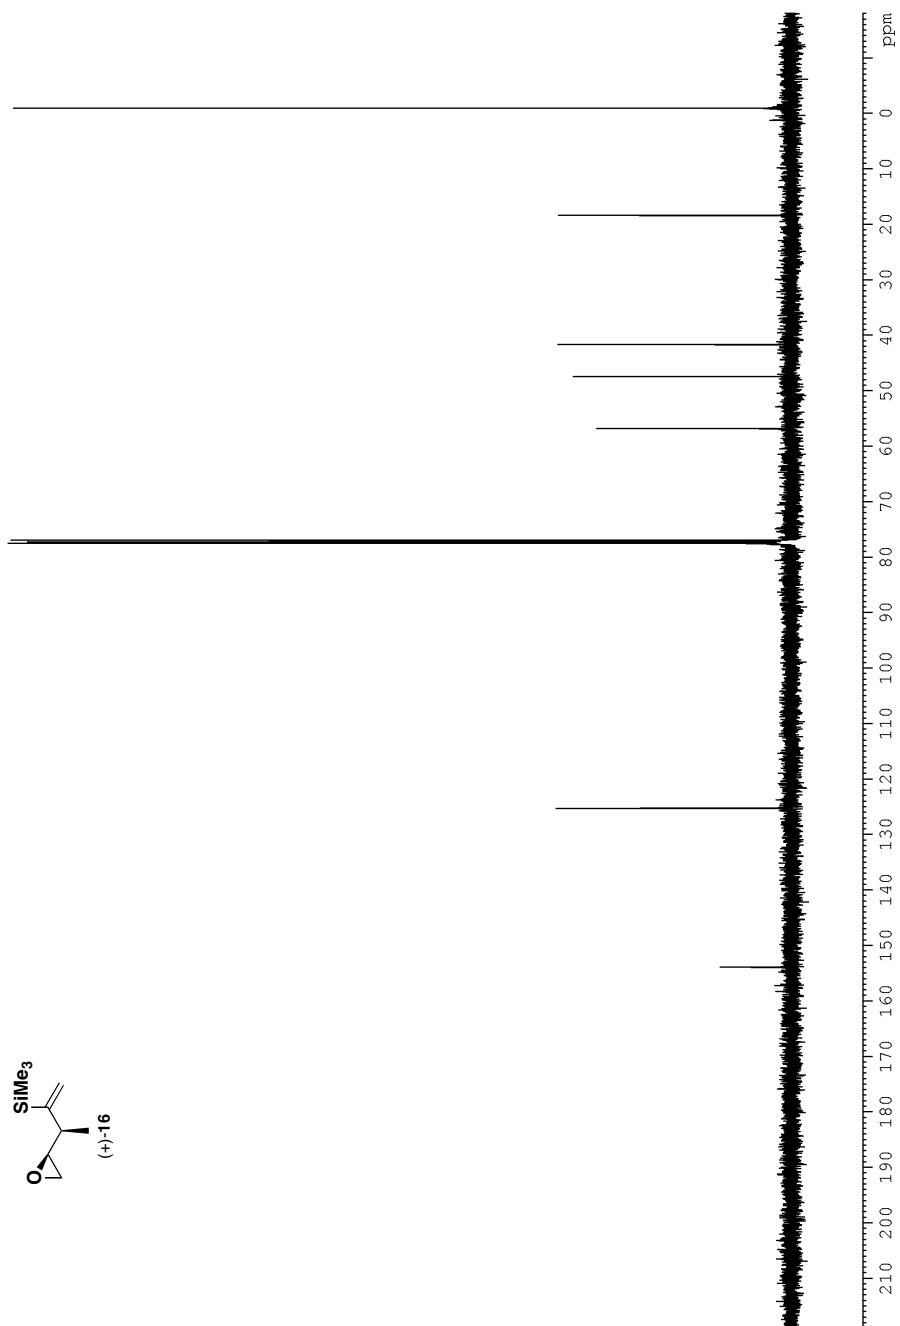



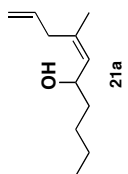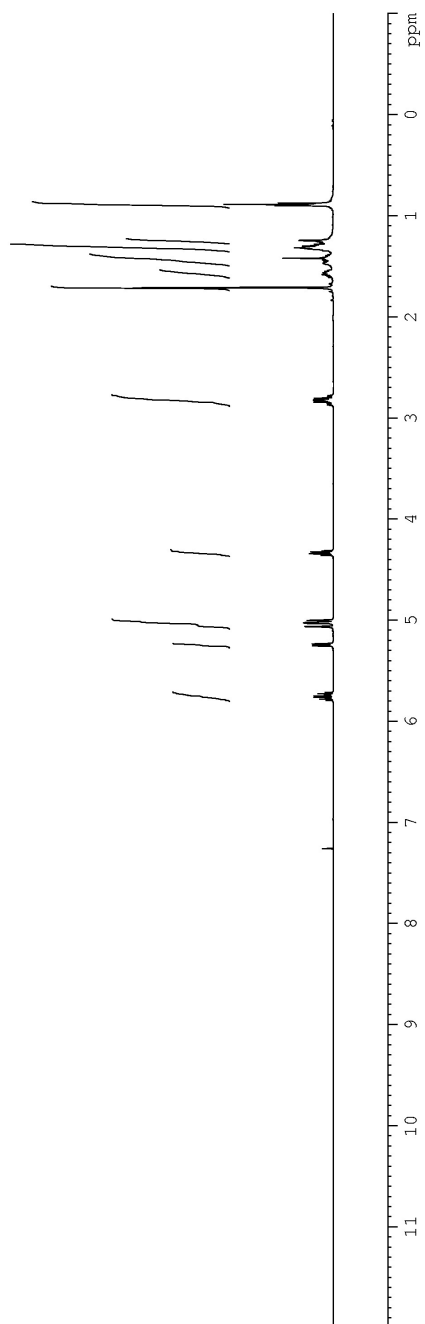

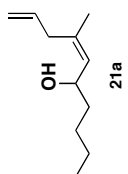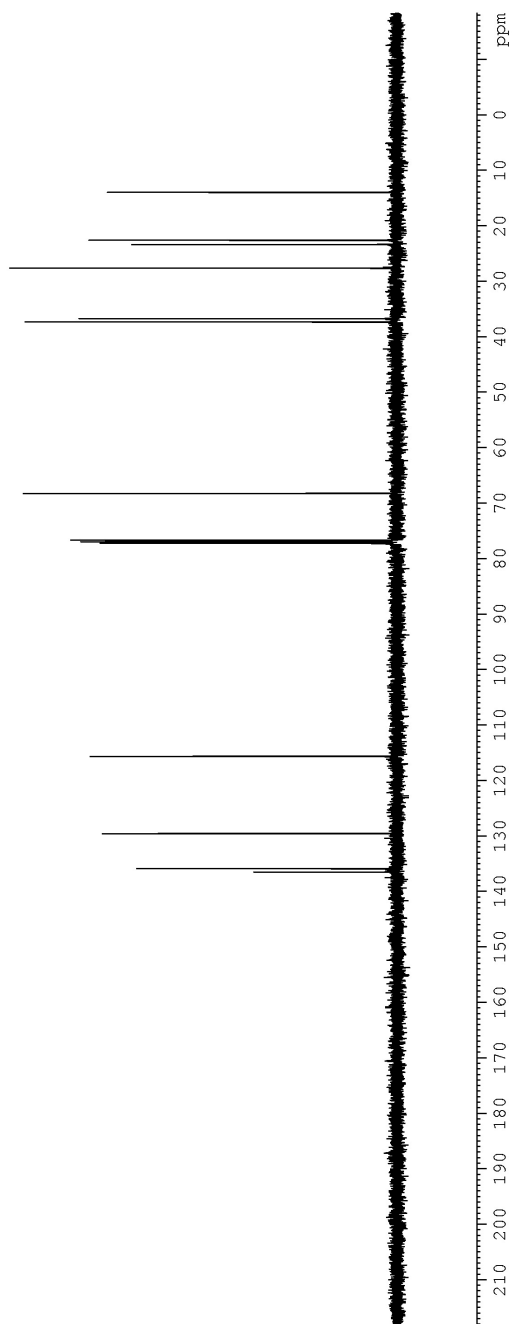

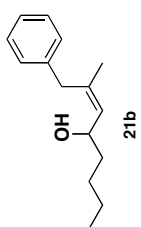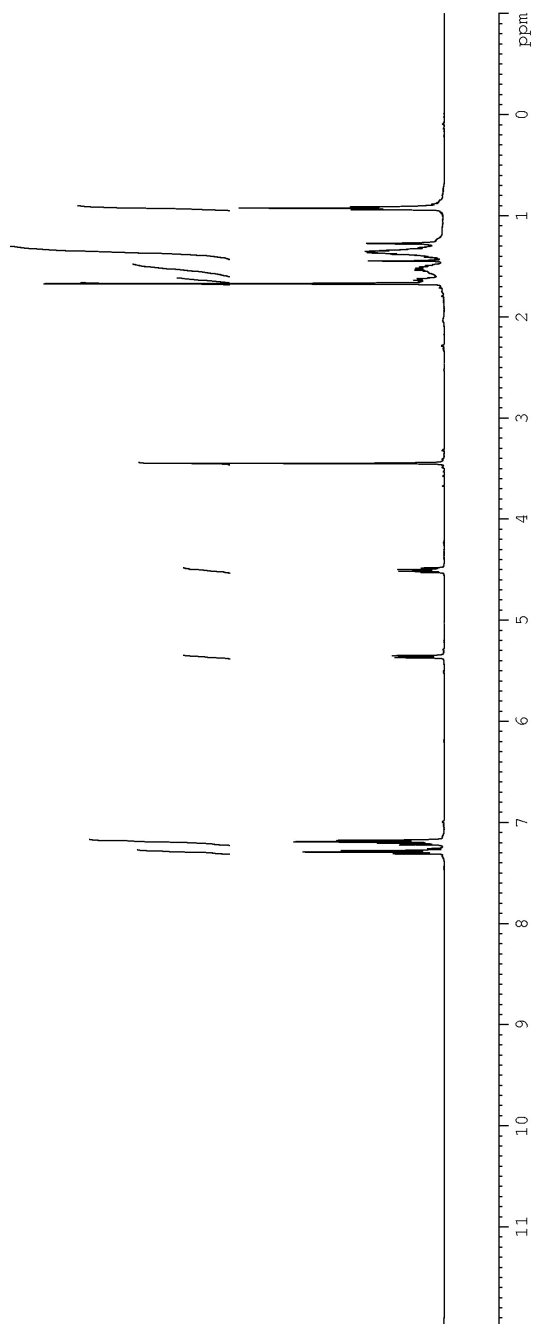

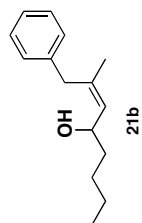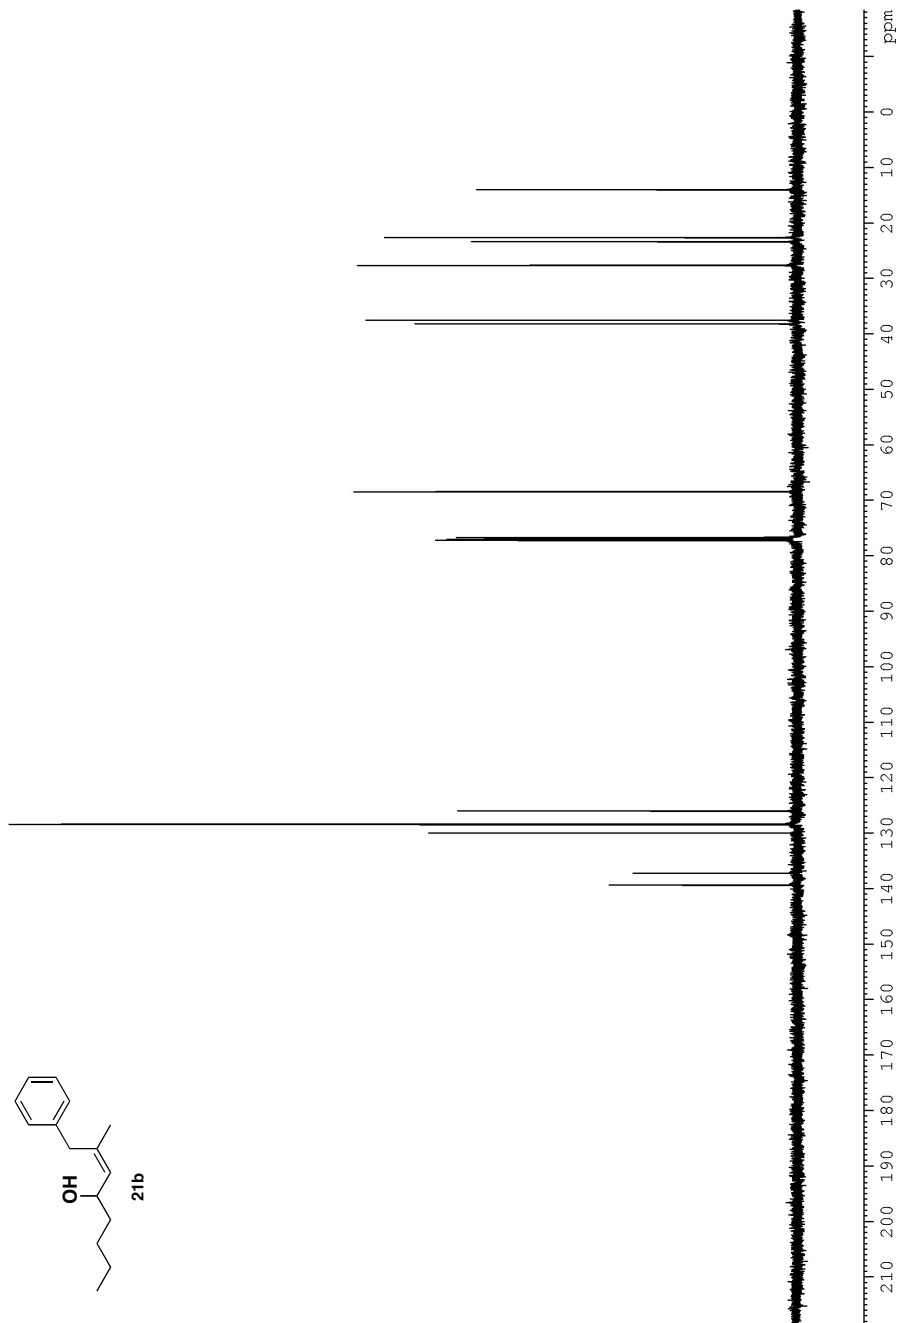

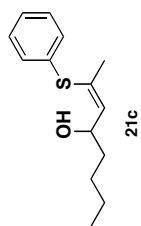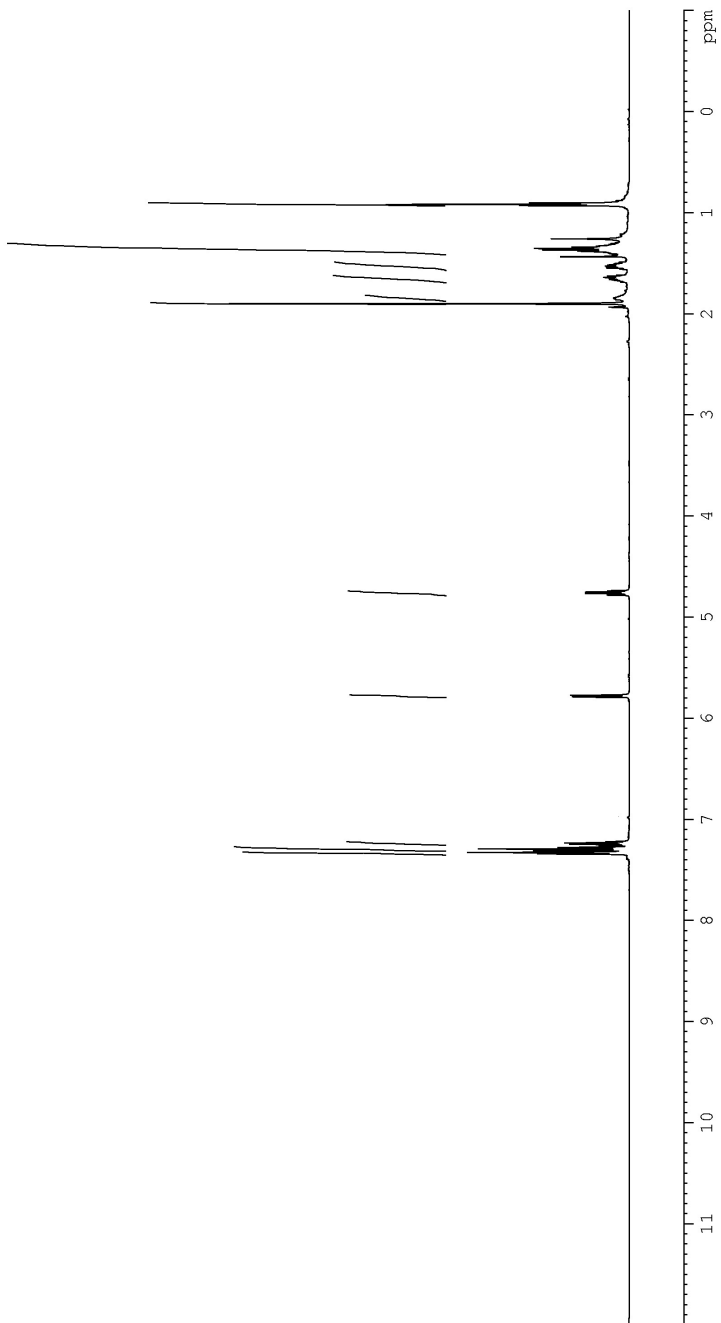

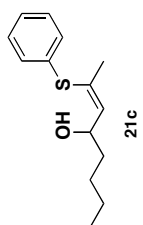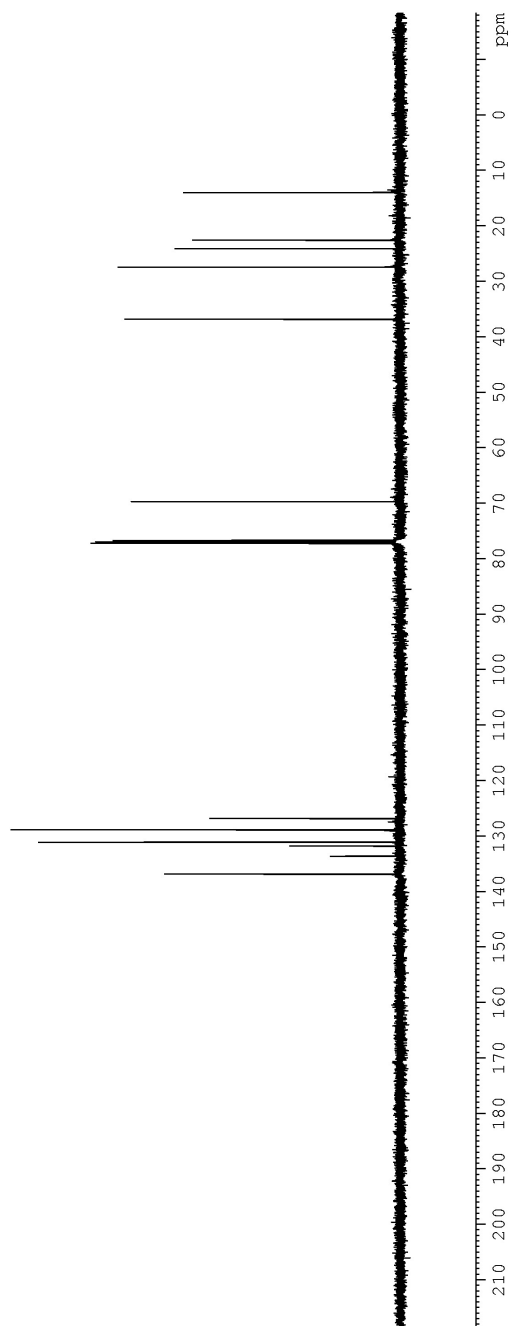

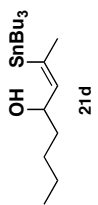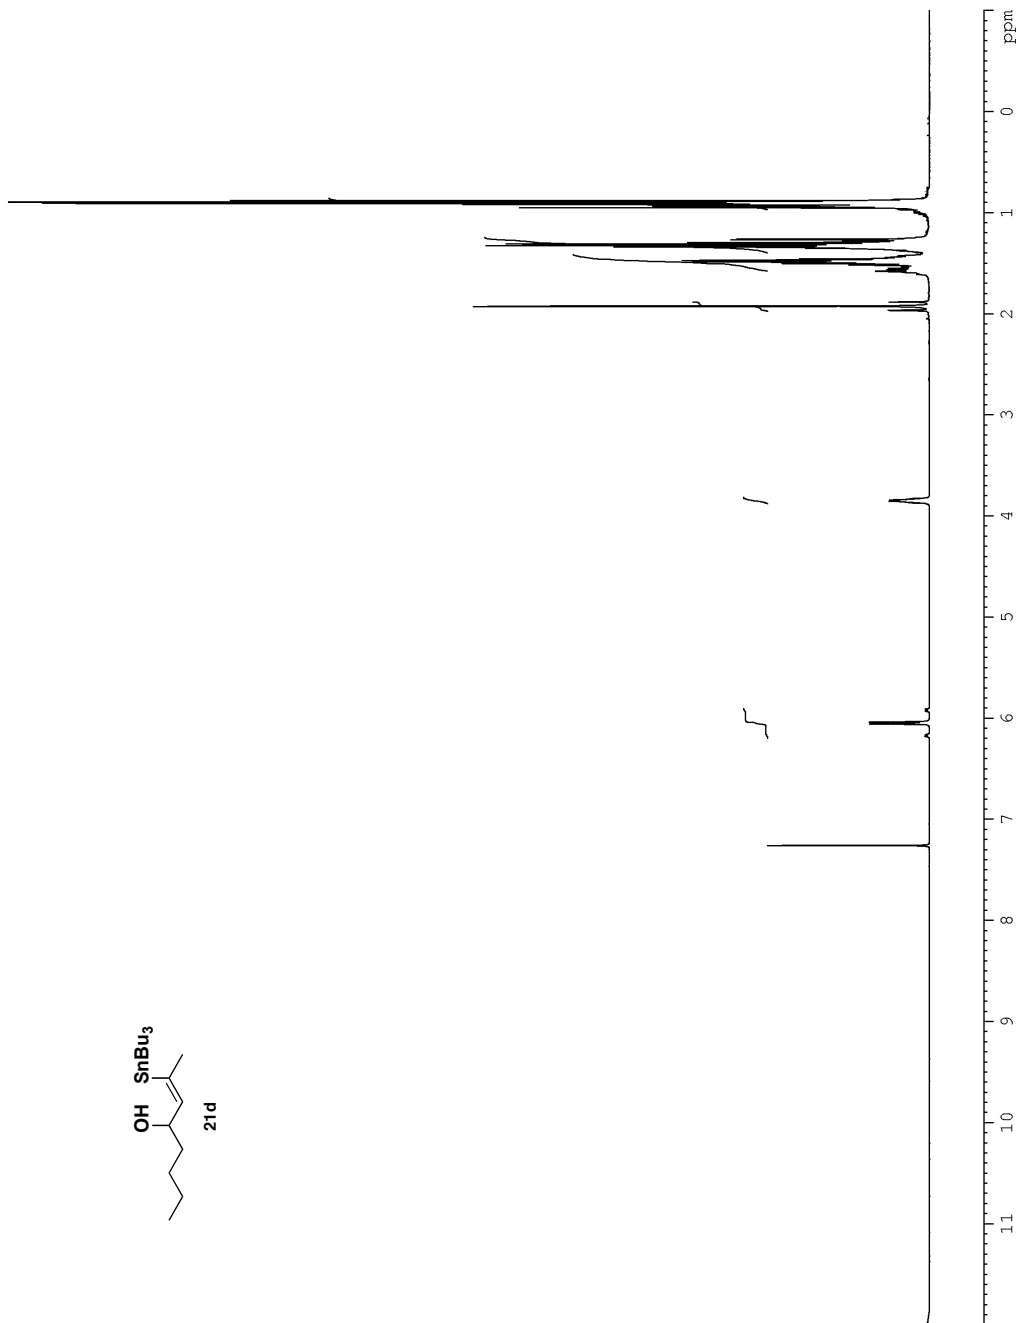

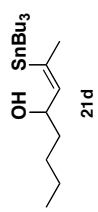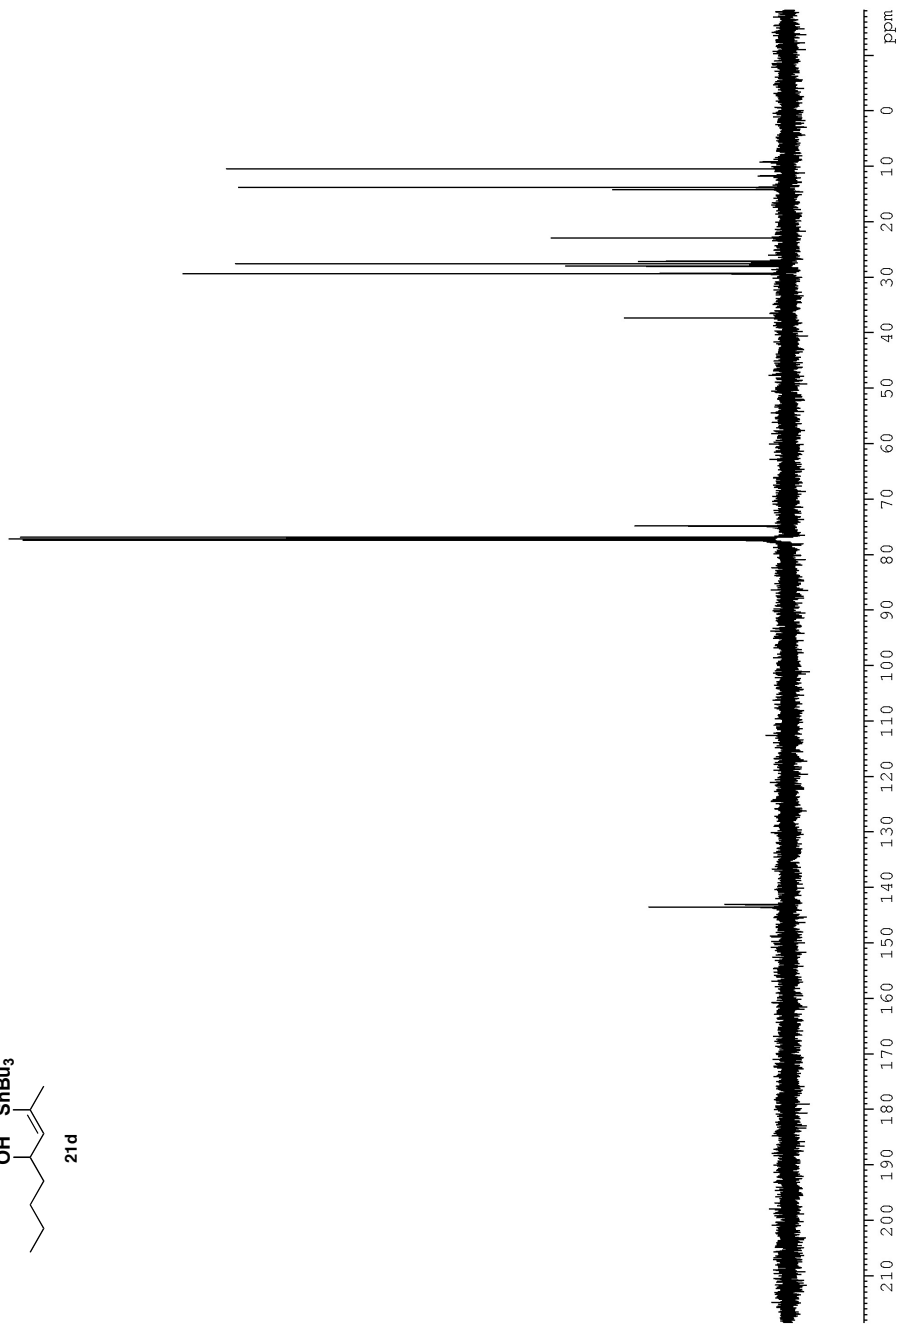



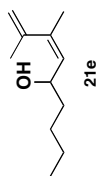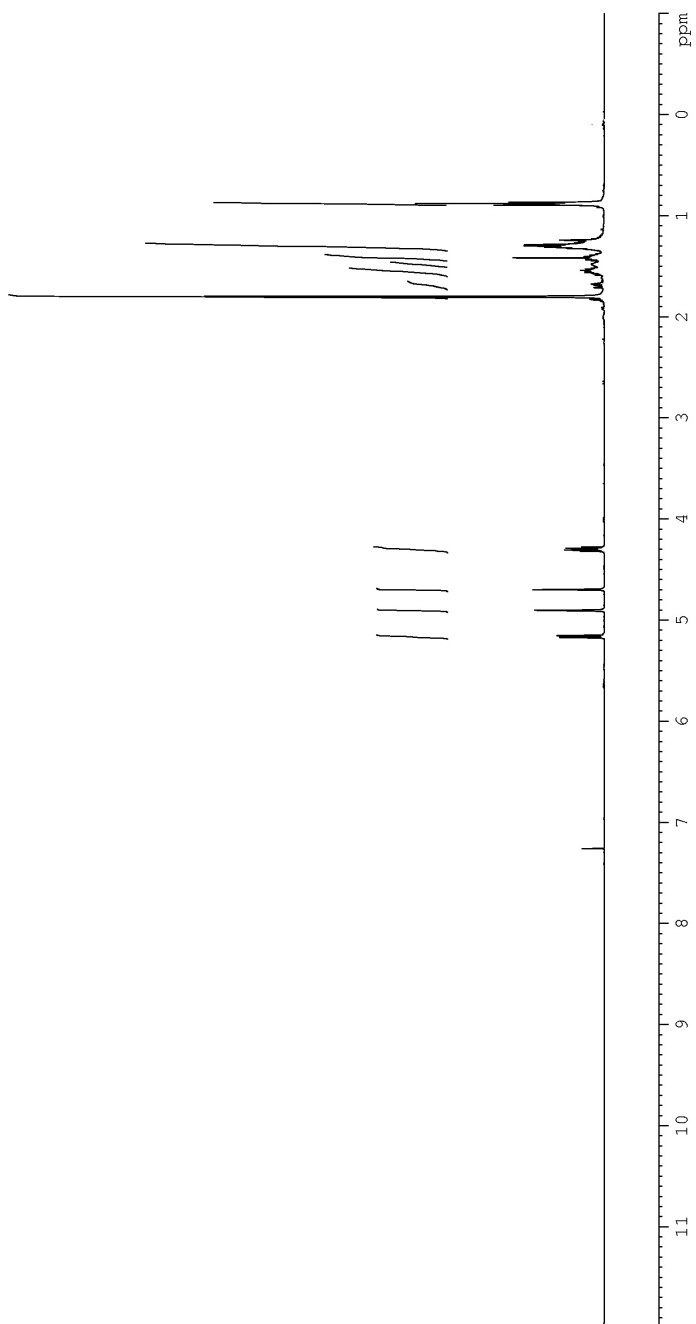

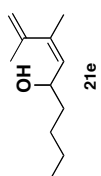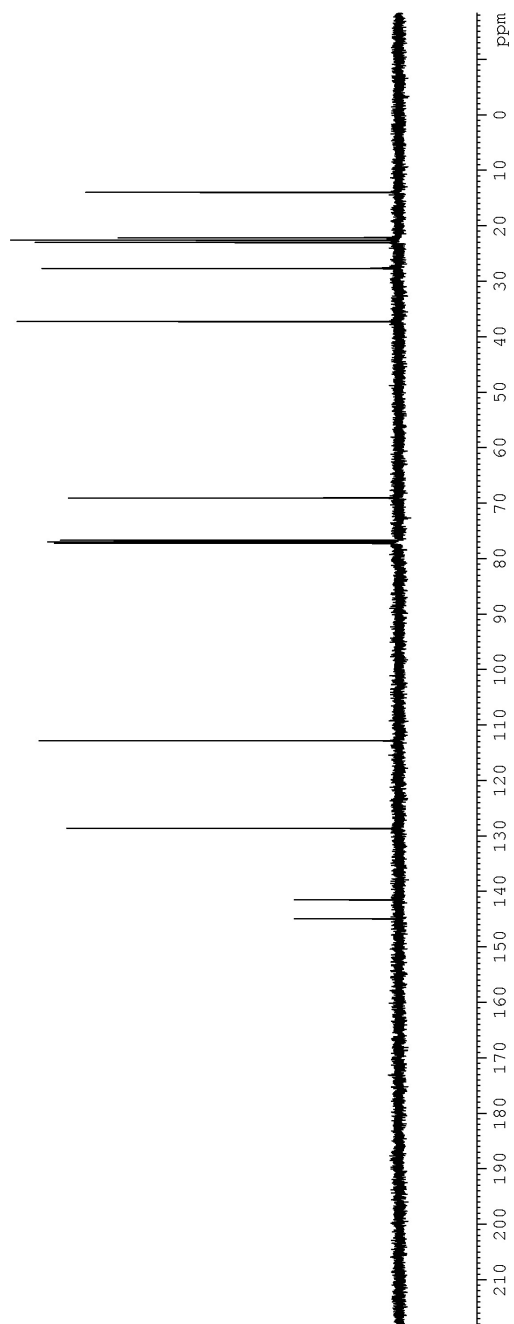

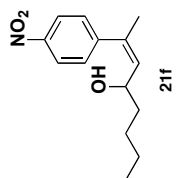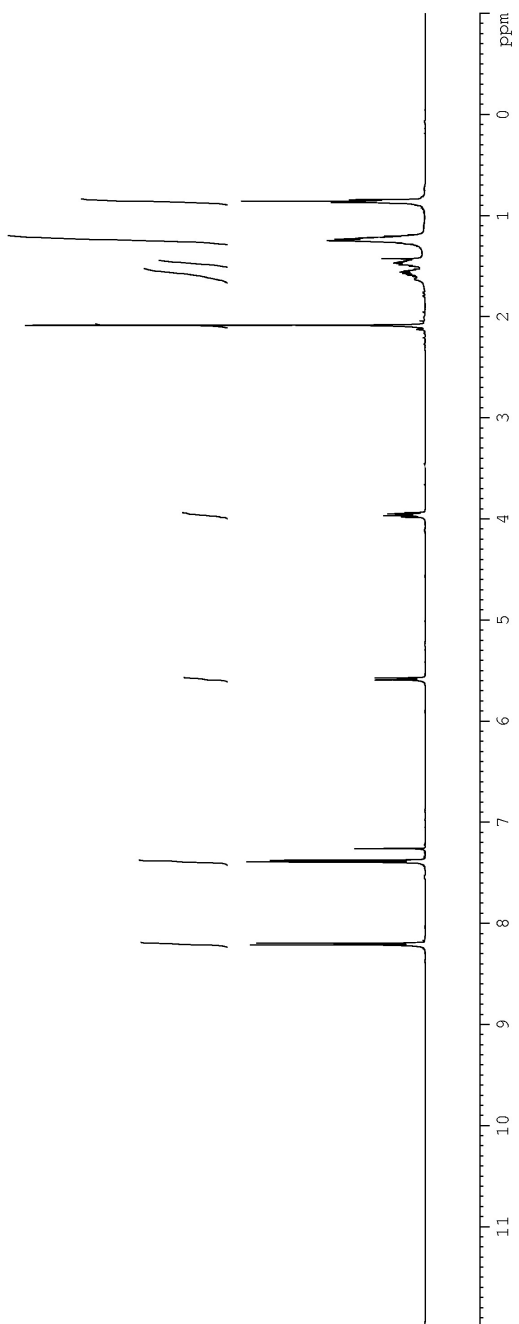

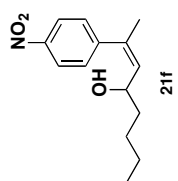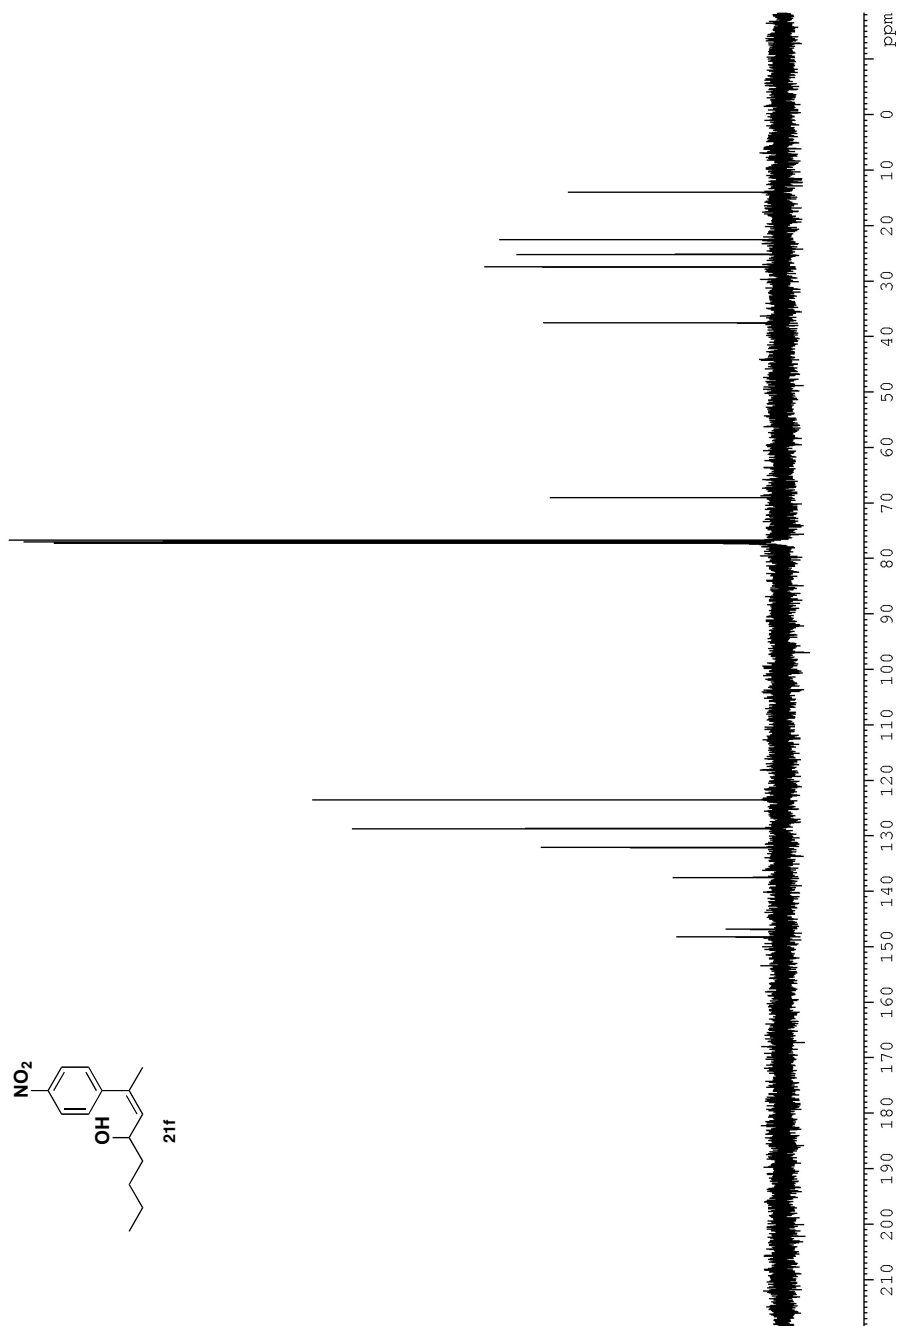

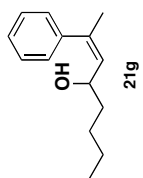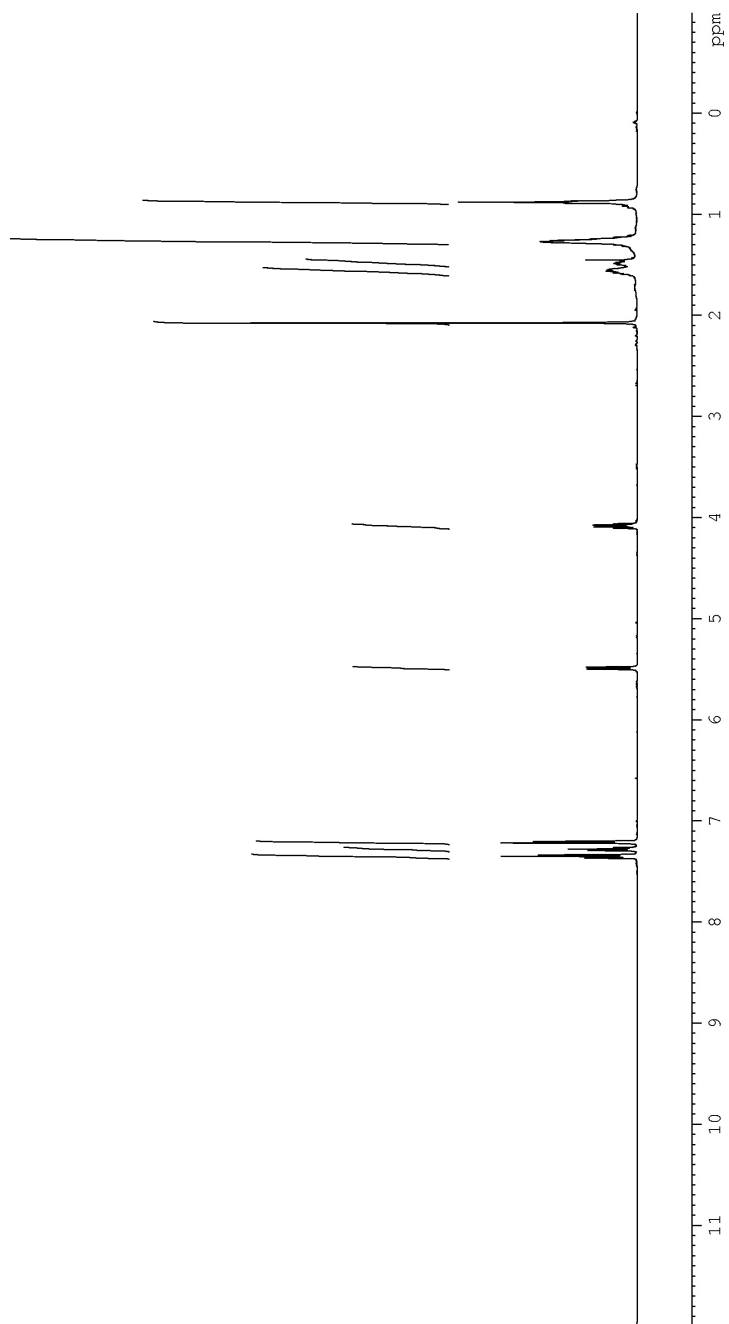

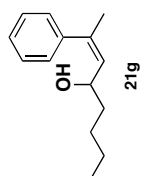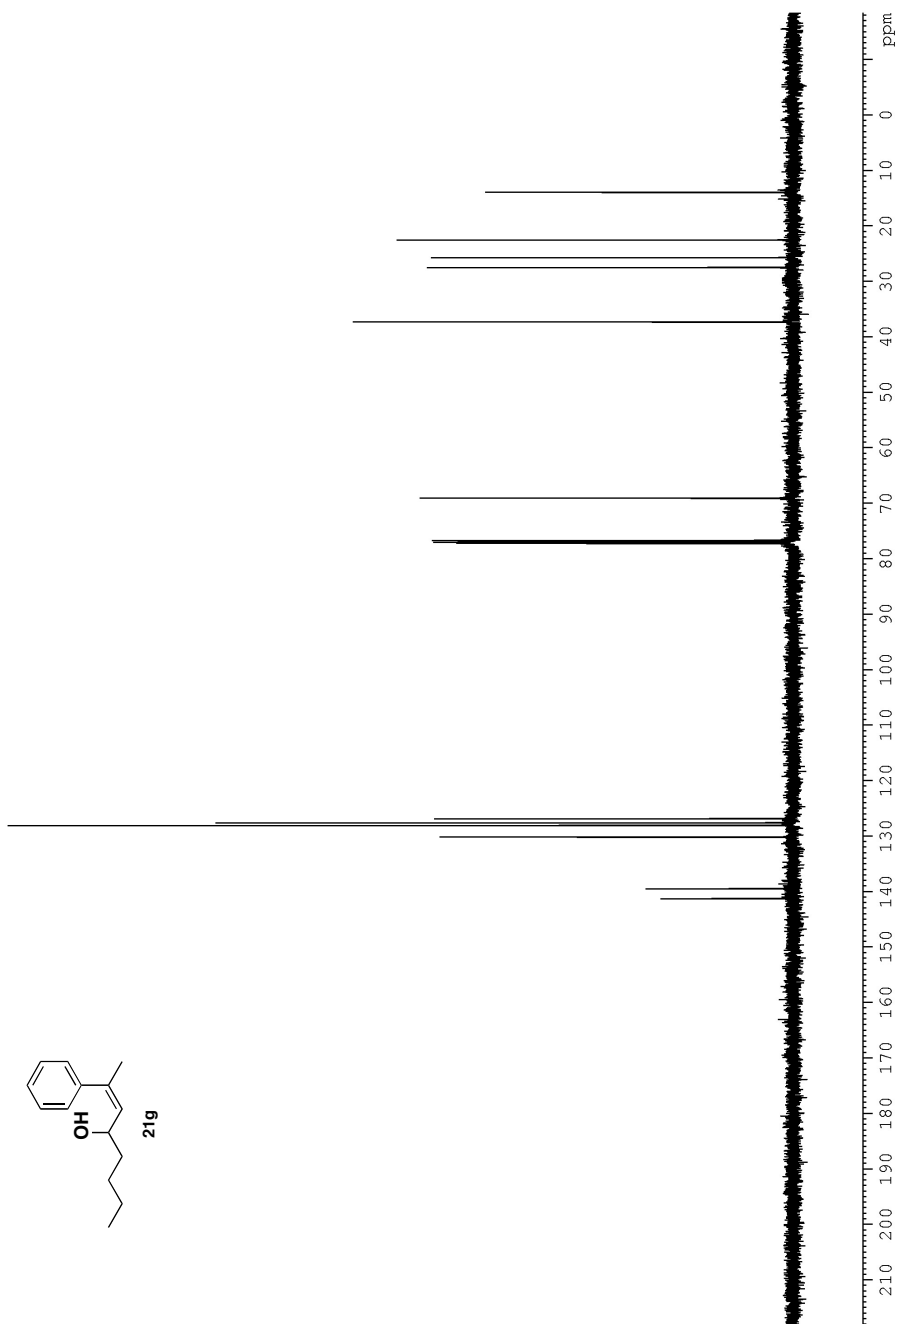

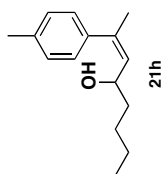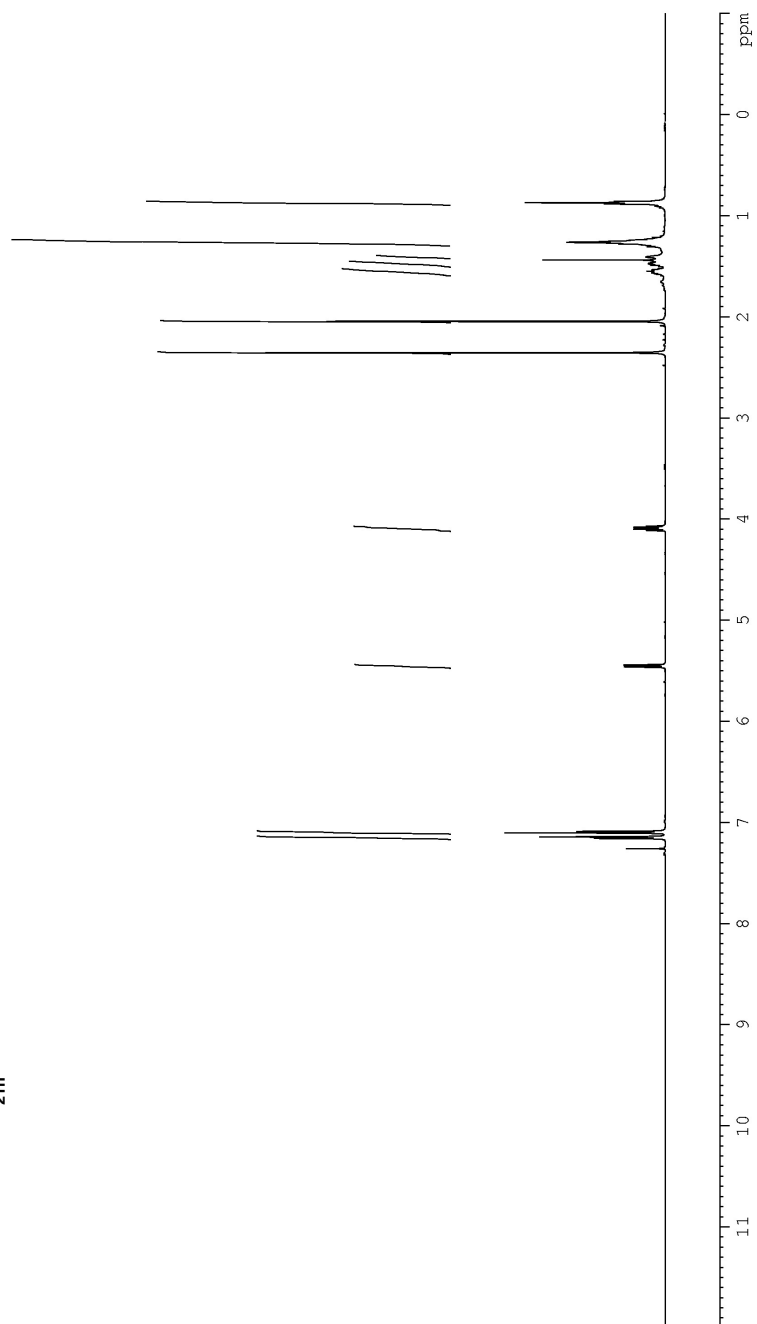

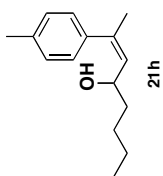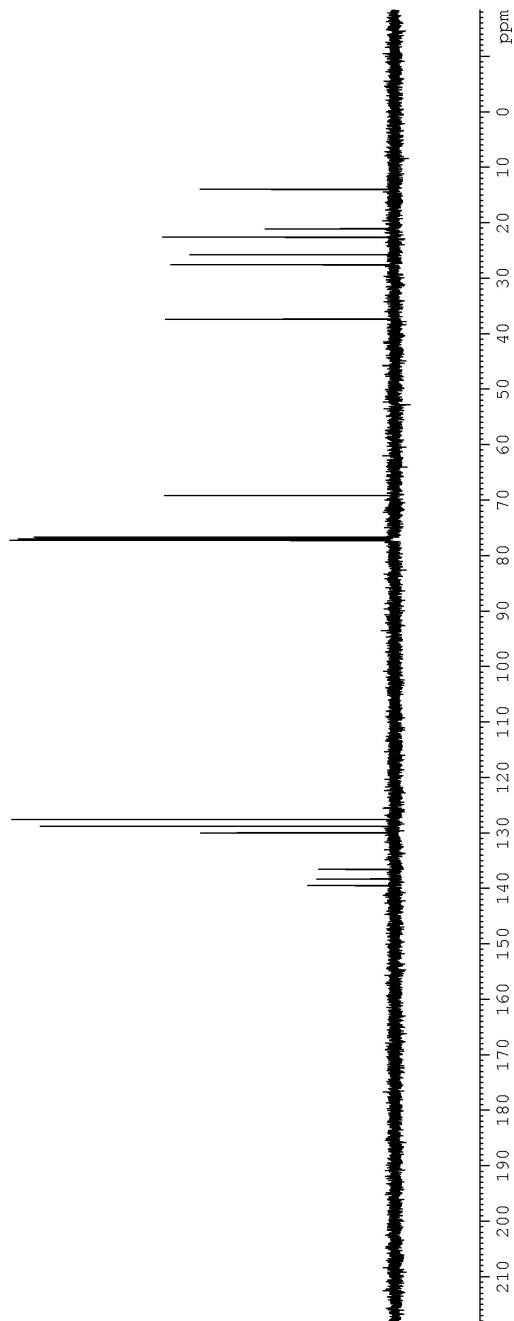



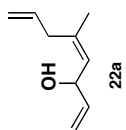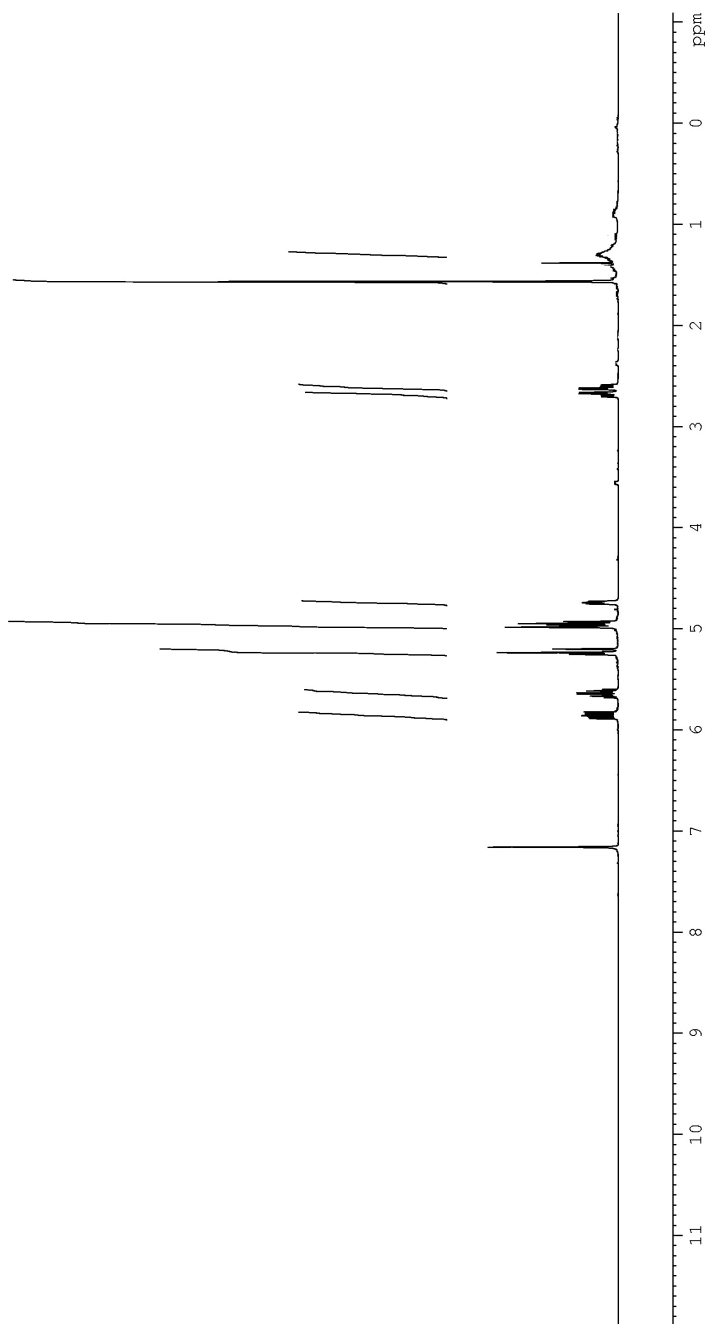

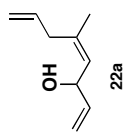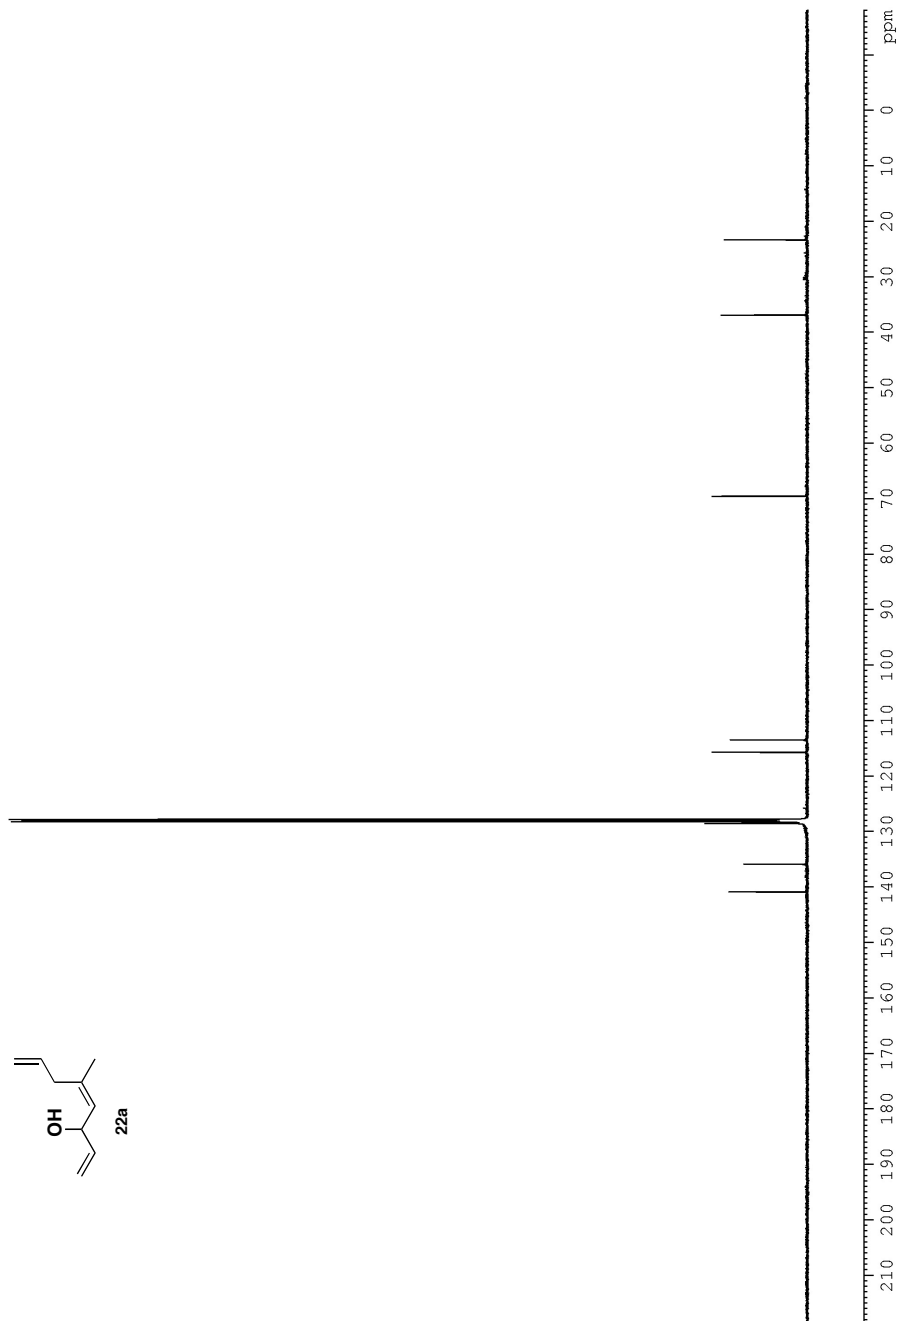

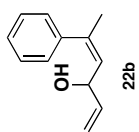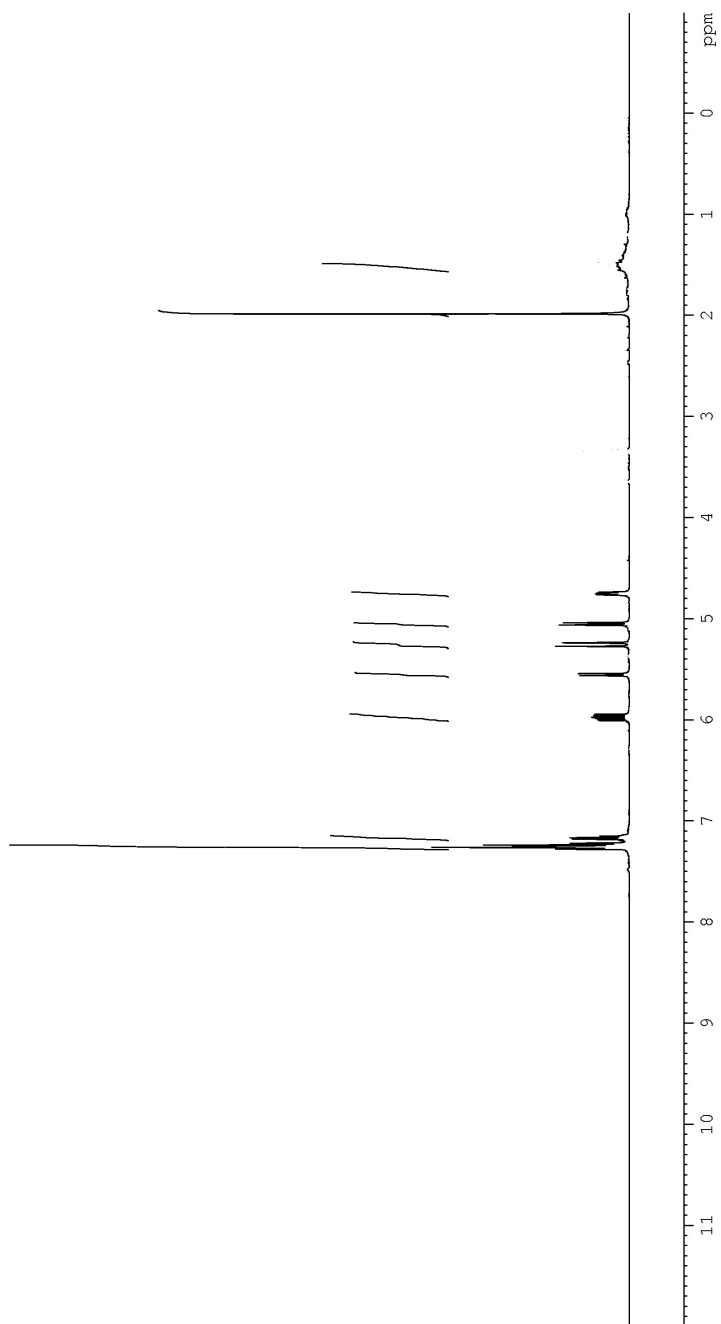

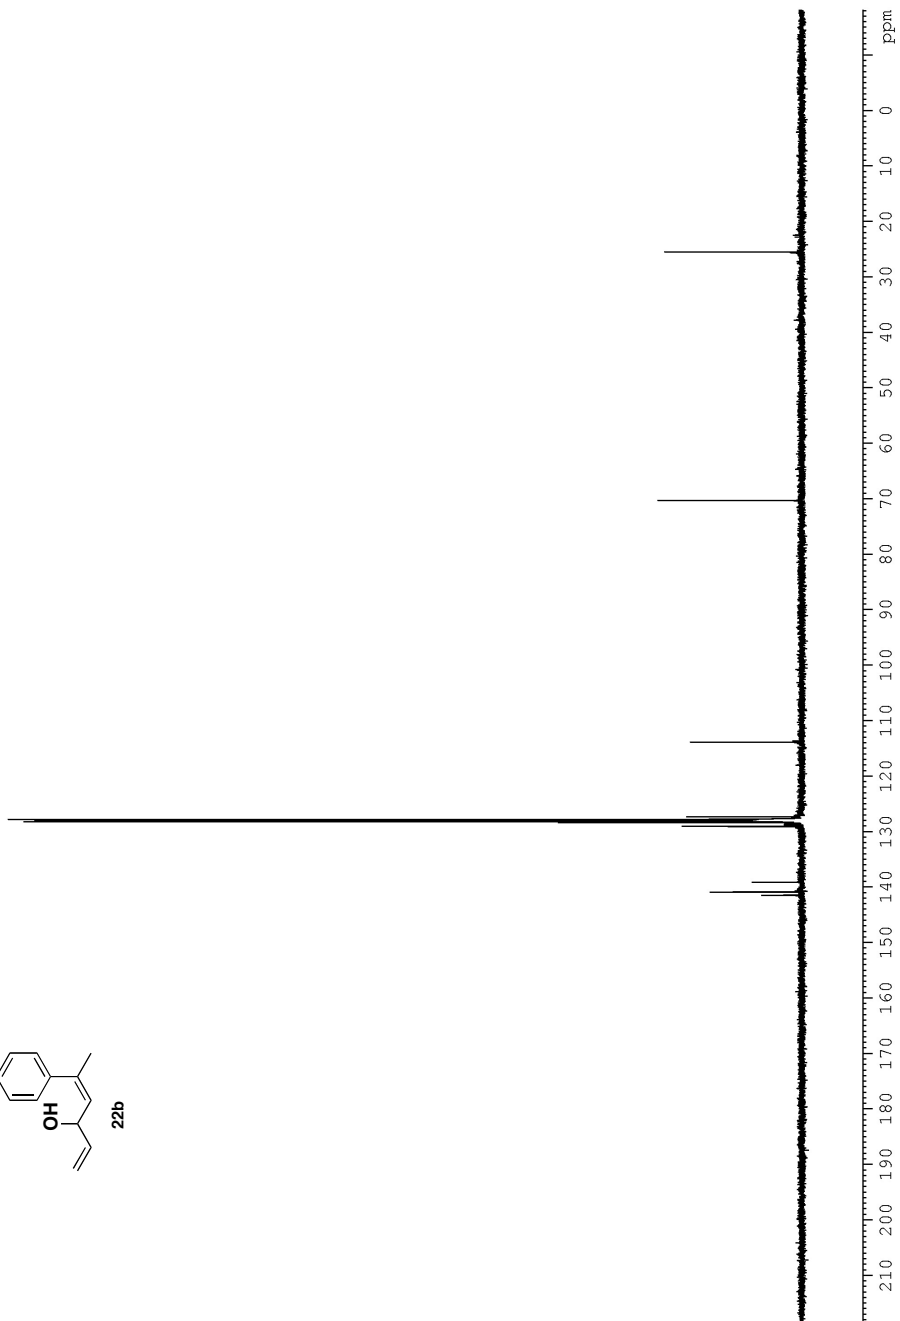

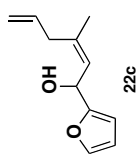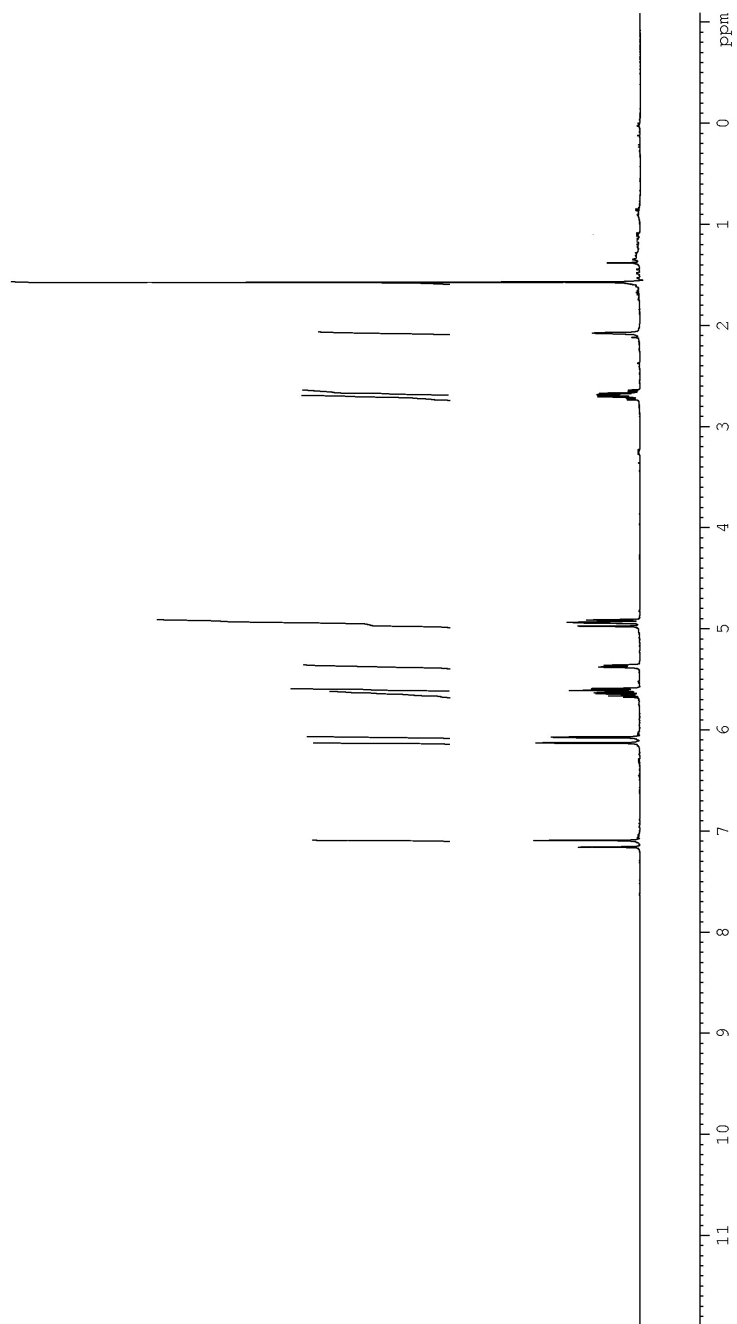

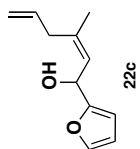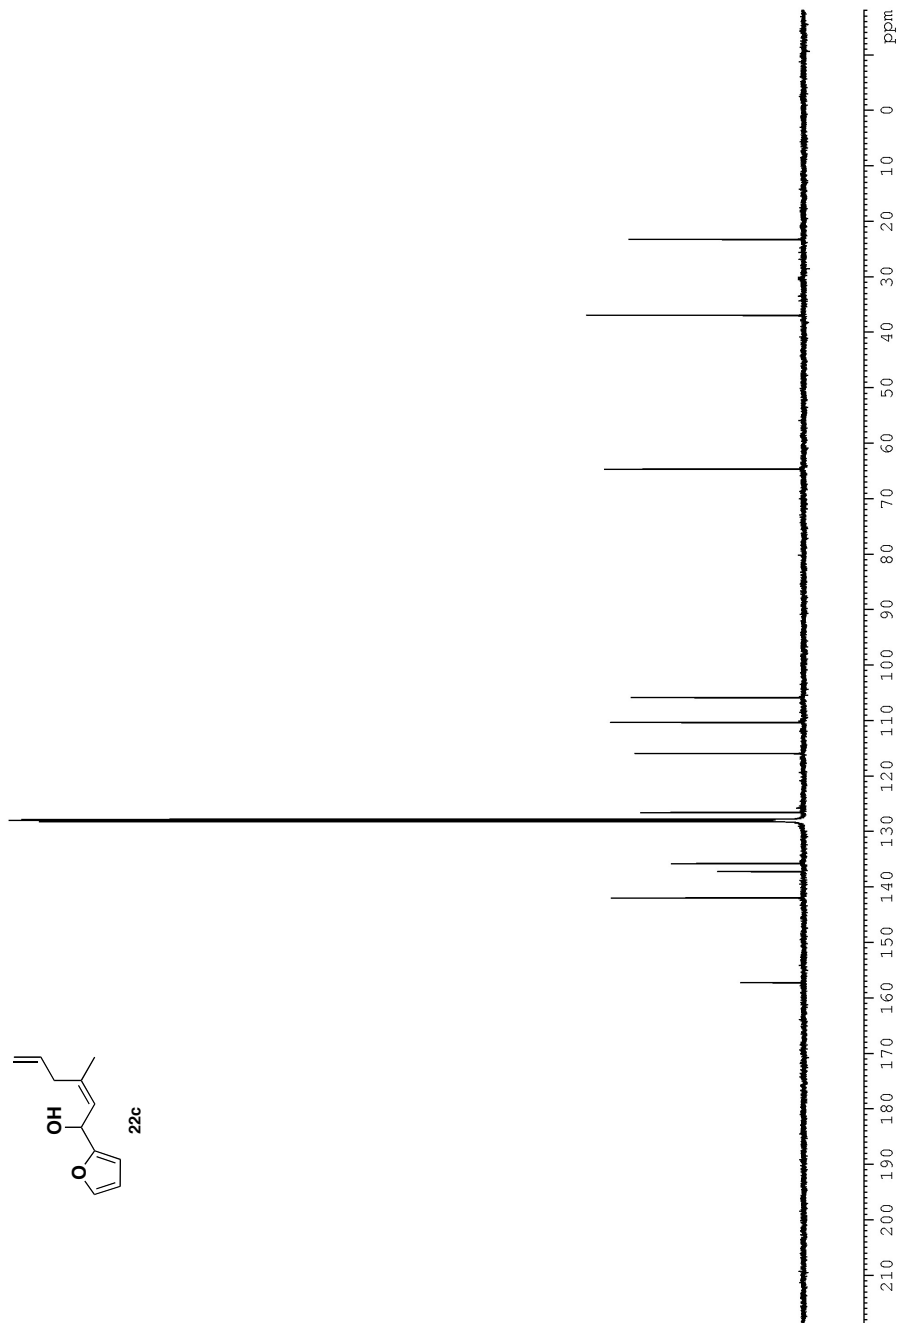

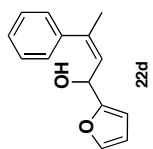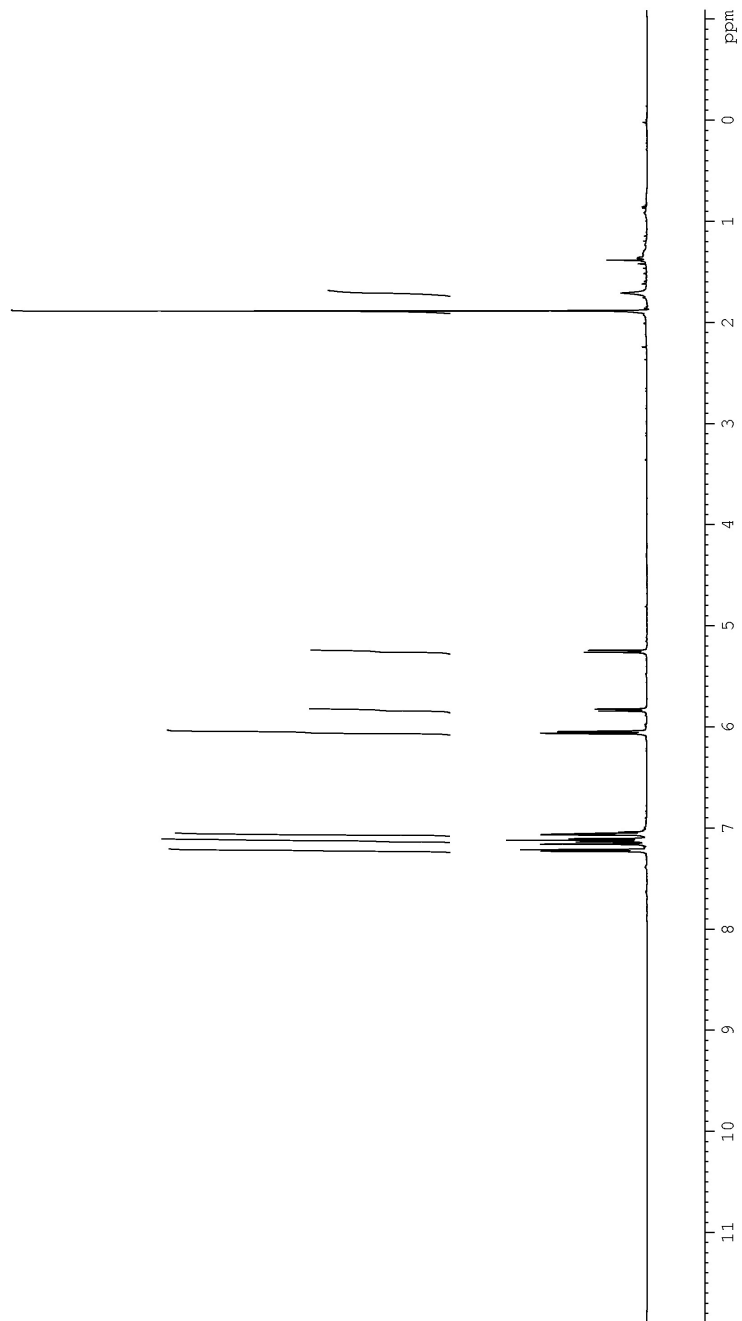

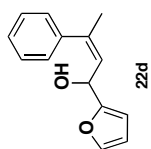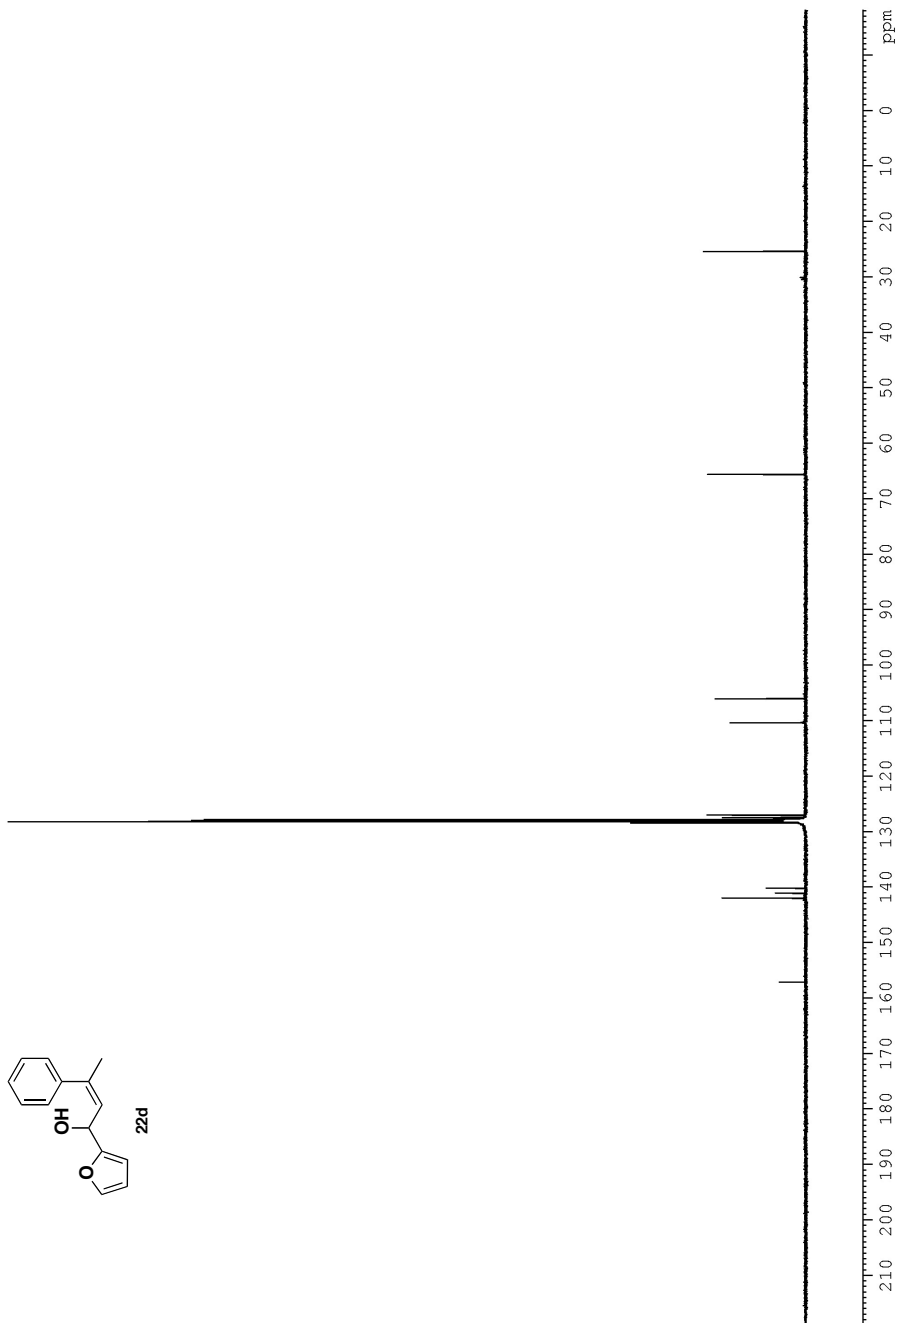



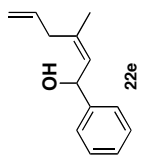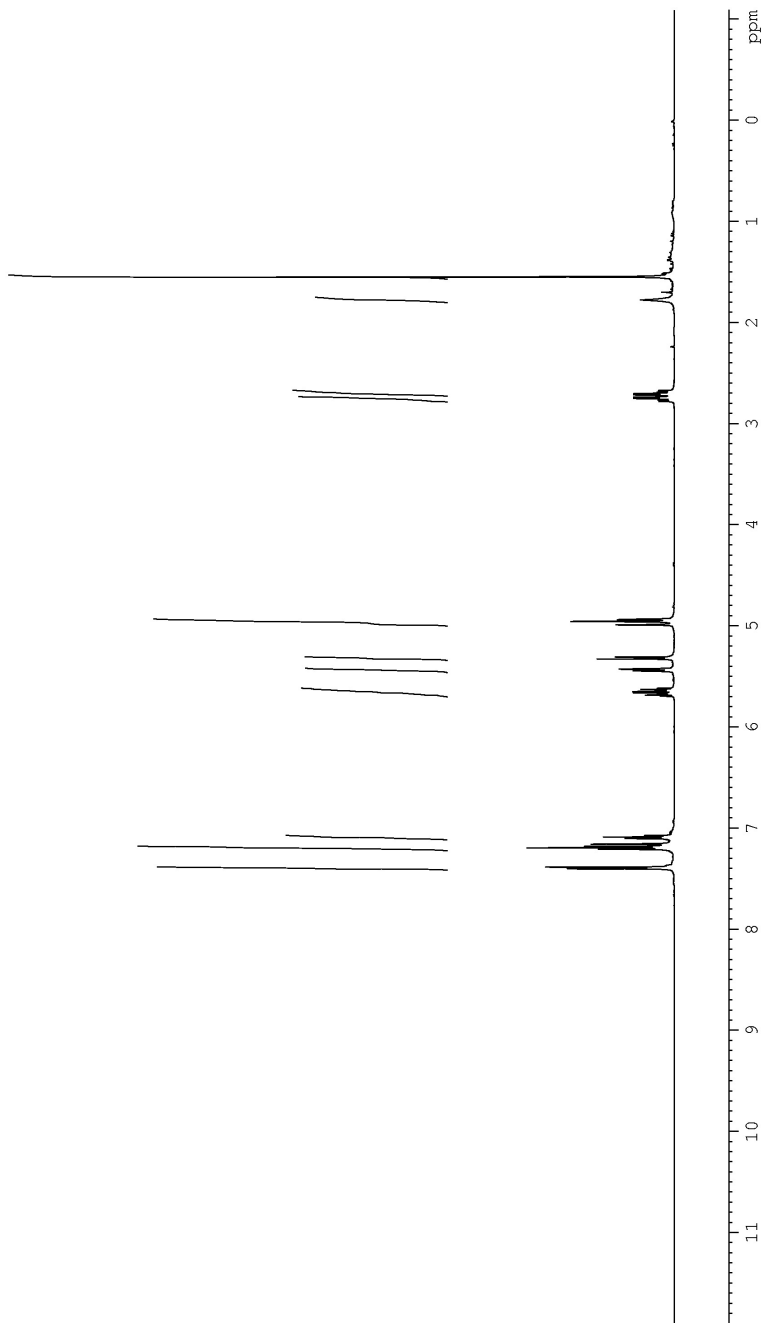

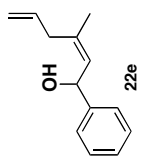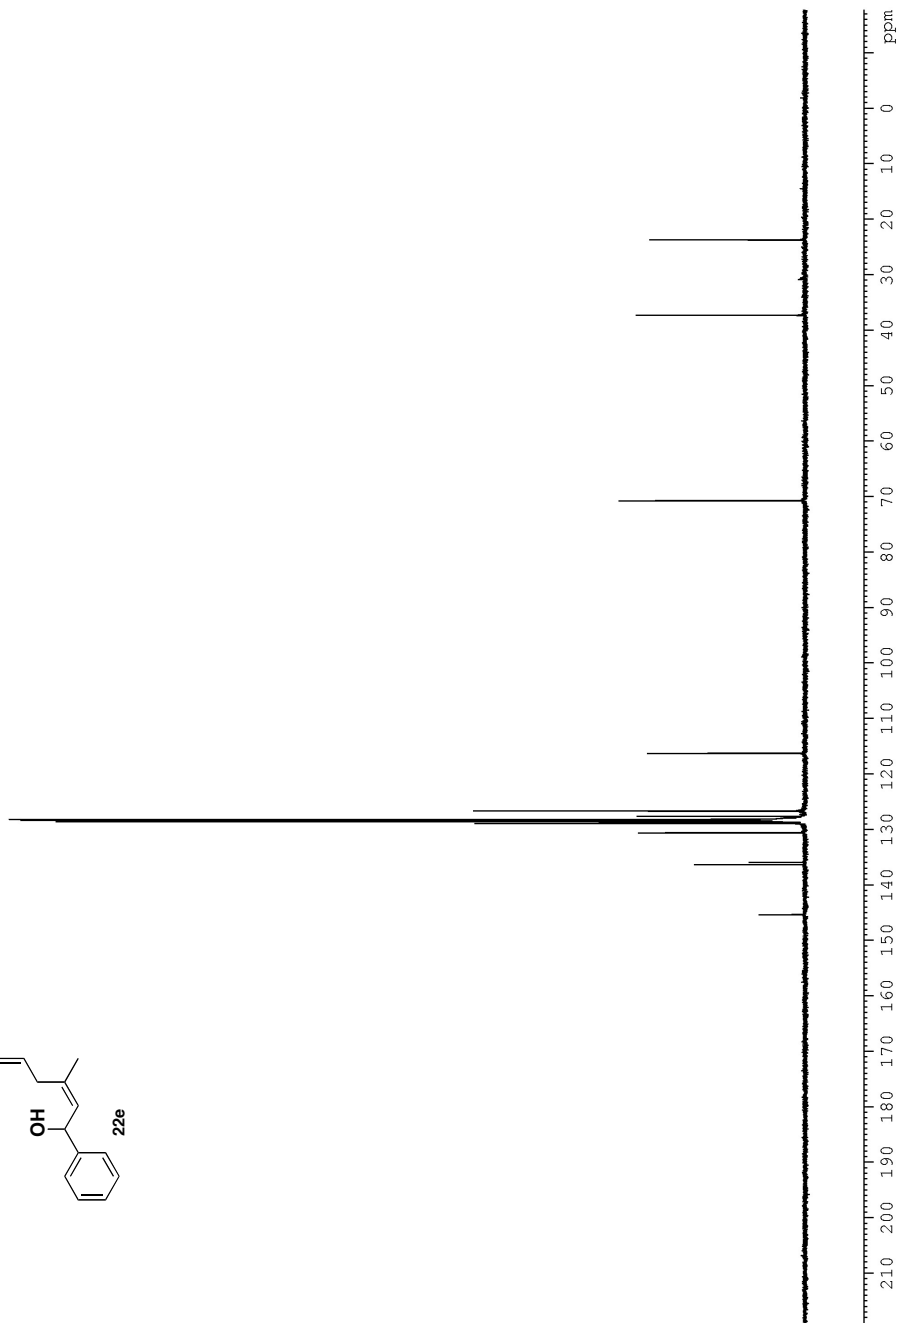

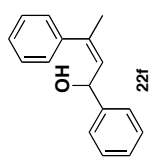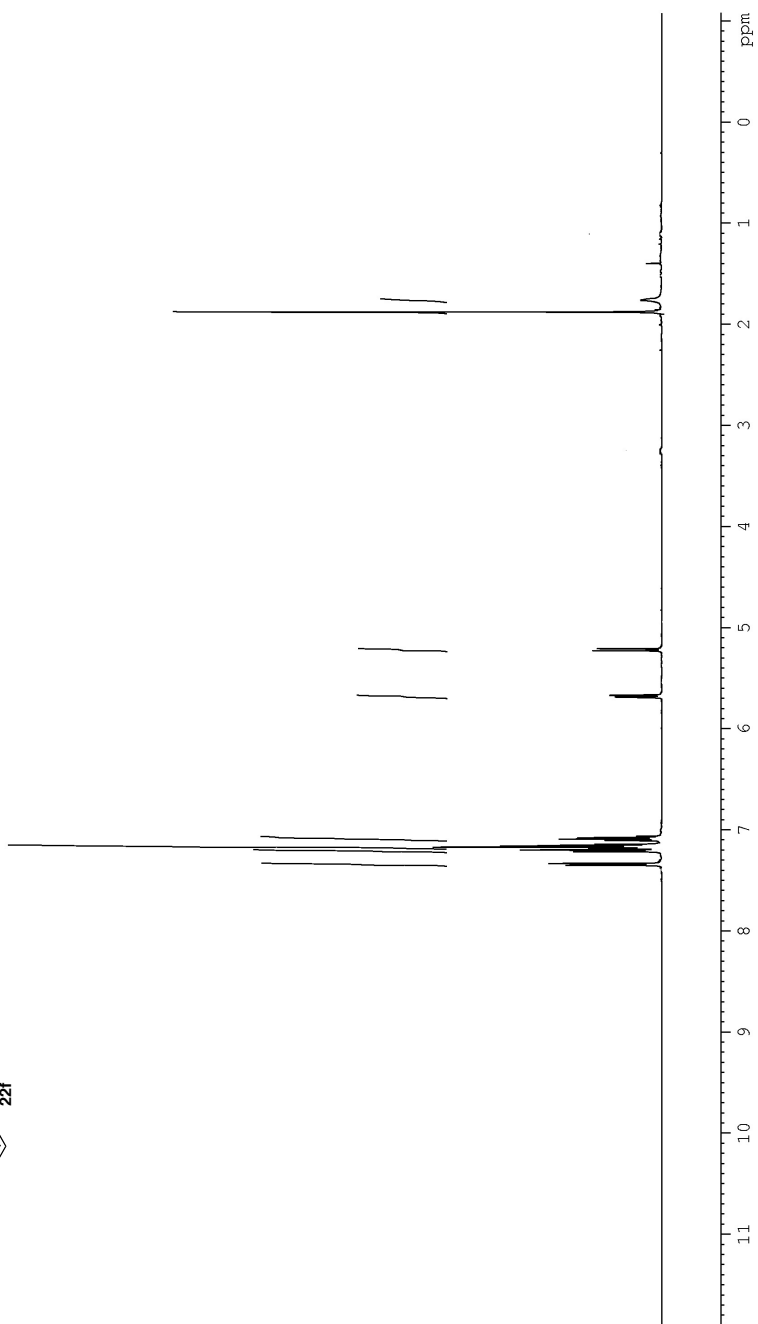

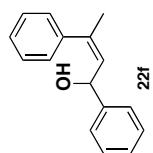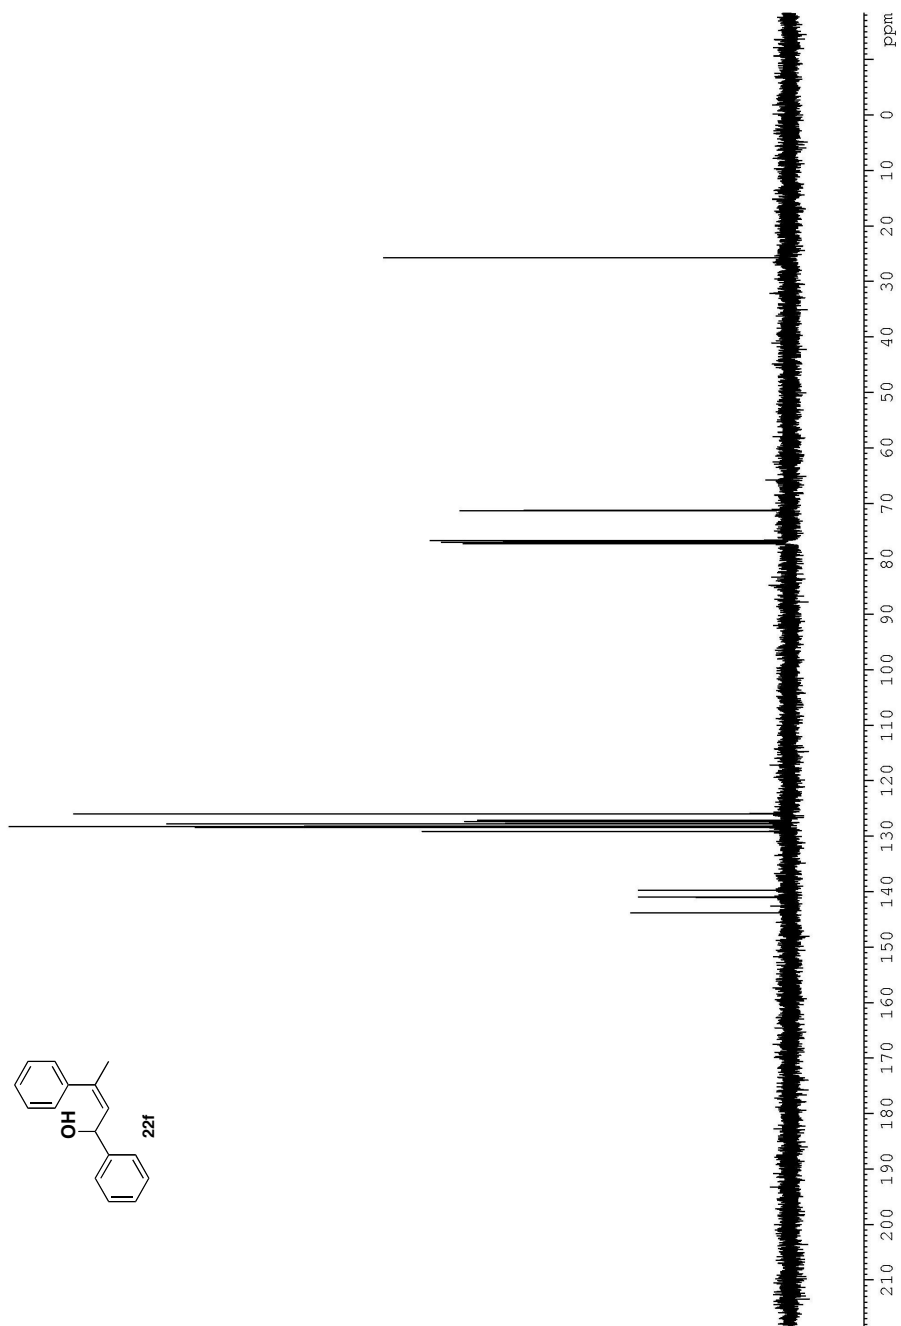

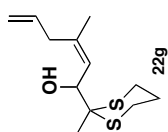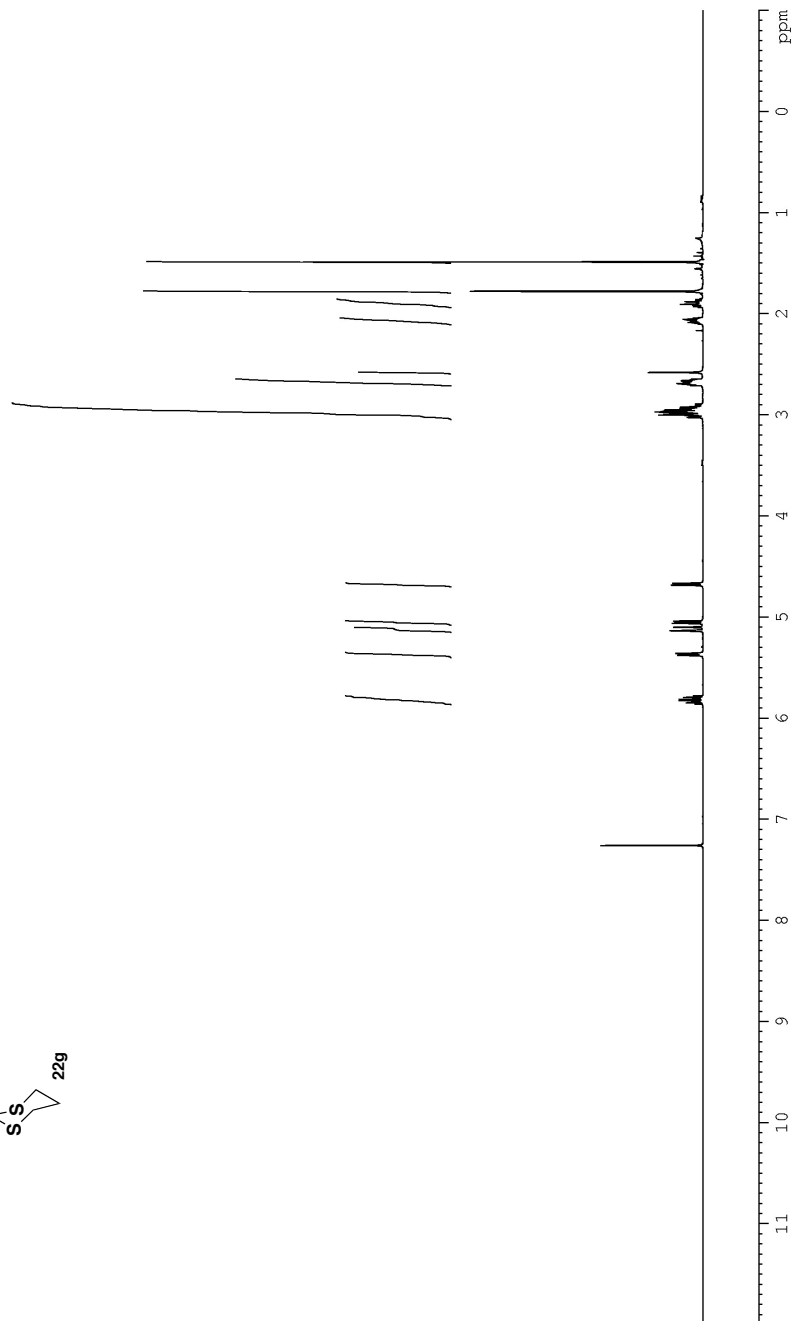

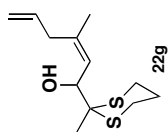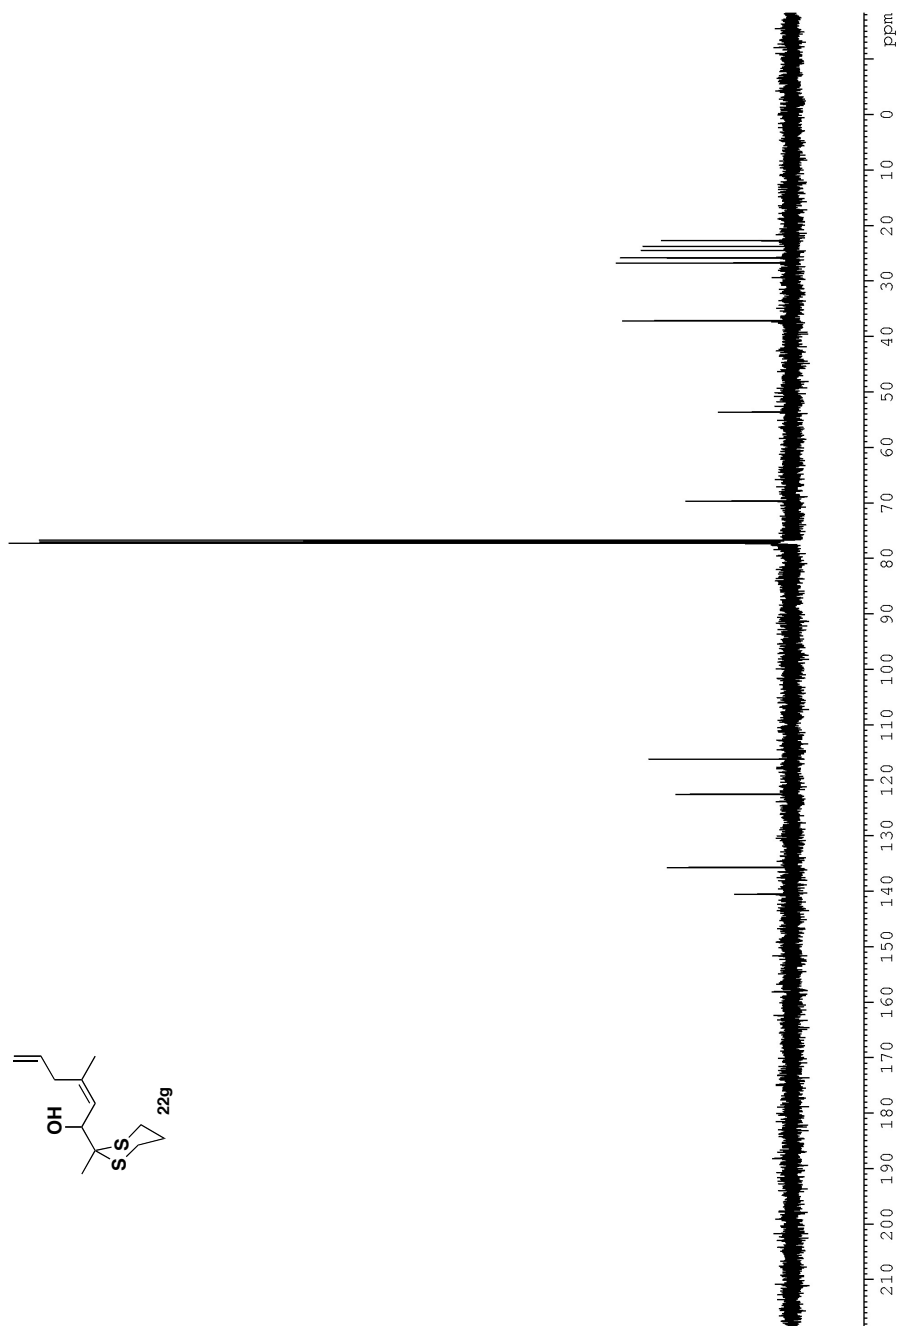

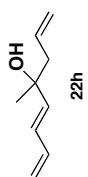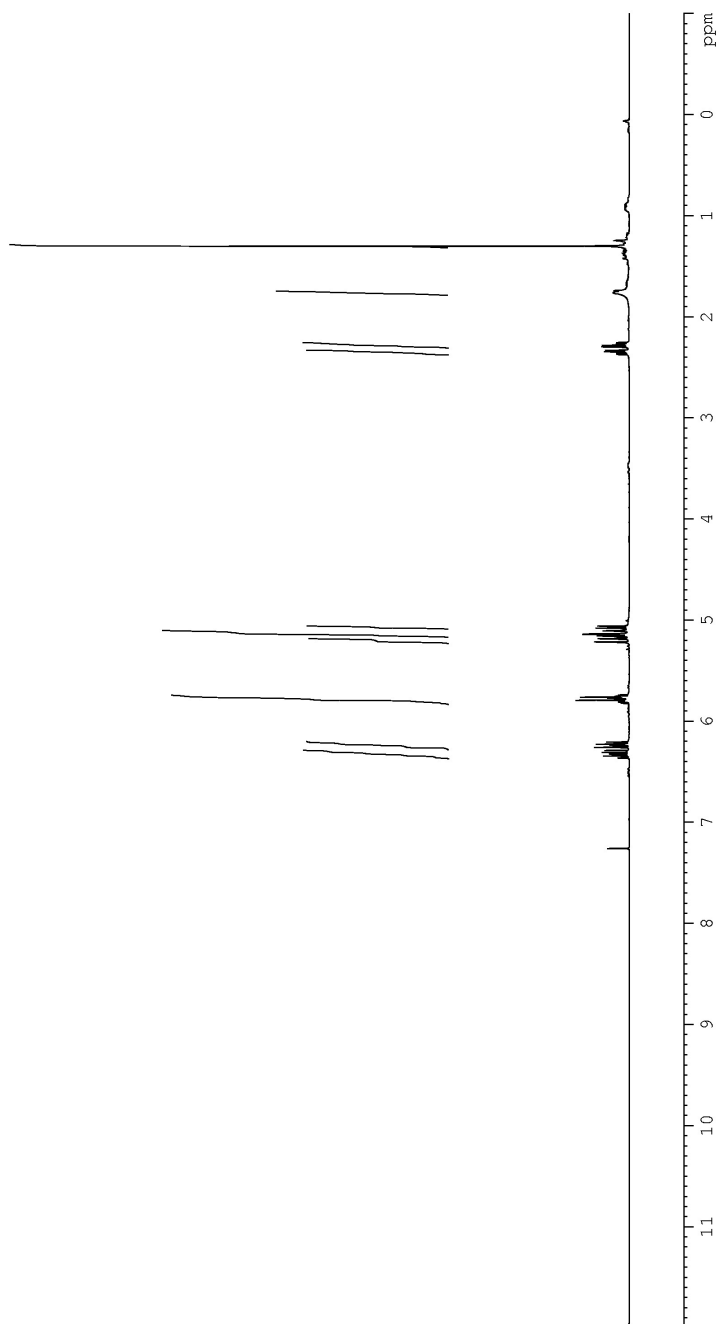

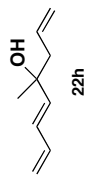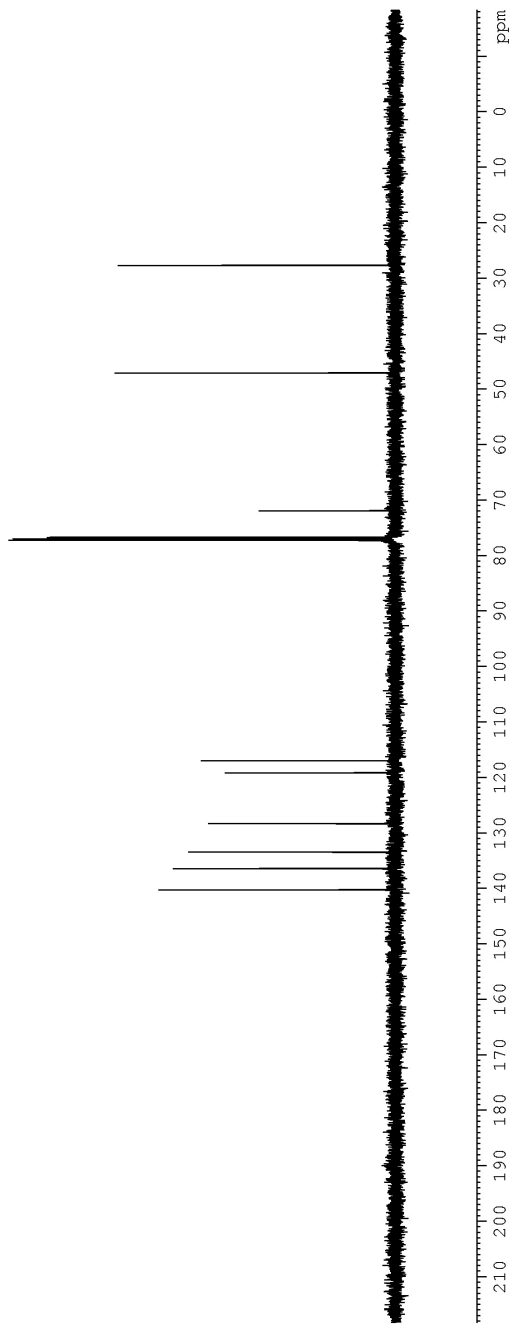



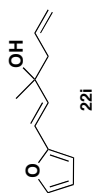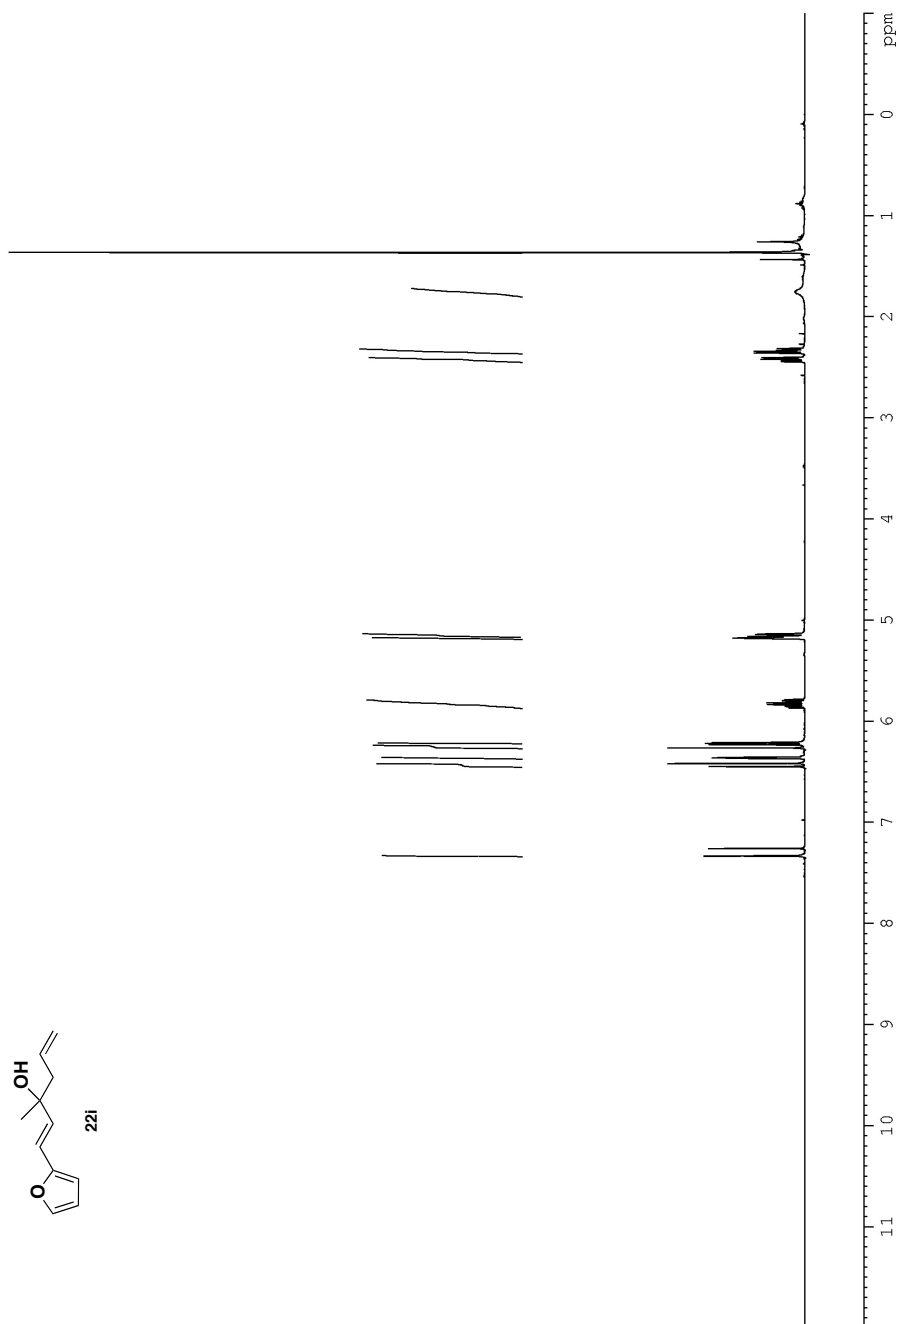

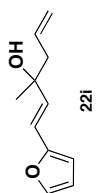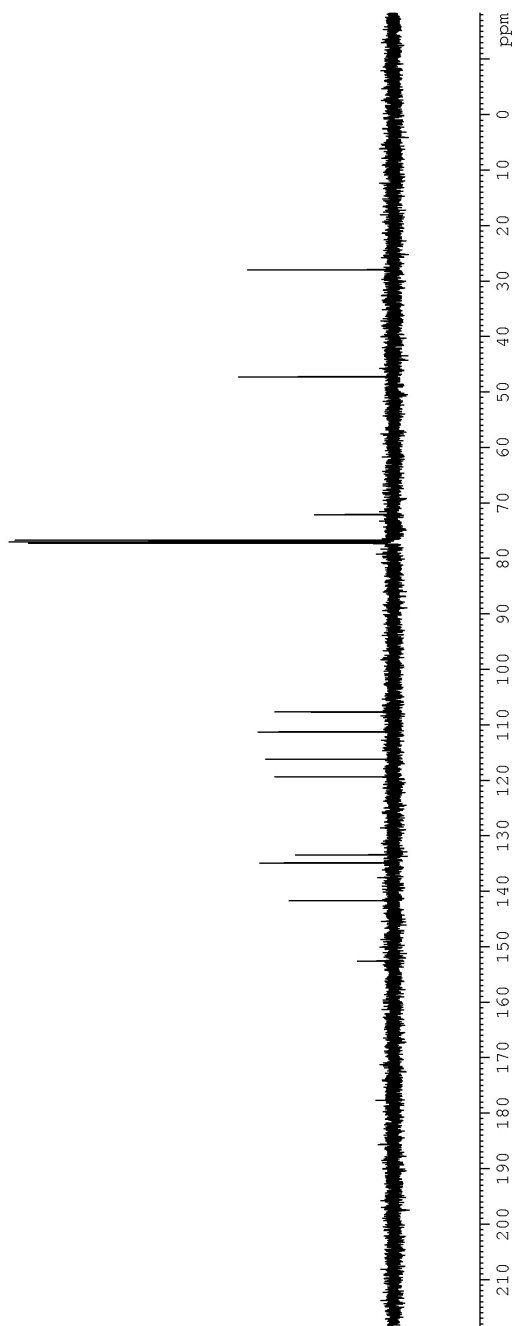

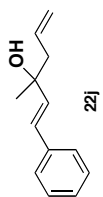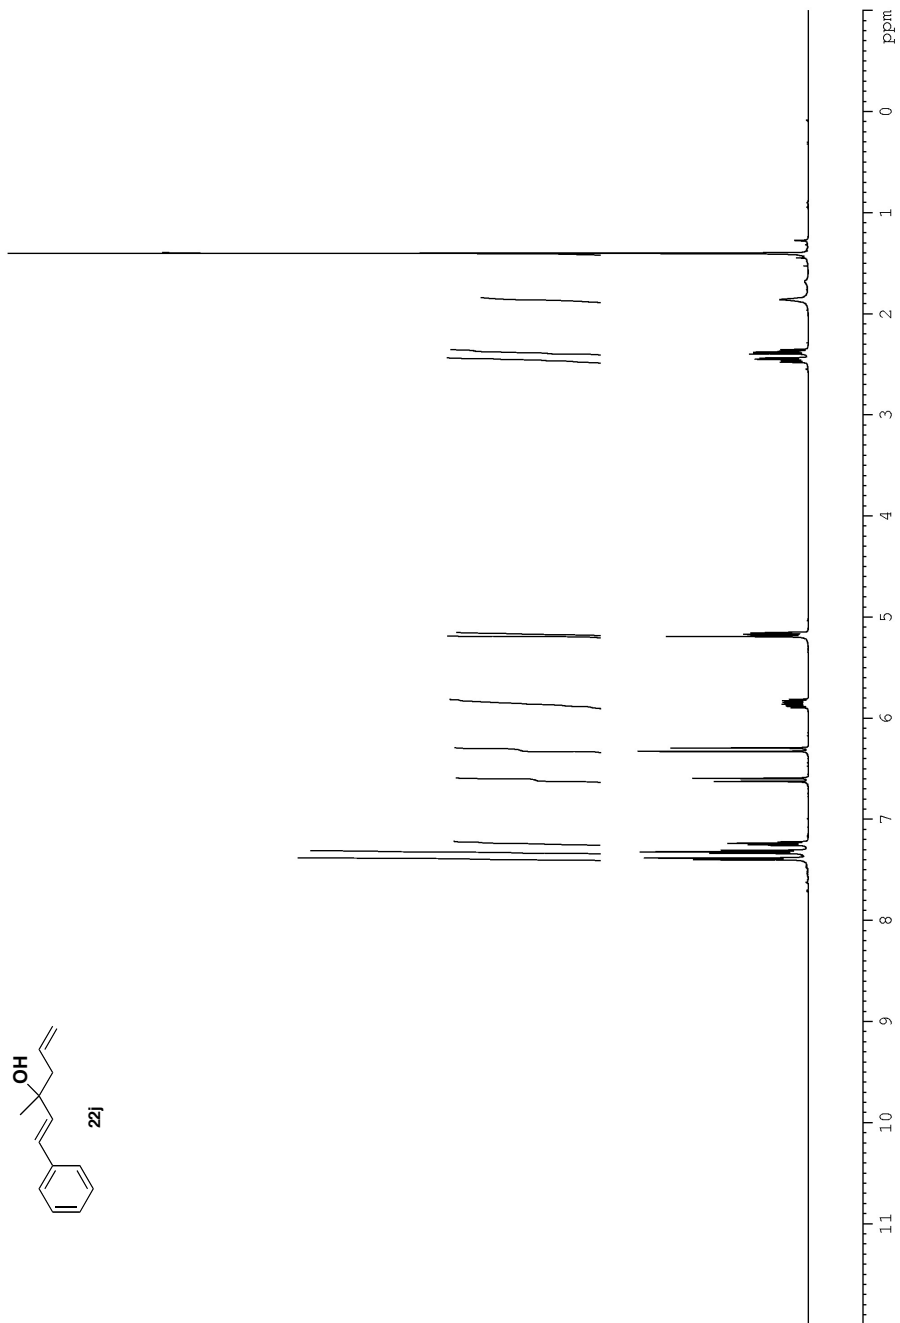



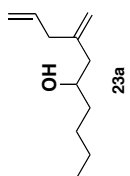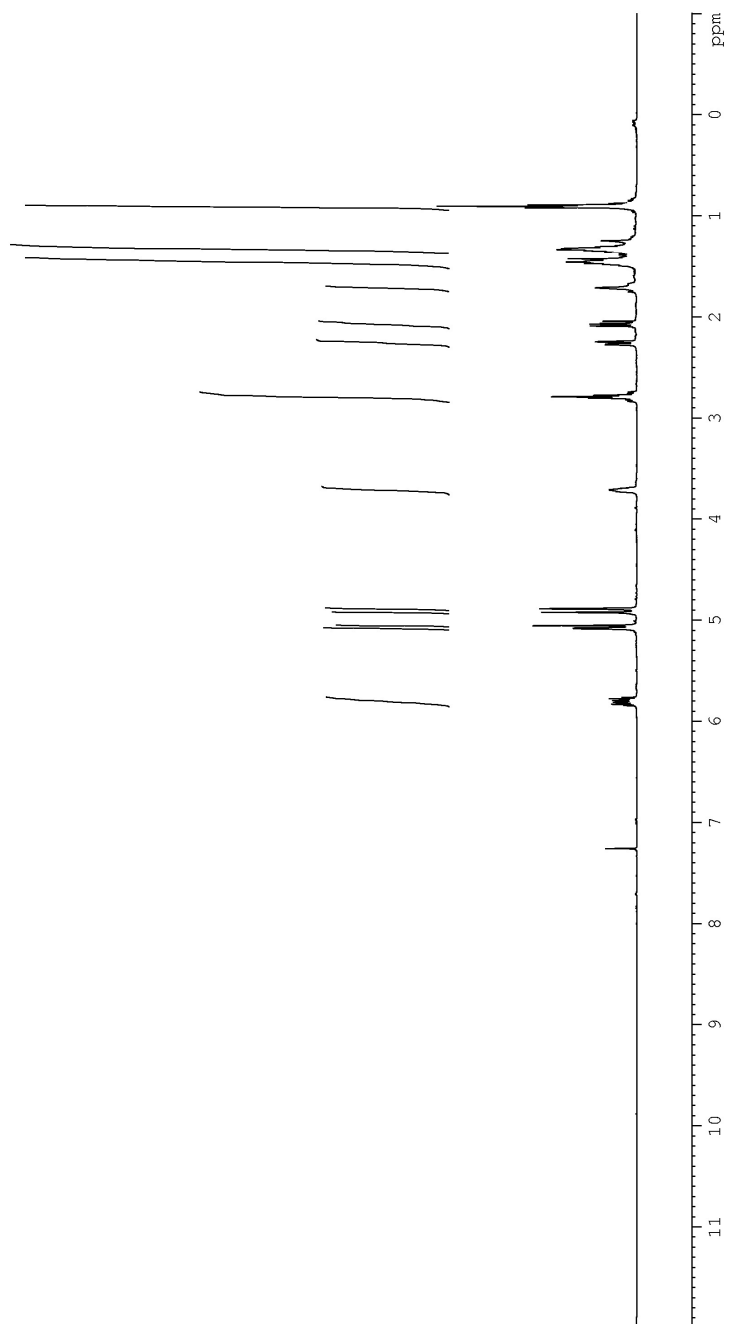

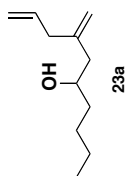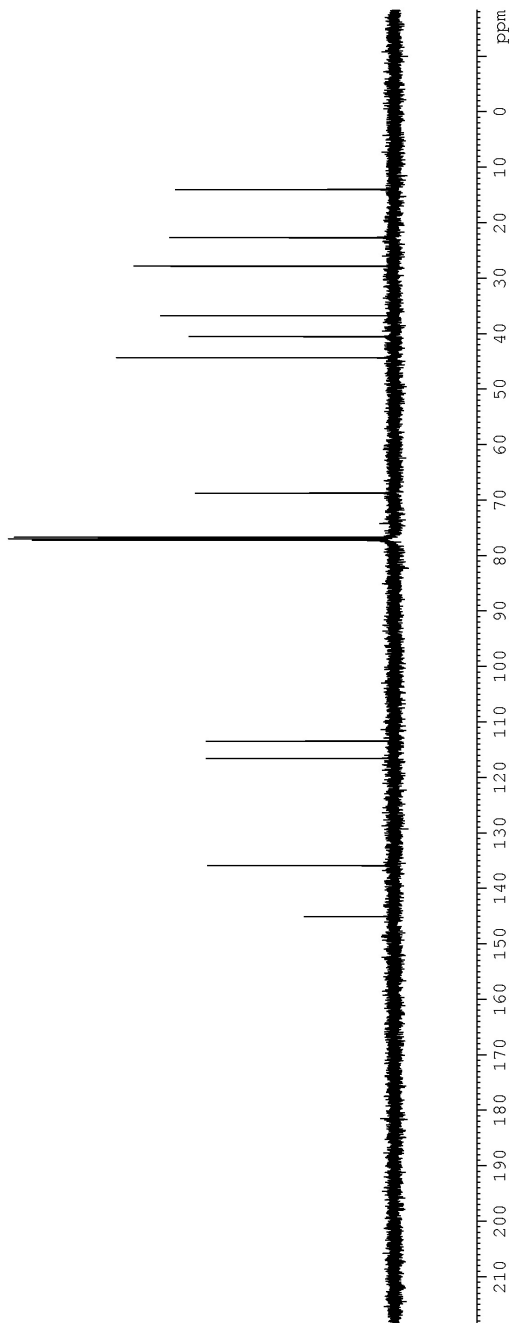

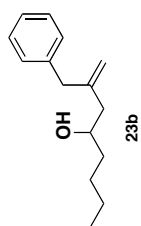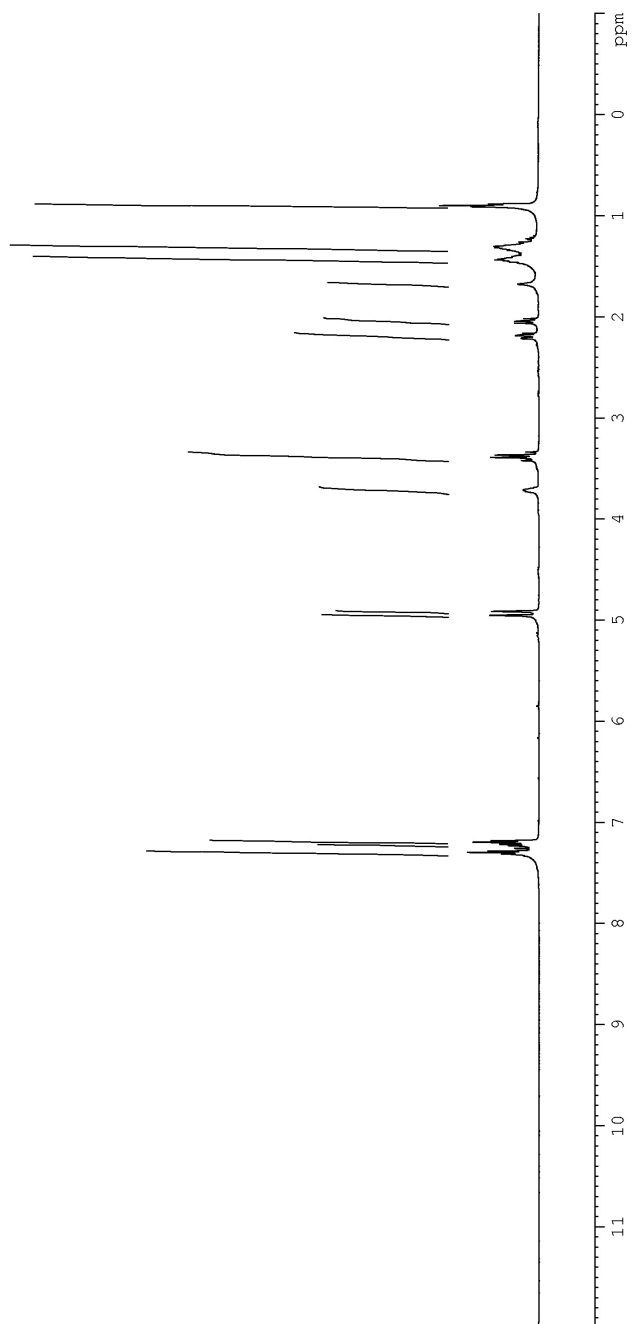

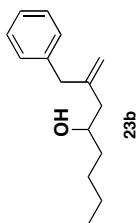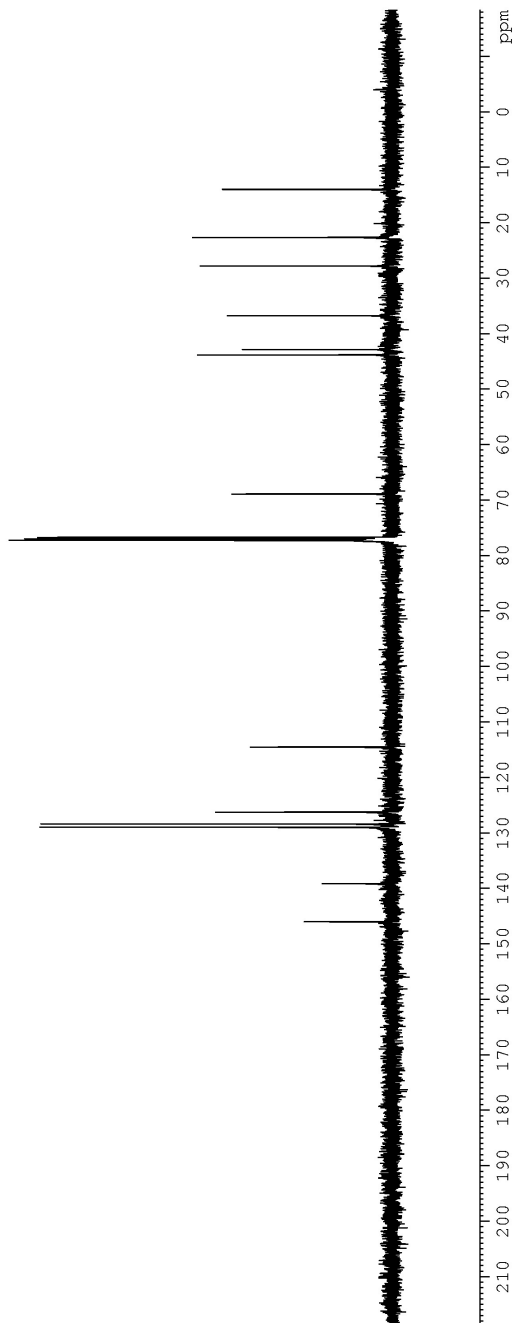



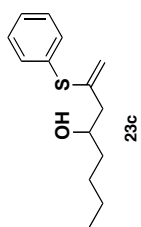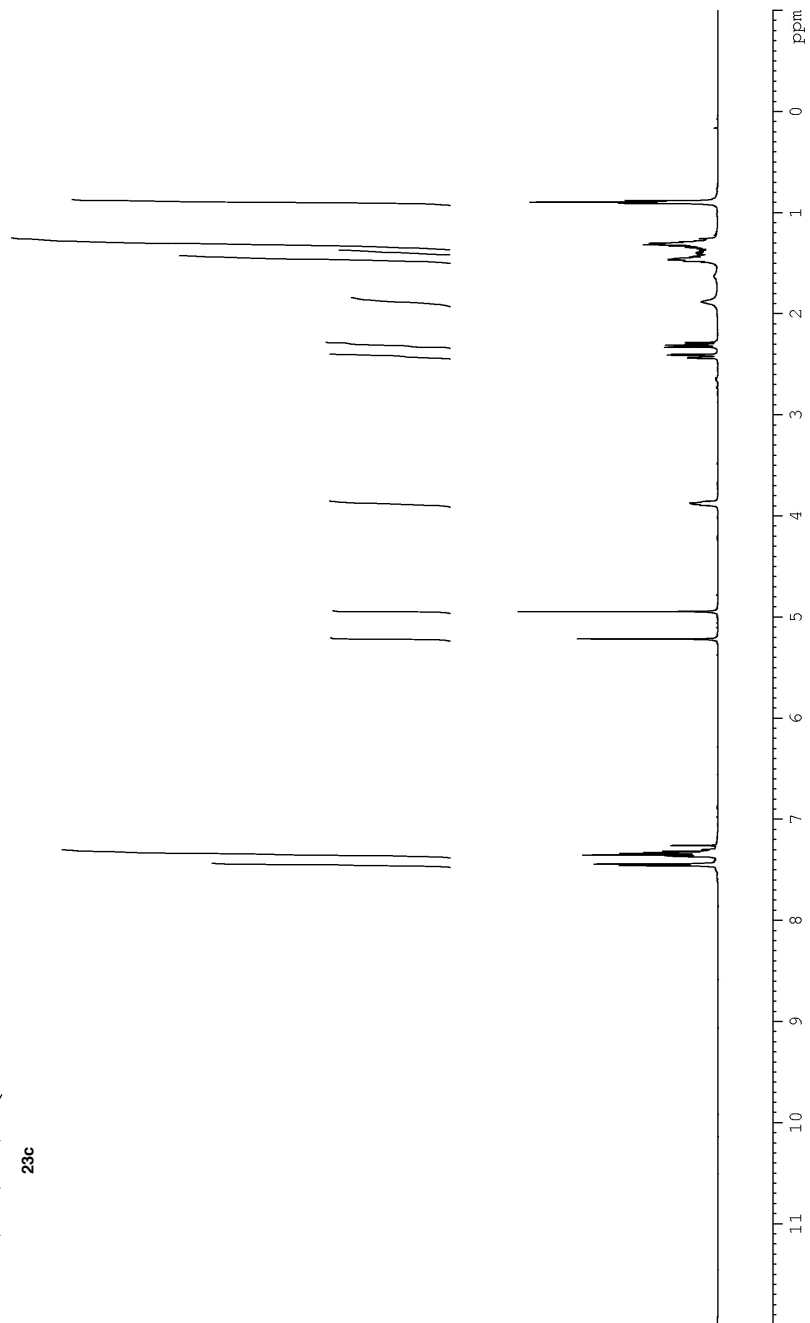

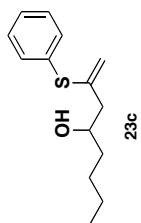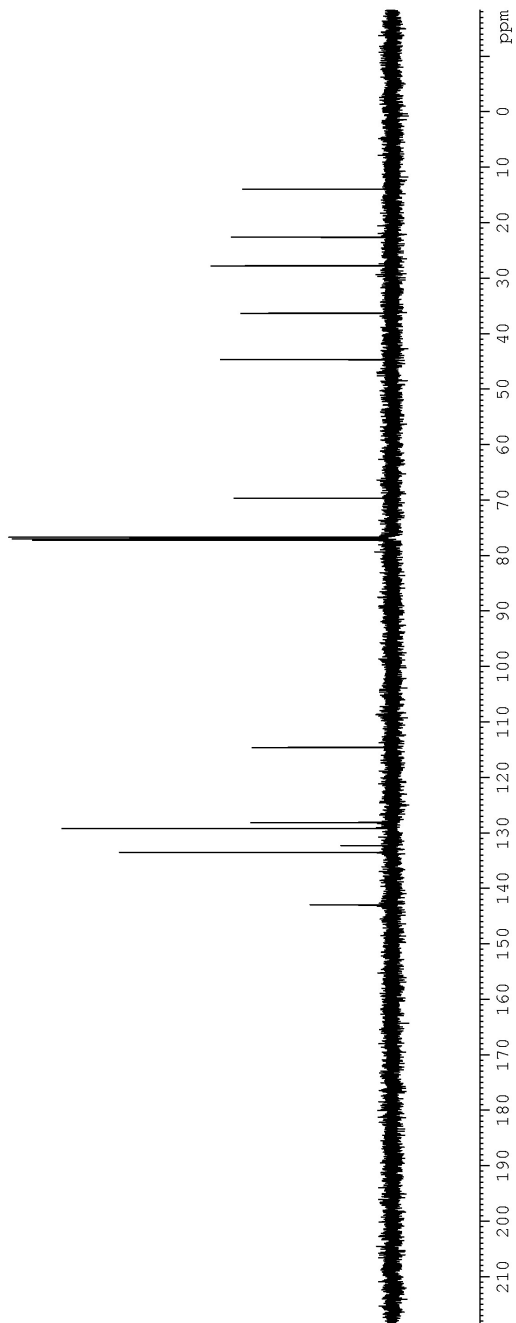

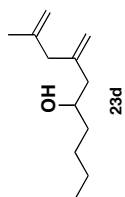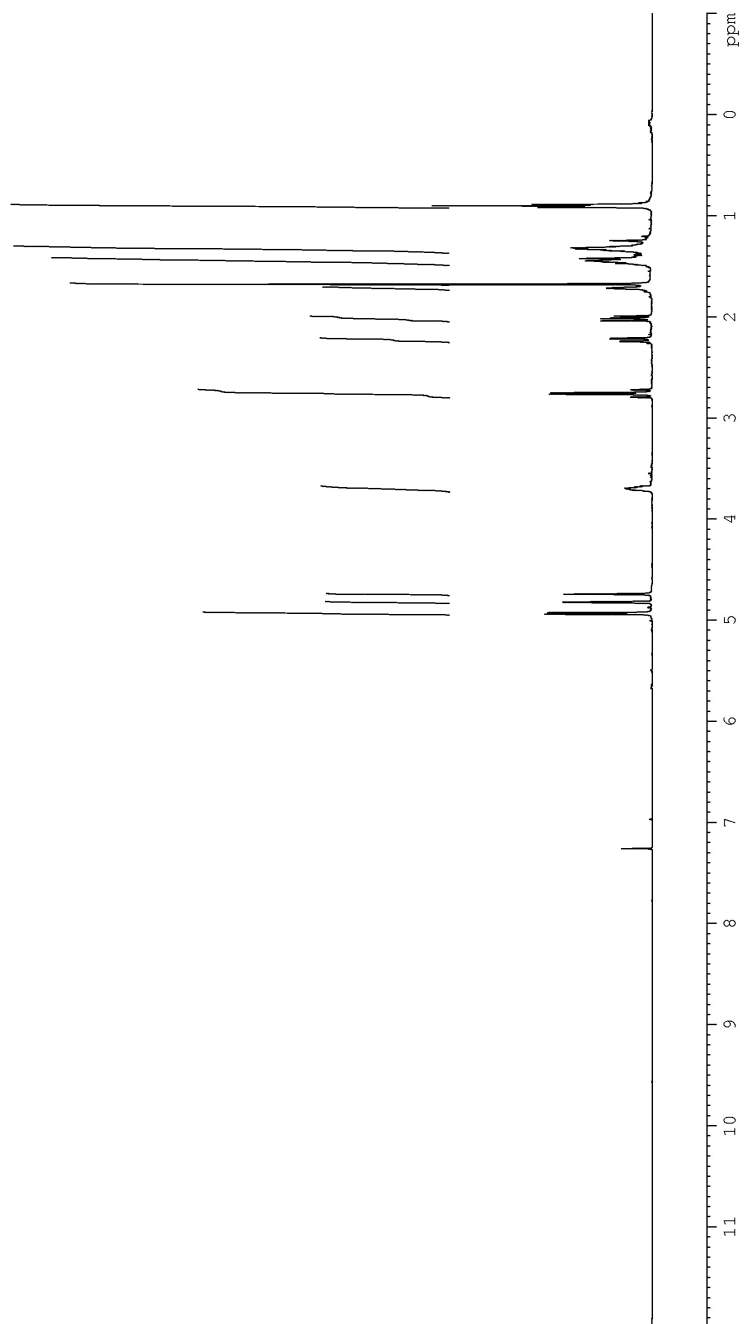

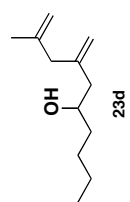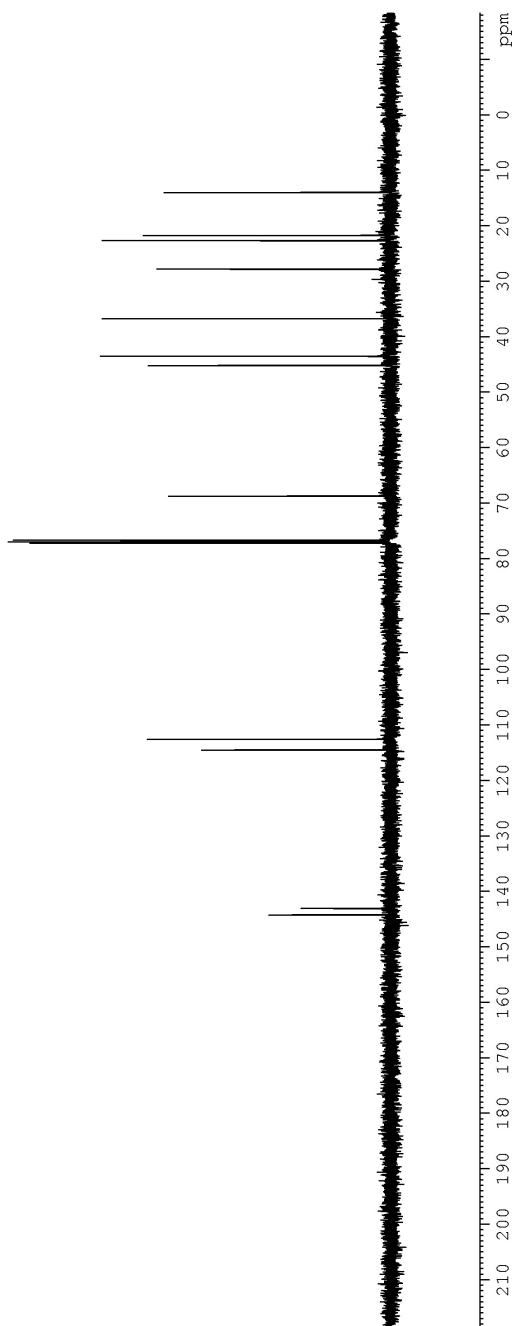

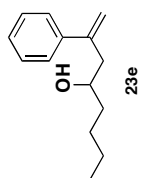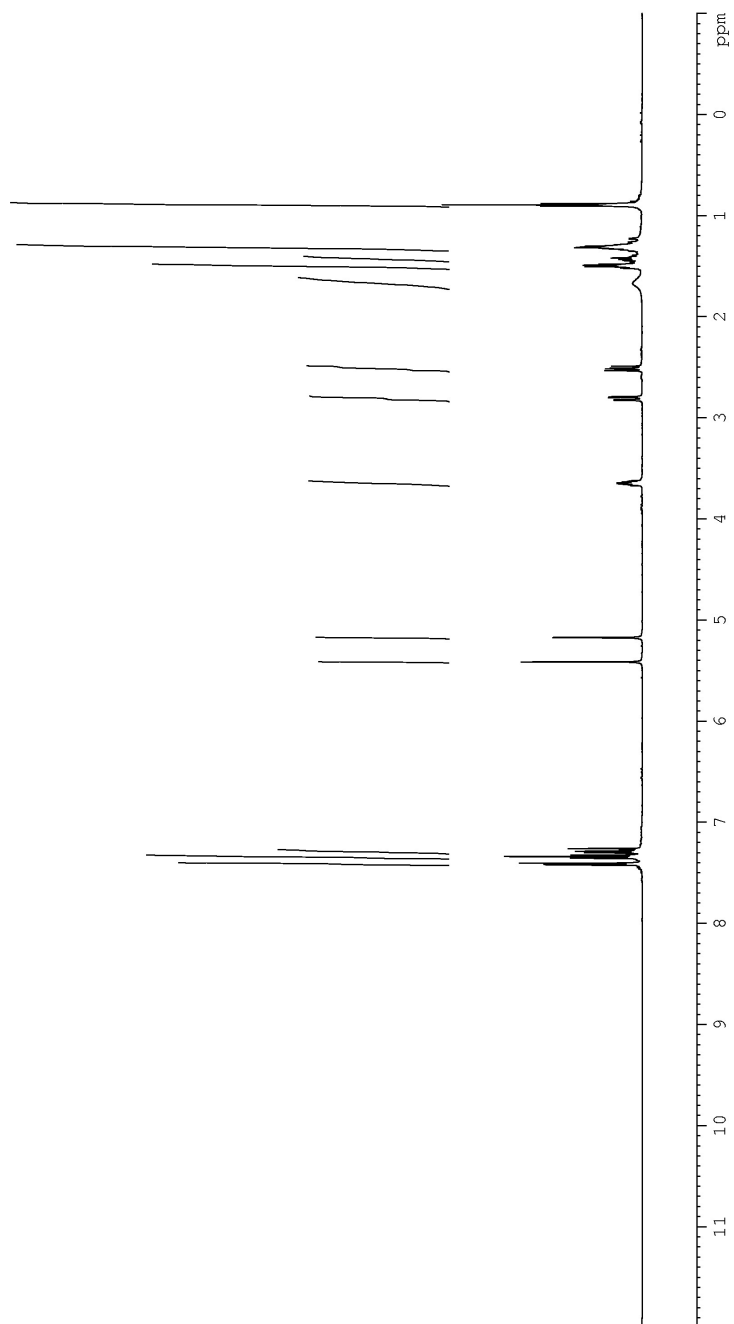

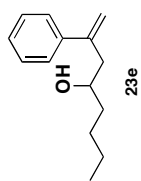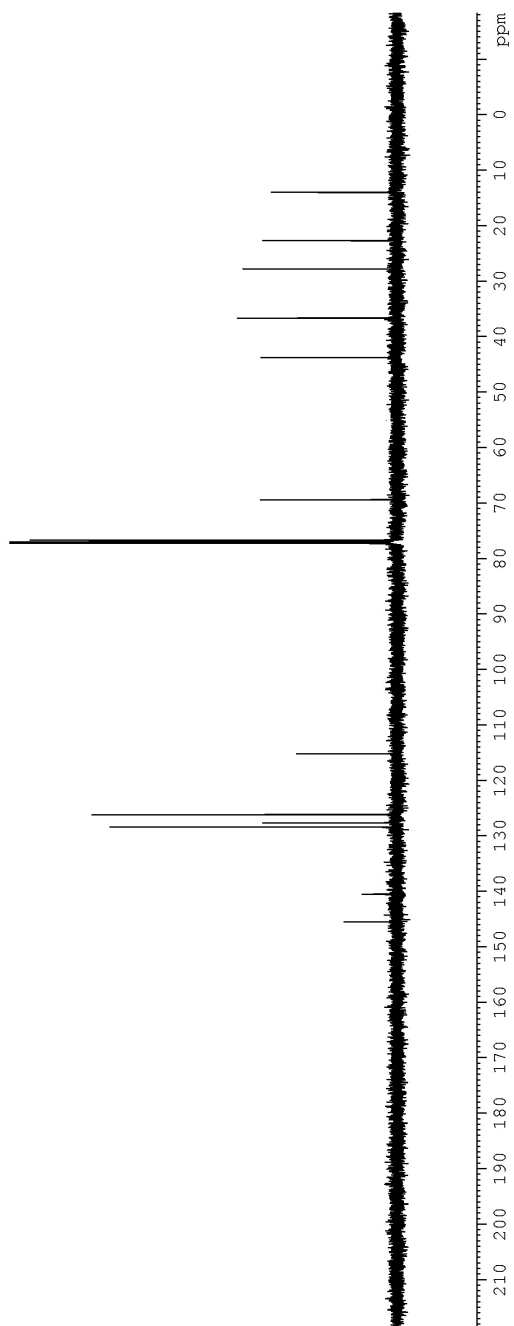

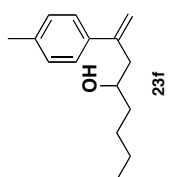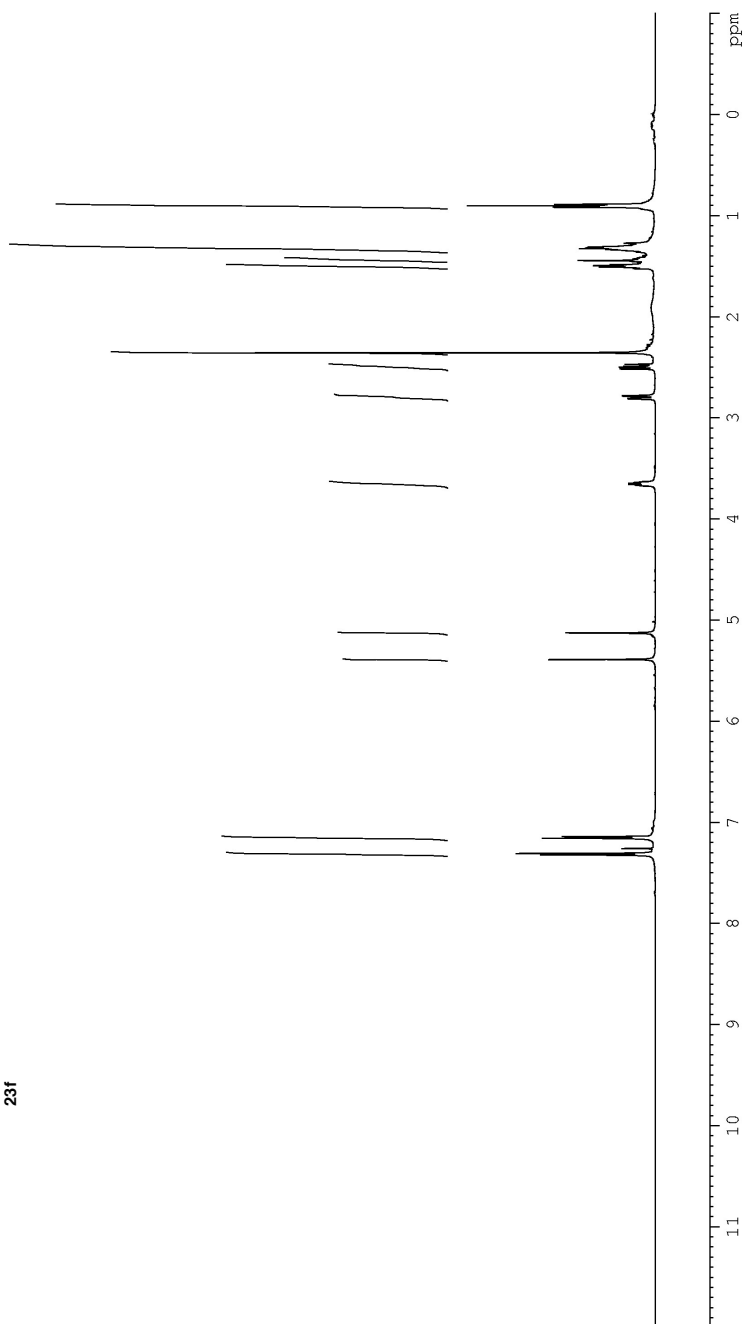

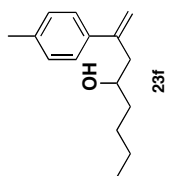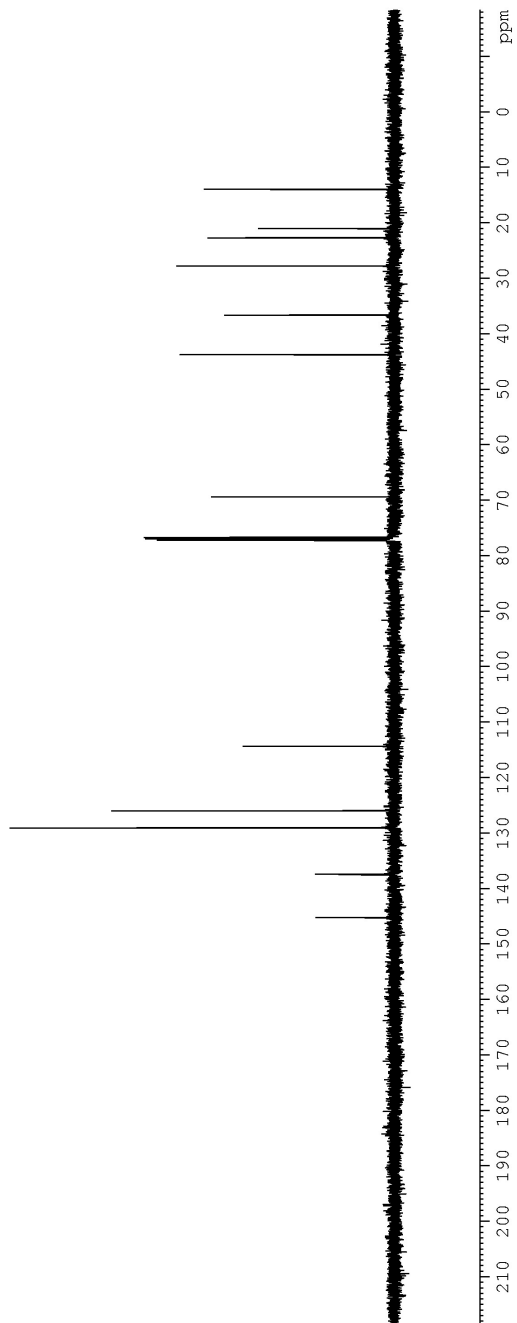



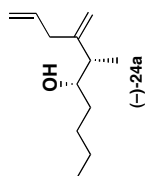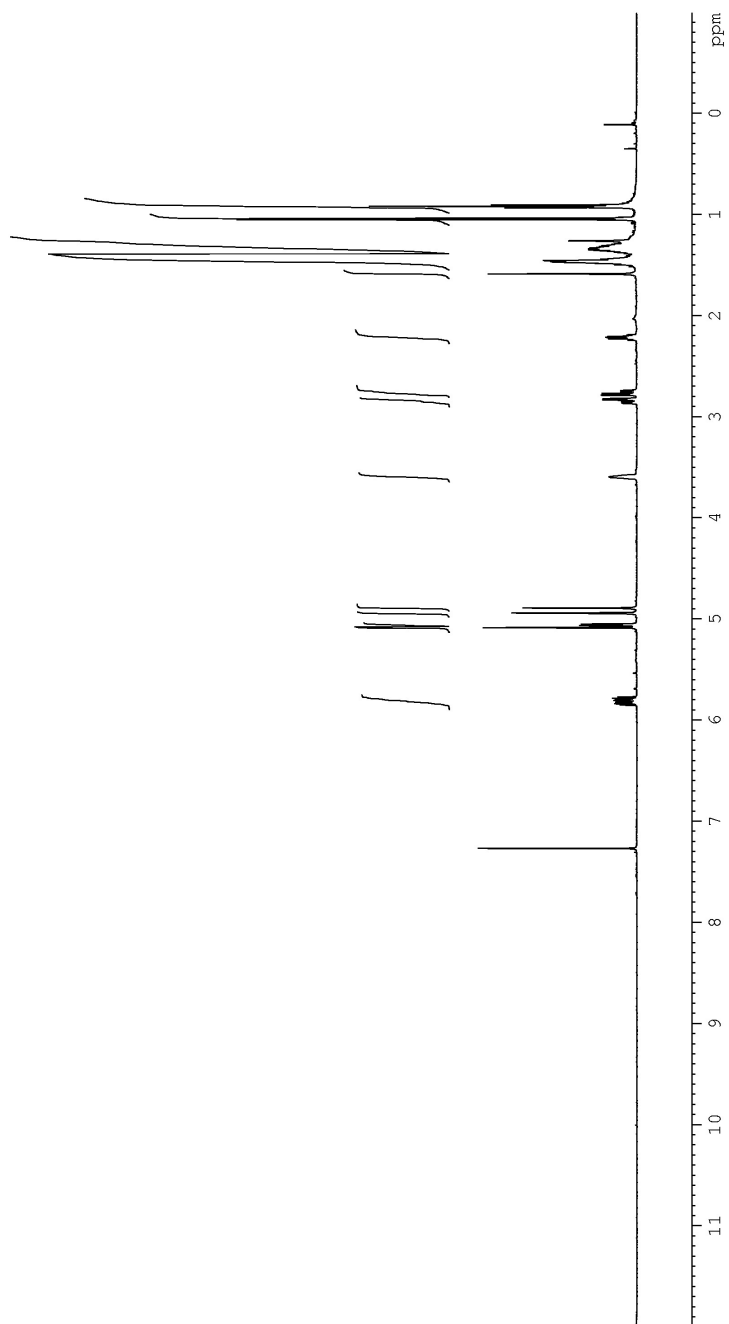

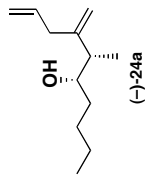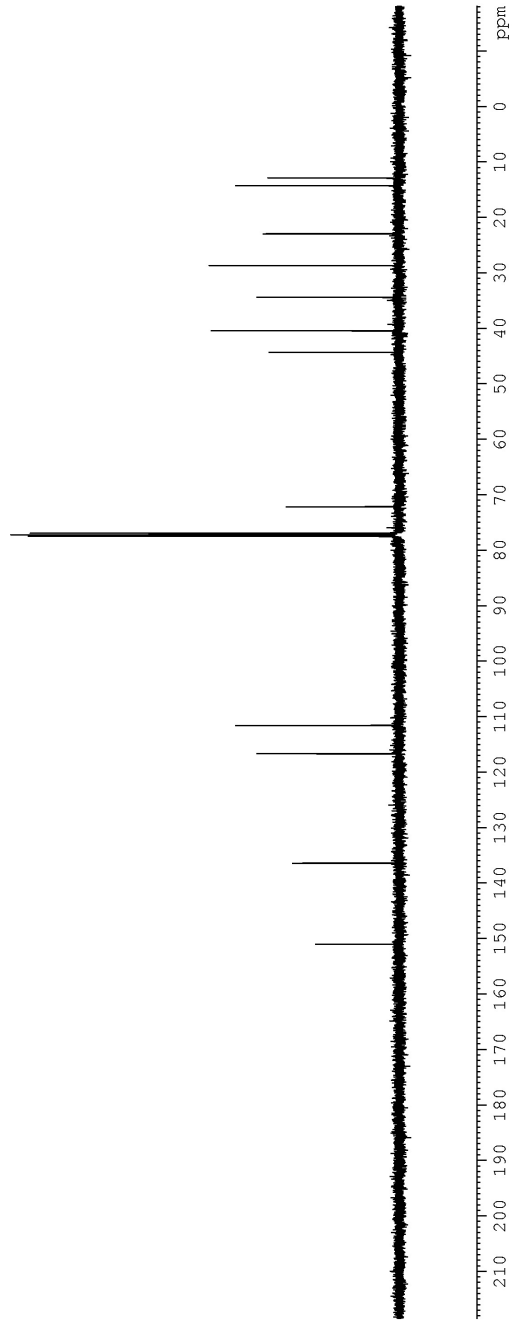

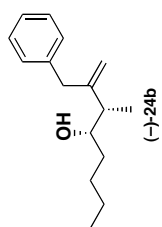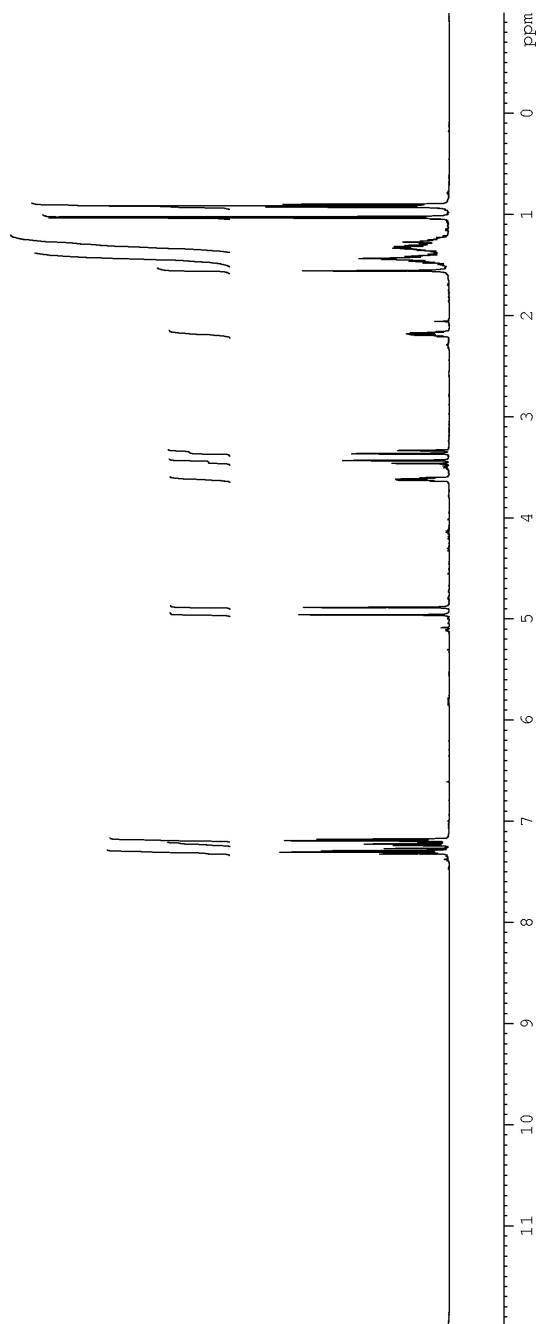

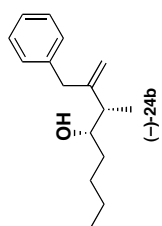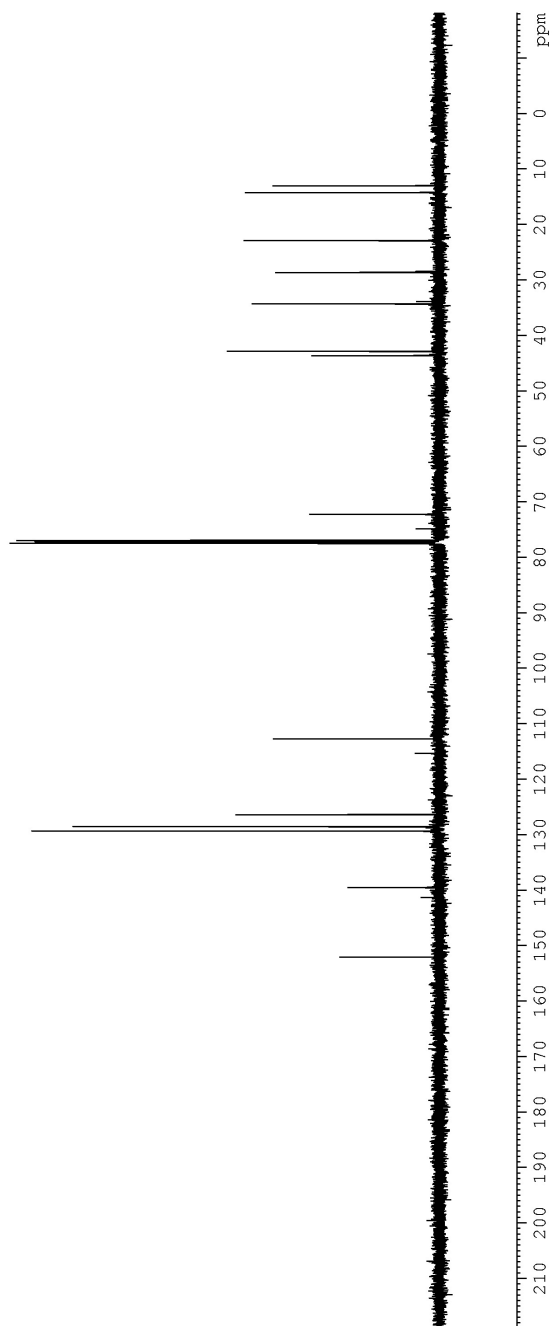

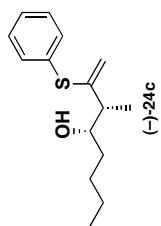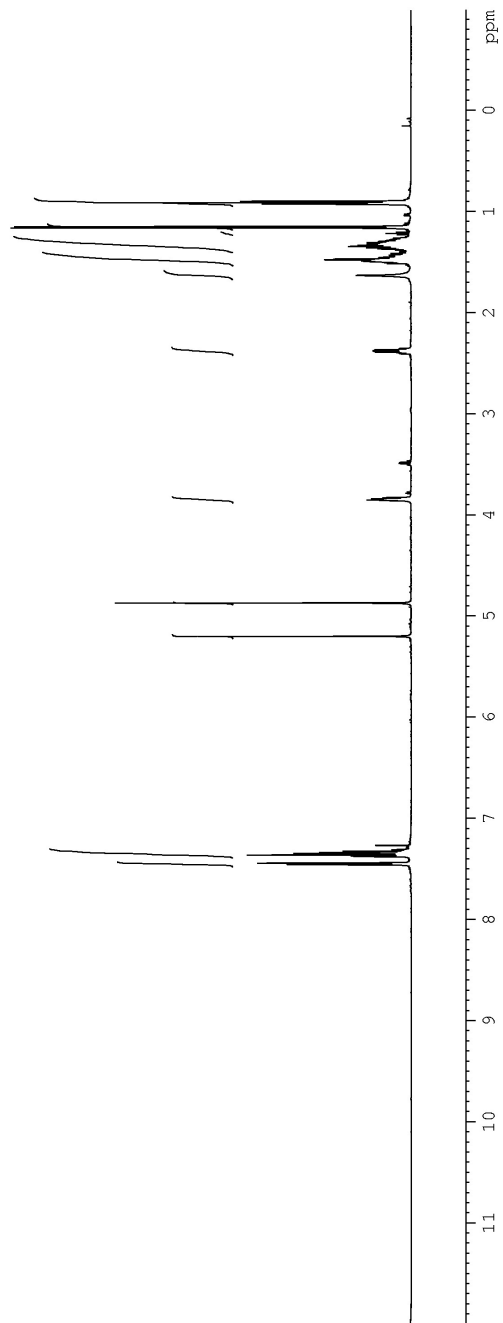

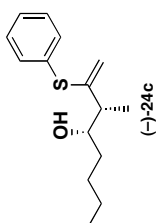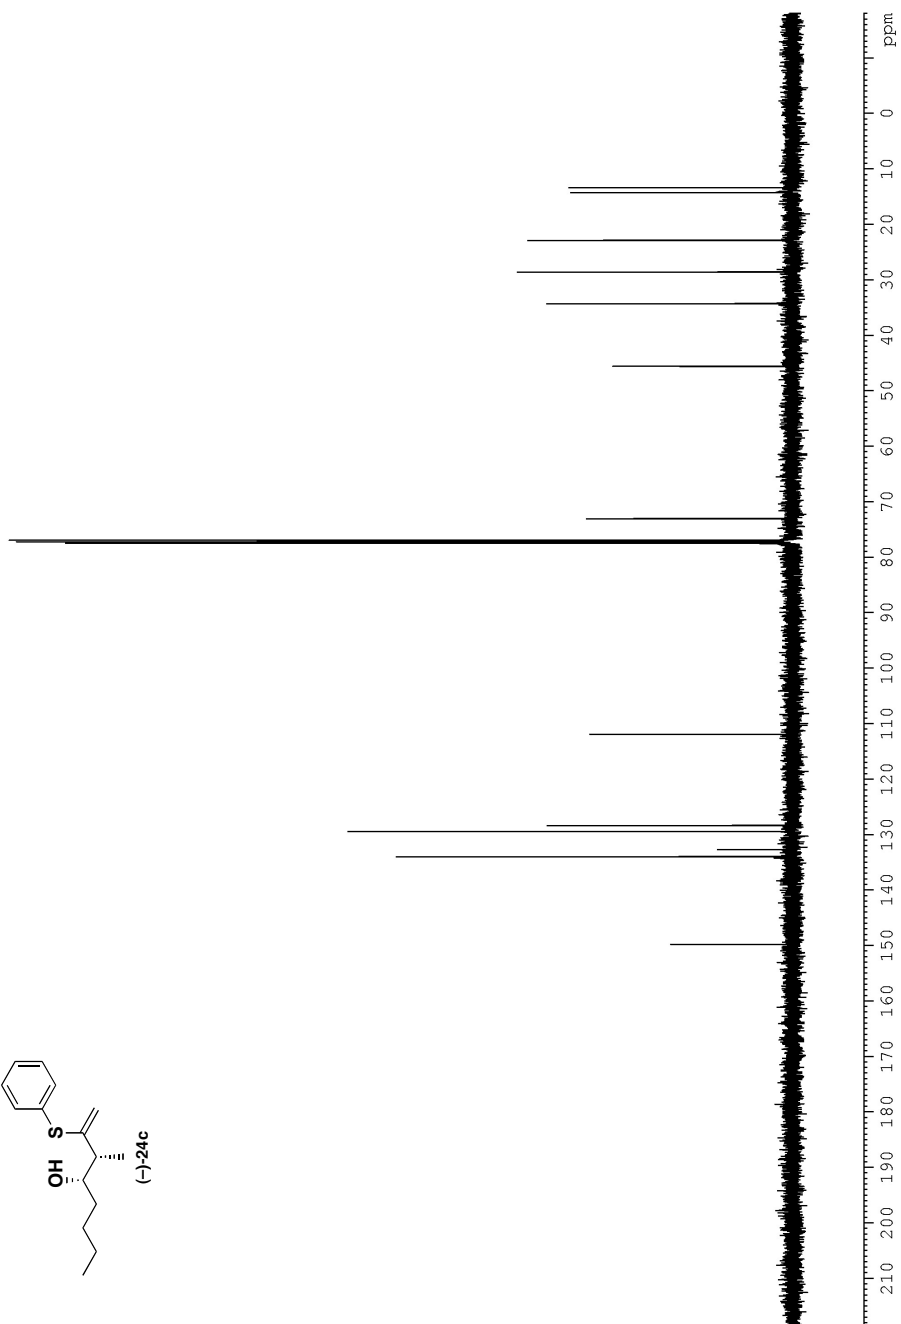

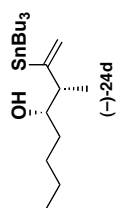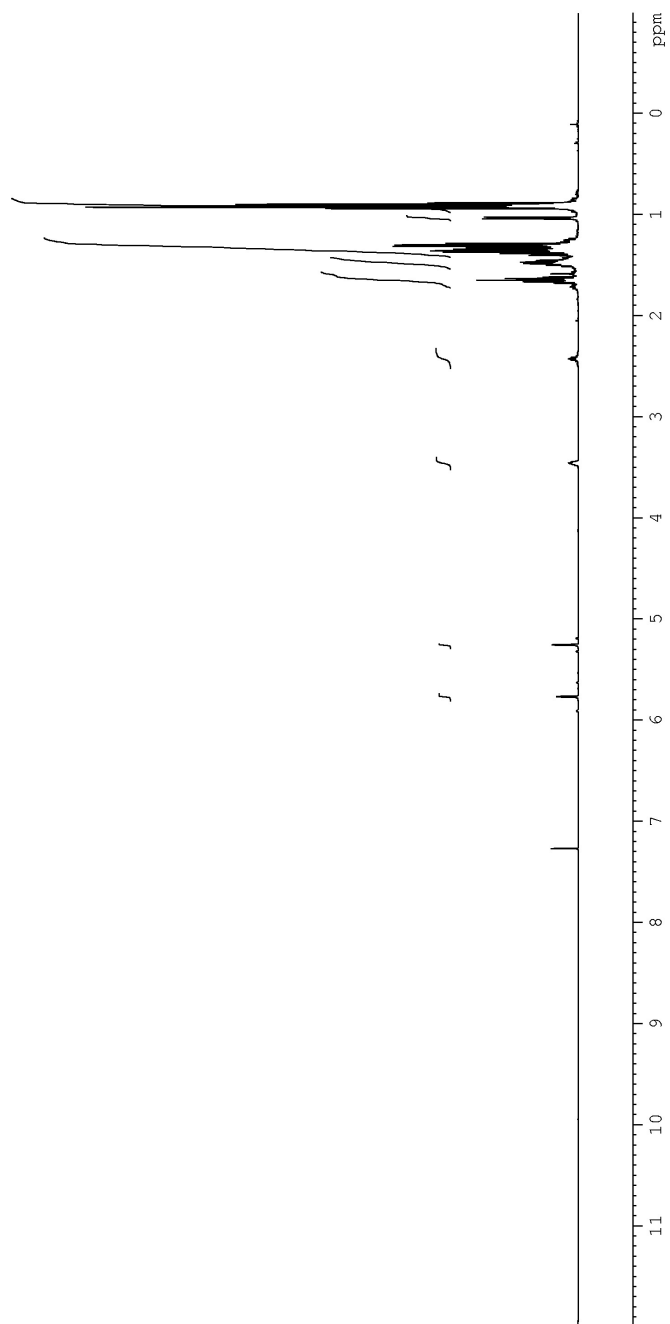

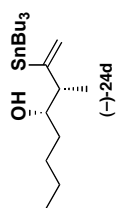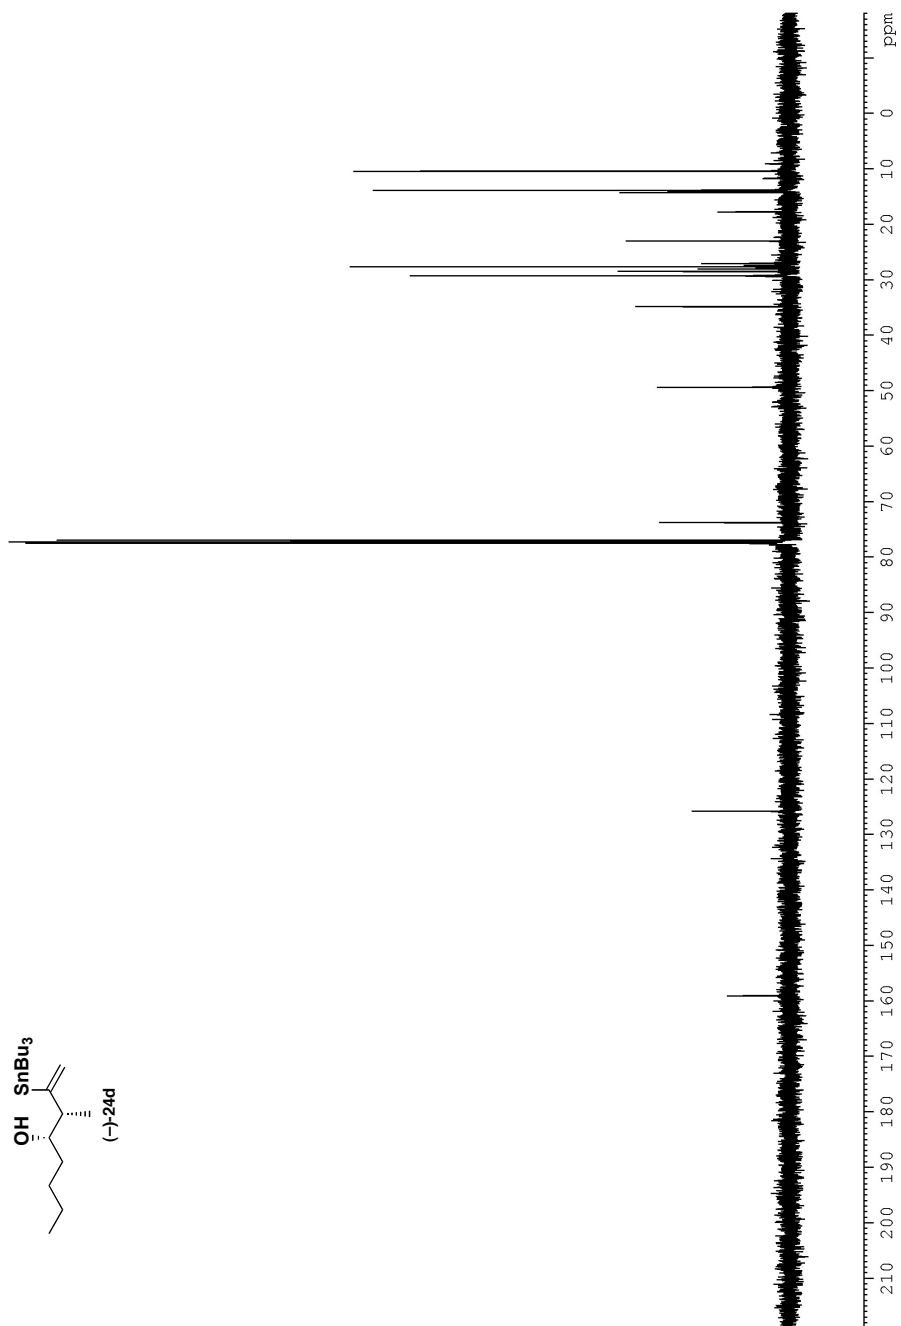



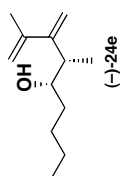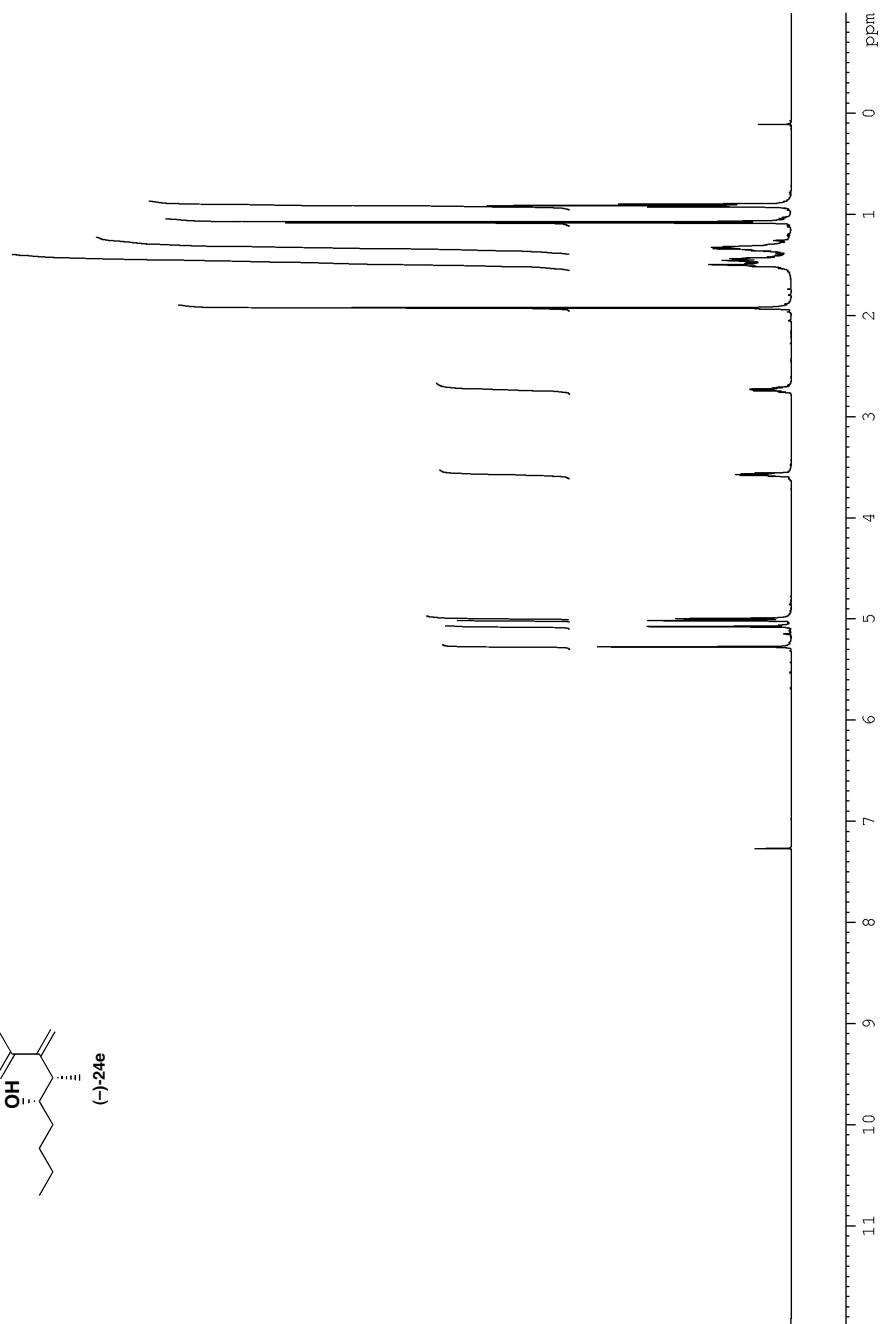

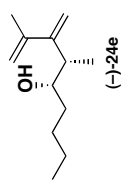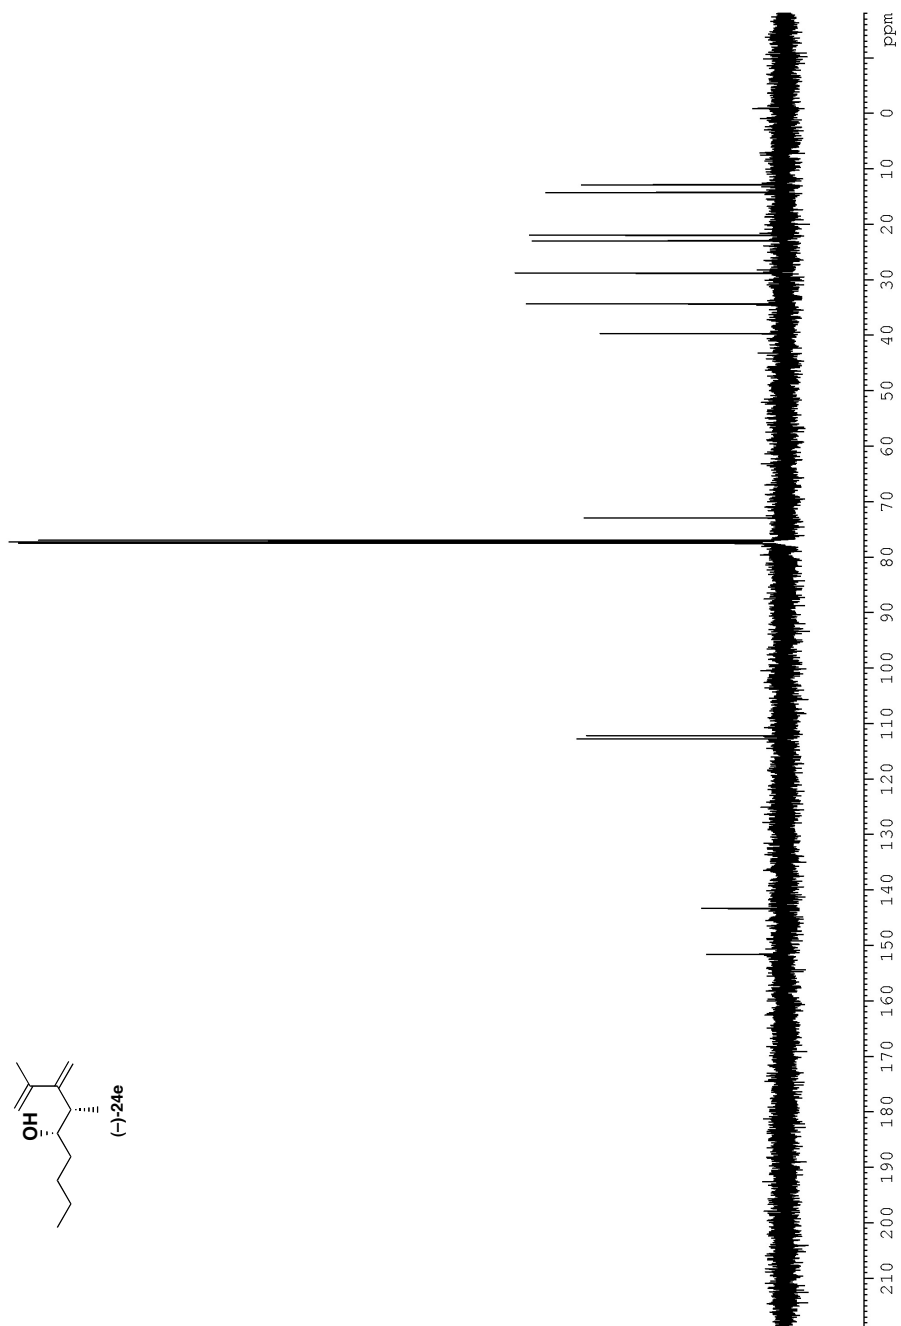

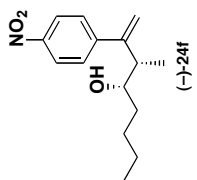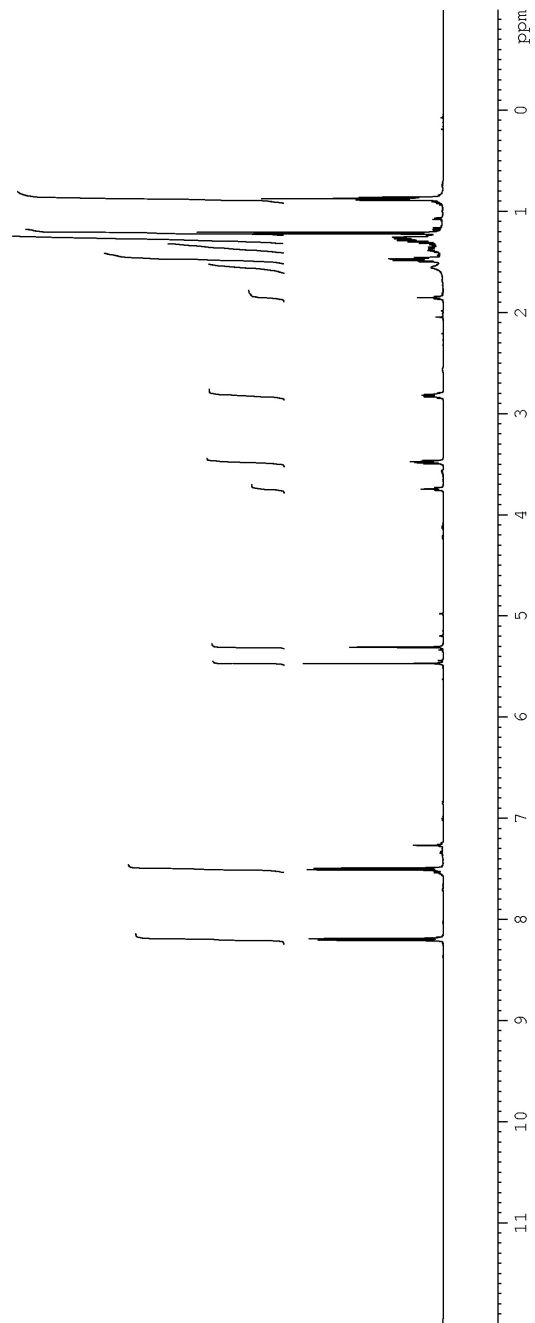

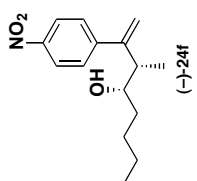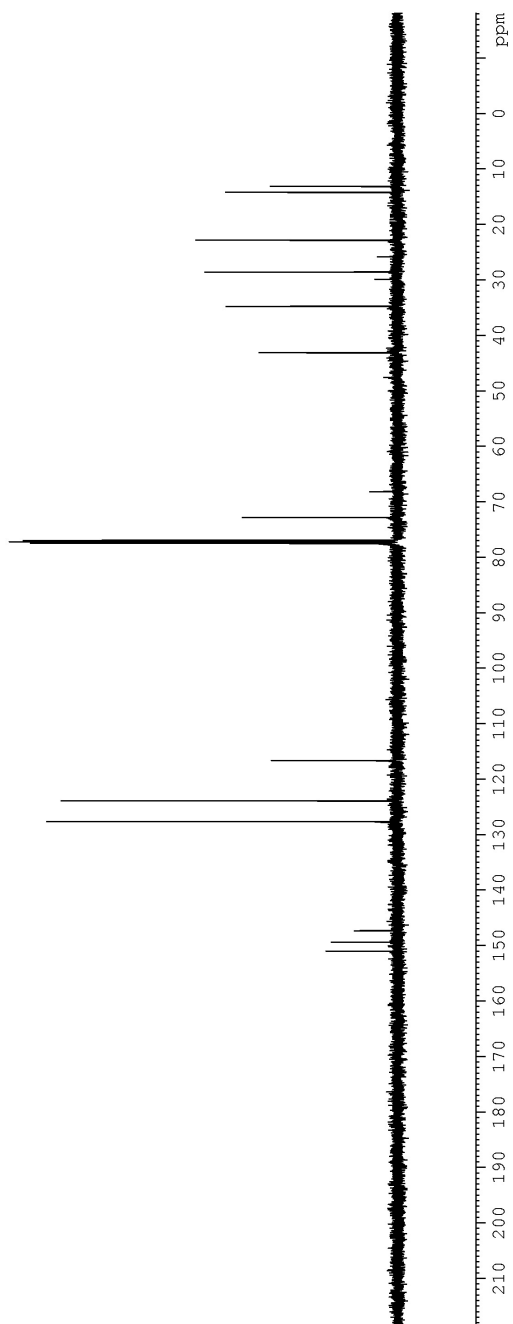

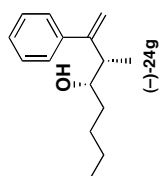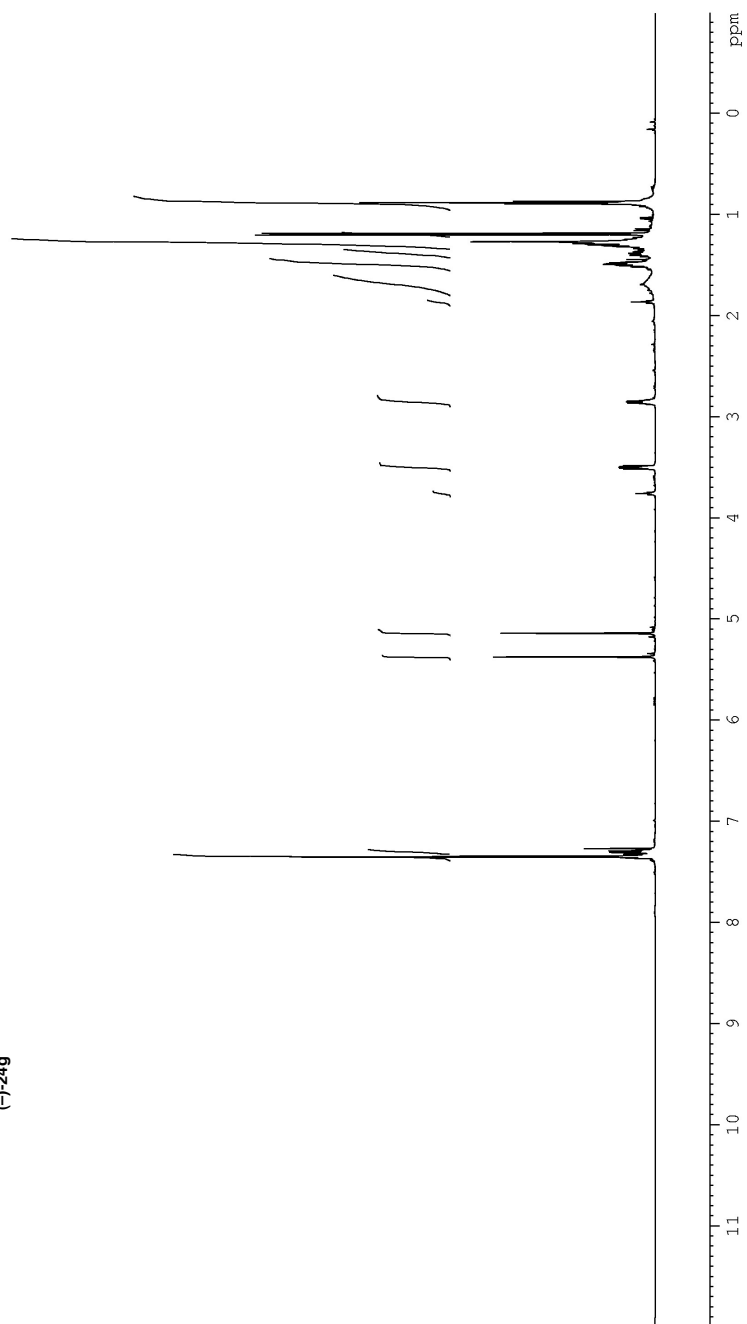

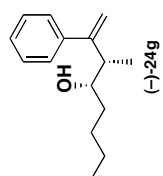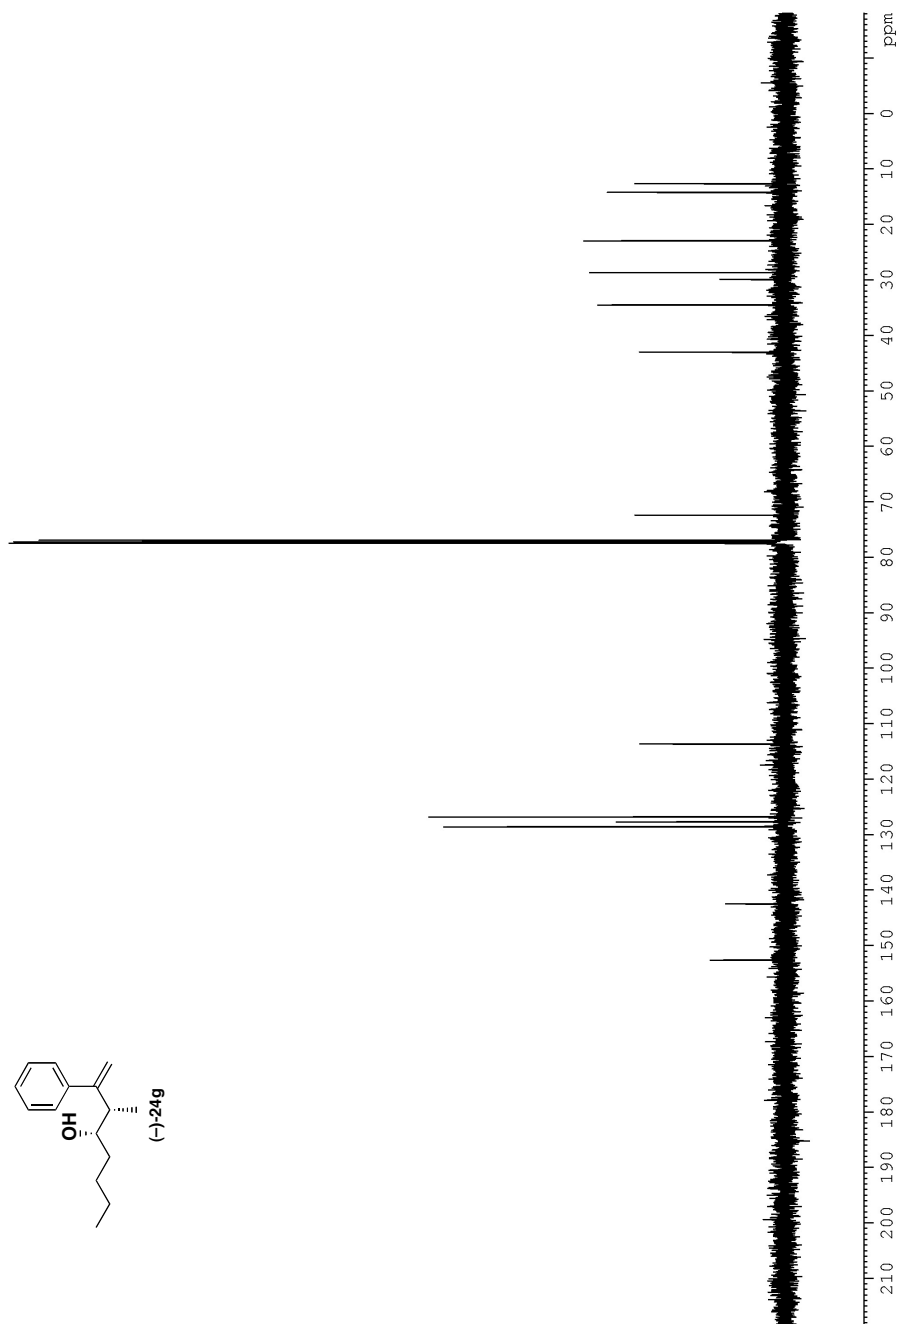

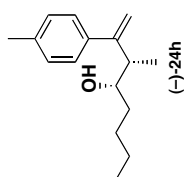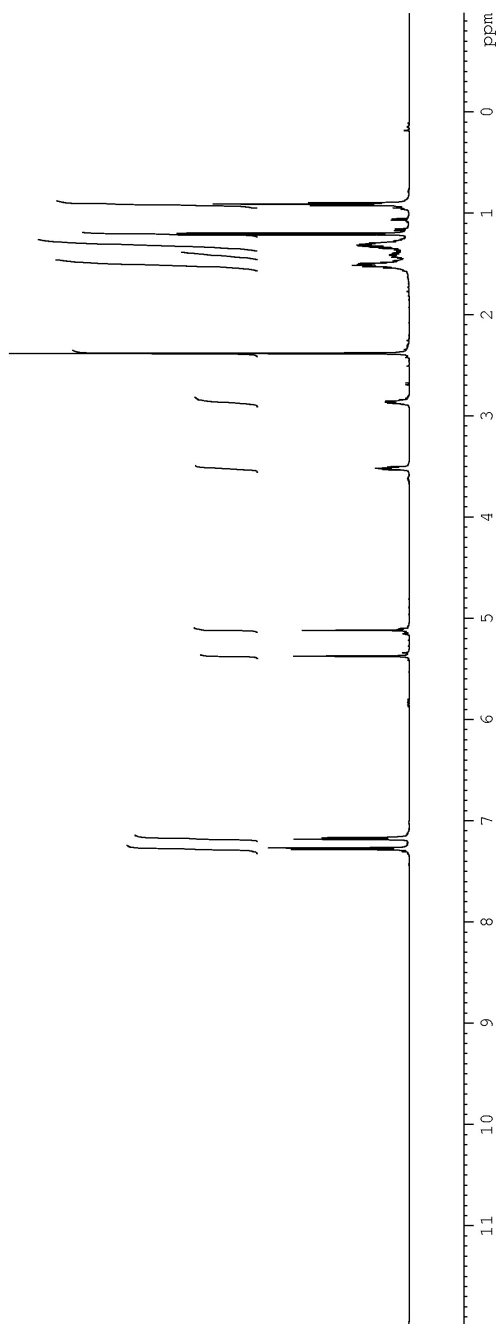

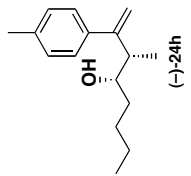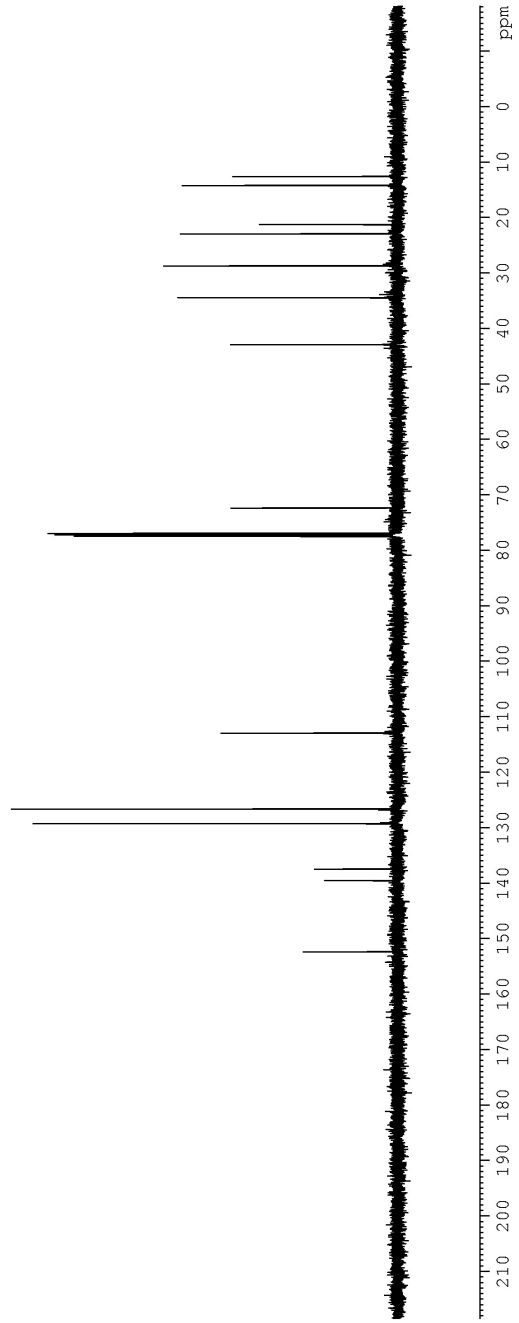



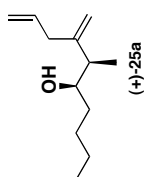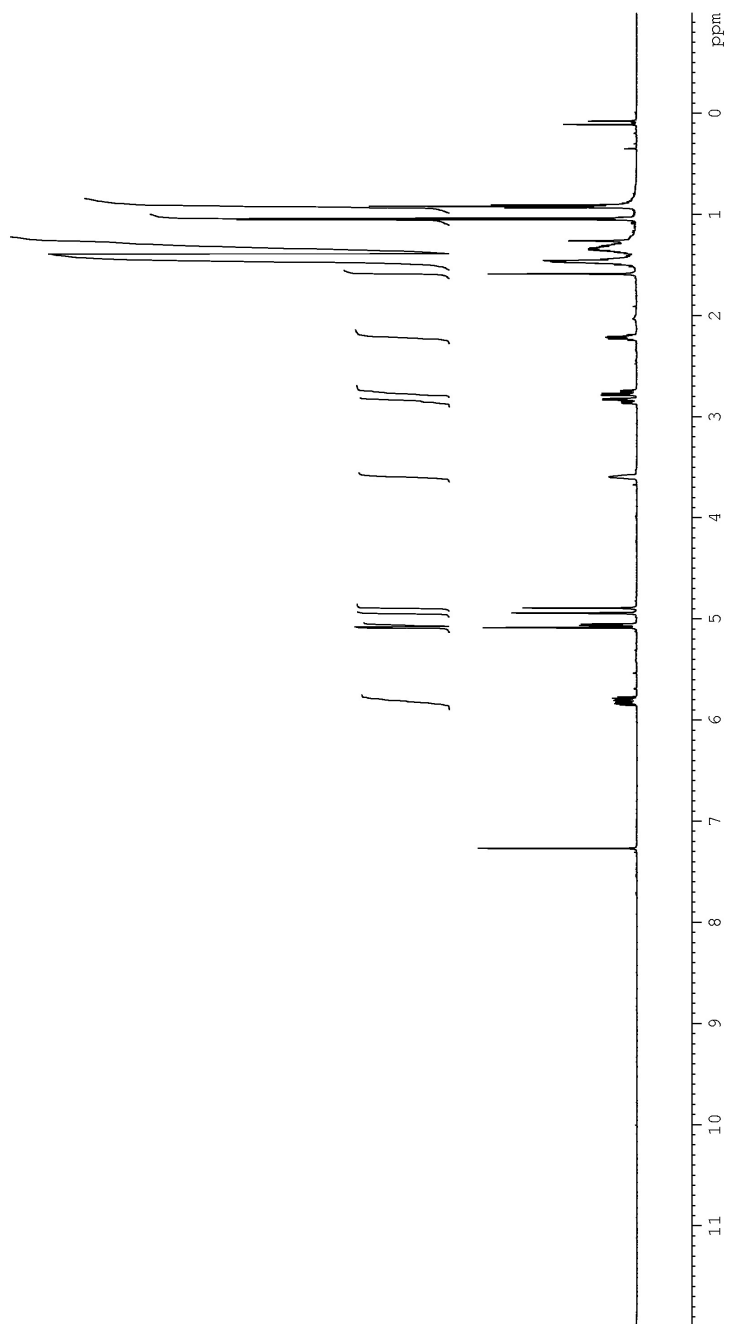

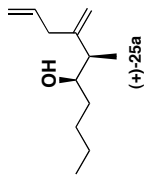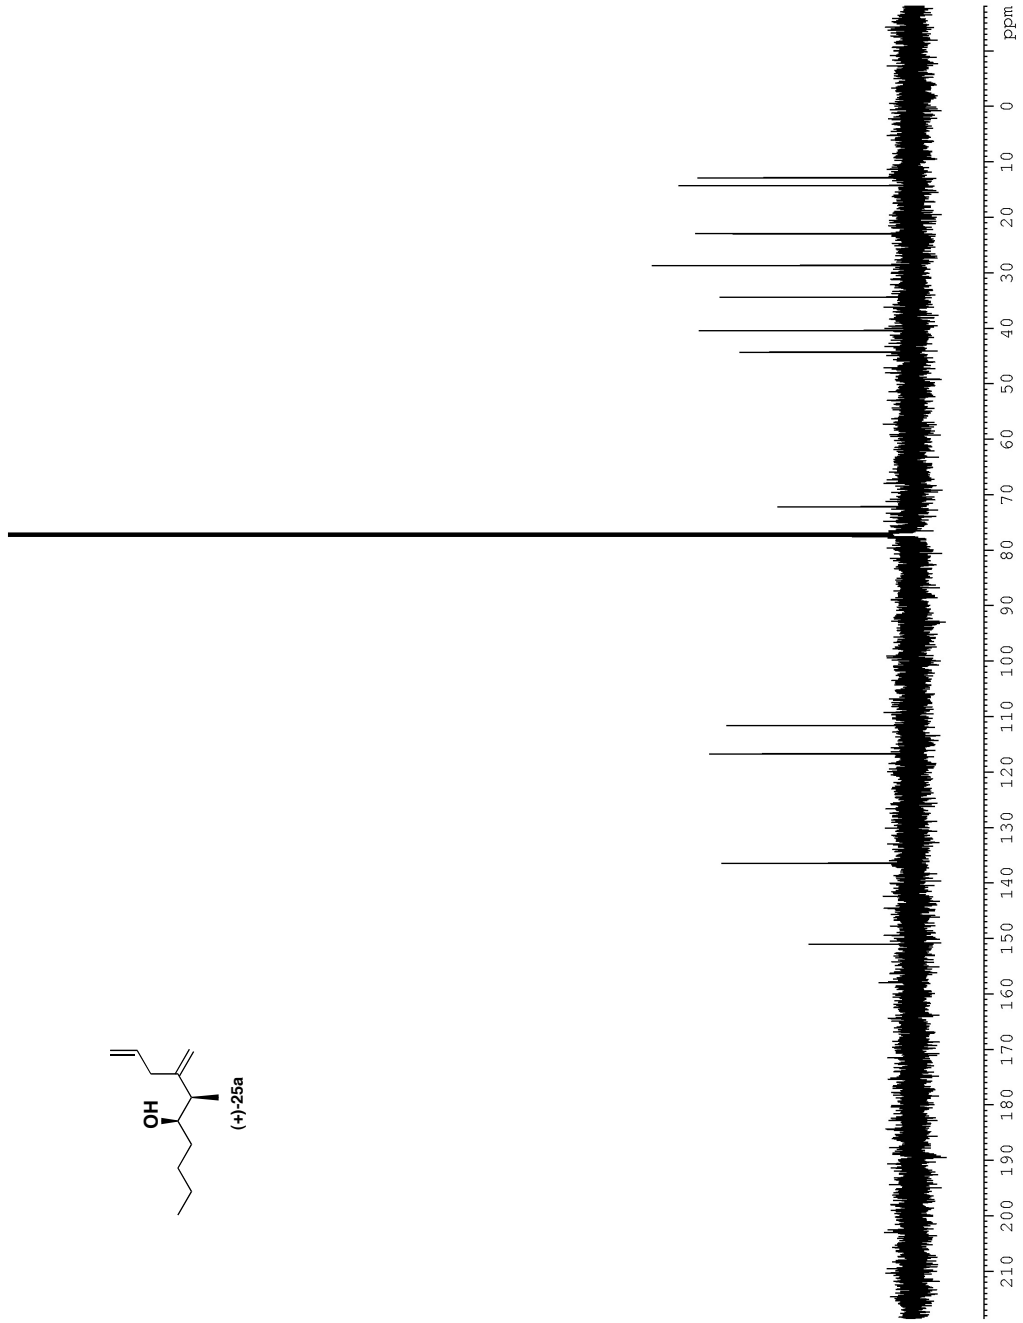

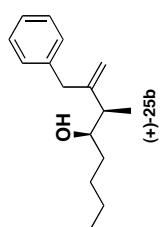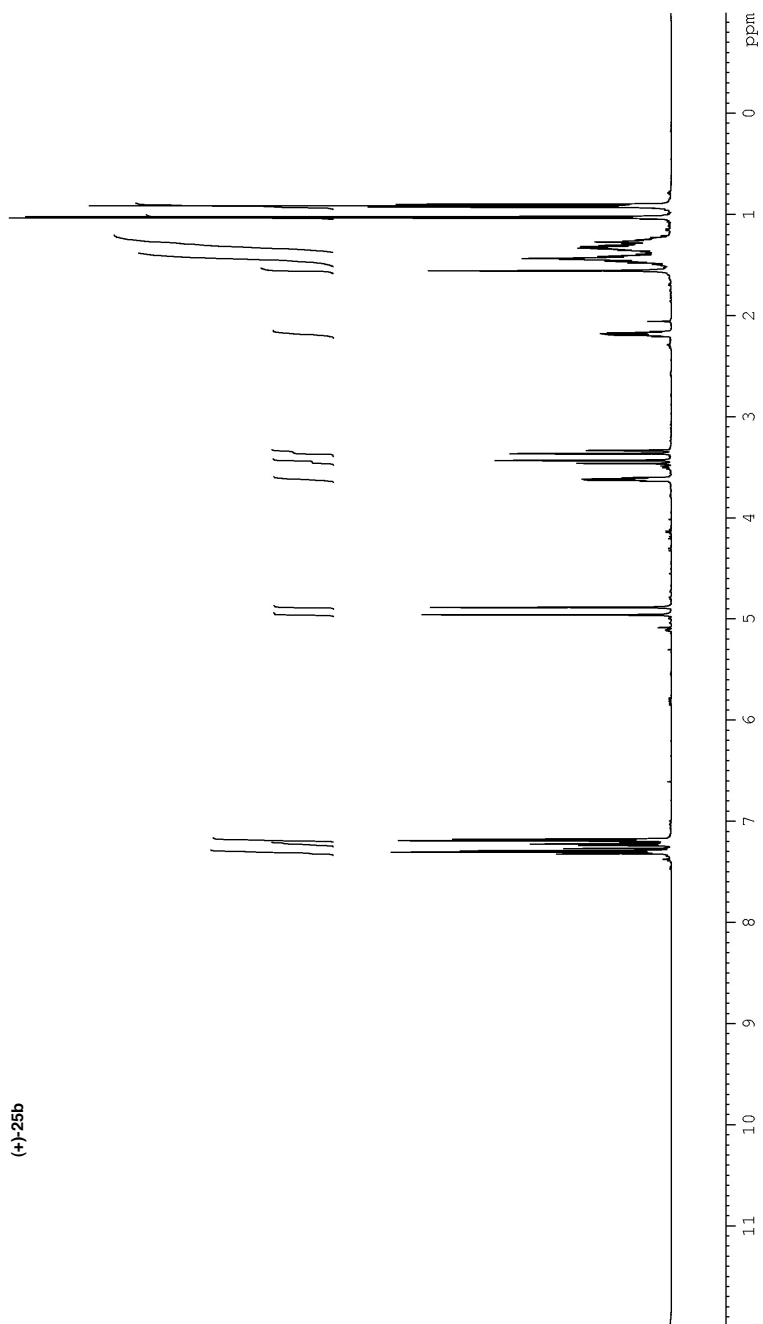

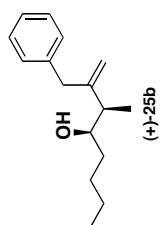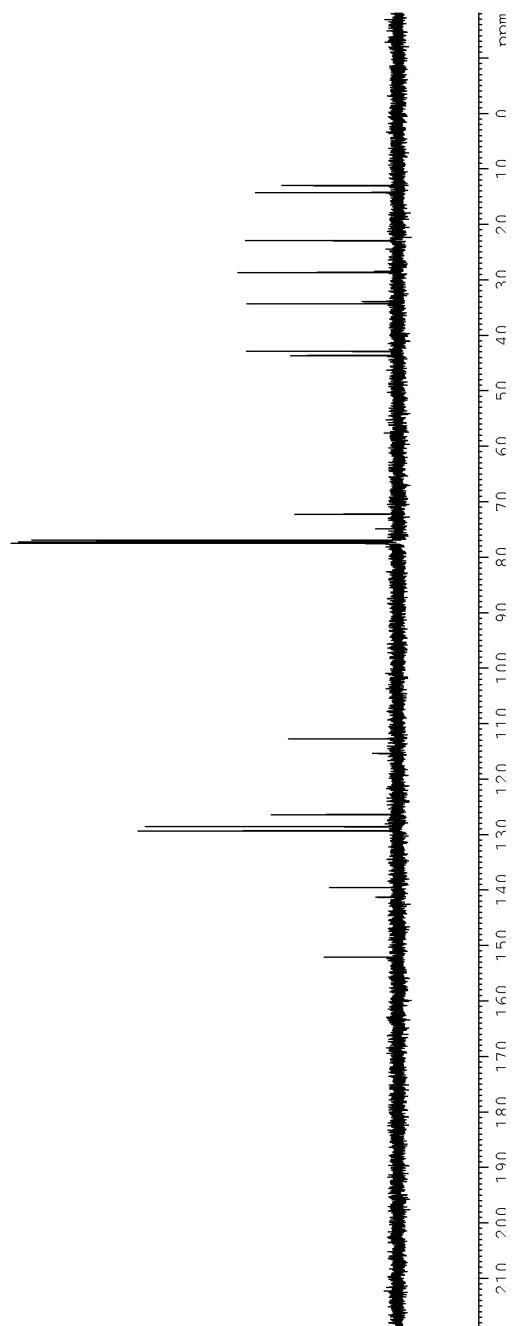

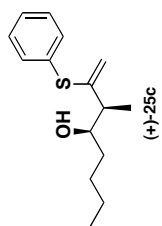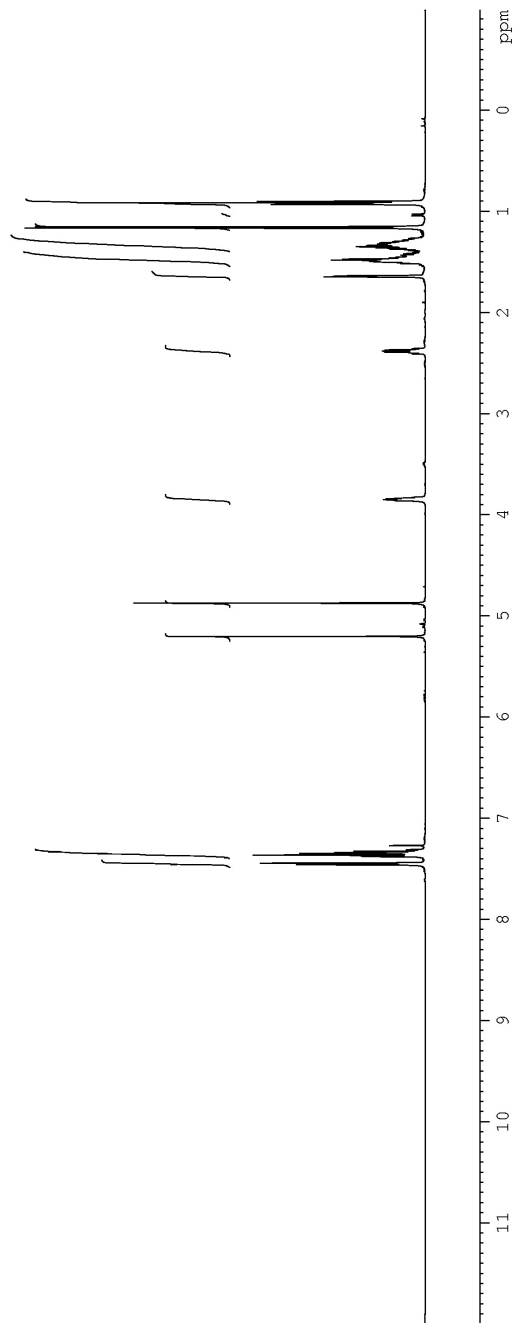

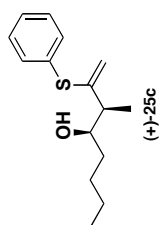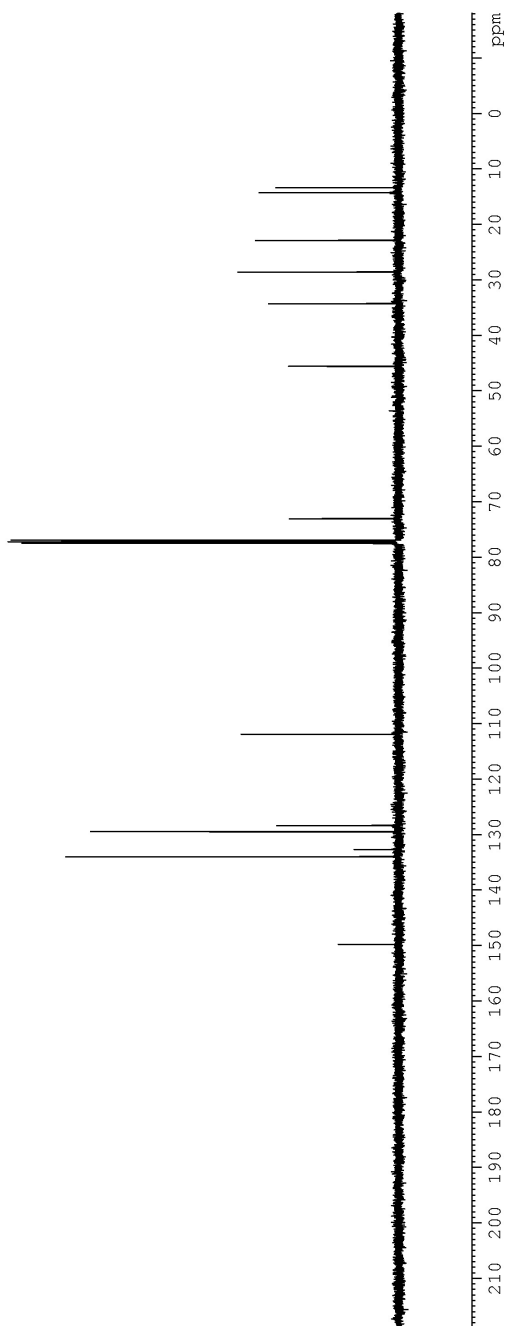

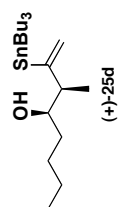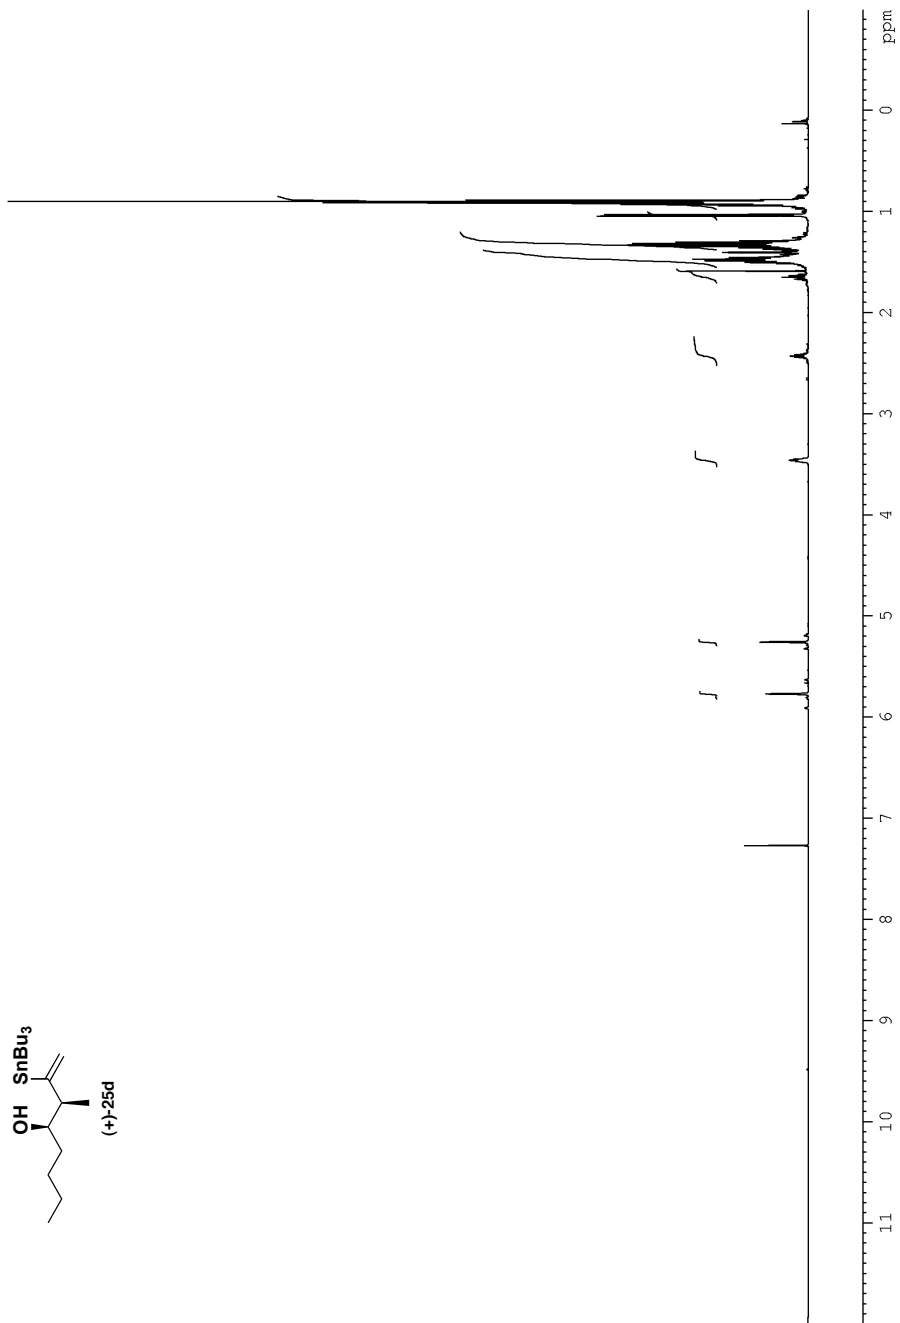

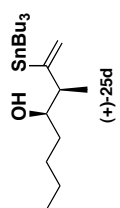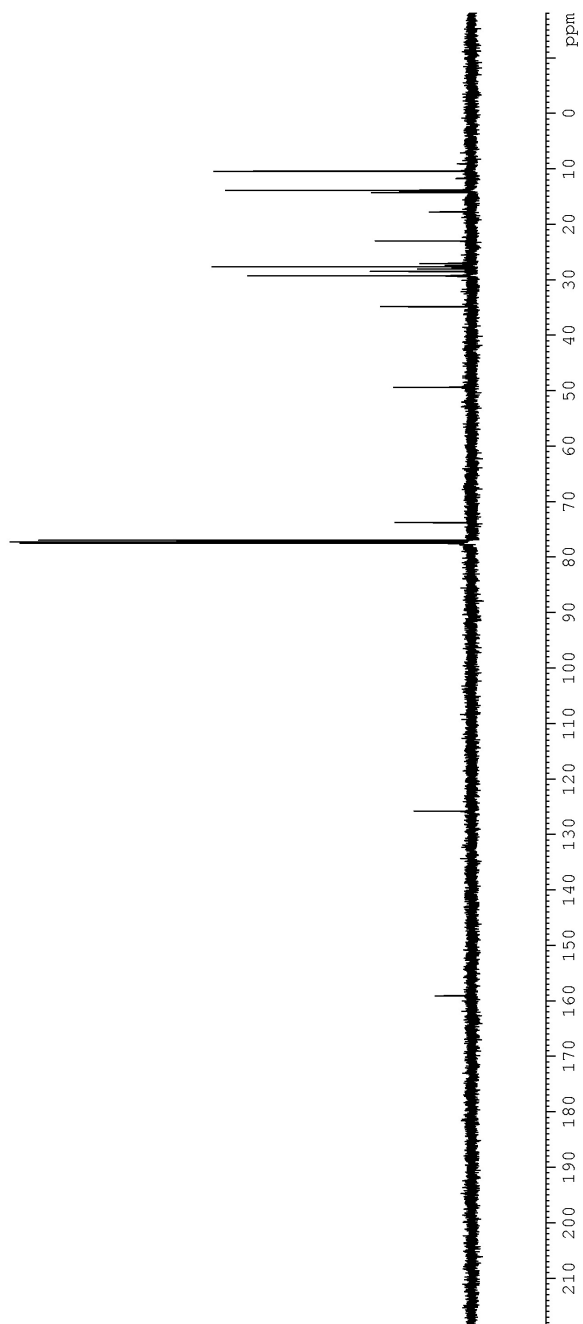



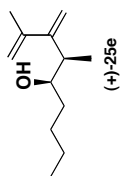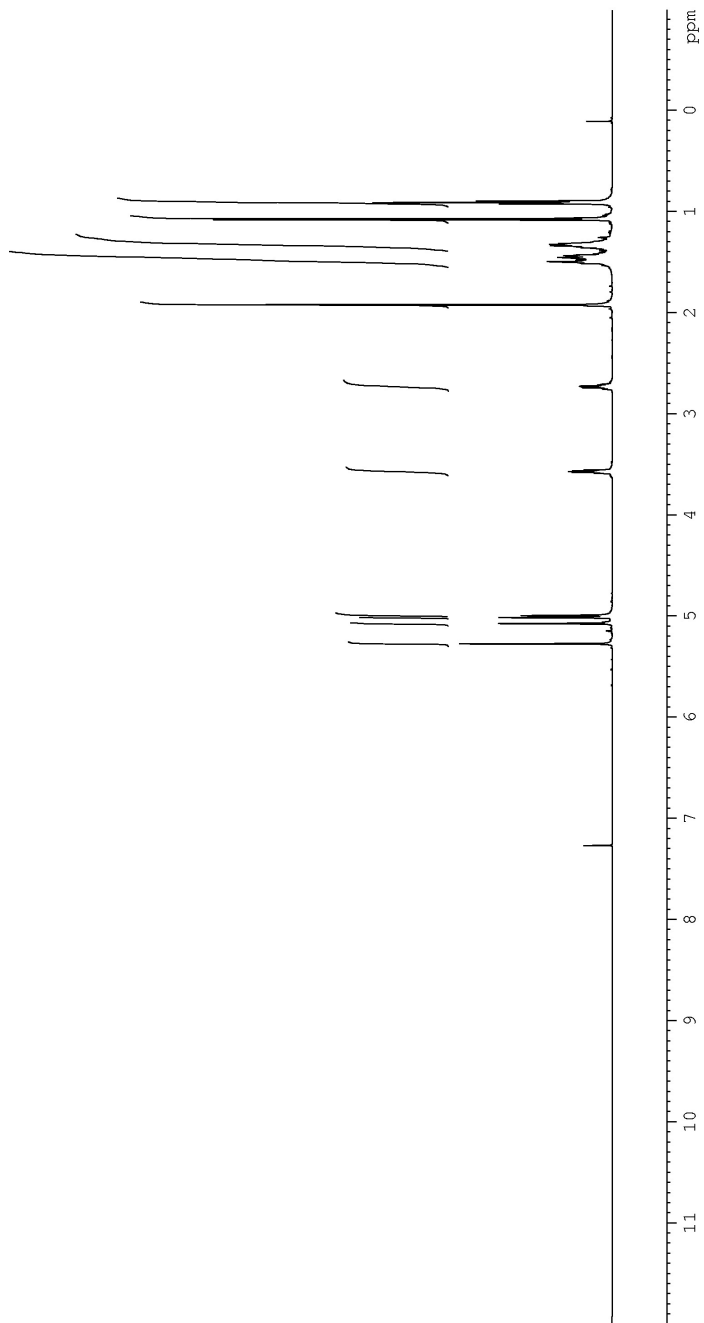

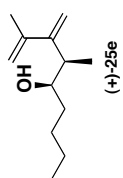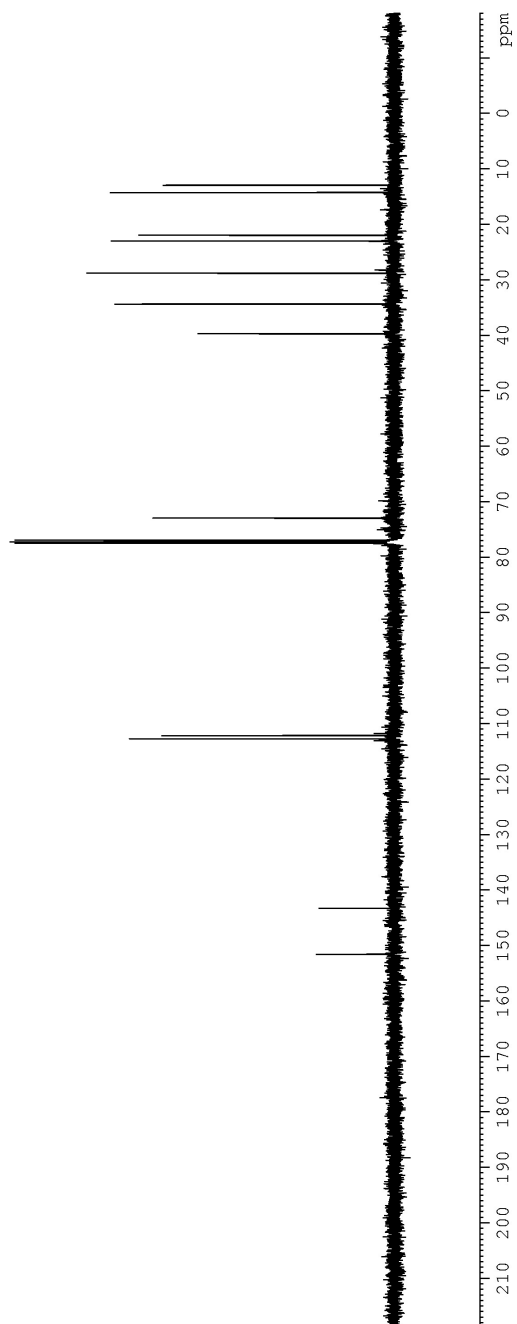

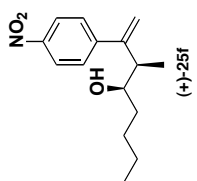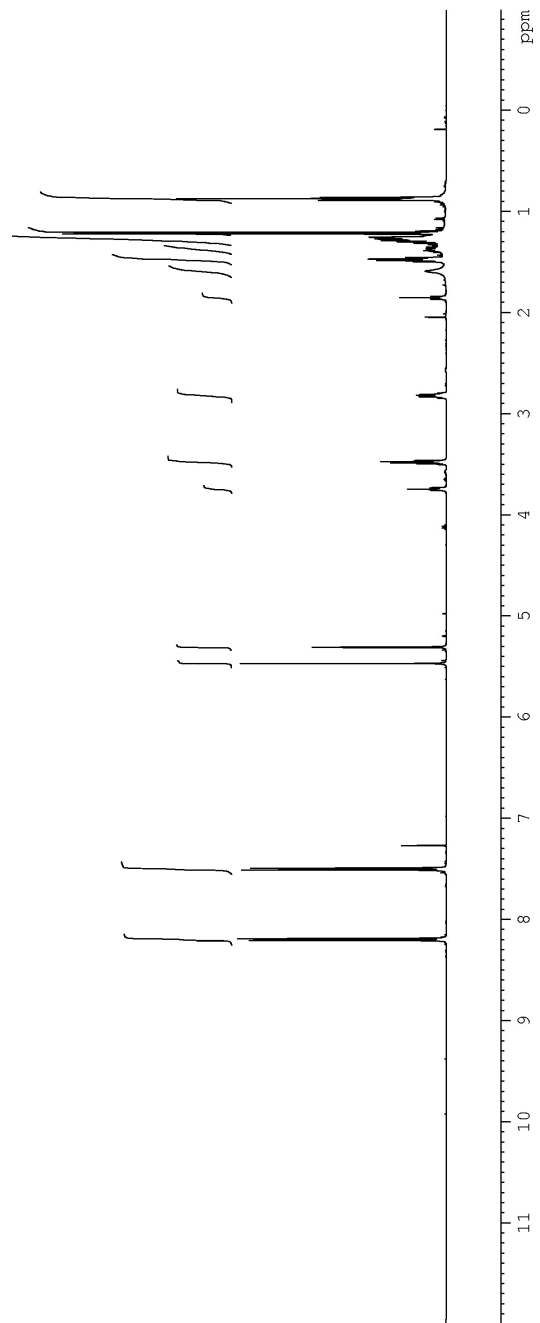

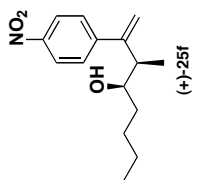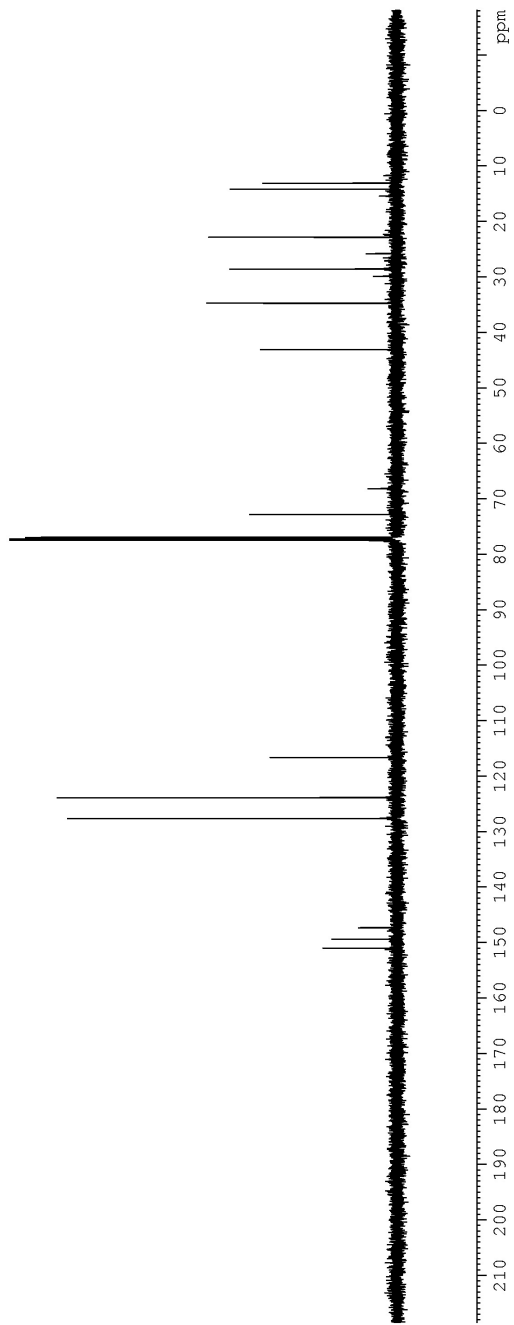

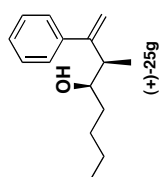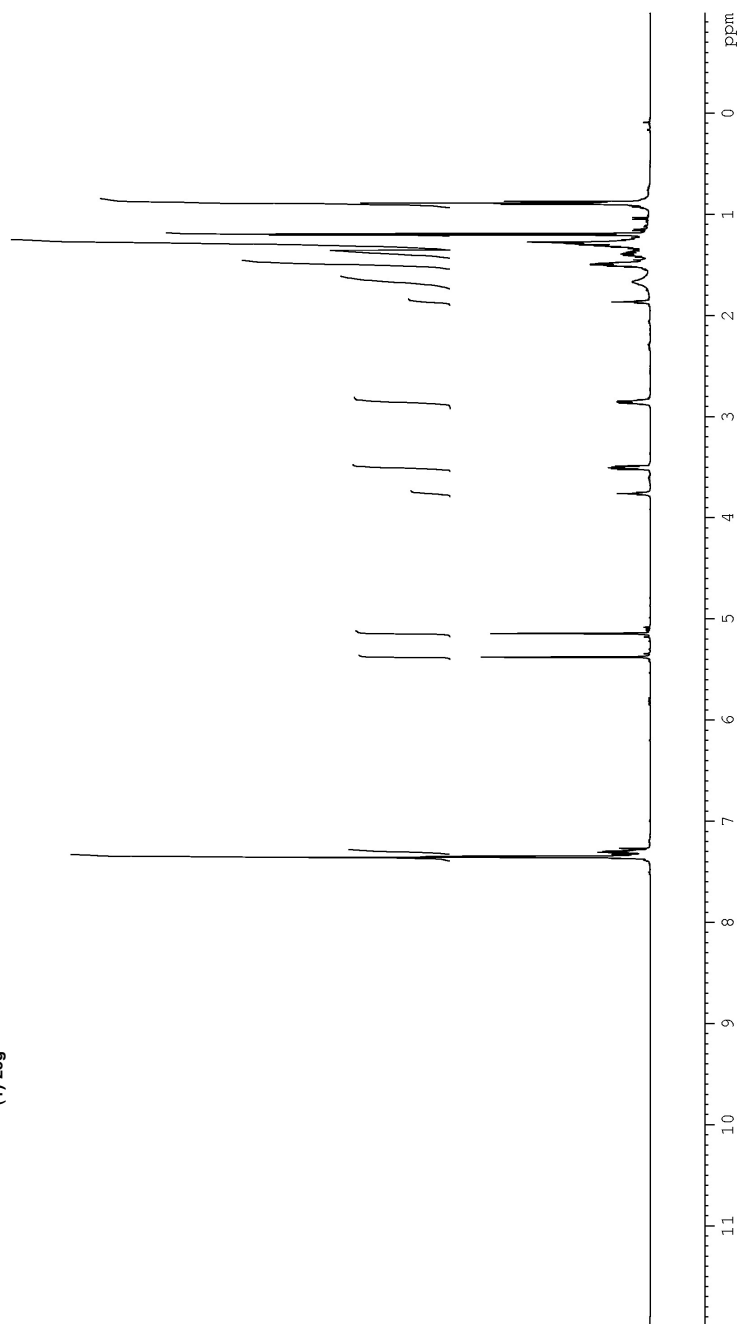

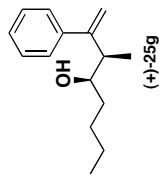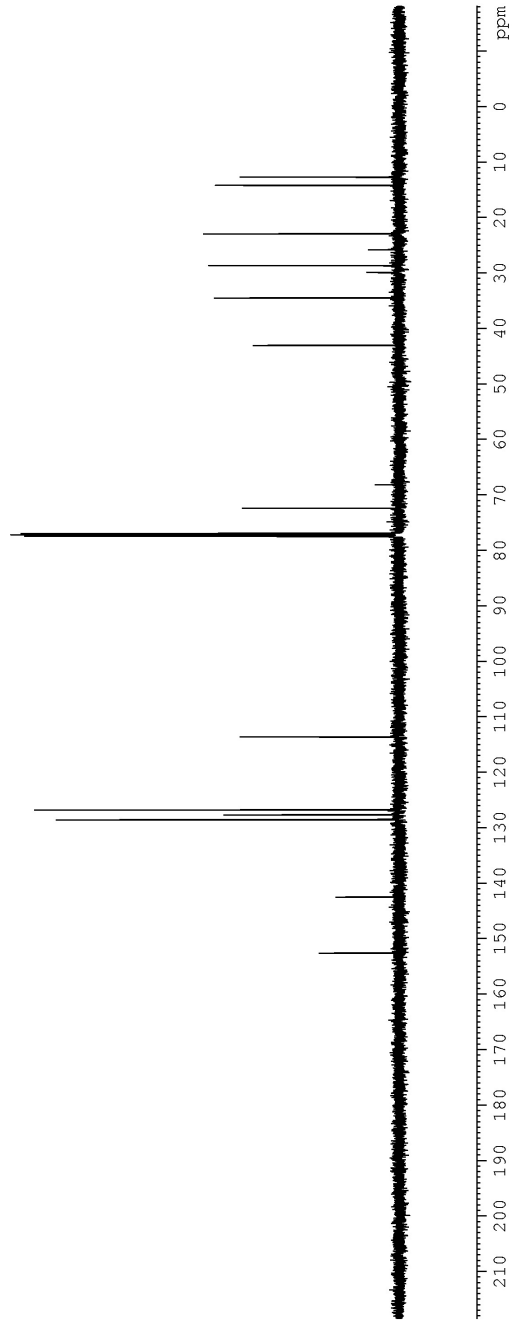

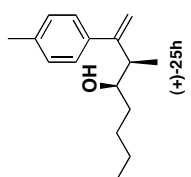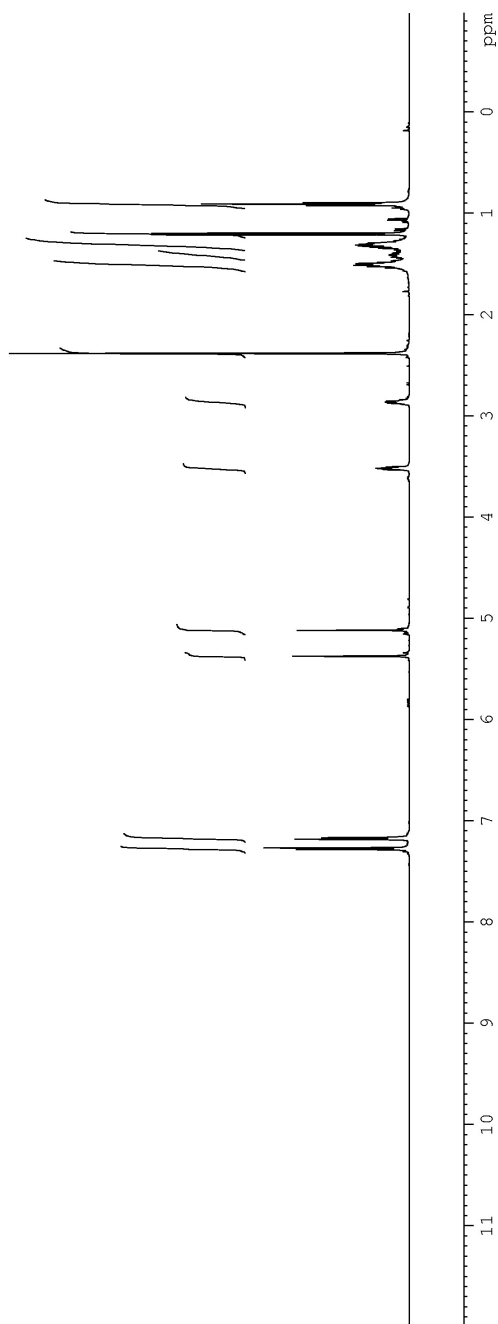

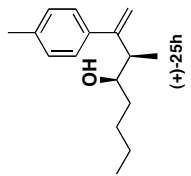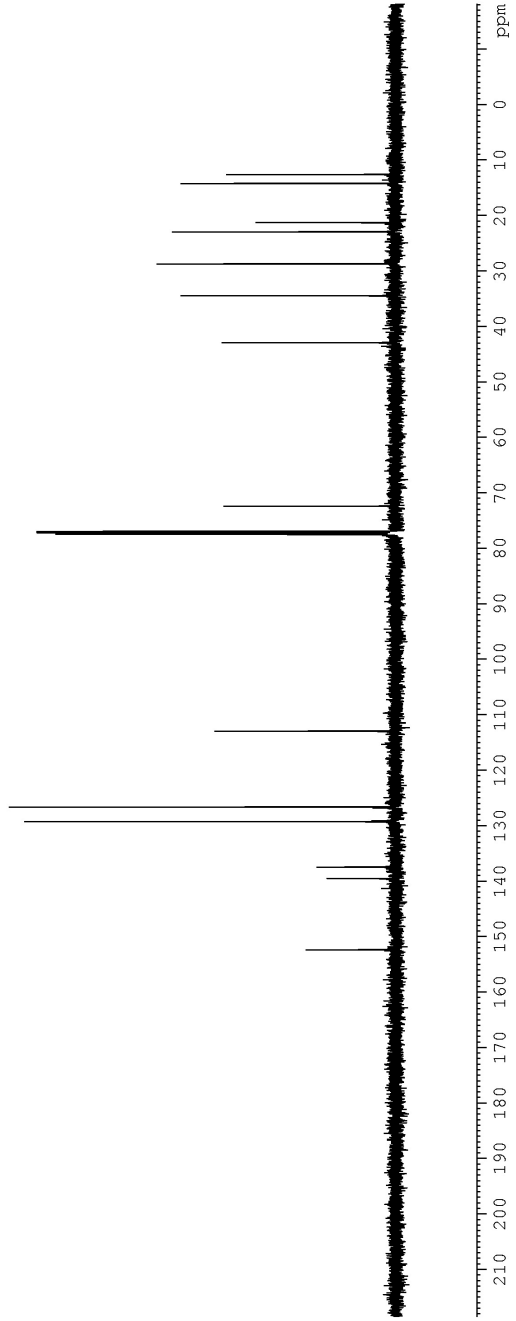



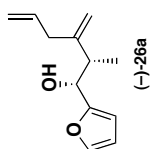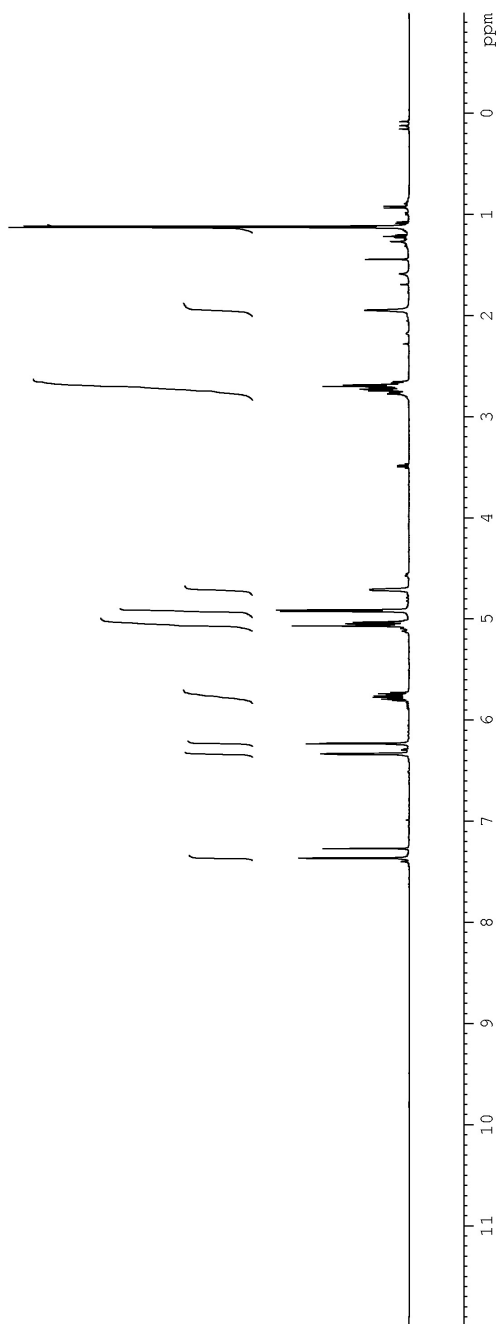

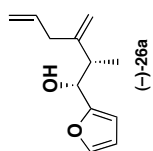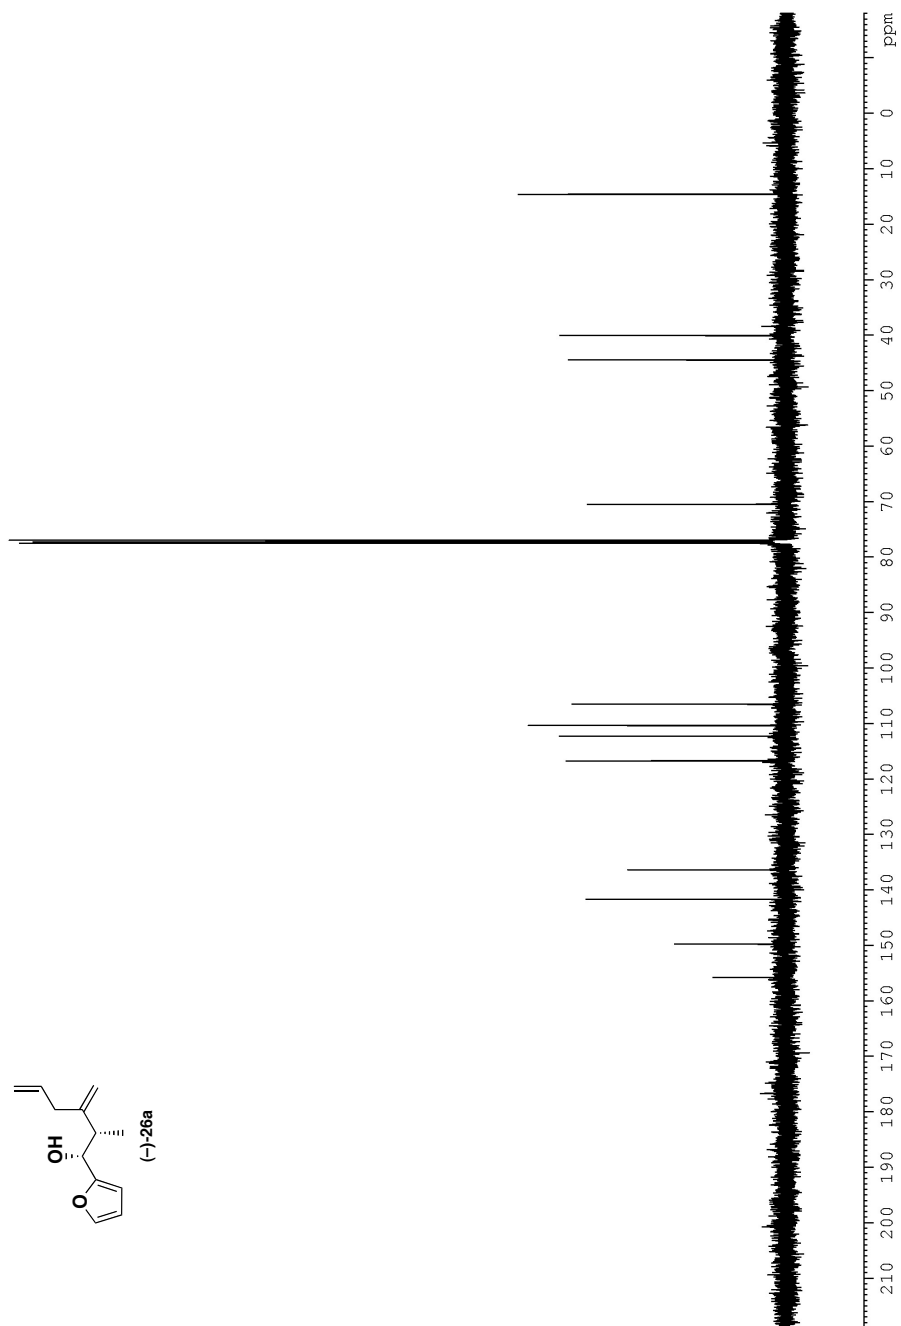

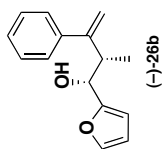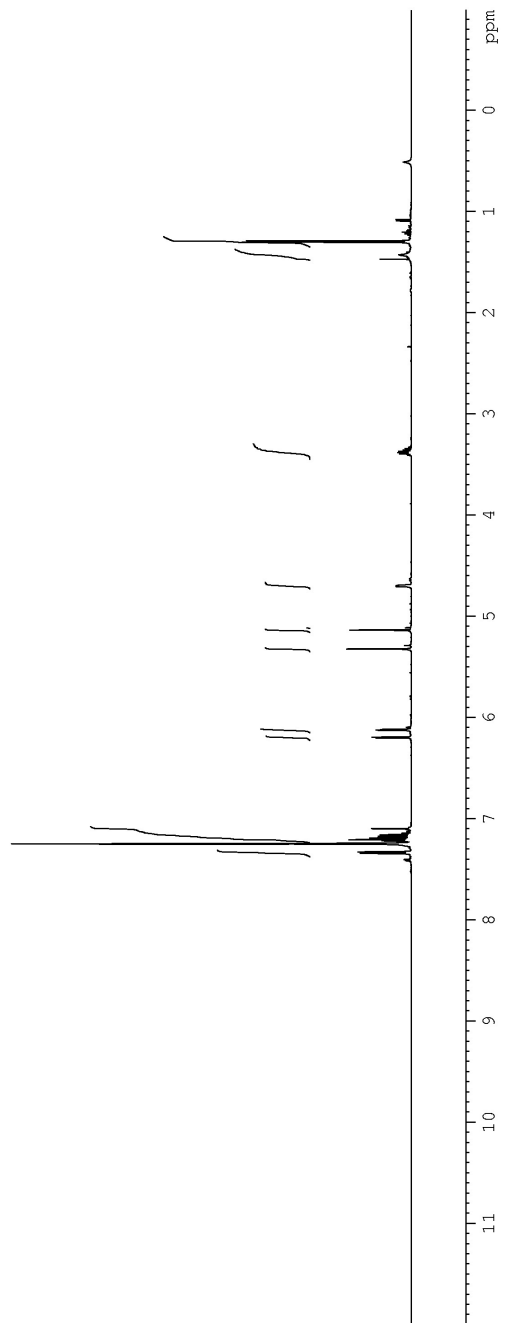

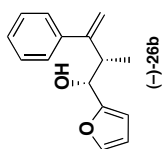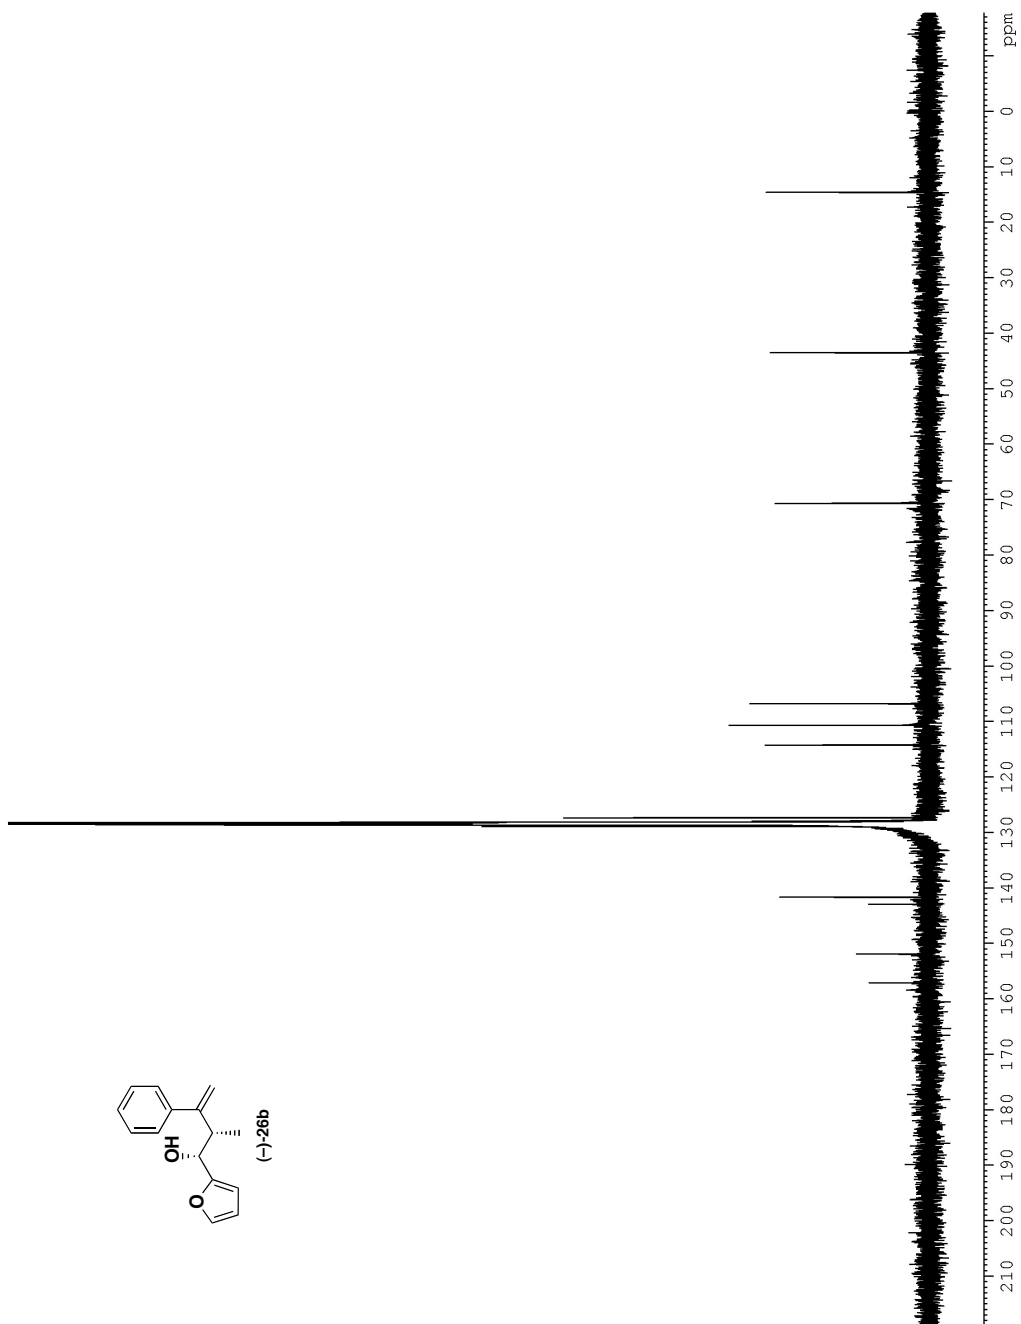

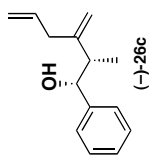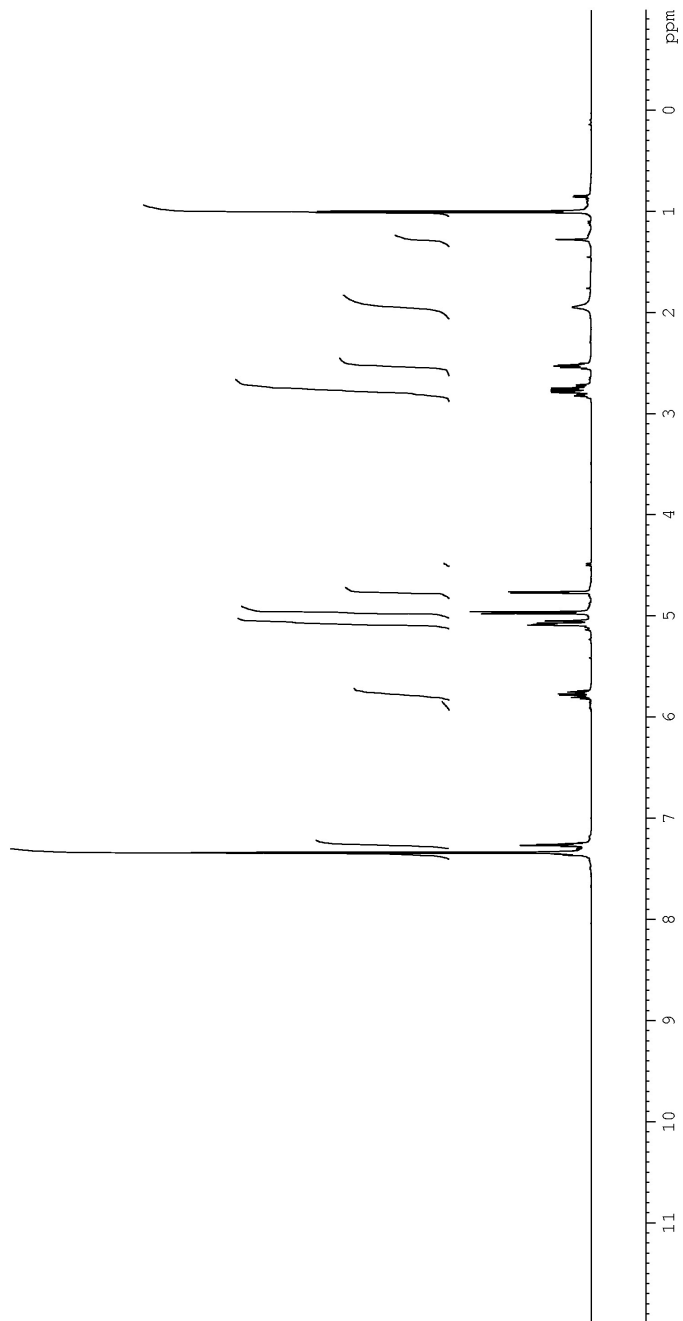

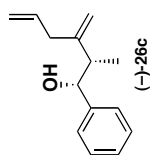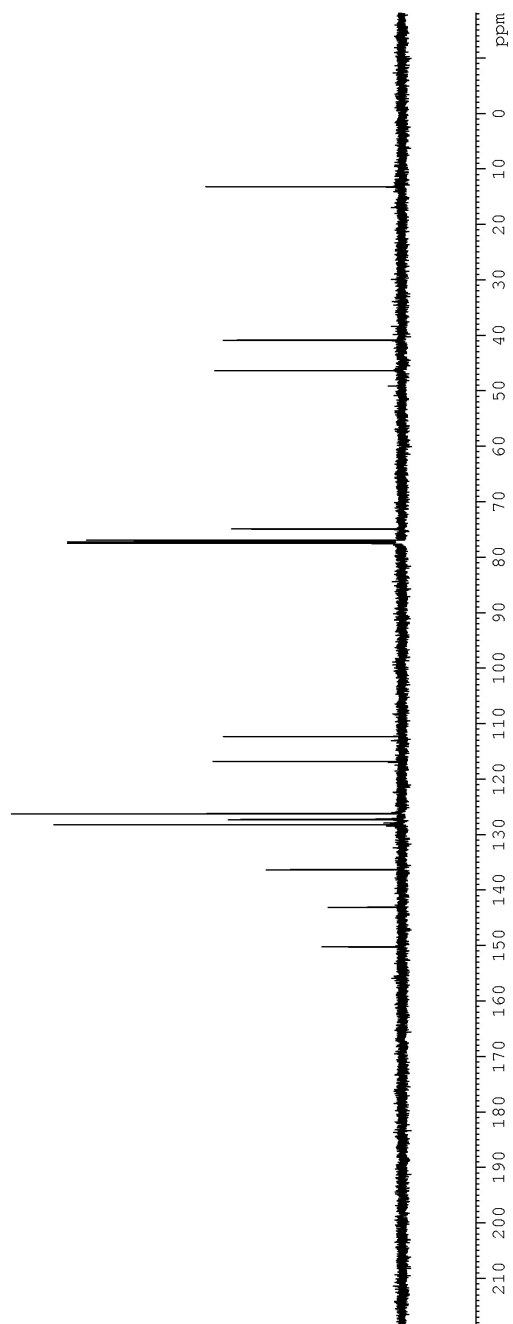

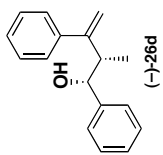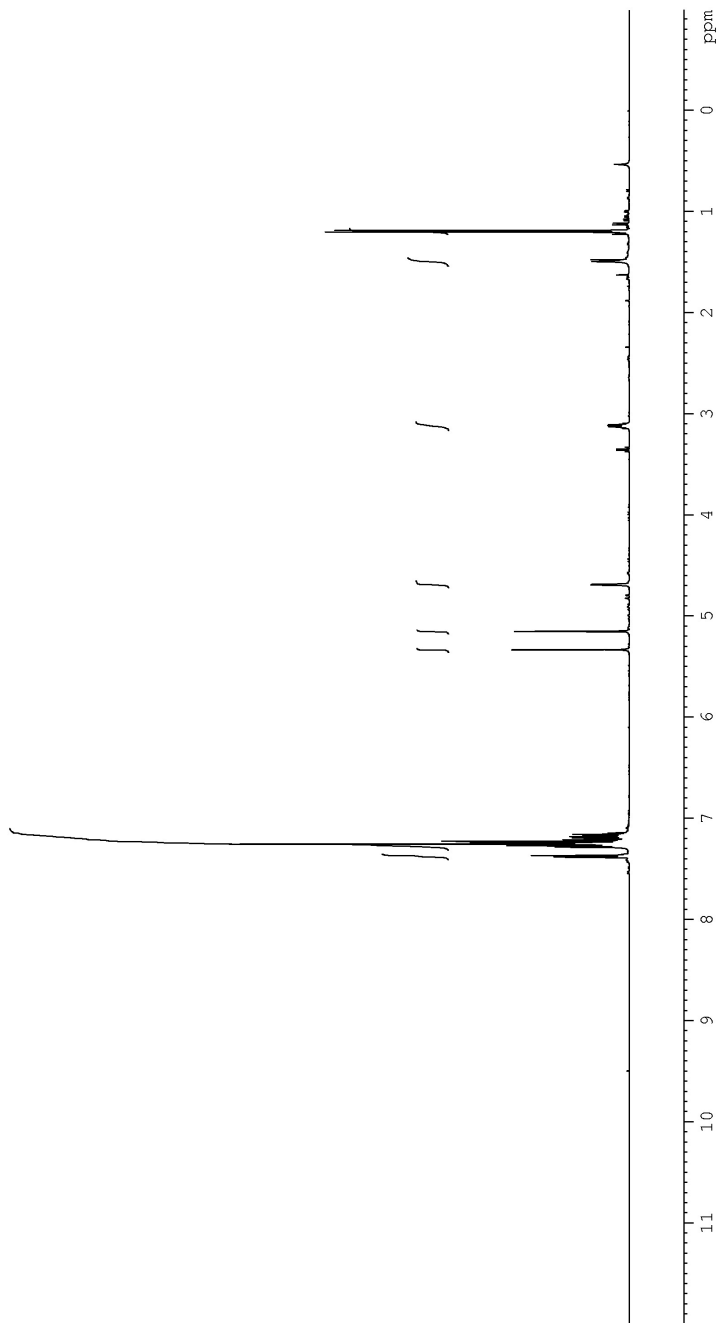

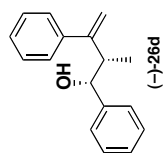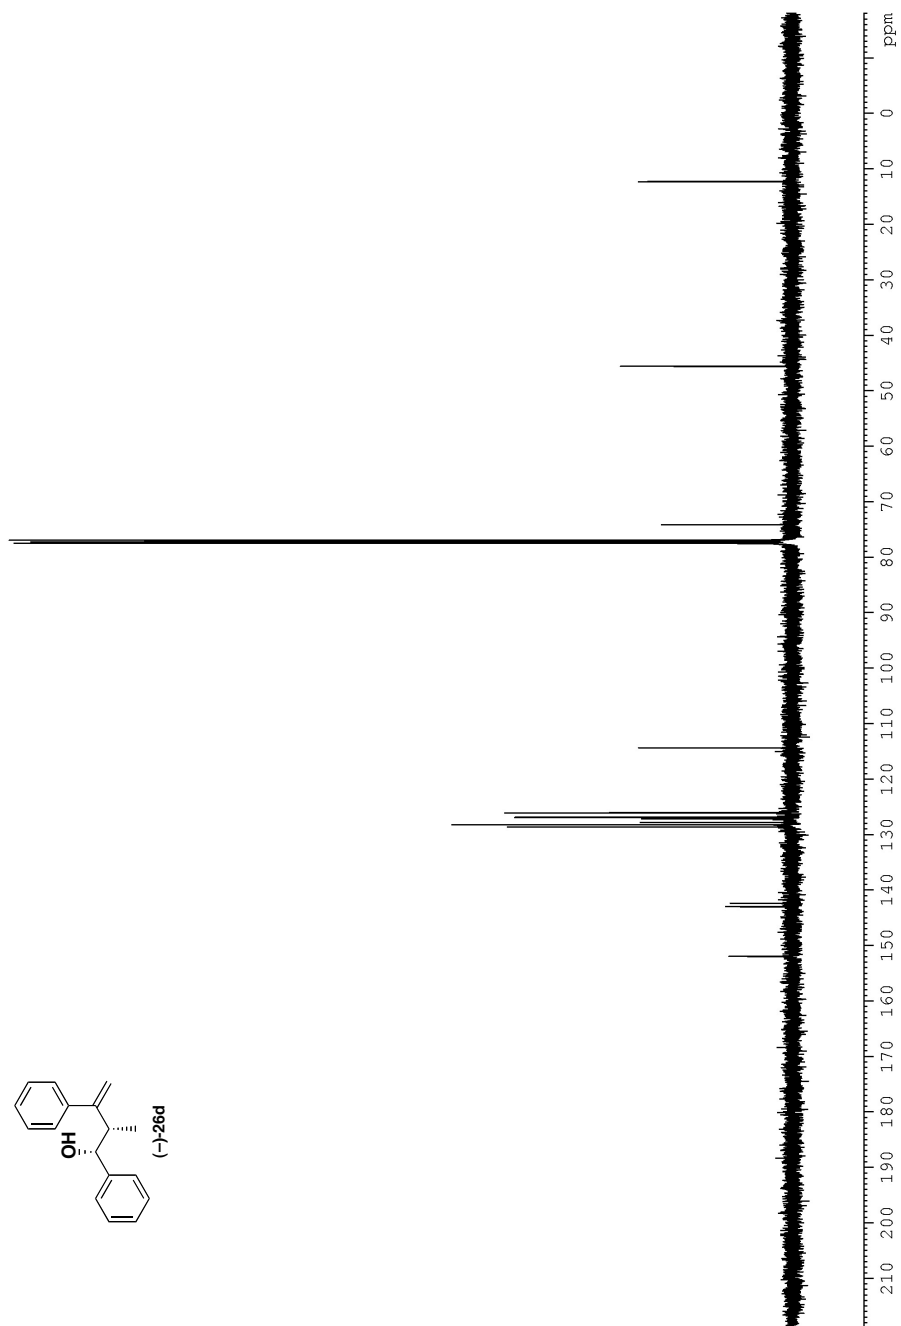



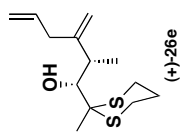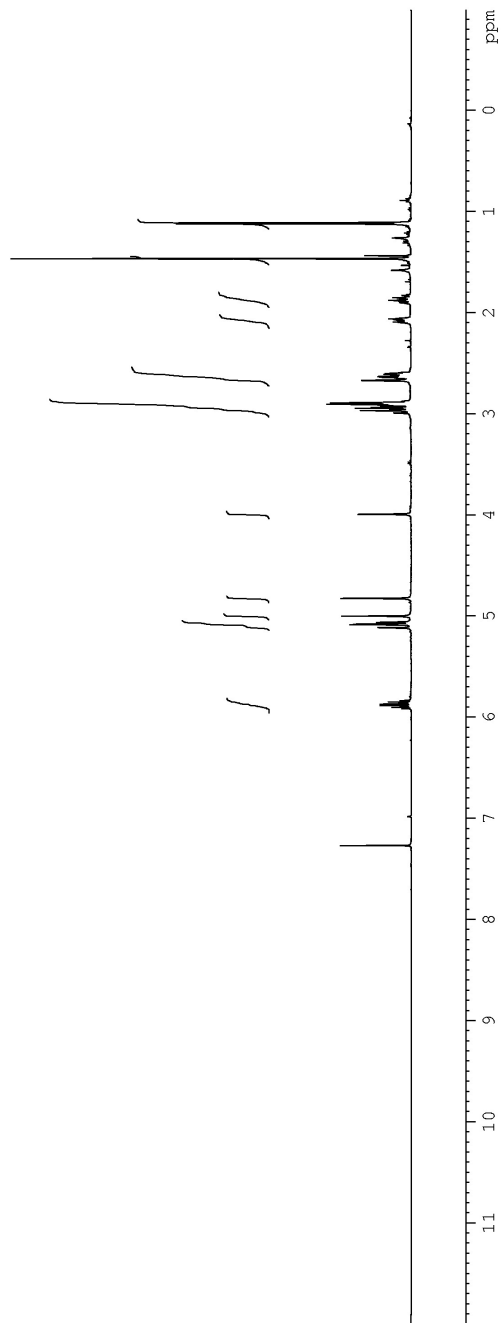

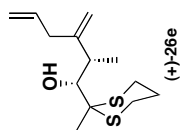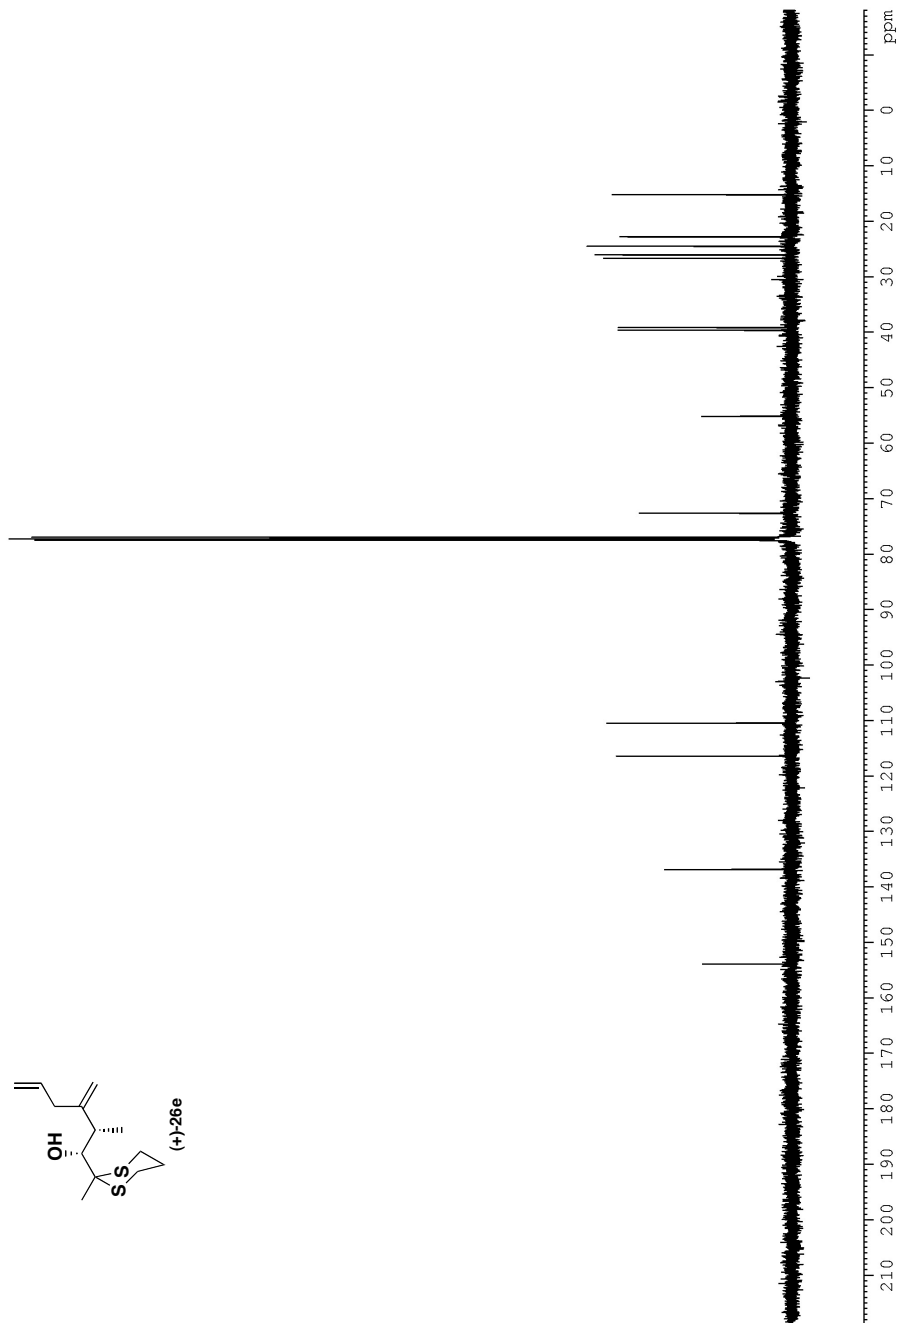

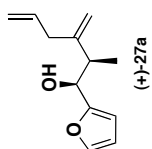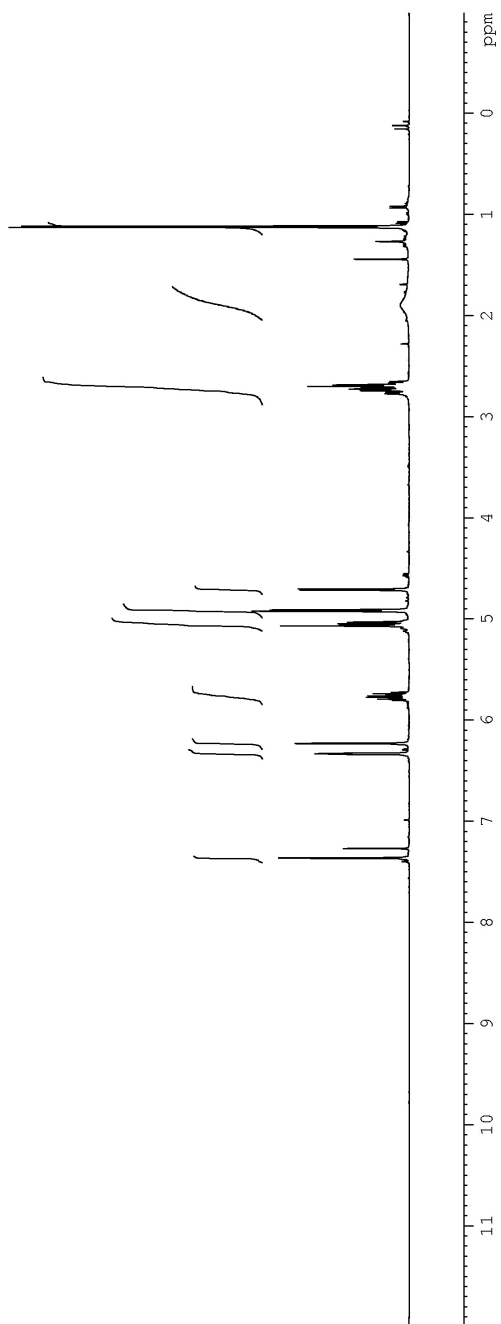

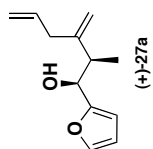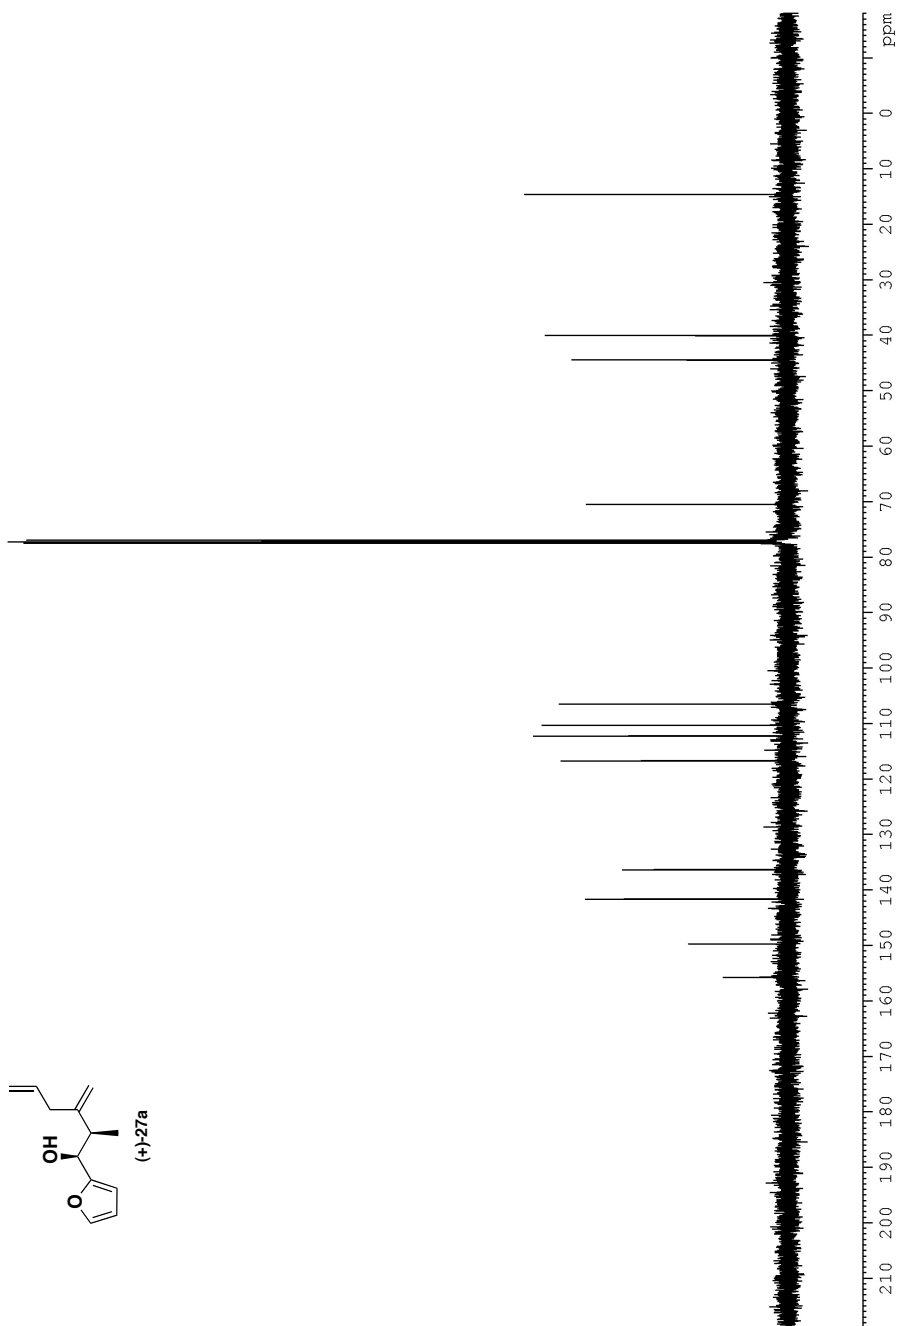

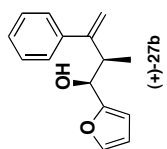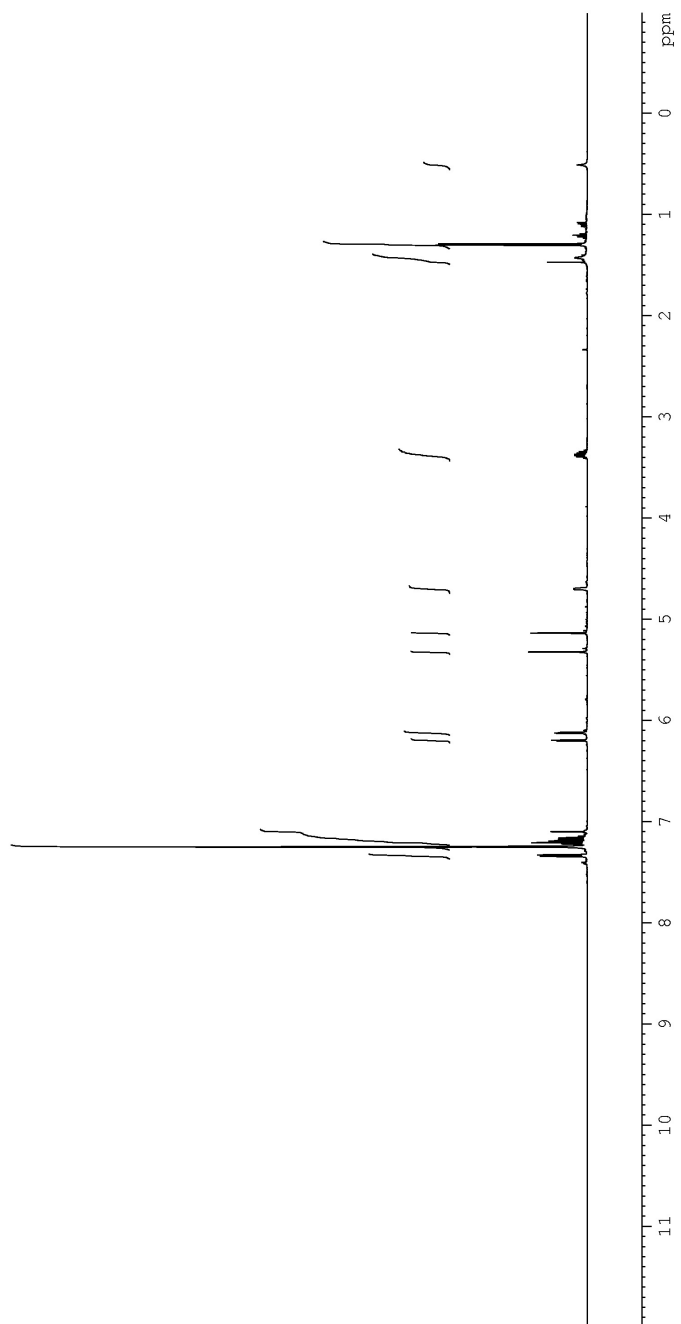

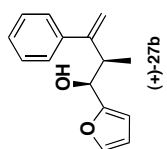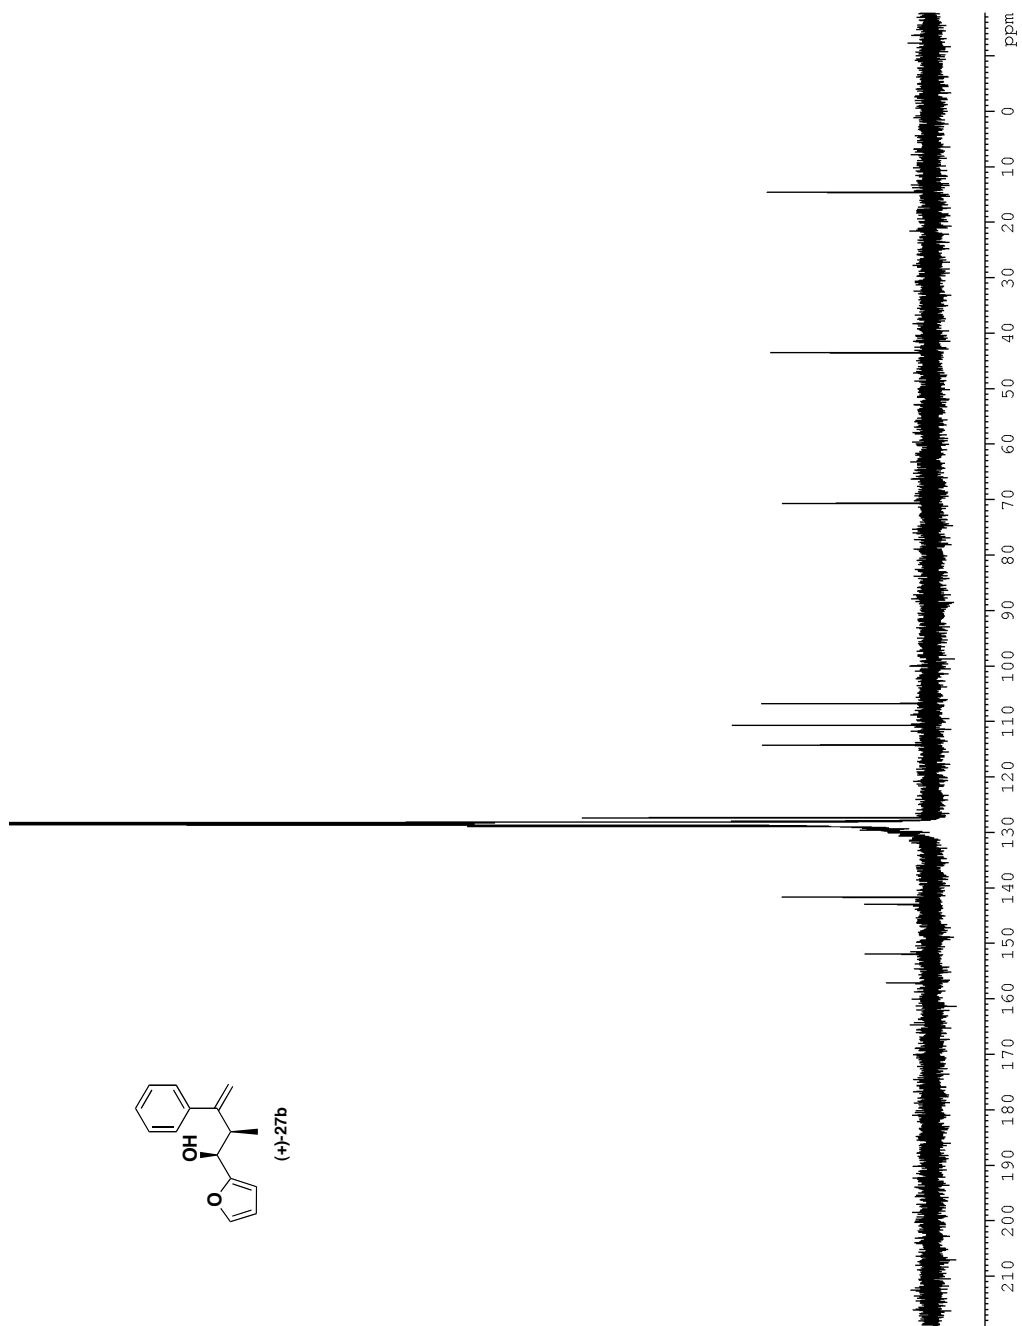

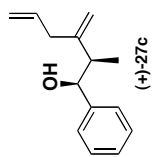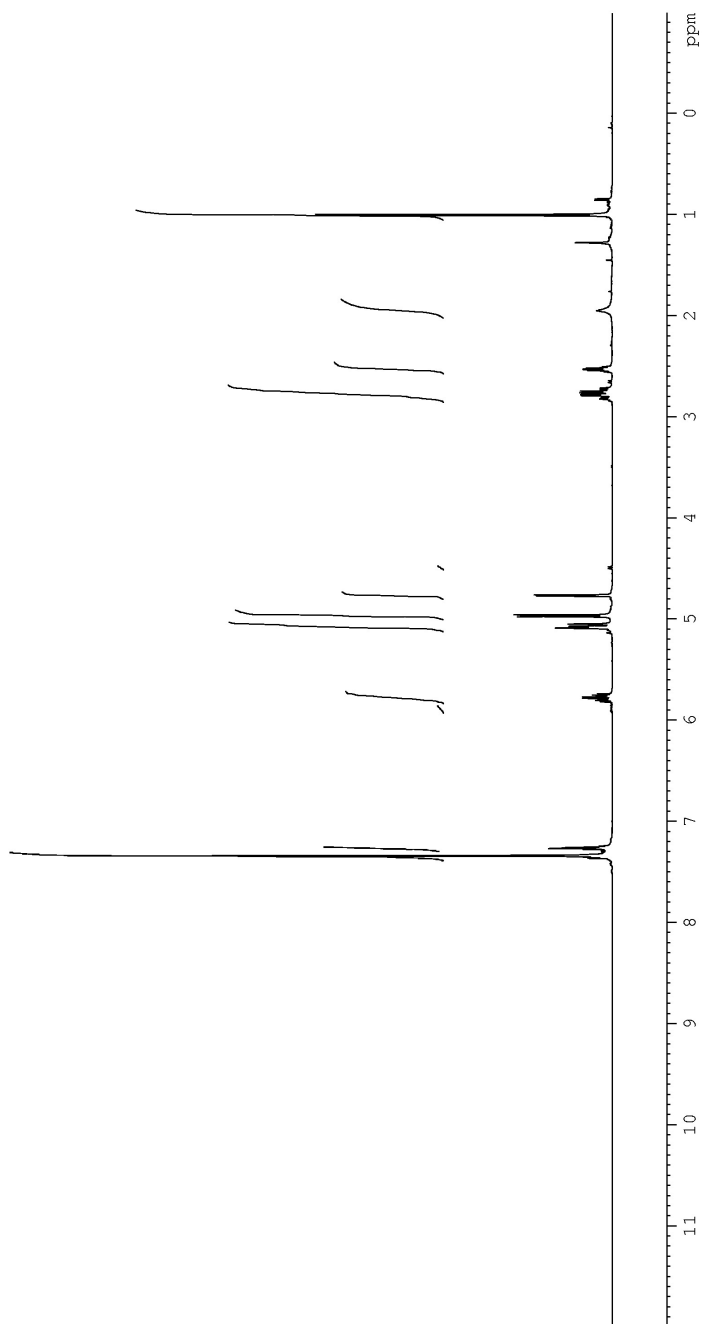





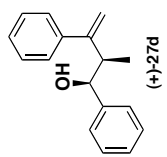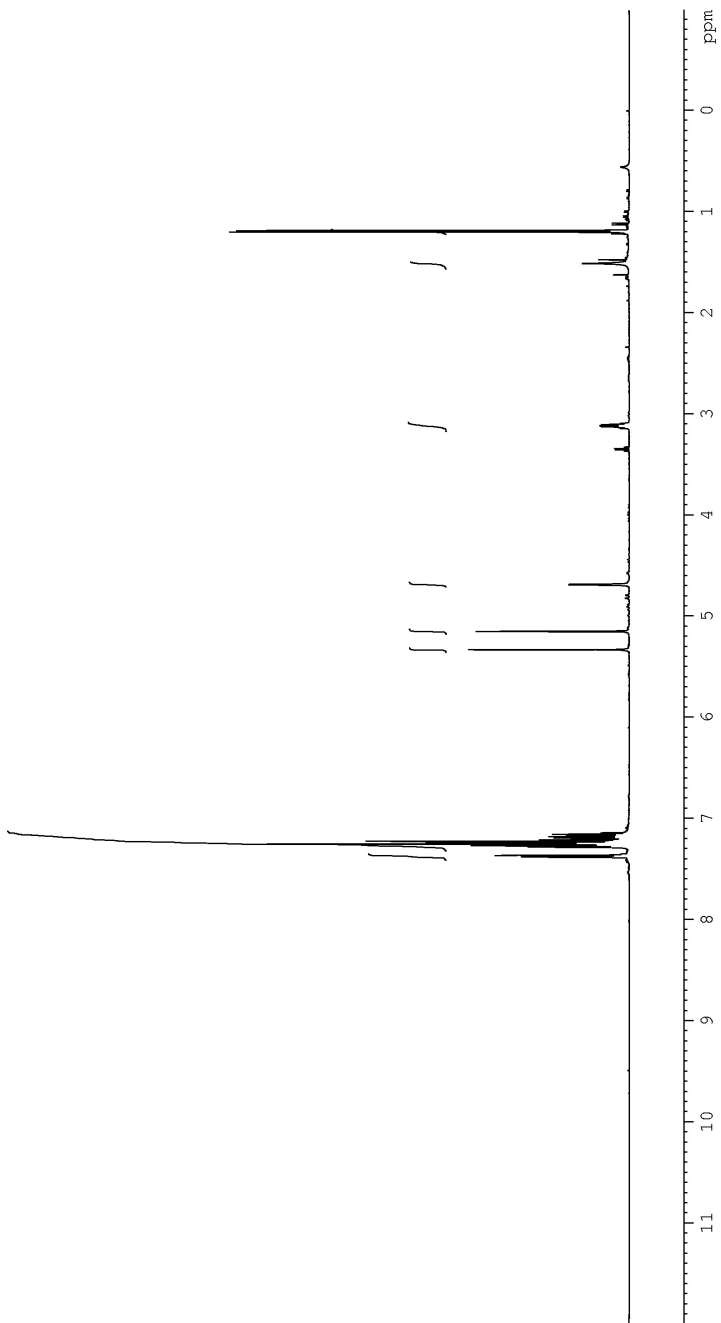

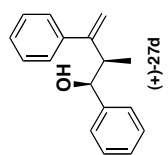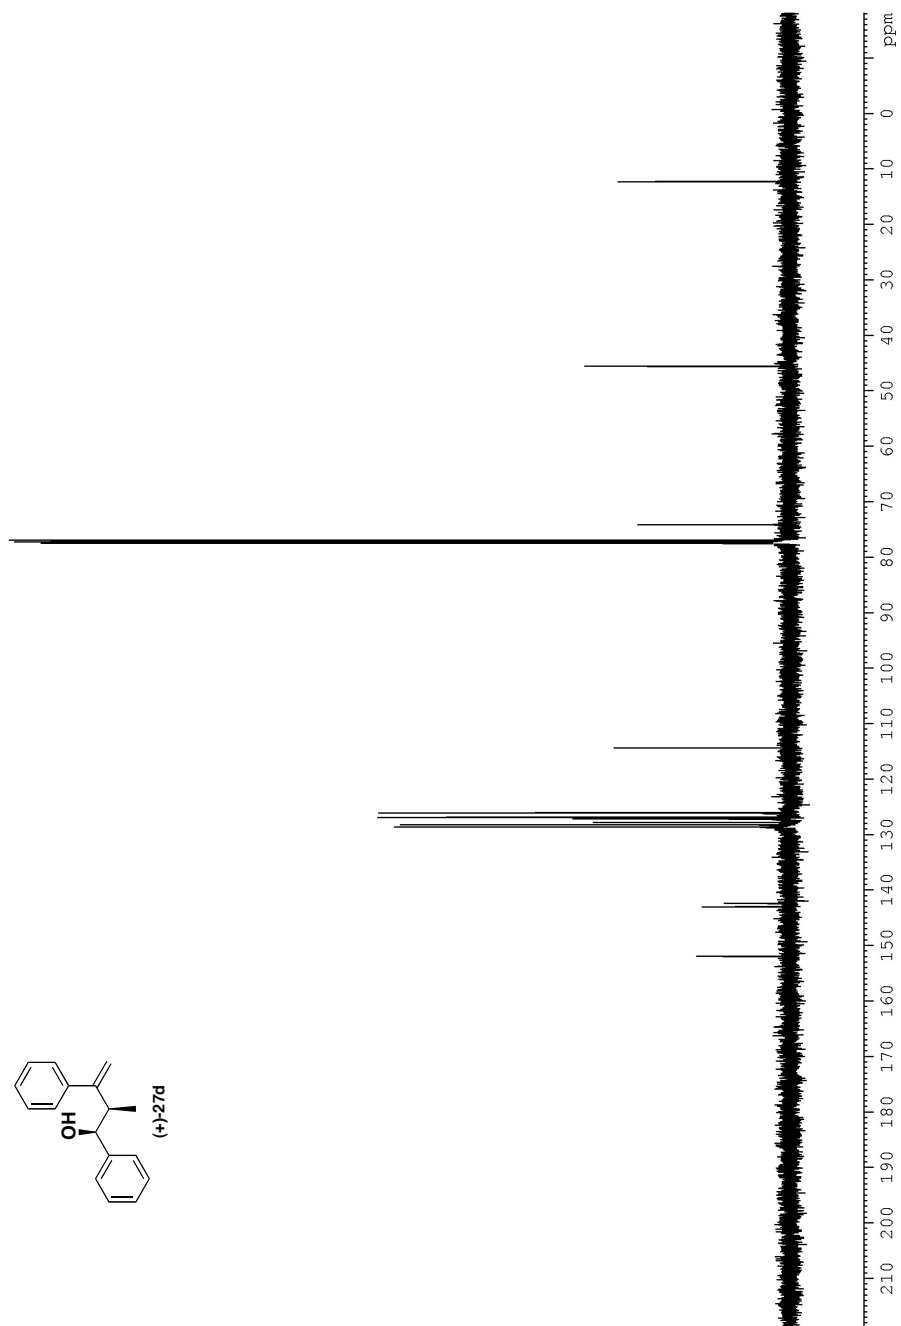

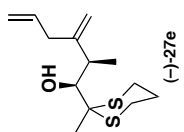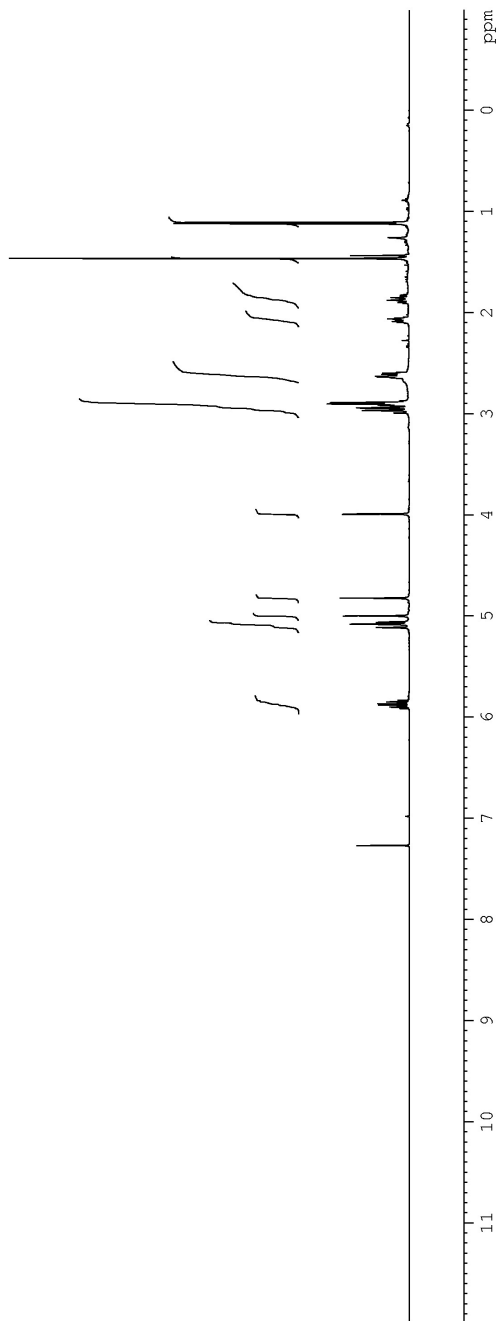

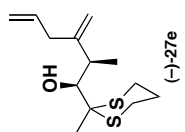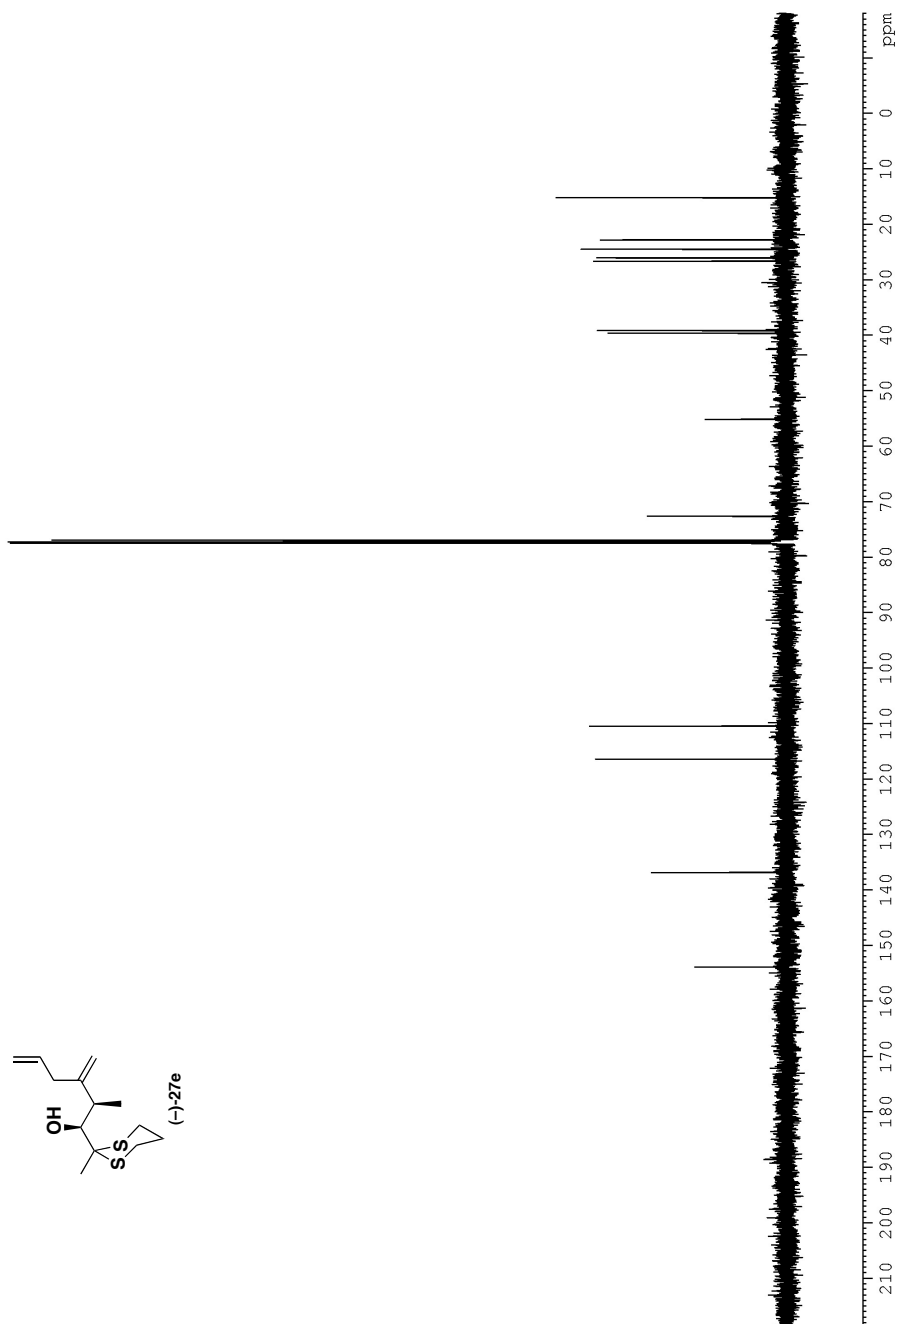

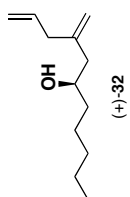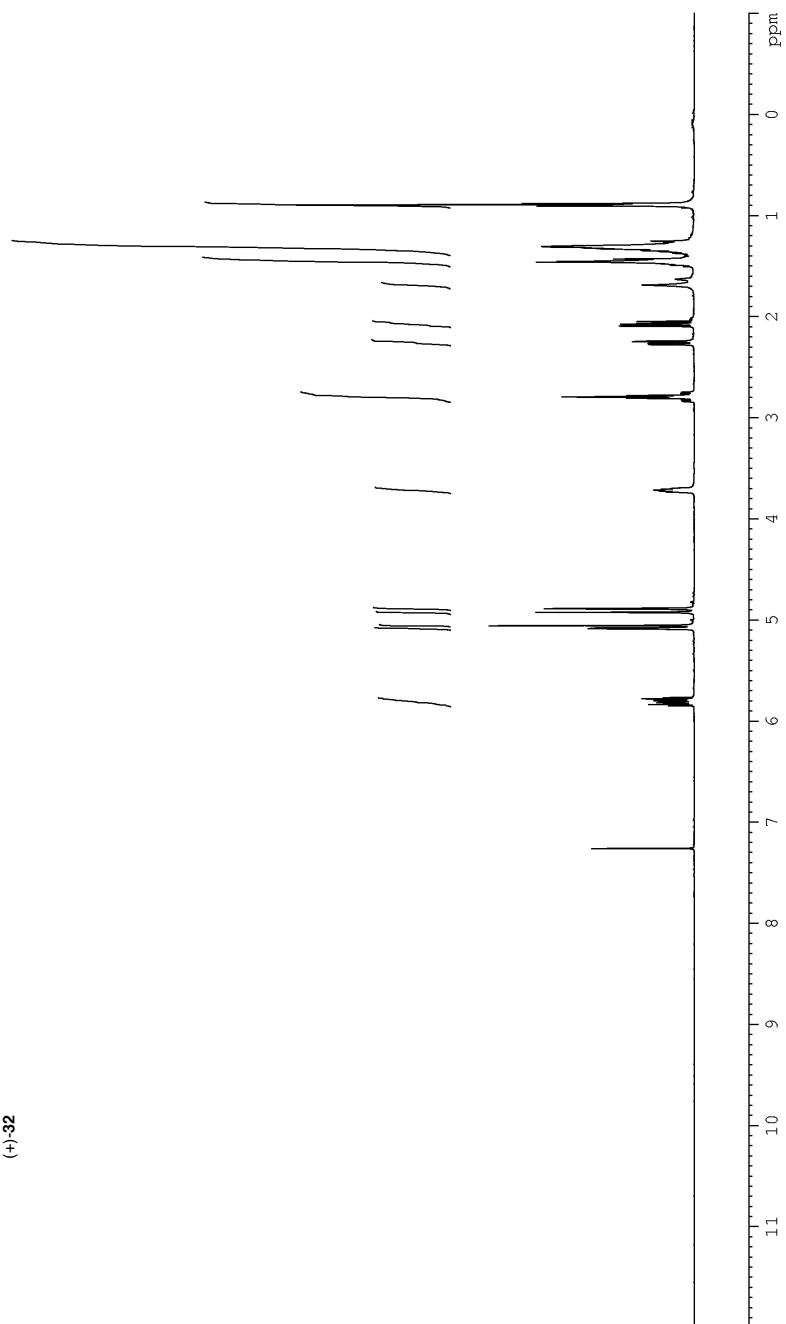

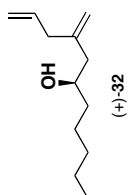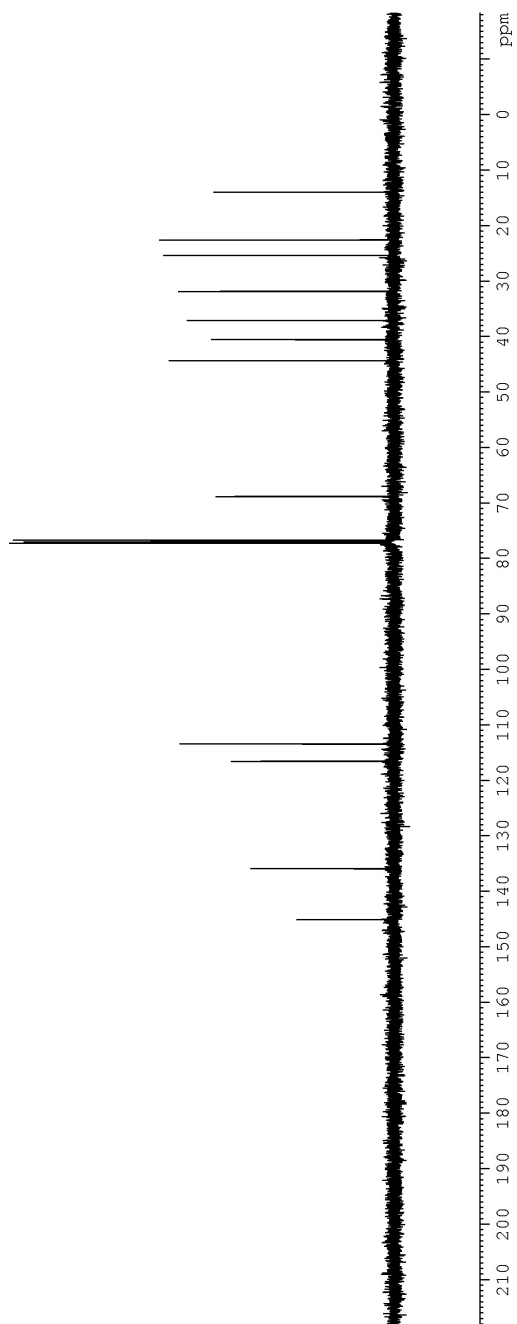

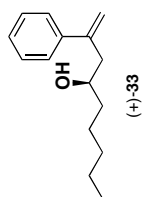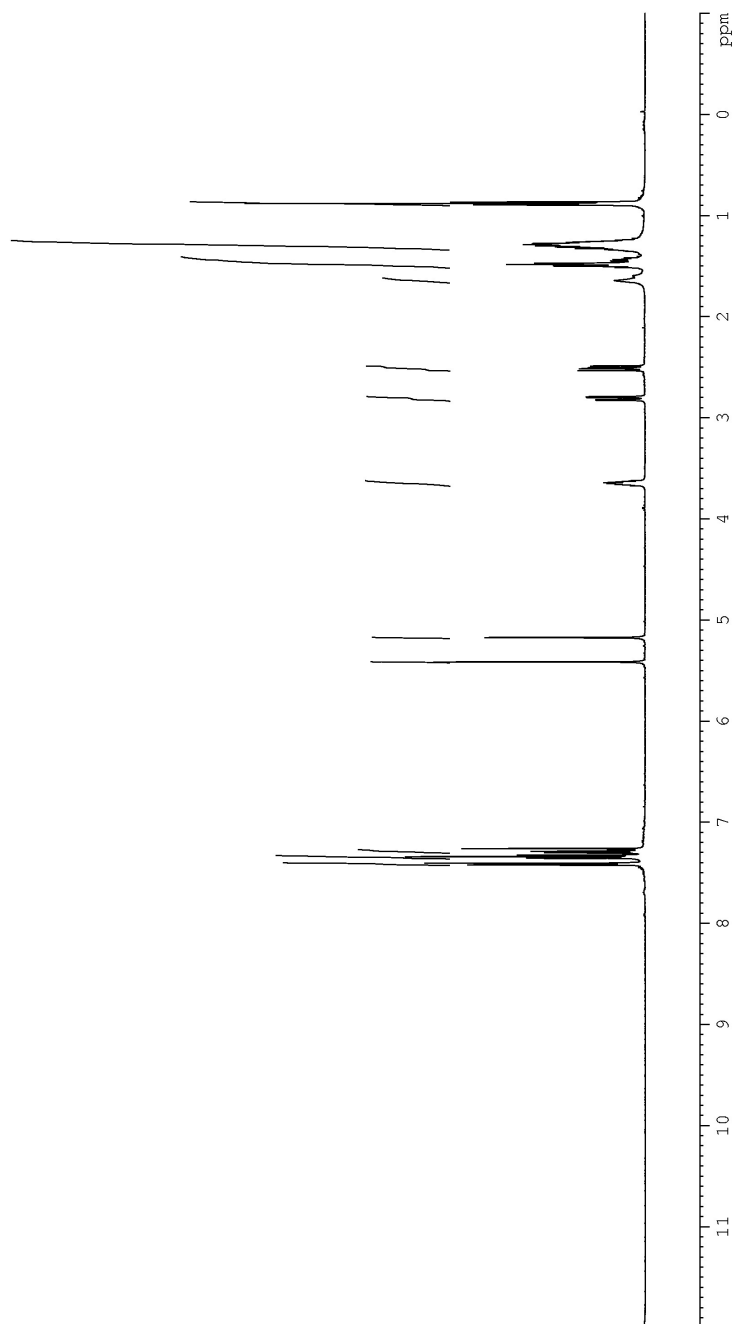

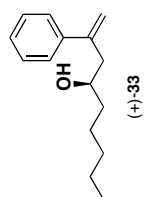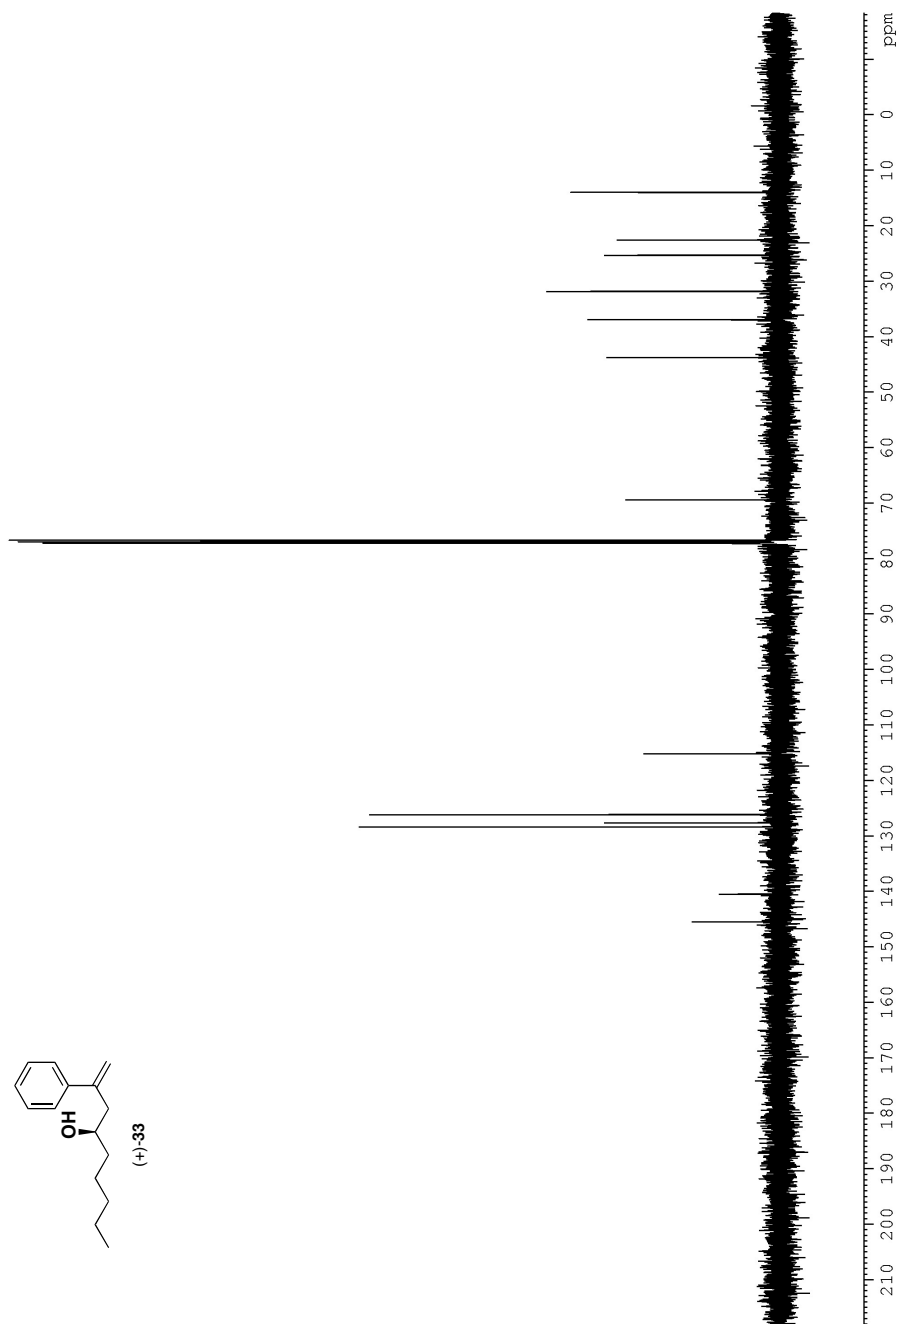



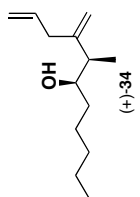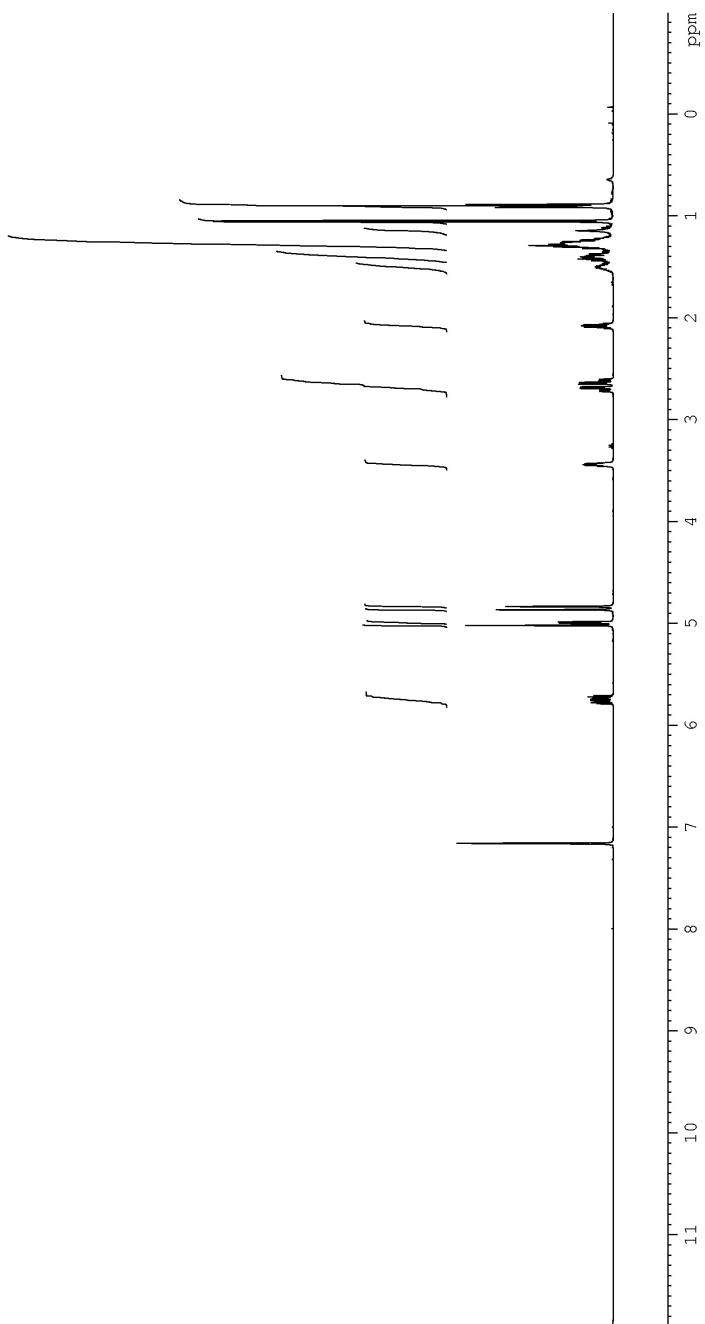

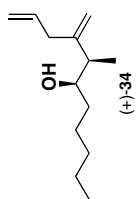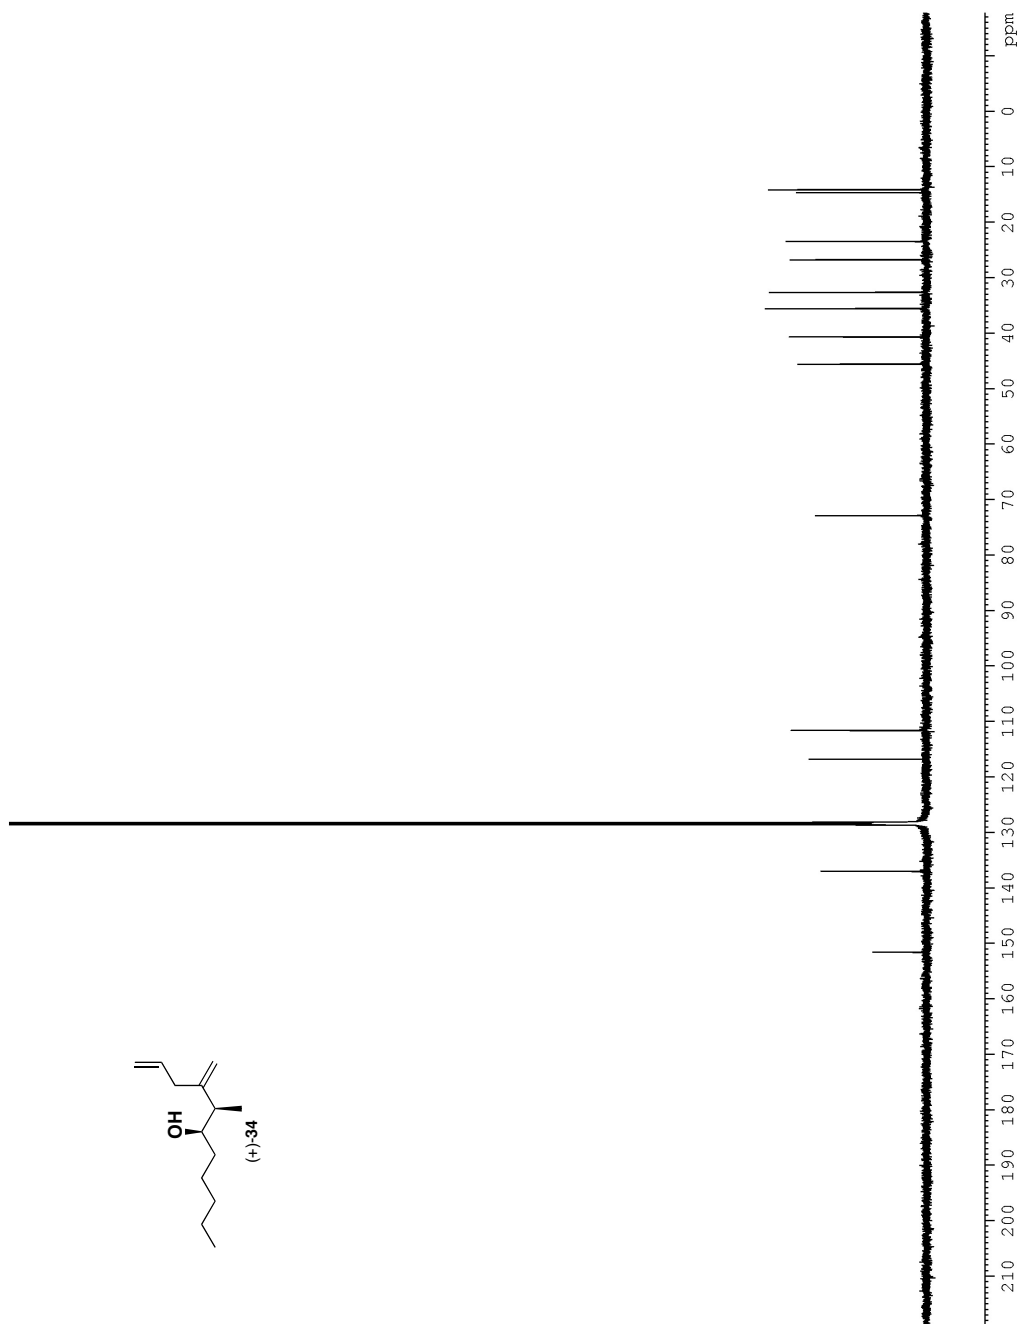

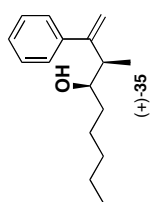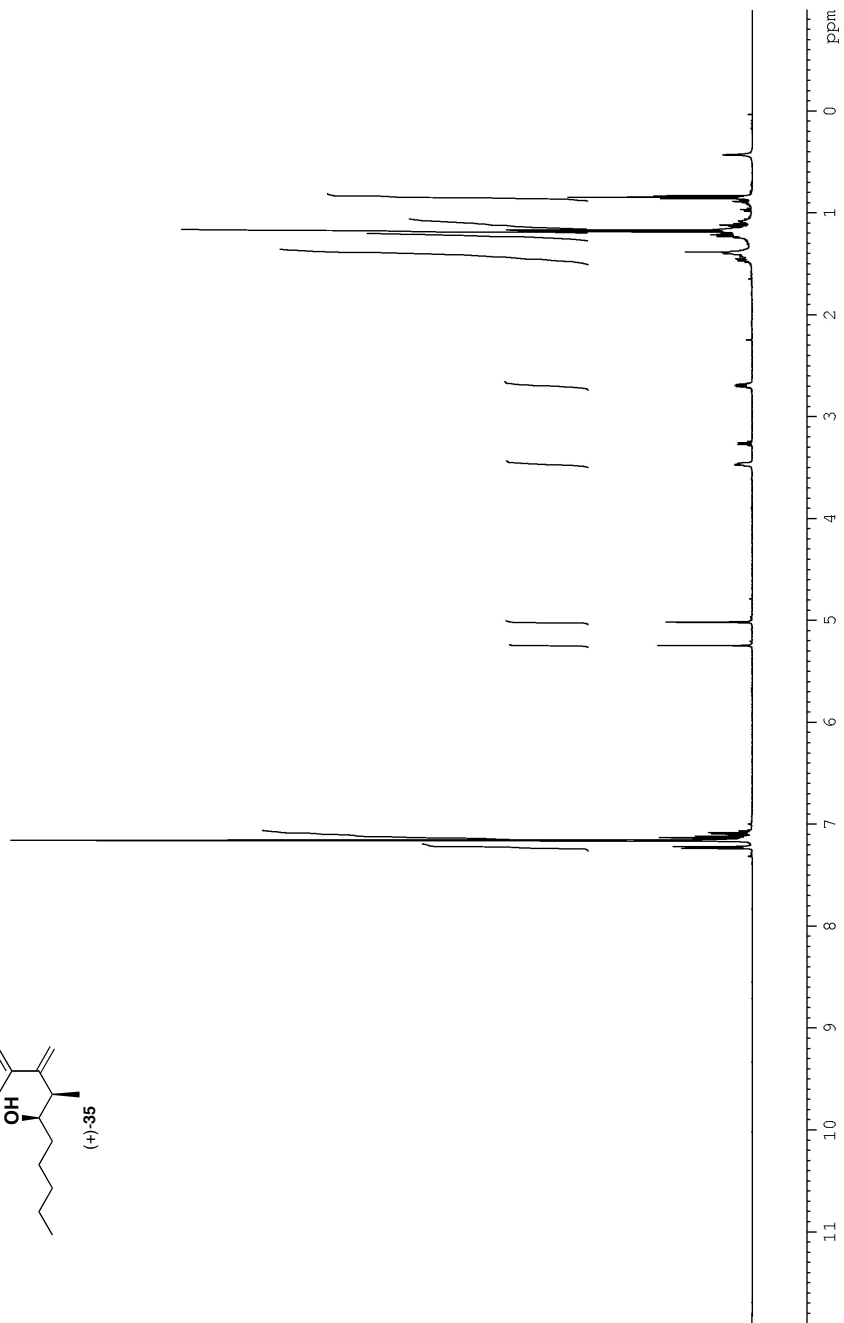

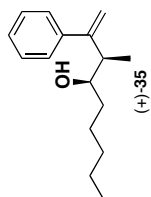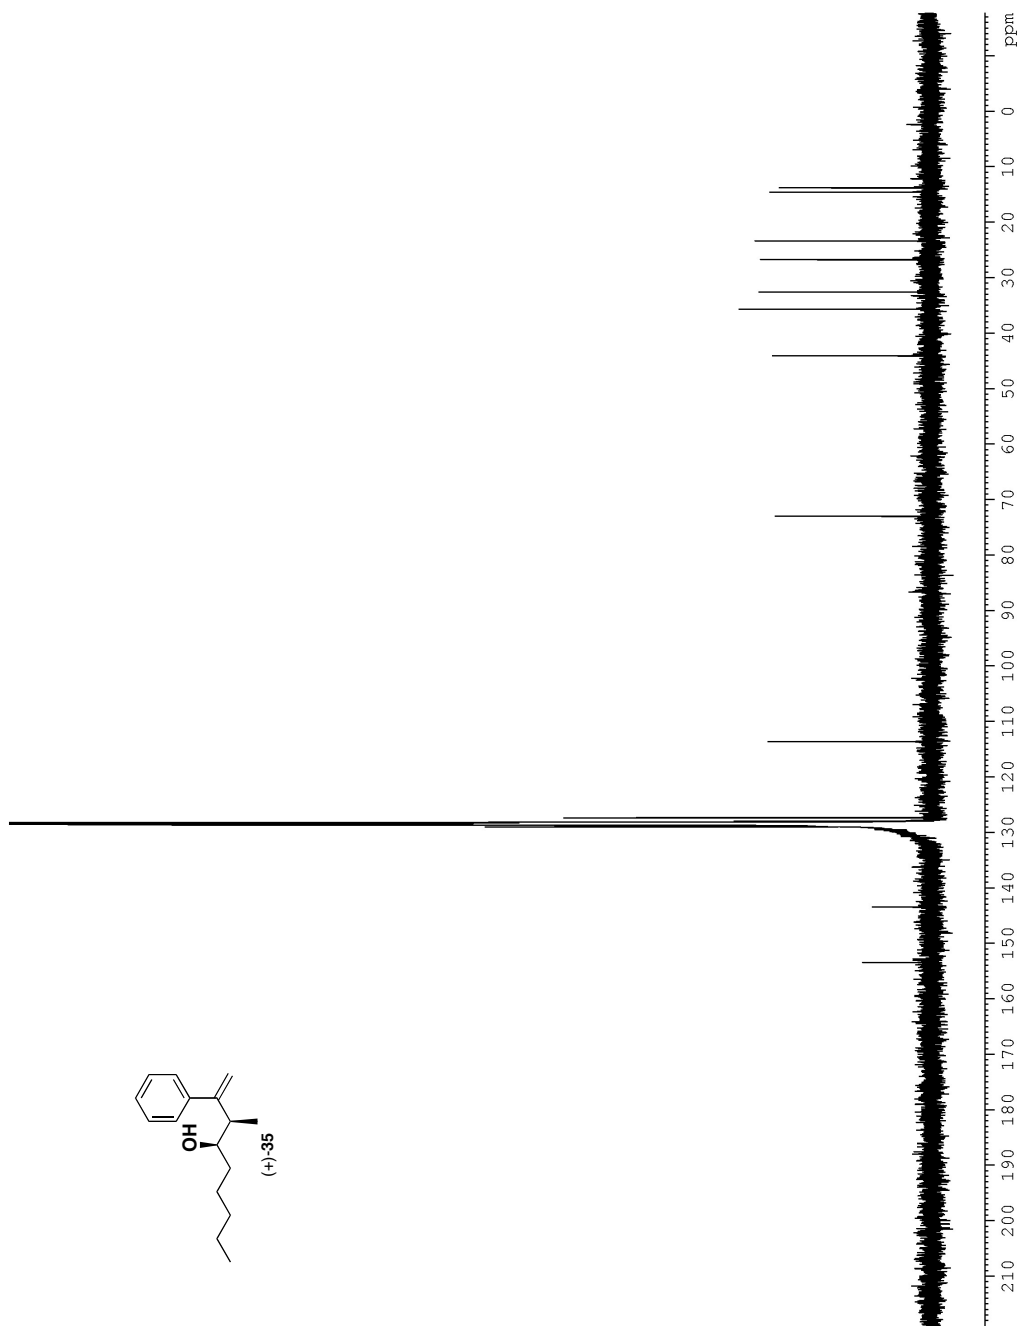

Supplement: NIHMS167148-supplement-1_si_001.pdf [file NIHMS167148-supplement-1_si_001.pdf]
